# Supplementary material
Source: PubMed Central journal article supplement (PMC7747653)

Supporting information for:

**Enantioselective Si–H insertion Reactions of Diarylcarbenes for the Synthesis of Silicon-Stereogenic Silanes**

Jake R. Jagannathan, James C. Fettinger, Jared T. Shaw\*, and Annaliese K. Franz\*

*Department of Chemistry, One Shields Ave, University of California, Davis, CA 95616*

\*jtshaw@ucdavis.edu \* akfranz@ucdavis.edu \*

|                                                |     |
|------------------------------------------------|-----|
| <b>I. General Information</b>                  | S2  |
| <b>II. Synthetic procedures</b>                | S3  |
| <b>III. Analysis and Optimization</b>          | S10 |
| <b>IV. Procedure for ReactIR Analysis</b>      | S15 |
| <b>V. Procedure for kinetic isotope effect</b> | S19 |
| <b>VI. Characterization Data</b>               | S21 |
| <b>VII. X-ray Crystallography Data</b>         | S66 |
| <b>VIII. References</b>                        | S69 |
| <b>IX. Copies of NMR spectra</b>               | S71 |

**\*CAUTION\*** Diazo compounds are high energy compounds and require careful treatment. We observed no problems throughout our work, but care should always be taken when handling large quantities of diazo compounds. See Bull *et. al.*<sup>1</sup> for risk analysis for related diazo compounds.

## I. General Information

The following abbreviations are used throughout: trimethylsilyl (TMS), Phenyltrimethylsilane (PhenylTMS), dirhodiumtetraacetate (Rh<sub>2</sub>(OAc)<sub>4</sub>), Tetrakis[(*R*)-(1-adamantyl)-(N-phthalimido)acetate]dirhodium(II) (Rh<sub>2</sub>(*R*-PTAD)<sub>4</sub>), Tetrakis[(*S*)-(N-phthalimido)-*tert*-lucinato]dirhodium(II) (Rh<sub>2</sub>(*S*-PTTL)<sub>4</sub>), Tetrakis[(*S*)-(N-biphenylphthalimido)-*tert*-lucinato]dirhodium(II) (Rh<sub>2</sub>(*S*-BPTTL)<sub>4</sub>), Tetrakis[(*S*)-N-(p-dodecylphenylsulfonyl)prolinato]dirhodium(II) (Rh<sub>2</sub>(*S*-DOSP)<sub>4</sub>), Tetrakis[(*S*)-[(1*S*)-1-(4-bromophenyl)-2,2-diphenylcyclopropanecarboxylato]dirhodium(II) (Rh<sub>2</sub>(*S*-BTPCP)<sub>4</sub>), Tetrakis[(*S*)-(N-tetrachlorophthalimido)-*tert*-lucinato]dirhodium(II) (Rh<sub>2</sub>(*S*-TCPTTL)<sub>4</sub>), Dirhodium(II)tetrakis[methyl 2-pyrrolidone-5(*S*)-carboxylate], (Rh<sub>2</sub>(*5R*-MEPY)<sub>4</sub>), Tetrakis[N-phthalimido-(*S*)-valinato]dirhodium (Rh<sub>2</sub>(*S*-PTV)<sub>4</sub>), ethyl acetate (EtOAc), isopropanol (IPA), tetrahydrofuran (THF), toluene (PhMe), dichloromethane (DCM), 1,2-dibromoethane (DBE), enantiomeric ratio (er), diastereomeric ratio (dr).

## Materials.

Cyclohexylphenylsilane,<sup>2</sup> triethylsiloxyphenylsilane,<sup>3</sup> 2-methoxybenzophenone,<sup>4</sup> naphthylphenylketone,<sup>5</sup> 2-trifluoromethyl benzophenone,<sup>6</sup> diphenyldiazomethane,<sup>6</sup> 4,4'-(diazomethylene)bis(chlorobenzene),<sup>7</sup> 4,4'-(diazomethylene) bis(methoxybenzene)<sup>7</sup> were made from previously published procedures. (Rh<sub>2</sub>(*S*-TCPTTL)<sub>4</sub> was purchased from TCI; Rh<sub>2</sub>(OAc)<sub>4</sub>, Rh<sub>2</sub>(*R*-PTAD)<sub>4</sub> and Rh<sub>2</sub>(*S*-BTPCP)<sub>4</sub> purchased from Strem Chemicals Inc. Rh<sub>2</sub>(*S*-PTV)<sub>4</sub>, Rh<sub>2</sub>(*S*-PTTL)<sub>4</sub>, (Rh<sub>2</sub>(*S*-BPTTL)<sub>4</sub> were donated by the Fox group. Dry CH<sub>2</sub>Cl<sub>2</sub>, THF, Et<sub>2</sub>O and PhMe were dispensed from a solvent purification system that passes solvent through two columns of dry neutral alumina prior to use. All other reagents, unless otherwise noted, were purchased from commercial sources. NOTE: it is necessary that the MnO<sub>2</sub> used for the oxidation of hydrazones be ~85% pure with an average particle size of 2 microns, appearing as a fine black powder (e.g. Oakwood Chemical, CAS #: 1313-13-9, cat. #: 094454, lot #: 094454K03K or Sigma Aldrich, cat: 217646-100G, Lot # MKCJ7777).

## Synthesis, Purification and Analysis.

All reactions were performed in oven-dried and argon-purged glassware (including 8 mL KIMAX Borosilicate glass vials fitted with rubber septa). Molecular sieves (4Å) were activated by flame-drying, then cooled under vacuum (<1 torr). All microwave experiments were run in a Biotage Initiator EXP EU 400W microwave synthesizer 2.0 (serial number 11031). Nuclear magnetic resonance (NMR) spectra were recorded at ambient temperature at 600, 400 MHz. Spectra obtained on Bruker Avance IIIHD Nanobay Spectrometer (400 MHz for <sup>1</sup>H; 100 MHz for <sup>13</sup>C; 292 MHz for <sup>19</sup>F; 79 MHz for <sup>29</sup>Si), and/or Varian VNMRS (600 MHz for <sup>1</sup>H; 151 MHz for <sup>13</sup>C, 119 MHz for <sup>29</sup>Si). The <sup>1</sup>H spectral data are reported as follows: chemical shifts were reported in parts per million downfield from tetramethylsilane internal standard on the δ scale, multiplicity (s, singlet; d, doublet; t, triplet; q, quartet; s, septet; m, multiplet; dd, doublet of doublets, and b, broadened), coupling constant (Hz), and integration. Carbon NMR chemical shifts are reported in ppm from tetramethylsilane with the solvent reference employed as the internal standard (deuteriochloroform (CDCl<sub>3</sub>) at 77.16 ppm). All silicon NMR's were taken with 0.05 M Cr(Acac)<sub>3</sub> as a T<sub>1</sub> Relaxation agent.

Compound **9** was analyzed by high resolution mass spectrometry (HRMS) using Thermo Fisher Orbitrap (San Jose, CA) using electrospray in the negative or positive ion mode >60,000 resolution and using typical ESI source values. Mass spectrometry data was obtained at the Mass Spectrometry Facilities of University of California, Davis. Insertion products were also analyzed by mass spectrometry on a Bruker UltraFlextreme MALDI mass spectrometer (Bruker Corp, Billerica, MA) in reflectron mode. Samples were first mixed in a 1:1 ratio with a saturated solution of alpha-hydroxycinnamic acid (Sigma Chemical Co) in high-purity water:MeCN (35%:65%) and 1mg of NaI to promote cationization was added before being spotted on the plate and allowed to air dry. Samples were analyzed using the minimum laser fluence to obtain adequate signal (s/n > 20), generally requiring 1000 shots per sample. Data was

analyzed in FlexAnalysis. Diazo compounds **3a-3d** were analyzed using low-resolution mass spectrometry with an Advion© ASAP-APCI-MS was achieved and the corresponding data is reported for those samples. Several samples (including silanes) did not ionize with any technique used and are noted in their characterization data.

Kinetic Analysis was performed using a Mettler Toldedo ReactIR 700 (serial number B929971514) with a liquid N<sub>2</sub> MCT detector fitted with a DiComp probe (serial number B939349478). The system was filled with liquid N<sub>2</sub> and allowed to cool for 1 h before kinetic experiments begun. Initial trends were found using iC IR 7.1 and further analyzed using Microsoft Excel.

High performance liquid chromatography (HPLC) data were obtained on Shimadzu LC-20AB system with CHIRALPAK® AD-H column (4.6 x 250 mm, 5 μm), CHIRALPAK® OD-H column (4.6 x 250 mm, 5 μm) or CHIRALPAK® AS column (4.6 x 250 mm, 5 μm) and Shimadzu SPD-M20A photodiode array detector. Each HPLC sample was eluted at a constant flow rate with isocratic (90:10 hexanes/isopropanol)/hexanes or (90:10 heptane/isopropanol)/heptane system and 40 °C column oven temperature.

## II. General Synthetic Procedures

### IIa. Procedures for Starting Material Syntheses

#### Method A: Synthesis of donor/donor diazo compounds

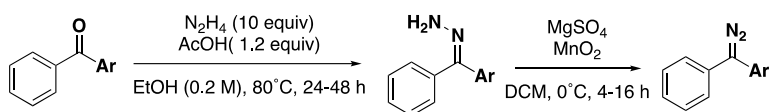

A 50-mL two-neck round-bottom flask with a stir bar and condenser was charged with ketone in anhydrous EtOH (0.2 M). Hydrazine (10 equiv), followed by AcOH (1.2 equiv) were added, the solution was heated to reflux. The reaction was monitored by TLC (7:3 hexanes/EtOAc) until the ketone was fully consumed. The reaction was allowed to cool to room temperature, and the solvent was removed via rotary evaporator. The resulting slurry was dissolved in Et<sub>2</sub>O (20 mL), washed with H<sub>2</sub>O (10 mL), brine (10 mL), and dried with Na<sub>2</sub>SO<sub>4</sub>. The solution was filtered, and the solvent was removed via rotary evaporator. The resulting hydrazone was verified to be present by TLC (7:3 hexanes EtOAc) and <sup>1</sup>H NMR, then carried on without further purification.

The crude hydrazone mixture was transferred into a flame dried round bottom flask purged with argon and charged with a stir bar. DCM (0.5M) was added, followed by MgSO<sub>4</sub> (100 mg/mmol). The solution was cooled down to 0 °C, and MnO<sub>2</sub> (8.0 equiv) was added in one portion. The solution was monitored by TLC (7:3 hexanes/ EtOAc) until all hydrazone was consumed. The solution was then filtered through celite, washed with DCM (3 x 10 mL), and the solvent was removed via rotary evaporator. Diazo products were purified by column chromatography using (99:1 hexanes: Et<sub>3</sub>N) on basic alumina.

Diazo compounds **3a-d** were found to be stable for > 48h at room temperature when stored under argon, and ~6 weeks at -23 °C. Diazo compound **2a** was found to readily decompose within 24 h at room temperature, so it was stored at -23 °C under argon, which increased stability to 2 weeks.

#### Method B: Synthesis of **3c**

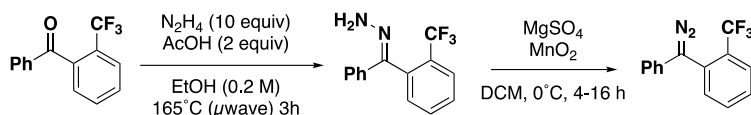

A 20-mL microwave vial with a stir bar was flamed dried, allowed to cool, then sealed. With an Ar balloon to equilibrate pressure, the vial was charged with 2-(2-(trifluoromethyl)phenyl)benzophenone in 10 mL EtOH (4 mmol, 0.4 M). Hydrazine (40 mmol, 1.28 mL), followed by AcOH (5 mmol, 286  $\mu$ L) were added, and the solution was sparged with Ar for 5 min. The microwave vial was heated in a microwave reactor to 165  $^{\circ}$ C for 3 h, with 15 sec of pre-stirring. The reaction was allowed to cool to room temperature, and the solvent was removed via rotary evaporator. The resulting slurry was dissolved in Et<sub>2</sub>O (20 mL), washed with H<sub>2</sub>O (10 mL), brine (10 mL), and dried with Na<sub>2</sub>SO<sub>4</sub>. The solution was filtered, and the solvent was removed via rotary evaporator. The crude hydrazone mixture was transferred into a flame dried round bottom flask purged with argon and charged with a stir bar. DCM (0.5M) was added, followed by MgSO<sub>4</sub> (100 mg/mmol). The solution was cooled down to 0 $^{\circ}$ C, and MnO<sub>2</sub> (32 mmol, 2.78 g) was added in one portion. The solution was monitored by TLC (7:3 hexanes/ EtOAc) until all hydrazone was consumed. The solution was then filtered through celite, washed with DCM (3 x 10 mL), and the solvent was removed via rotary evaporator. Diazo products were purified by column chromatography using (99:1 hexanes: Et<sub>3</sub>N) on basic alumina to furnish diazo **3c** as a red liquid in 44% yield (461.5 mg) over 2 steps.

### Method C: Synthesis of aryl-alkyl silanes using Grignards

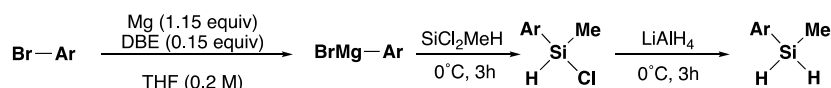

Magnesium turnings (1.15 equiv) were added to THF in an argon-purged 2-neck flask followed by the addition of DBE (0.15 equiv). The solution stirred for 1 h and turned black. The aryl bromide (1.0 equiv) was slowly added dropwise over a 20-minute period, and the solution was brought to reflux for up to 16 h, or until magnesium was no longer observed in the flask. The reaction was allowed to cool to room temperature and stirred an additional 15 minutes. The reaction was cooled to 0  $^{\circ}$ C with vigorous stirring, and an alkyldichlorosilane was added quickly in one portion, and stirred for an additional 2-3 hours with no further cooling. The reaction was cooled to 0 $^{\circ}$ C again, and LiAlH<sub>4</sub> (4.0 M solution in Et<sub>2</sub>O, 1.0 equiv) was added dropwise over a 5-minute period and stirred for an additional 2 h. The reaction was slowly quenched with the addition of saturated aq. Rochelle's salt, and filtered over celite. The organic layer was separated and the aqueous layer was washed with Et<sub>2</sub>O, then the organic layers were combined and washed with brine, dried with MgSO<sub>4</sub>, filtered, and then concentrated *in vacuo*. The products were purified either by bulb-to-bulb distillation via kugelrohr, sublimation, or column chromatography in hexanes.

### Method D: Synthesis of aryl-alkyl silanes using lithiates

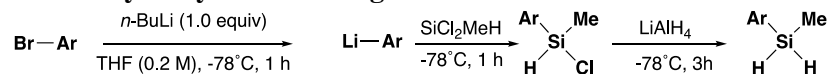

A round-bottom flask with stir bar was charged with an aryl bromide (1.0 equiv), and THF. The reaction was cooled to -78  $^{\circ}$ C with vigorous stirring, and *n*-BuLi (2.5 M solution in hexanes, 1.0 equiv) was added dropwise, and the reaction stirred for 1 h. The alkyldichlorosilane (1.0 equiv) was added quickly in one portion and stirred for an additional 1 h at -78 $^{\circ}$ C. LiAlH<sub>4</sub> (4.0 M solution in Et<sub>2</sub>O, 1.0 equiv) was added dropwise over a 5 minute period and stirred for an additional 2 h. The reaction was slowly quenched with the addition of saturated aq. Rochelle's salt, and filtered over celite. The organic layer was separated and the aqueous layer was washed with Et<sub>2</sub>O, then the organic layers were combined and washed with brine, dried with MgSO<sub>4</sub>, filtered, and then concentrated *in vacuo*. The products were purified either by bulb-to-bulb distillation via kugelrohr, sublimation, or column chromatography in hexanes to furnish pure silanes.

### Method E: Synthesis of **1m**



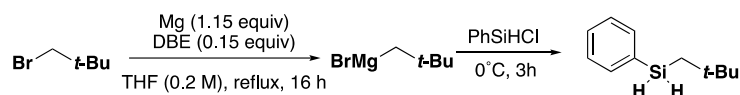

Magnesium turnings (1.15 equiv, 5.75 mmol, 140 mg) were added to an argon-purged, 25-mL 2-neck flask. THF (10 mL), followed by the addition of DBE (0.15 equiv) were added. The solution stirred for 1 h and turned black. Neopentyl bromide (1.0 equiv, 5.0 mmol, 630  $\mu$ L) was added dropwise, and the solution was brought to reflux for up to 16 h. The reaction was allowed to cool to room temperature and stirred an additional 15 minutes. The reaction was cooled to 0 °C with vigorous stirring, and chlorophenylsilane (1.0 equiv, 5.0 mmol, 666  $\mu$ L) was added quickly in one portion and stirred for an additional 2-3 hours with no further cooling. The reaction was slowly quenched with the addition of saturated aqueous  $\text{NH}_4\text{Cl}$  (10 mL) and filtered over celite. The organic layer was separated and the aqueous layer was washed with  $\text{Et}_2\text{O}$ , then the organic layers were combined and washed with brine, dried with  $\text{MgSO}_4$ , filtered, and then concentrated *in vacuo*. The crude mixture was purified by column chromatography (100 % hexanes) to furnish silane **1m** as an oil in 25% yield (231 mg, 1.3 mmol).

## IIb. Procedures for Enantioselective Si–H insertions (4a-o; 5a-j)

### Method E: Synthesis of racemic standard for HPLC analysis

A 4 mL reaction vial equipped with stir bar and 50 mg 4Å molecular sieves was heated under flame and dried under high vacuum (>1 torr). After the vial cooled to room temperature, it was purged with argon and  $\text{Rh}_2\text{OAc}_4$  (0.002 mmol), silane (0.5 mmol). The vial was re-purged with argon, and 1 mL of DCM was added. A diazo compound (0.1 mmol) was weighed into a separate flame-dried vial, and 1 mL of DCM was added, then drawn into a syringe. Using a long needle, the syringe was placed on a syringe pump with the needle *in* the stirring solution. The syringe pump was program to add the solution over a period of 1 hour at room temperature. After 1 h, the solution was diluted with 5 mL of hexane, and filtered through celite, and concentrated *in vacuo*. The presence of insertion product was verified by  $^1\text{H}$  NMR analysis, and HPLC analysis was then conducted.

### Method F: General procedure for enantioselective dirhodium(II)-catalyzed insertion with donor/donor carbenes (prochiral and symmetrical)

A 8 mL reaction vial equipped with stir bar and 100 mg 4Å molecular sieves was heated under flame and dried under high vacuum (>1 torr). After the vial cooled to room temperature, it was purged with argon, followed by addition of  $\text{Rh}_2(\text{S-TCPTTL})_4$  (0.002 mmol, 3.6 mg) and silane **1a** (1 mmol, 137  $\mu$ L). The vial was re-purged with argon, and 2 mL of PhMe was added. Diazo compound **3a** (0.2 mmol, 39.0 mg) was weighed into a separate flame-dried vial, and 2 mL of PhMe was added, then drawn into a syringe. Using a long needle, the syringe was placed on a syringe pump with the needle *in* the stirring solution. The syringe pump was programed to add the solution over a period of 1 h at room temperature.

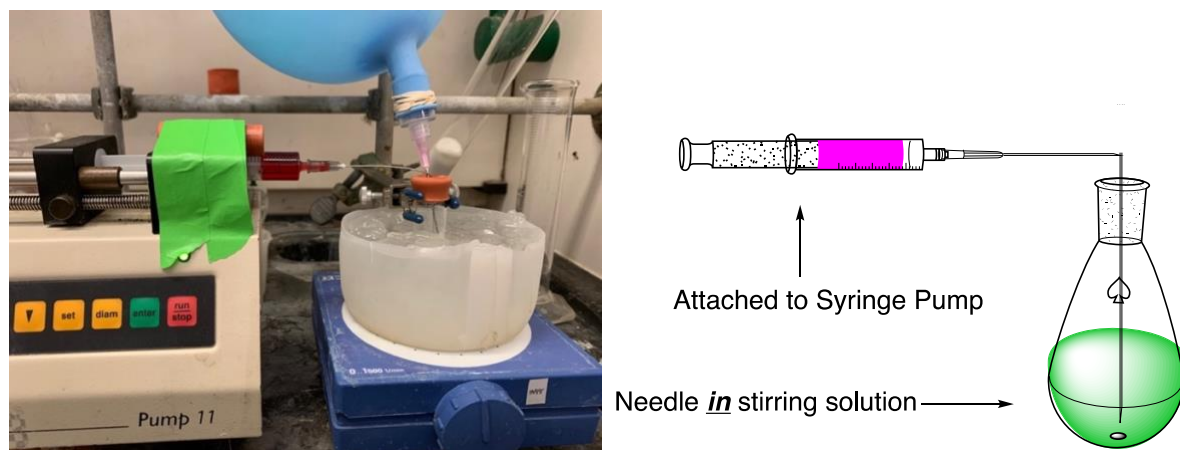

**Figure S1.** Example insertion with diagram

Thirty minutes after diazo addition, the solution was diluted with 5 mL of hexane, and filtered through celite, and concentrated *in vacuo*. The crude mixture was diluted in hexanes and ran through a short silica plug (4 cm in a Pasteur pipette) to remove catalyst, and concentrated *in vacuo*. The crude mixture was analyzed by NMR to determine dr, via the methyl resonance off the benzene ring. The product was then purified using column chromatography (dry loaded sample in silica, 98:2 hexanes/DCM) to furnish silane **5a** as an oil in 91% yield (55.0 mg, 0.18 mmol, 93:7 dr, 93:7 er).

### **Method G: Procedure for gram-scale enantioselective dirhodium(II)-catalyzed insertion of diazo **3a** and methylphenylsilane **1a****

A 100 mL round-bottom flask equipped with stir bar and 2.50 g of 4Å molecular sieves was heated in the oven for 24 h and dried under high vacuum (>1 torr). After the flask cooled to room temperature, Rh<sub>2</sub>(*S*-TCPTTL)<sub>4</sub> (0.0025 mmol, 5.1 mg) and methylphenylsilane **1a** (25.5 mmol, 3.50 mL) were added. The flask was purged with Ar, followed by addition of PhMe (25 mL). Diazo compound **3a** (5.1 mmol, 1.00 g) was weighed into a separate flame-dried vial, and 25 mL of PhMe was added, then drawn into a 30-mL syringe. Using a long needle, the syringe was placed on a syringe pump with the needle *in* the stirring solution. The syringe pump was programed to add the solution over a period of 2.5 h at room temperature.

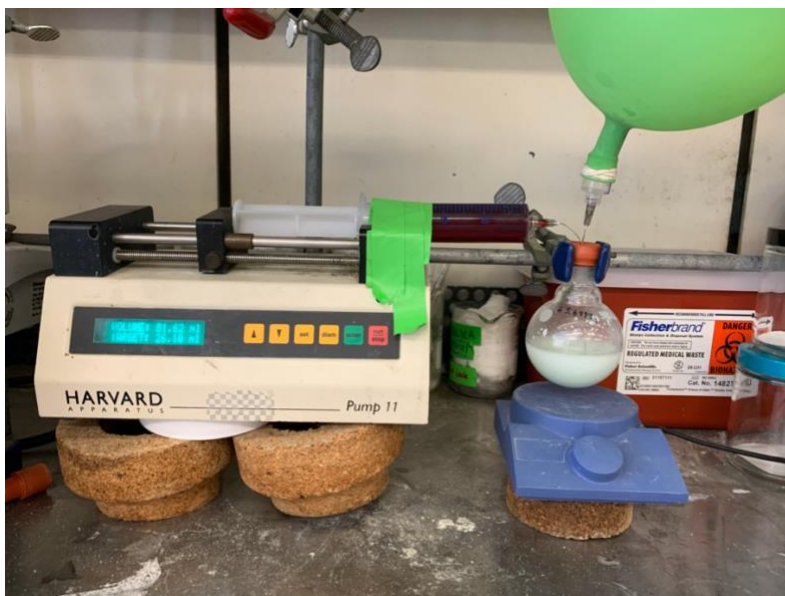

**Figure S2.** Gram-scale insertion

After 2.5 h, the solution was filtered, and concentrated *in vacuo*. The crude mixture was analyzed by NMR to determine dr, via the methyl resonance off the benzene ring. The product was then purified using column chromatography (dry loaded sample in silica, 98:2 hexanes/DCM) to furnish silane **5a** as an oil in 89% yield (93:7 dr, 1.34 g, 4.5 mmol).

Silane **5a** was found to be stable to air and atmospheric moisture for >3 weeks with minimal decomposition and no loss of dr or er.

## **Iic. Procedures for HPLC samples**

### **Method H: General procedure for hydrolysis for HPLC Analysis**

Silane was added to a 4 mL reaction vial, (10 mg) followed by THF/H<sub>2</sub>O (99:1 v/v, 0.5 mL), then Pd/C (10 mg) (preactivated with PhSiH<sub>3</sub>). The reaction was monitored by TLC until full consumption of the silane was observed. The reaction was filtered through celite and concentrated *in vacuo*. DCM (0.1 mL) was added, and the sample was spotted onto a TLC plate (5 x 5 cm). The plate was placed in a TLC chamber to develop, and the silanol was etched off the plate with a razor blade. The loose silica was washed with 70:30 hexanes:IPA (1.0 mL) and filtered through celite to furnish HPLC samples.

## IId. Procedures for Functionalization

### Method I: Tamao-Fleming Oxidation<sup>8</sup>

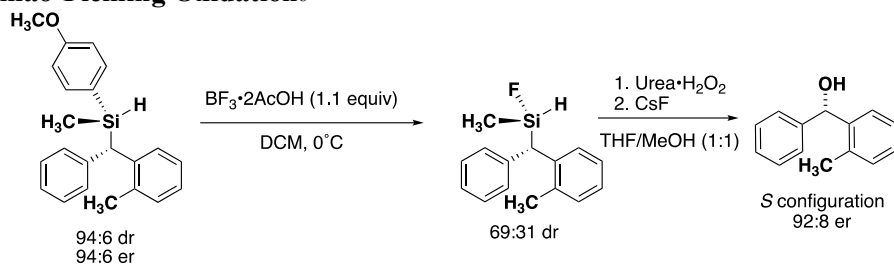

To a flame-dried, Ar-purged 8-mL reaction vial charged with stir bar, silane **5e** (258 mg, 0.77 mmol) was dissolved in DCM (3 mL) and added to the vial. The vial was cooled to 0°C, and  $\text{BF}_3 \cdot 2\text{AcOH}$  (120  $\mu\text{l}$ , 0.85 mmol) was added to the vial while stirring. The conversion of the arylsilane to the silyl-fluoride was monitored using TLC (9:1 hexanes/EtOAc). Once the reaction was complete the reaction was diluted with 10 mL of DCM. Saturated aqueous  $\text{NaHCO}_3$  solution (8 mL) was added and stirred until the evolution of gas ceased completely. The organic layer was separated, collected, and the aqueous layer was extracted with  $\text{CH}_2\text{Cl}_2$  (2 x 15 mL). The organic layer was dried over  $\text{Na}_2\text{SO}_4$  and concentrated *in vacuo* to afford a silyl-fluoride intermediate that could be isolated as a clear viscous oil and was identified using  $^1\text{H}$  NMR and  $^{19}\text{F}$  NMR spectroscopy. The silyl-fluoride was not purified and was carried forward directly into the next step. The crude mixture was dissolved in 1:1 MeOH:THF (5 mL), and transferred to a flame-dried flask charged with a stir bar. Next, urea hydrogen peroxide was added (80.0 mg, 0.85 mmol), and the reaction was monitored by TLC until full consumption of the silyl fluoride was observed. Lastly, CsF was added (128.4 mg, 0.85 mmol), and the reaction was monitored by TLC until benzhydrol **12** was observed (based on TLC). The reaction mixture was filtered through celite, washed with  $\text{H}_2\text{O}$  (5 mL), and dried over  $\text{Na}_2\text{SO}_4$ . The solution was filtered and concentrated *in vacuo* to furnish crude benzhydrol **12**. An HPLC sample of the reaction mixture was prepared and analyzed using CSP-HPLC (92:8 er); when compared to literature values, they matched with previously reported data with the *S*-configuration.

### Method J: C–H Silylation<sup>9</sup>

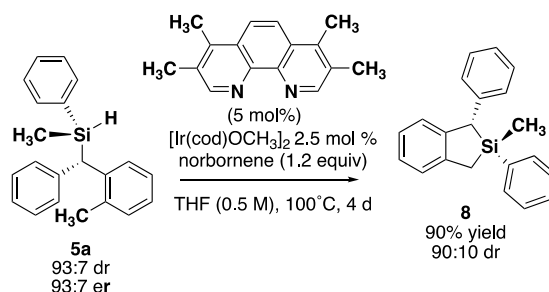

To a flame-dried, 4-mL reaction vial charged with stir bar, silane **5a** (100 mg, 0.33 mmol), norbornene, 3,4,7,8-tetramethyl-1,10-phenanthroline (2.0 mg, 0.0084 mmol),  $[\text{Ir}(\text{cod})\text{OMe}]_2$  (5.5 mg, 0.084 mmol) was purged with argon, then dissolved in THF (0.7 mL) and screwed tightly. The vial was heated to 100°C and stirred for 4 days. The reaction was allowed to cool to room temperature, then diluted with hexanes (10 mL), and filtered through a pad of celite. The organic solution was concentrated *in vacuo*, and the product was purified using column chromatography (98:2 hexanes/DCM) to furnish silane **11** as an oil in 90 % yield (89.2 mg, 90:10 dr).

### Method K: General Procedure for Pd/C Hydrolysis

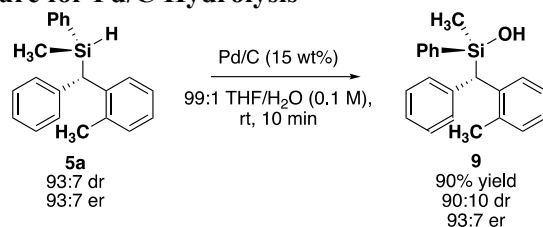

To a 4-mL reaction vial charged with stir bar, silane **5a** (100 mg, 0.33 mmol, 93:7 dr; 93:7 er), Pd/C (15.0 mg, 15 wt%) was purged with argon, then dissolved in THF (containing ~1% v/v H<sub>2</sub>O). The consumption of starting material was monitored by TLC, about 10 min. Once fully consumed, DCM (5 mL) was added, and the reaction was filtered through a thin pad of celite. The solution was dried with Na<sub>2</sub>SO<sub>4</sub>, filtered, and concentrated *in vacuo*. The product was purified using column chromatography (95:5 hexanes/EtOAc) to furnish silanol **9** as an oil in 90% yield (94.6 mg, 90:10 dr, 93:7 er).

### Method L: Dehydro-coupling reaction

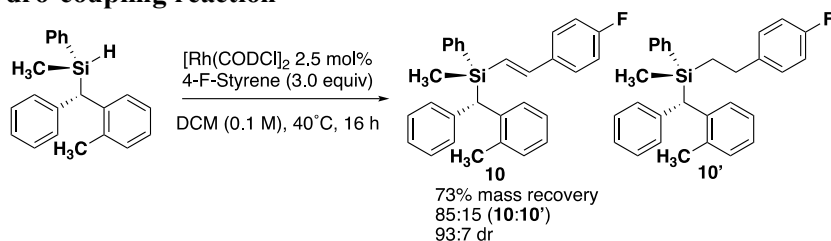

To a flame-dried, 8-mL reaction vial charged with stir bar, silane **5a** (104 mg, 0.34 mmol, 93:7 dr; 93:7 er), 4-fluorostyrene (19  $\mu$ L, 1.0 mmol) was purged with argon, then dissolved in DCM (3.5 mL). After 5 min, [Rh(COD)Cl]<sub>2</sub> (0.03 equiv, 5.2 mg, 0.01 mmol) was added, and the solution turned yellow, and was heated to 40°C and stirred for 16 h. The reaction was diluted with hexanes and filtered through a thin silica pad to remove catalyst. The solvent was removed via rotary evaporator, and the product was purified using column chromatography (98:2 $\rightarrow$ 90:10 hexanes/DCM) to furnish silane **10** as an oil in 62% yield (73% mass recovery (104.1 mg); 85:15 mixture with hydrosilylation product **10'**, 93:7 dr by <sup>19</sup>F NMR). The determination of 85:15 was confirmed using <sup>1</sup>H NMR Spectroscopy by comparing the relative integrals of the peaks at 4.10 and 3.97 ppm.

### III. Analysis and Optimization

#### IIIa. Optimization of enantioselective donor/donor carbene insertion of prochiral silanes

Table S1. Optimization of Enantioselective donor/donor insertion into prochiral silanes

Reaction scheme:  $1a$  (5 equiv) +  $2a$  ( $R = H$ ) or  $3a$  ( $R = CH_3$ )  $\xrightarrow[23\text{ }^\circ\text{C, 1.5 h}]{1\text{ mol \% Rh}_2\text{L}_4, \text{DCM (0.05 M), 4 \AA MS}}$   $4a$  ( $R = H$ ) or  $5a$  ( $R = CH_3$ )

*Inverse addition*

| Entry           | R               | Catalyst                                         | % loading | Solvent     | Temp | additive            | % yield <sub>a</sub> | dr <sup>b</sup> | er <sup>c</sup> |
|-----------------|-----------------|--------------------------------------------------|-----------|-------------|------|---------------------|----------------------|-----------------|-----------------|
| 1               | H               | Cu(OTf) <sub>2</sub>                             | 10        | DCM         | rt   | -                   | <5                   | -               | -               |
| 2               | H               | Cu[MeCN] <sub>4</sub> PF <sub>6</sub>            | 10        | DCM         | rt   | -                   | <5                   | -               | -               |
| 3               | H               | (Ir[COD]Cl) <sub>2</sub>                         | 5         | DCM         | rt   | -                   | <5                   | -               | -               |
| 4               | H               | [IrCpCl] <sub>2</sub>                            | 5         | DCM         | rt   | -                   | <5                   | -               | -               |
| 5               | H               | [Ru(p-cymeme)Cl] <sub>2</sub>                    | 5         | DCM         | rt   | -                   | <5                   | -               | -               |
| 6               | H               | Fe(OTf) <sub>2</sub>                             | 20        | DCM         | rt   | -                   | <5                   | -               | -               |
| 7               | H               | Rh <sub>2</sub> OAc <sub>4</sub>                 | 1         | DCM         | rt   | -                   | 35                   | -               | 50:50           |
| 8               | H               | Rh <sub>2</sub> ( <i>R</i> -PTAD) <sub>4</sub>   | 1         | DCM         | rt   | -                   | 72                   | -               | 61:39           |
| 9               | H               | Rh <sub>2</sub> ( <i>S</i> -PTTL) <sub>4</sub>   | 1         | DCM         | rt   | -                   | 62                   | -               | 64:36           |
| 10              | H               | Rh <sub>2</sub> ( <i>S</i> -BP TTL) <sub>4</sub> | 1         | DCM         | rt   | -                   | 62                   | -               | 64:36           |
| 11              | H               | Rh <sub>2</sub> ( <i>S</i> -PTV) <sub>4</sub>    | 1         | DCM         | rt   | -                   | 67                   | -               | 59:41           |
| 12              | H               | Rh <sub>2</sub> ( <i>S</i> -DOSP) <sub>4</sub>   | 1         | DCM         | rt   | -                   | 64                   | -               | 55:45           |
| 13              | H               | Rh <sub>2</sub> ( <i>S</i> -BTPCP) <sub>4</sub>  | 1         | DCM         | rt   | -                   | <5                   | -               | ND              |
| 14              | H               | Rh <sub>2</sub> ( <i>5R</i> -MEPY) <sub>4</sub>  | 1         | DCM         | rt   | -                   | <5                   | -               | ND              |
| 15              | H               | Rh <sub>2</sub> ( <i>S</i> -TCPTTL) <sub>4</sub> | 1         | DCM         | rt   | 4 Å MS <sub>d</sub> | 76                   | -               | 76:24           |
| 16              | H               | Rh <sub>2</sub> ( <i>S</i> -TCPTTL) <sub>4</sub> | 3         | Heptane     | rt   | 4 Å MS <sub>d</sub> | 78                   | -               | 82:18           |
| 17              | H               | Rh <sub>2</sub> ( <i>S</i> -TCPTTL) <sub>4</sub> | 3         | Benzene     | rt   | 4 Å MS <sub>d</sub> | 74                   | -               | 82:18           |
| 18              | H               | Rh <sub>2</sub> ( <i>S</i> -TCPTTL) <sub>4</sub> | 3         | Cyclohexane | rt   | 4 Å MS <sub>d</sub> | 74                   | -               | 82:18           |
| 19              | H               | Rh <sub>2</sub> ( <i>S</i> -TCPTTL) <sub>4</sub> | 3         | PhMe        | rt   | 4 Å MS <sub>e</sub> | 78                   | -               | 82:18           |
| 20              | CH <sub>3</sub> | Rh <sub>2</sub> OAc <sub>4</sub>                 | 1         | PhMe        | rt   | 4 Å MS <sub>e</sub> | 45                   | 55:45           | 50:50           |
| 21              | CH <sub>3</sub> | Rh <sub>2</sub> OAc <sub>4</sub>                 | 1         | PhMe        | rt   | 4 Å MS <sub>e</sub> | 45                   | 55:45           | 50:50           |
| 22              | CH <sub>3</sub> | Rh <sub>2</sub> ( <i>R</i> -PTAD) <sub>4</sub>   | 1         | PhMe        | rt   | 4 Å MS <sub>e</sub> | 75                   | 63:37           | ND              |
| 24              | CH <sub>3</sub> | Rh <sub>2</sub> ( <i>S</i> -DOSP) <sub>4</sub>   | 1         | PhMe        | rt   | 4 Å MS <sub>e</sub> | 70                   | 61:39           | ND              |
| 25              | CH <sub>3</sub> | Rh <sub>2</sub> ( <i>S</i> -BTPCP) <sub>4</sub>  | 1         | PhMe        | rt   | 4 Å MS <sub>e</sub> | <5                   | -               | ND              |
| 26              | CH <sub>3</sub> | Rh <sub>2</sub> ( <i>S</i> -TCPTTL) <sub>4</sub> | 1         | PhMe        | rt   | 4 Å MS <sub>e</sub> | 91                   | 92:8            | 93:7            |
| 27              | CH <sub>3</sub> | Rh <sub>2</sub> ( <i>S</i> -TCPTTL) <sub>4</sub> | 0.1       | PhMe        | rt   | 4 Å MS <sub>e</sub> | 85                   | 93:7            | 93:7            |
| 28              | CH <sub>3</sub> | Rh <sub>2</sub> ( <i>S</i> -TCPTTL) <sub>4</sub> | 0.01      | PhMe        | rt   | 4 Å MS <sub>e</sub> | 88                   | 93:7            | 93.5:6.5        |
| 29              | CH <sub>3</sub> | Rh <sub>2</sub> ( <i>S</i> -TCPTTL) <sub>4</sub> | 0.001     | PhMe        | rt   | 4 Å MS <sub>e</sub> | 32                   | 93:7            | 93.5:6.5        |
| 30 <sub>f</sub> | CH <sub>3</sub> | Rh <sub>2</sub> ( <i>S</i> -TCPTTL) <sub>4</sub> | 0.05      | PhMe        | rt   | 4 Å MS <sub>e</sub> | 89                   | 93:7            | 93.5:6.5        |

| Entry           | R               | Catalyst                                | % loading | Solvent | Temp  | additive            | % yield <sup>a</sup> | dr <sup>b</sup> | er <sup>c</sup> |
|-----------------|-----------------|-----------------------------------------|-----------|---------|-------|---------------------|----------------------|-----------------|-----------------|
| 31 <sub>g</sub> | CH <sub>3</sub> | Rh <sub>2</sub> (S-TCPTTL) <sub>4</sub> | 1         | PhMe    | rt    | 4 Å MS <sup>e</sup> | 40                   | 92:8            | 93:7            |
| 32 <sub>h</sub> | CH <sub>3</sub> | Rh <sub>2</sub> (S-TCPTTL) <sub>4</sub> | 1         | PhMe    | rt    | 4 Å MS <sup>e</sup> | 81                   | 92:8            | 93:7            |
| 33              | CH <sub>3</sub> | Rh <sub>2</sub> (S-TCPTTL) <sub>4</sub> | 1         | PhMe    | 0°C   | 4 Å MS <sup>e</sup> | 78                   | 93:7            | 93:7            |
| 34              | CH <sub>3</sub> | Rh <sub>2</sub> (S-TCPTTL) <sub>4</sub> | 1         | PhMe,   | -30°C | 4 Å MS <sup>e</sup> | <5                   | -               | ND              |
| 35              | CH <sub>3</sub> | Rh <sub>2</sub> (S-TCPTTL) <sub>4</sub> | 1         | PhMe,   | -78°C | 4 Å MS <sup>e</sup> | <5                   | -               | ND              |

<sup>a</sup> Determined using <sup>1</sup>H NMR analysis using PhTMS as an internal standard. <sup>b</sup> Determined using <sup>1</sup>H NMR analysis of isolated product prior to purification.

<sup>c</sup> Determined using CSP-HPLC after Pd/C hydrolysis. <sup>d</sup> MS were heated under high vacuum (>1 torr) and cooled to rt prior to use. <sup>e</sup> MS were flame dried and dried under high vacuum (>1 torr). <sup>f</sup> Reaction run on gram scale for **3a** (5.1 mmol) at 0.1 M PhMe. <sup>g</sup> Diazo was added in a single portion. <sup>h</sup> Diazo added dropwise by hand over 5 minutes.

### IIIb. Optimization of C–H silylation of Silane **5a**

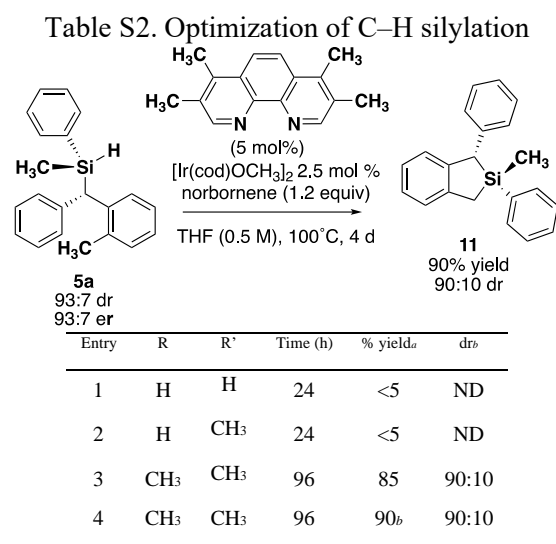

<sup>a</sup> Determined using <sup>1</sup>H NMR analysis using PhTMS as an internal standard, 0.1 mmol silane **5a**. <sup>b</sup> 0.33 mmol **5a**; isolated yield.

### IIIc. Optimization of dehydrocoupling of Silane 5a

Table S3. Optimization of dehydrocoupling

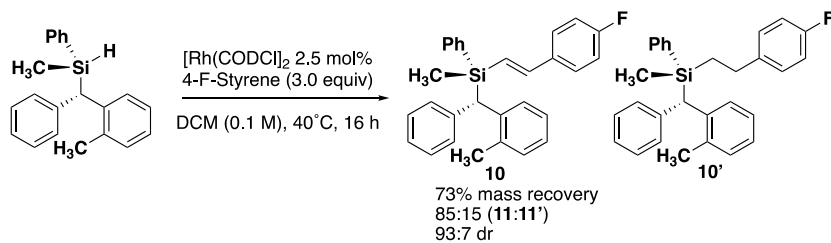

| entry | 5a (mg) | Catalyst, % loading            | solvent | time (h) | temp | equiv styrene | 5a consumption (%) <sub>a</sub> | 10:10' <sub>a</sub> | % Mass Recovery |
|-------|---------|--------------------------------|---------|----------|------|---------------|---------------------------------|---------------------|-----------------|
| 1     | 30      | Pt(dvs), 2.5                   | Pentane | 16 h     | rt   | 1.2           | > 95                            | -                   | ND              |
| 2     | 102     | Pt(dvs), 5                     | DCM     | 16 h     | rt   | 1.2           | > 95                            | -                   | ND              |
| 3     | 104     | Pt(dvs), 5                     | DCE     | 16 h     | 80   | 1.2           | > 95                            | -                   | ND              |
| 4     | 32      | Pt(dvs), 5                     | DCE     | 12 h     | 80   | 1.2           | > 95                            | -                   | ND              |
| 5     | 31      | Pt•NHCc, 10                    | DCE     | 12 h     | rt   | 1.2           | 10                              | -                   | ND              |
| 6     | 32      | PtO <sub>2</sub> , 10          | DCE     | 12 h     | rt   | 1.2           | > 95                            | -                   | ND              |
| 7     | 16      | [Rh(COD)Cl] <sub>2</sub> , 2.5 | DCM     | 16       | 40   | 1.2           | > 95                            | 85:15               | ND              |
| 8     | 102     | [Rh(COD)Cl] <sub>2</sub> , 2.5 | DCM     | 16       | 40   | 1.2           | > 95                            | 50:50               | 75              |
| 9     | 31      | [Rh(COD)Cl] <sub>2</sub> , 2.5 | DCE     | 16       | 80   | 3             | > 95                            | 75:25               | 80              |
| 10    | 103     | [Rh(COD)Cl] <sub>2</sub> , 2.5 | DCM     | 16       | 40   | 3             | > 95                            | 85:15               | 82              |
| 11    | 33      | [Rh(PPh <sub>3</sub> )Cl]      | DCM     | 16       | 40   | 3             | > 95                            | 75:25               | ND              |

*a, b* Determined using <sup>1</sup>H NMR Spectroscopy. *c* Weight percent used



### III.d. Determination of absolute configuration

Based on the results of the Tamao-Fleming oxidation (*vide infra*), the *S* configuration is assigned to the chiral carbon formed in the reaction after HPLC analysis compared to previously reported traces.<sup>10</sup>

For the assigning stereochemistry at silicon, a <sup>1</sup>H NOESY experiment was conducted on **11**, which was synthesized in 90:10 dr. Assuming retention of stereochemistry during the Si-H insertion step,<sup>11,12</sup> NOE transfer between the methyl group and benzhydryl proton indicates a *cis* relationship, thereby assigning an *S* configuration to the silicon for the insertion product.

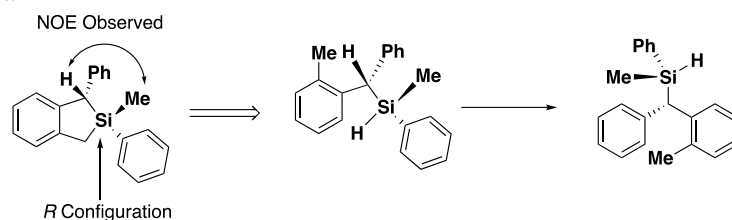

Figure S3. Reasoning for absolute configuration

The stereochemical outcome is applied to all other substrates based on analogy.

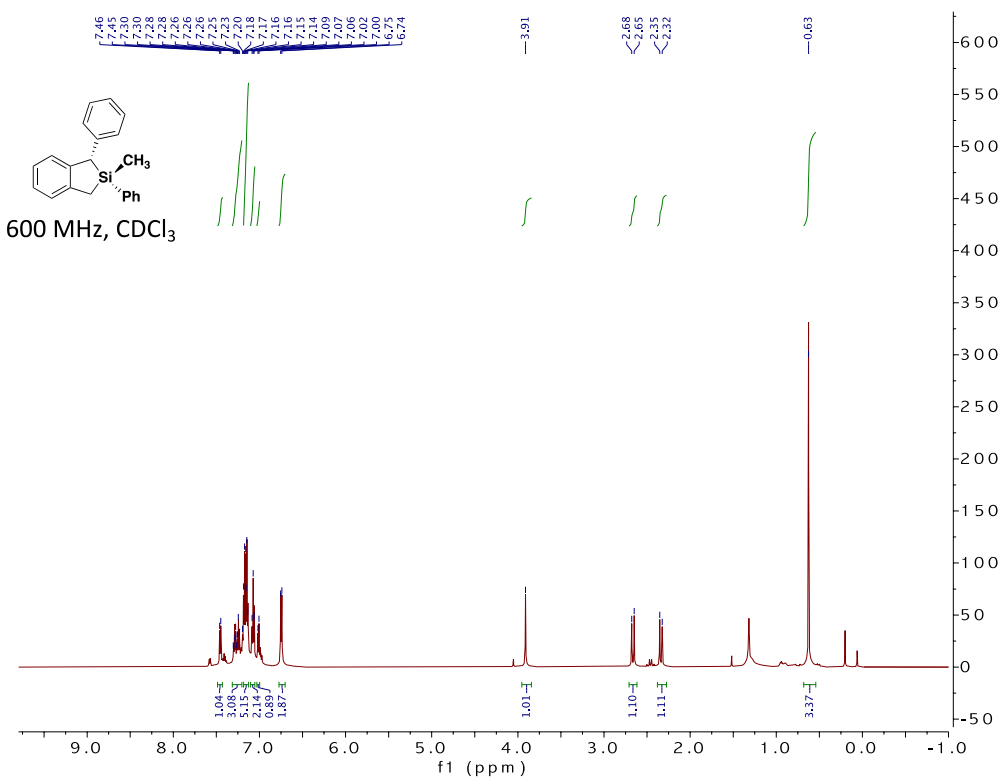

Figure S4. <sup>1</sup>H spectrum of **11**.

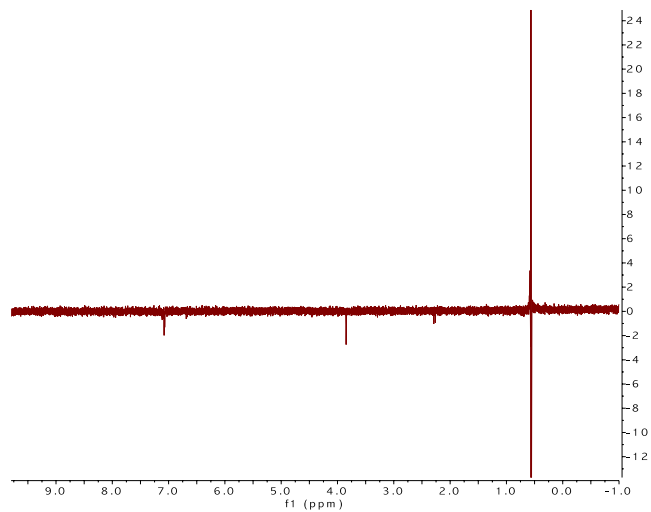

**Figure S5.**  $^1\text{H}$  NOESY experiment after Si-CH<sub>3</sub> irradiation. Transfer was observed to the benzhydryl peak at ~3.8 ppm

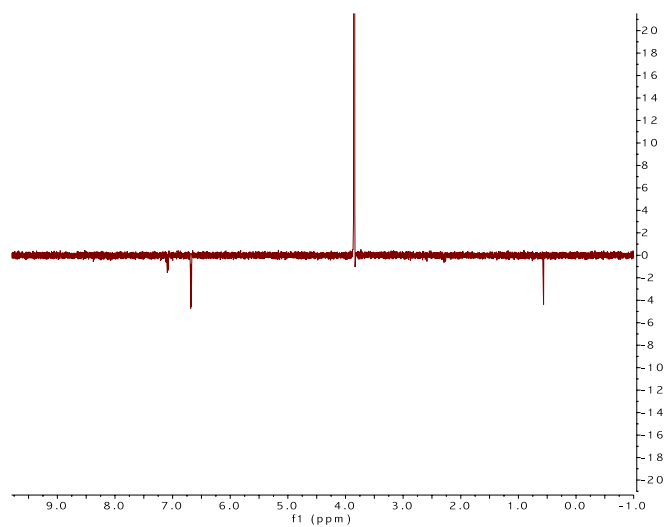

**Figure S6.**  $^1\text{H}$  NOESY experiment after benzhydryl C-H irradiation. Transfer was observed to the Si-CH<sub>3</sub> irradiation at ~0.5 ppm.

#### IV. Procedure for *in situ* ReactIR Analysis (Figure 2)

A 5-mL microwave reaction vial charged with stir bar, 4 Å MS (100 mg), then flame-dried and cooled under vacuum (>1 torr). After cooling, the vial was sealed, and PhMe (3mL) was added. A hole was punctured using a spatula, then quickly fitted to the ReactIR probe for background scans. The diazo was added as a solution (44.0 mg in 1.5 mL PhMe), and more background scans were taken to identify the diazo on the IR spectrum (2000-2100  $\text{cm}^{-1}$ ).  $\text{Rh}_2(\text{S-TCPTTL})_4$  was added as a solution in PhMe (0.5 mL of 0.3 mg/mL solution), and the disappearance of diazo **2a** or **3a** was monitored to determine a 1<sup>st</sup> order rate constant ( $k$ ).

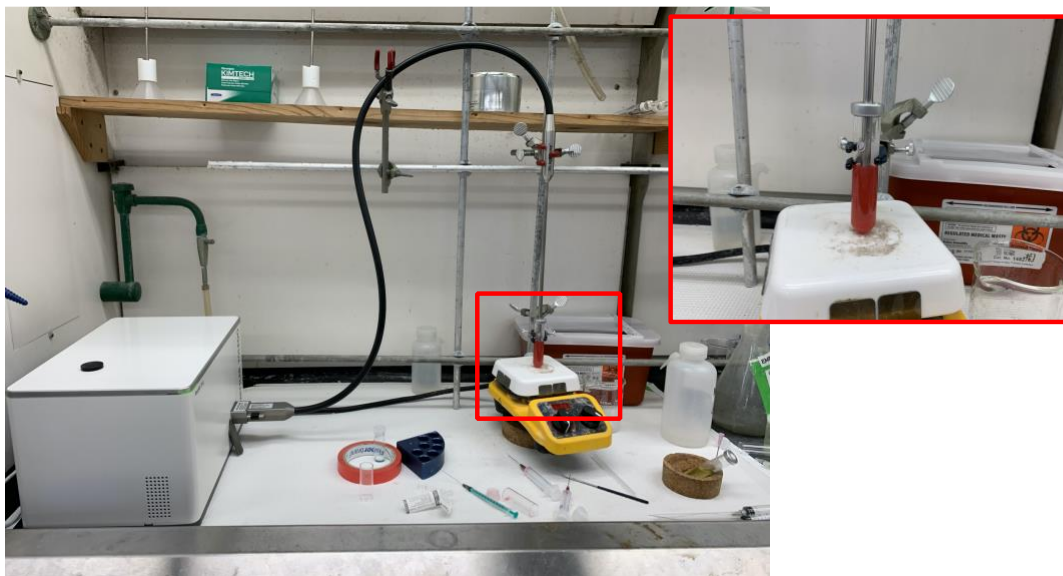

**Figure S7.** Example of ReactIR setup used for kinetic analysis.

The disappearance of diazo compounds **2a** and **3a** was monitored at 2041  $\text{cm}^{-1}$  and the trend data was transferred to Microsoft Excel for analysis. The values on the x-axis were manipulated to reflect the total number of minutes after addition of diazo for determination of rate constants. The values on the Y-axis were calculated to conversion by dividing by the maximum absorbance seen. The initial point used for 1<sup>st</sup> order rate constant determination was set to when  $\text{Rh}_2(\text{S-TCPTTL})_4$  was added to the reaction vial. For the determination of reaction order, and  $R_2$  value, the final point was identified when the concentration plateaued. The reactions were then filtered through a celite plug, and azines **7** and **8** were characterized by NMR. NMR yields using Ph-TMS were >90% for all trials. We then assumed the relative rates of diazo consumption were equivalent to the relative rates of azine formation.

## Trial 1

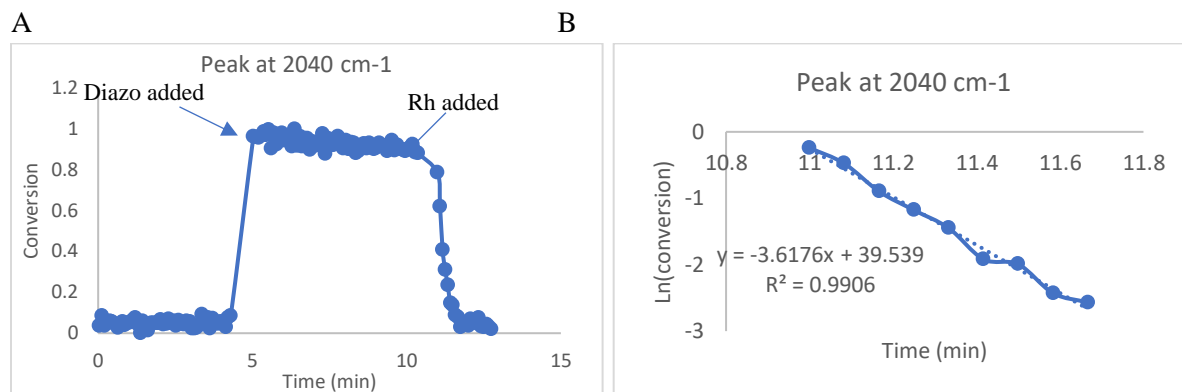

**Figure S8.** A: Data graphed for reaction with **2a** catalyzed by Rh<sub>2</sub>(S-TCPTTL)<sub>4</sub>: A) Graph of conversion vs. time. B) Graph of ln[conv] vs. time once catalyst was added.

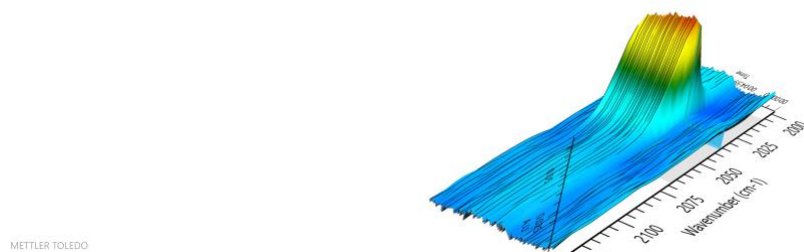

**Figure S9.** ReactIR surface plot for trial 1

## Trial 2

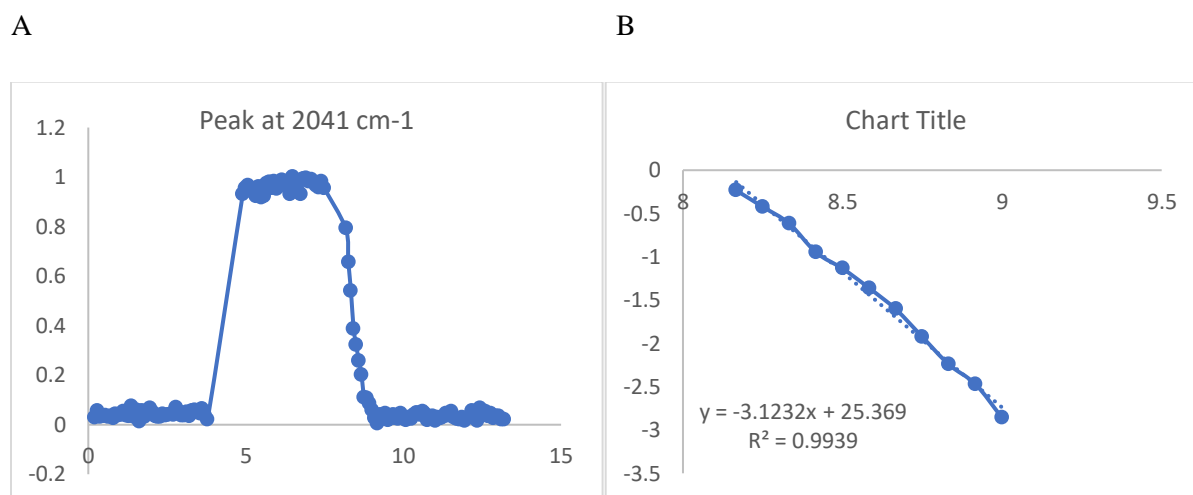

**Figure S10.** A: Data graphed for reaction with diazo compound **3a** catalyzed by Rh<sub>2</sub>(S-TCPTTL)<sub>4</sub>: A) Graph of conversion vs. time. B) Graph of ln[conv] vs. time once catalyst was added.

Trial 1

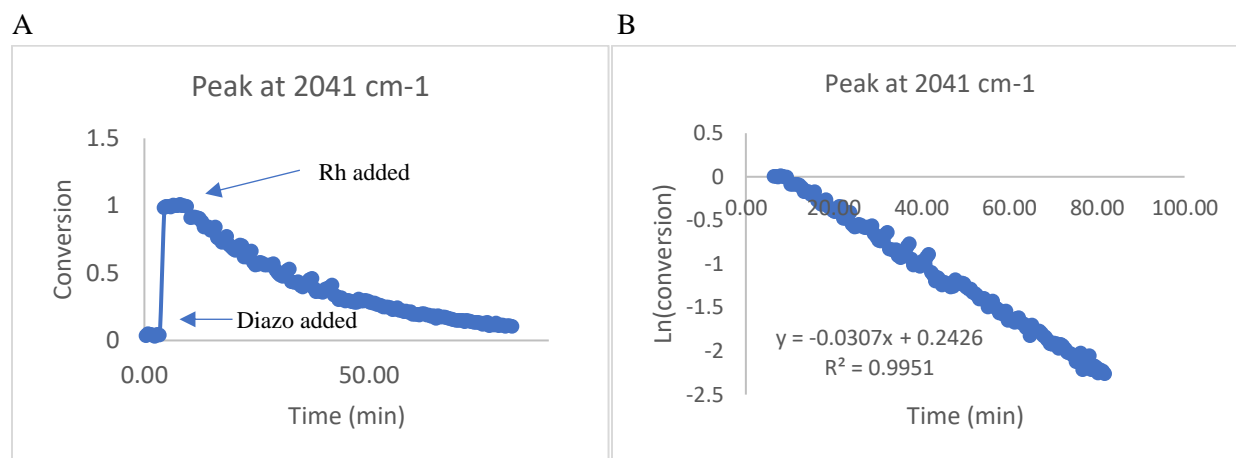

**Figure S11.** A: Data graphed for reaction with diazo compound **3a** catalyzed by Rh<sub>2</sub>(S-TCPTTL)<sub>4</sub>: A) Graph of conversion vs. time. B) Graph of ln[conv] vs. time once catalyst was added.

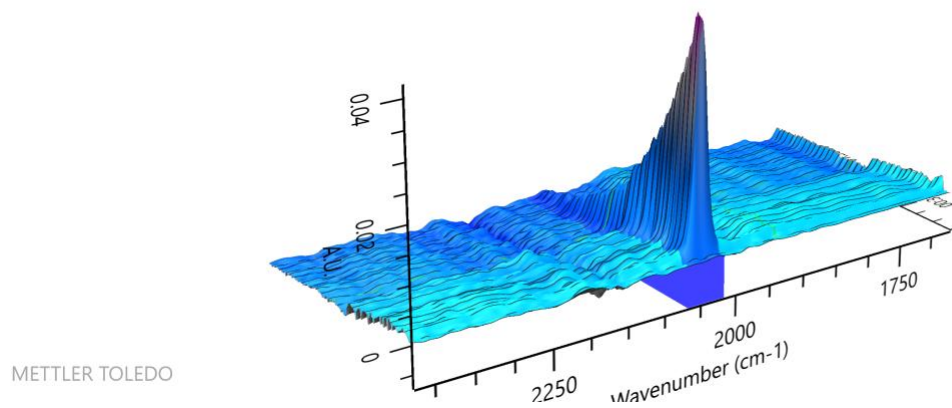

**Figure S12.** ReactIR surface plot for trial 1

Trial 2

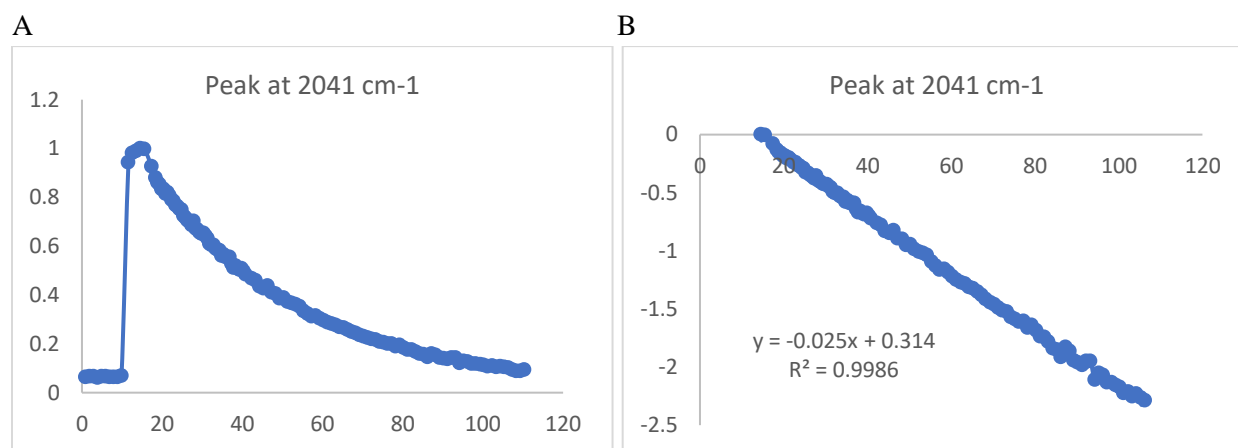

**Figure S13.** A: Data graphed for reaction with diazo compound **3a** catalyzed by  $\text{Rh}_2(\text{S-TCPTTL})_4$ : A) Graph of conversion vs. time. B) Graph of  $\ln[\text{conv}]$  vs. time once catalyst was added.

Based on the data observed,  $k_{\text{rel}} = k_{2a}/k_{3a} = 117.8$  for trial 1 and 127.2 for trial 2.

## V. Procedure for kinetic isotope effect (Figure 2)

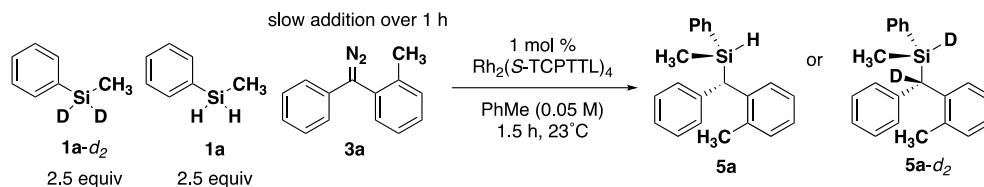

A 8 mL reaction vial equipped with stir bar and 100 mg 4Å molecular sieves was heated under flame and dried under high vacuum (>1 torr). After the vial cooled to room temperature, it was purged with argon, followed by addition of  $\text{Rh}_2(\text{S-TCPTTL})_4$  (0.002 mmol, 3.6 mg) and silane **1a** (1 mmol, 61 mg) and silane **1a-d<sub>2</sub>** (0.5 mmol, 61 mg). The vial was re-purged with argon, and 2 mL of PhMe was added. Diazo compound **3a** (0.2 mmol, 39.0 mg) was weighed into a separate flame-dried vial, and 2 mL of PhMe was added, then drawn into a syringe. Using a long needle, the syringe was placed on a syringe pump with the needle *in* the stirring solution. The syringe pump was programed to add the solution over a period of 1 h at room temperature.

Thirty minutes after diazo addition, the solution was diluted with 5 mL of hexane, and filtered through celite, and concentrated *in vacuo*. The crude mixture was diluted in hexanes and ran through a short silica plug (4 cm in a Pasteur pipette) to remove catalyst, and concentrated *in vacuo*. The product was then purified using column chromatography (dry loaded sample in silica, 98:2 hexanes/DCM) to furnish a mixture of silane **5a** and **5a-d<sub>2</sub>** as an oil.

The kinetic isotope effect was determined using an integration ratio of the benzhydryl resonance for the major diastereomer present at 3.78. ppm and both benzyl resonances observed at 2.25 ppm (major diastereomer) using Equation 1:

$$KIE = \frac{I_A}{\frac{I_B}{3} - I_A} \quad (\text{Eq. 1})$$

Where  $I_A$  is the integral of the benzhydryl resonance, and  $I_B$  is the integral of both benzyl resonances. This equation takes into account both stoichiometry and the combined integration of both **5a** and **5a-d<sub>2</sub>** at 2.25 ppm.

### Trial 1

$$I_A = 1.00$$

$$I_B = 4.91$$

$$KIE = 1.57$$

### Trial 2

$$I_A = 1.0$$

$$I_B = 4.90$$

$$KIE = 1.58$$

Based on the trials 1 and 2, the calculated KIE is 1.575, which is rounded to 1.6.

$^1\text{H}$  NMR,  $\text{CDCl}_3$ , 600 MHz

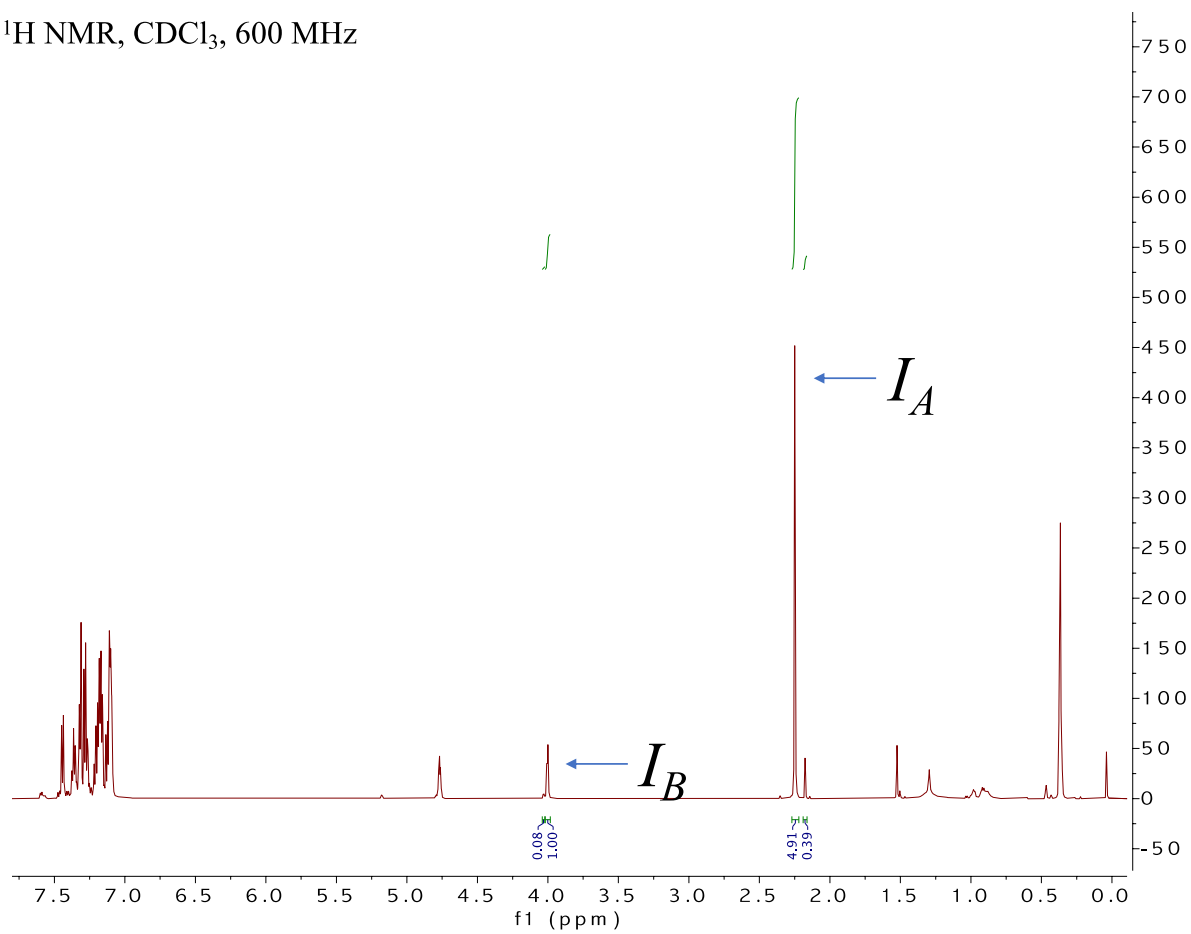

**Figure S14.**  $^1\text{H}$  NMR of **5a** and **5a-d<sub>2</sub>** mixture, with  $I_A$  and  $I_B$  shown.



## VI. Characterization Data

### Silanes:

#### methyl(phenyl)silane-*d*<sub>2</sub> (1a-*d*<sub>2</sub>)

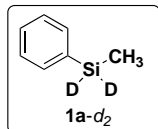

Made using previously reported procedures.<sup>13</sup> Spectrum matches with previous report.<sup>13</sup>

<sup>1</sup>H NMR (600 MHz, CDCl<sub>3</sub>) δ 7.59 (m, 2H), 7.45 – 7.35 (m, 3H), 0.43 (s, 3H).

#### (4-fluorophenyl)(methyl)silane (1b)

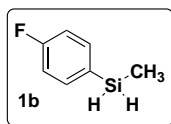

Synthesized according to the general procedure B for silane formation using 1-bromo-4-fluorobenzene (1.88 mL, 15.0 mmol), *n*-BuLi (15.0 mmol, 6 mL solution in hexanes) and dichloromethylsilane (1.09 mL, 15.0 mmol) and purified using bulb-to-bulb distillation to give a clear liquid that can be isolated in 45% yield (1.15 g, 6.75 mmol) over 2 steps from addition of the chlorosilane.

<sup>1</sup>H NMR (600 MHz, C<sub>6</sub>D<sub>6</sub>) δ 7.19 – 7.16 (m, 1H), 6.79 (t, *J* = 8.7 Hz, 1H), 4.37 (q, *J* = 4.3 Hz, 1H), 0.10 (t, *J* = 4.3 Hz, 1H). <sup>13</sup>C NMR (101 MHz, CDCl<sub>3</sub>) δ 164.2 (d, *J* = 248.7 Hz), 137.0 (d, *J* = 7.6 Hz), 128.9 (d, *J* = 3.8 Hz), 115.4 (d, *J* = 19.9 Hz), -7.3. <sup>19</sup>F NMR (376 MHz, Chloroform-*d*) δ -111.16. <sup>29</sup>Si NMR (119 MHz, CDCl<sub>3</sub>) δ -35.8

#### (4-methoxyphenyl)(methyl)silane (1c)

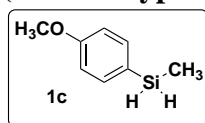

Synthesized according to the general procedure for silane formation using 4-bromoanisole (1.88 mL, 15.0 mmol) and dichloromethylsilane (1.09 mL, 15.0 mmol) and purified using column chromatography (hexanes) to give a clear liquid that can be isolated in 81% yield (1.85 g, 12.2 mmol) over 2 steps from addition of the chlorosilane.

<sup>1</sup>H NMR (600 MHz, C<sub>6</sub>D<sub>6</sub>) δ 7.41 (d, *J* = 8.1 Hz, 2H), 6.80 (d, *J* = 8.0 Hz, 2H), 4.55 (q, *J* = 4.0 Hz, 2H), 3.27 (s, 3H), 0.23 (t, *J* = 4.1 Hz, 3H). <sup>13</sup>C NMR (100 MHz, CDCl<sub>3</sub>) δ 161.0, 136.5, 124.2, 114.0, 55.2, -7.2. <sup>29</sup>Si NMR (119 MHz, CDCl<sub>3</sub>) δ -36.4.

#### Methyl(*p*-tolyl)silane (1d)

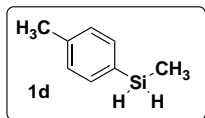

Synthesized according to the general procedure A for silane formation using 1-bromo-4-methylbenzene (1.85 mL, 15.0 mmol) and dichloromethylsilane (1.09 mL, 15.0 mmol) and purified using bulb-to-bulb distillation to give a clear liquid that can be isolated in 63% yield (1.29 g) over 2 steps from the addition of the chlorosilane.

<sup>1</sup>H NMR (600 MHz, C<sub>6</sub>D<sub>6</sub>) δ 7.42 (d, *J* = 7.5 Hz, 2H), 7.01 (d, *J* = 7.5 Hz, 2H), 4.53 (q, *J* = 4.1 Hz, 2H), 2.09 (s, 3H), 0.22 (t, *J* = 4.1 Hz, 3H). <sup>13</sup>C NMR (101 MHz, CDCl<sub>3</sub>) δ 139.6, 135.0, 129.8, 129.0, 21.6, -7.4. <sup>29</sup>Si NMR (119 MHz, CDCl<sub>3</sub>) δ -36.1.

### Methyl(naphthalen-2-yl)silane (1e)

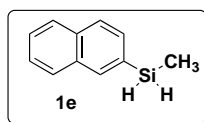

Synthesized according to the general procedure A for silane formation using 2-bromonaphthalene (3.26 g) in 5 mL THF and dichloromethylsilane (1.09 mL, 15.0 mmol) and purified using bulb-to-bulb distillation via kugelrohr (150 °C, 20 torr) followed by sublimation (70 °C, 760 torr) to give a clear liquid that can be isolated in 50% yield (1.29 g, 7.5 mmol, based on Si) over 2 steps from the addition of chlorosilane.

<sup>1</sup>H NMR (600 MHz, C<sub>6</sub>D<sub>6</sub>) δ 7.99 (s, 1H), 7.61 (t, *J* = 7.2 Hz, 3H), 7.49 (d, *J* = 8.1 Hz, 2H), 7.30 – 7.22 (m, 2H), 4.60 (q, *J* = 4.3 Hz, 0H), 0.25 (t, *J* = 4.2 Hz, 1H). <sup>13</sup>C NMR (101 MHz, CDCl<sub>3</sub>) δ 136.0, 134.0, 133.1, 131.0, 130.9, 128.1, 127.9, 127.4, 126.7, 126.2, -7.4. <sup>29</sup>Si NMR (119 MHz, CDCl<sub>3</sub>) δ -35.4.

### Methyl(naphthalen-1-yl)silane (1f)

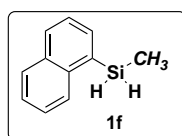

Synthesized according to the general procedure B for silane formation using 1-bromonaphthalene (2.10 mL, 15.0 mmol), *n*-BuLi (15.0 mmol, 6 mL solution in hexanes) and dichloromethylsilane (1.09 mL, 15.0 mmol) and purified using bulb-to-bulb distillation via kugelrohr (150 °C, 20 torr) followed by sublimation (70 °C, 760 torr) to give a clear liquid that can be isolated in 50% yield (1.29 g, 7.5 mmol) over 2 steps from addition of the chlorosilane.

<sup>1</sup>H NMR (600 MHz, CDCl<sub>3</sub>) δ 8.04 (d, *J* = 8.2 Hz, 1H), 7.64 – 7.54 (m, 3H), 7.29 – 7.23 (m, 1H), 7.24 – 7.19 (m, 1H), 7.19 – 7.14 (m, 1H), 4.75 (q, *J* = 4.2 Hz, 2H), 0.24 (t, *J* = 4.2 Hz, 3H). <sup>13</sup>C NMR (151 MHz, CDCl<sub>3</sub>) δ 137.2, 135.3, 133.2, 132.2, 130.6, 129.0, 127.7, 126.3, 125.9, 125.4, -7.2. <sup>29</sup>Si NMR (119 MHz, CDCl<sub>3</sub>) δ -38.6.

### (4-fluoronaphthalen-1-yl)(methyl)silane (1g)

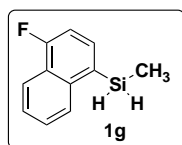

Synthesized according to the general procedure for silane formation using 4-fluoro-1-bromonaphthalene (3.38 g, 15.0 mmol in 5 mL THF) and dichloromethylsilane (1.09 mL, 15.0 mmol) and purified using bulb-to-bulb distillation via kugelrohr (150 °C, 50 torr for 30 min then 105 °C, 10 torr) to give a clear liquid that can be isolated in 21% yield (597.0 mg, 3.1 mmol, based off Si) over 2 steps from addition of the chlorosilane.

<sup>1</sup>H NMR (600 MHz, CDCl<sub>3</sub>) δ 8.18 (d, *J* = 8.0 Hz, 1H), 8.05 (d, *J* = 8.0 Hz, 1H), 7.72 (t, *J* = 6.7 Hz, 1H), 7.60 (dt, *J* = 16.1, 7.0 Hz, 2H), 7.18 – 7.12 (m, 1H), 4.65 (q, *J* = 4.2, 3.7 Hz, 2H), 0.54 (t, *J* = 3.9 Hz, 3H). <sup>13</sup>C NMR (150 MHz, CDCl<sub>3</sub>) δ 160.78 (d, *J*<sub>CF</sub> = 255.0 Hz), 138.82 (d, *J*<sub>CCCF</sub> = 4.4 Hz), 135.28 (d, *J*<sub>CCF</sub> = 8.3 Hz), 127.80 (d, *J*<sub>CCCF</sub> = 4.8 Hz), 127.57 (d, *J* = 3.1 Hz), 127.32, 126.21 (d, *J*<sub>CCCCF</sub> = 1.7 Hz), 121.40 (d, *J*<sub>CCCF</sub> = 6.1 Hz), 109.17 (d, *J*<sub>CCF</sub> = 18.6 Hz), -7.19. <sup>19</sup>F NMR (376 MHz, CDCl<sub>3</sub>) δ -120.24. <sup>29</sup>Si NMR (119 MHz, CDCl<sub>3</sub>) δ -35.8

### Methyl(*o*-tolyl)silane (1h)

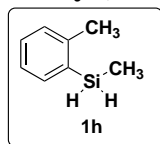

Synthesized according to the general procedure for silane formation using 2-bromotoluene (1.80 mL, 15.0 mmol) and dichloromethylsilane (1.09 mL, 15.0 mmol) and purified using column chromatography (hexanes) to give a clear liquid that can be isolated in 72% yield (1.47g, 10.8 mmol) over 2 steps from the addition of the chlorosilane. Matches with previously reported spectra.<sup>14</sup>

<sup>1</sup>H NMR (600 MHz, CDCl<sub>3</sub>) δ 7.52 (d, *J* = 7.3 Hz, 1H), 7.32 (t, *J* = 7.5 Hz, 1H), 7.21 – 7.16 (m, 2H), 4.37 (q, *J* = 4.2 Hz, 2H), 2.46 (s, 3H), 0.43 (t, *J* = 4.2 Hz, 3H).

### Mesityl(methyl)silane (1i)

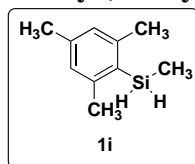

Synthesized according to the general procedure for silane formation using 2-bromomesitylene (2.30 mL, 15 mmol) and dichloromethylsilane (1.09 mL, 15.0 mmol) and purified using column chromatography (hexanes) to give a clear liquid that can be isolated in 87% yield (2.14 g, 13.0 mmol) over 2 steps from addition of the chlorosilane. Spectral data matches previously reported values.<sup>14</sup>

<sup>1</sup>H NMR (400 MHz, CDCl<sub>3</sub>) δ 6.88 (s, 2H), 4.45 (q, *J* = 4.2 Hz, 2H), 2.47 (s, 6H), 2.30 (s, 3H), 0.36 (t, *J* = 4.2 Hz, 3H).

### Isobutyl(naphthalen-1-yl)silane (1j)

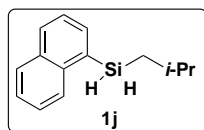

Synthesized according to Method C for silane formation using 1-bromonaphthalene (2.10 mL, 15.0 mmol), *n*-BuLi (15.0 mmol, 6 mL solution in hexanes), and dichloroisobutylsilane (2.28 mL, 15.0 mmol) and purified using bulb-to-bulb distillation via kugelrohr (150 °C, 20 torr) followed by sublimation (70 °C, 760 torr) that can be isolated as a clear liquid in 21% yield (675.0 mg, 3.2 mmol, based of Si) over 2 steps from addition of the chlorosilane.

<sup>1</sup>H NMR (600 MHz, C<sub>6</sub>D<sub>6</sub>) δ 8.14 (m, 1H), 7.74 (m, 1H), 7.65 (m, 2H), 7.33 (m, 1H), 7.27 (m, 1H), 7.23 (m, 1H), 4.83 (t, *J* = 3.8 Hz, 2H), 1.76 (hept, *J* = 6.7 Hz, 1H), 0.94 (dd, *J* = 7.1, 3.7 Hz, 2H), 0.91 (d, *J* = 6.6 Hz, 6H).<sup>13</sup>C NMR (151 MHz, CDCl<sub>3</sub>) δ 137.37, 135.85, 133.23, 131.87, 130.53, 129.04, 127.92, 126.31, 125.86, 125.39, 26.09, 25.62, 20.80. <sup>29</sup>Si NMR (79 MHz, CDCl<sub>3</sub>) δ -36.0.

### Isobutyl(phenyl)silane (1k)

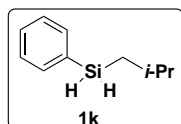

Synthesized according to method C for silane formation using bromobenzene (1.58 mL, 15.0 mmol) and dichloroisobutylsilane (2.28 mL, 15.0 mmol) and purified using bulb-to-bulb distillation (150 °C, 100 torr) to give a liquid that can be isolated as a clear liquid in 41% yield (1.01 g, 6.15 mmol) over 2 steps from addition of the chlorosilane.

<sup>1</sup>H NMR (600 MHz, CDCl<sub>3</sub>) δ 7.57 (m, 2H), 7.36 (m, 3H), 4.31 (t, *J* = 3.9 Hz, 2H), 1.85 (dh, *J* = 13.4, 6.7 Hz, 1H), 0.99 (d, *J* = 6.6 Hz, 6H), 0.95 (dt, *J* = 7.5, 3.9 Hz, 2H). <sup>13</sup>C NMR (151 MHz, CDCl<sub>3</sub>) δ 135.35, 133.10, 129.58, 128.09, 25.75, 25.62, 20.61. <sup>29</sup>Si NMR (119 MHz, CDCl<sub>3</sub>) δ -33.8.

### Neopentyl(phenyl)silane (1l)

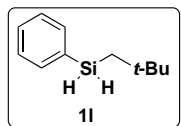

Synthesized using method H. Isolated as a clear liquid in 25 % yield (231 mg, 1.3 mmol).

<sup>1</sup>H NMR (600 MHz, CDCl<sub>3</sub>) δ 7.57 (d, *J* = 6.4 Hz, 1H), 7.36 (hept, *J* = 6.7, 6.2 Hz, 2H), 4.34 (t, *J* = 4.2 Hz, 2H), 1.08 (t, *J* = 4.2 Hz, 2H), 1.04 (s, 9H). <sup>13</sup>C NMR (151 MHz, CDCl<sub>3</sub>) δ 135.35, 133.53, 129.51, 128.08, 33.07, 32.31, 27.09. <sup>29</sup>Si NMR (79 MHz, CDCl<sub>3</sub>) δ -37.8.

### Cyclohexylphenylsilane (1m)

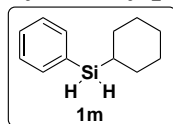

Made using previously reported procedures.<sup>15</sup> Spectra matches with previous report.

<sup>1</sup>H NMR (600 MHz, CDCl<sub>3</sub>) δ 7.55 (dt, *J* = 6.5, 1.5 Hz, 2H), 7.41 – 7.37 (m, 1H), 7.37 – 7.33 (m, 2H), 4.16 (d, *J* = 3.0 Hz, 2H), 1.83 – 1.58 (m, 7H), 1.22 – 0.91 (m, 4H).

### 1,1,1-Triethyl-3-phenyldisiloxane (1n)

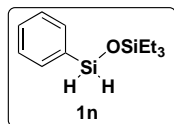

Made using previously reported procedure.<sup>3</sup> Spectra matches with previous report.

<sup>1</sup>H NMR (400 MHz, CDCl<sub>3</sub>) δ 7.69 – 7.60 (m, 2H), 7.52 – 7.35 (m, 3H), 5.14 (s, 1H), 0.96 (t, *J* = 8.0 Hz, 9H), 0.60 (q, *J* = 8.0 Hz, 6H).

### Diazo compounds:

#### Diphenyldiazomethane (2a)

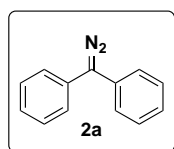

Synthesized using previously reported procedures. Spectrum matches previous report.<sup>7</sup>

<sup>1</sup>H NMR (600 MHz, CDCl<sub>3</sub>) δ 7.39 (t, *J* = 7.7 Hz, 3H), 7.30 (d, *J* = 8.4 Hz, 2H), 7.19 (t, *J* = 7.4 Hz, 1H).

#### 4,4'-(diazomethylene)bis(methoxybenzene) (2b)

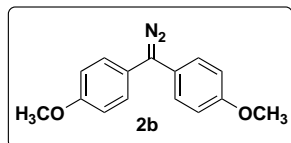

Made using previously published procedures. Spectrum matches previous report.<sup>7</sup>

<sup>1</sup>H NMR (600 MHz, CDCl<sub>3</sub>) δ 7.18 (d, *J* = 8.8 Hz, 4H), 6.94 (d, *J* = 8.8 Hz, 4H), 3.82 (s, 3H).

#### 4,4'-(diazomethylene)bis(chlorobenzene) (2c)

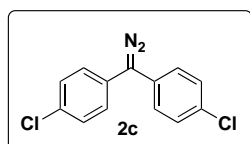

Made using previously published procedures. Spectrum matches previous report.<sup>7</sup>

<sup>1</sup>H NMR (400 MHz, CDCl<sub>3</sub>) δ 7.36 (d, *J* = 8.8 Hz, 4H), 7.18 (d, *J* = 8.7 Hz, 4H).

#### Phenyl(*o*-tolyl)diazomethane (3a)

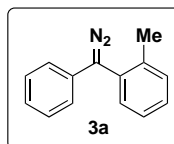

Synthesized using procedure A for diazo formation using 2-methylbenzophenone (0.36 mL, 2.0 mmol) to give a purple liquid that can be isolated in 60% yield (243.0 mg) over 2 steps.

<sup>1</sup>H NMR (400 MHz, CDCl<sub>3</sub>) δ 7.43 (d, *J* = 7.1 Hz, 1H), 7.31 (m, 5H), 7.07 (t, *J* = 7.3 Hz, 2H), 6.97 (d, *J* = 7.9 Hz, 1H), 2.28 (s, 3H). <sup>13</sup>C NMR (151 MHz, CDCl<sub>3</sub>) δ 138.5, 131.5, 131.25, 131.0, 129.1, 128.7, 127.2, 126.7, 124.1, 122.6, 20.6. APCI *m/z* calc for C<sub>14</sub>H<sub>12</sub>N<sub>2</sub> [M + H – N<sub>2</sub>]

### Phenyl(*o*-methoxyphenyl)diazomethane (3b)

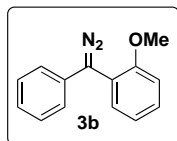

Synthesized using procedure A using 2-methoxybenzophenone (457.0 mg, 2.2 mmol) to give a purple oil that can be isolated in 68% yield (761.9 mg) over 2 steps.

$^1\text{H}$  NMR (600 MHz,  $\text{CDCl}_3$ )  $\delta$  7.37 (d,  $J = 7.6$  Hz, 1H), 7.31 (q,  $J = 6.9$  Hz, 3H), 7.08 (m, 3H), 7.04 – 6.96 (m, 2H), 3.86 (s, 3H).  $^{13}\text{C}$  NMR (101 MHz,  $\text{CDCl}_3$ )  $\delta$  157.0, 131.6, 130.1, 129.0, 124.2, 123.2, 121.2, 117.2, 111.7, 55.7. APCI  $m/z$  calc for  $\text{C}_{14}\text{H}_{12}\text{N}_2\text{O}$  [ $\text{M} + \text{H} - \text{N}_2$ ] $^+$ . 197.1. Found 196.5.

### Phenyl(*o*-trifluoromethylphenyl)diazomethane (3c)

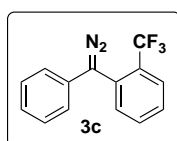

Synthesized using method B to give a red liquid that can be isolated in 44% yield (461.5 mg) over 2 steps.

$^1\text{H}$  NMR (400 MHz,  $\text{CDCl}_3$ )  $\delta$  7.83 (d,  $J = 7.9$  Hz, 1H), 7.59 (ddt,  $J = 23.5, 15.2, 7.6$  Hz, 3H), 7.31 (t,  $J = 7.7$  Hz, 2H), 7.08 (t,  $J = 7.4$  Hz, 1H), 6.86 (d,  $J = 7.9$  Hz, 2H).  $^{13}\text{C}$  NMR (101 MHz,  $\text{CDCl}_3$ )  $\delta$  134.3, 132.6, 131.1 (q,  $J_{\text{CCF}} = 30$  Hz), 131.6, 129.2, 129.1, 127.4 (q,  $J_{\text{CCCF}} = 5.4$  Hz), 127.0, 124.3, 124.0 (q,  $J_{\text{CF}} = 275$  Hz) 122.5.  $^{19}\text{F}$  NMR (376 MHz,  $\text{CDCl}_3$ )  $\delta$  -61.93. APCI  $m/z$  calc for  $\text{C}_{14}\text{H}_9\text{F}_3\text{N}_2$  [ $\text{M} + \text{H} - \text{N}_2$ ] $^+$ . 235.1. Found 234.4.

### 1-chloro-2-(diazomethyl)benzene (3d)

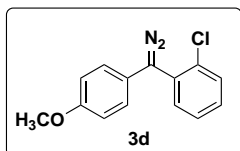

Synthesized according to previous procedures and isolated as a red oil.<sup>16</sup> Spectrum matches previous report.<sup>16</sup>

$^1\text{H}$  NMR (600 MHz,  $\text{CDCl}_3$ )  $\delta$  7.48 (d,  $J = 7.8$  Hz, 1H), 7.42 (d,  $J = 5.9$  Hz, 1H), 7.30 (d,  $J = 7.5$  Hz, 1H), 7.27 (m,  $J = 2\text{H}$ ), 6.96 (d,  $J = 7.0$  Hz, 2H), 6.91 (d,  $J = 9.0$  Hz, 3H), 3.80 (s, 1H).

### Phenyl(1-naphthyl)diazomethane (3e)

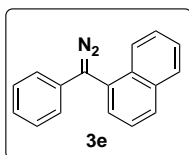

Synthesized according to the general procedure for diazo formation using 1-naphthylphenylketone (1.340 g, 5.7 mmol) to give a purple solid that can be isolated in 68% yield (828.9 mg) over 2 steps.

$^1\text{H}$  NMR (600 MHz,  $\text{CDCl}_3$ )  $\delta$  7.97 – 7.90 (m, 2H), 7.88 (d,  $J = 8.2$  Hz, 1H), 7.69 (d,  $J = 6.7$  Hz, 1H), 7.56 (dt,  $J = 21.5, 7.3$  Hz, 2H), 7.49 (t,  $J = 7.4$  Hz, 1H), 7.31 (t,  $J = 7.1$  Hz, 2H), 7.08 (t,  $J = 7.1$  Hz, 1H), 6.97 (d,  $J = 7.5$  Hz, 2H).  $^{13}\text{C}$  NMR (151 MHz,  $\text{CDCl}_3$ )  $\delta$  134.5, 132.2, 131.9, 129.5, 129.3, 129.1, 128.9, 126.8, 126.5, 126.0, 125.6, 125.44, 124.2, 122.7. APCI  $m/z$  calc for  $\text{C}_{17}\text{H}_{12}\text{N}_2$  [ $\text{M} + \text{H} - \text{N}_2$ ] $^+$ . 217.1. Found 216.5.

## Insertion Products:

### (*S*)-benzhydryl(methyl)(phenyl)silane (**4a**)

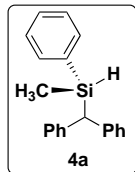

Synthesized using method F with diazo compound **2a** (1.0 mmol, 181.0 mg) in PhMe (20 mL total) to give a white solid in 78% yield (0.78 mmol, 225.0 mg). Enantiomeric ratio was determined by HPLC after hydrolysis with a Daicel CHIRALPAK® OD-H column (2% IPA/ hexanes), 1.0 mL/min.  $t_R$  (**4aa**) = 11.3 min,  $t_R$  (**4ab**) = 12.9 min, 82:18 er (Si-OH product). Absolute configuration was assigned to be (*S*) based on analogy to **5a**.

$^1\text{H}$  NMR (400 MHz,  $\text{CDCl}_3$ )  $\delta$  7.32 (m, 2H), 7.28 – 7.21 (m, 7H), 7.18 (m, 4H), 7.12 (m, 2H), 4.84 – 4.59 (m, 1H), 3.81 (d,  $J = 3.7$  Hz, 1H), 0.30 (d,  $J = 3.5$  Hz, 3H).  $^{13}\text{C}$  NMR (101 MHz,  $\text{CDCl}_3$ )  $\delta$  142.3, 142.1, 135.0, 134.8, 129.6, 129.1, 129.0, 128.6, 128.5, 127.8, 125.6, 125.6, 43.3, -5.9.  $^{29}\text{Si}$  NMR (79 MHz,  $\text{CDCl}_3$ )  $\delta$  -11.1. MALDI  $m/z$  calc for  $\text{C}_{20}\text{H}_{20}\text{Si}$  [ $\text{M} + \text{H}$ ] $^+$ . 289.141. Found 289.153.

### Racemic Standard for **4a**:

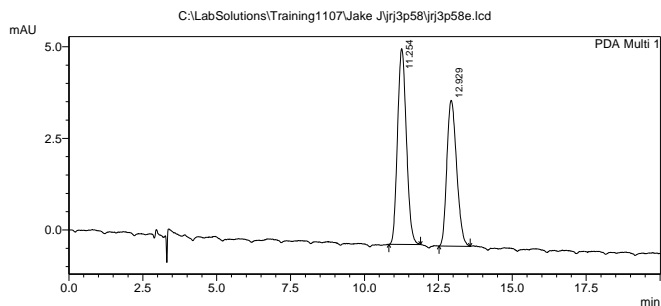

1 PDA Multi 1/320nm 4nm

< Peak Table >

| PeakTable C:\LabSolutions\Training\1107\Jake J\jrj3p58\jrj3p58e.lcd |           |        |        |         |          |
|---------------------------------------------------------------------|-----------|--------|--------|---------|----------|
| Peak#                                                               | Ret. Time | Area   | Height | Area %  | Height % |
| 1                                                                   | 11.254    | 111525 | 5344   | 54.926  | 57.328   |
| 2                                                                   | 12.929    | 91520  | 3978   | 45.074  | 42.672   |
| Total                                                               |           | 203045 | 9322   | 100.000 | 100.000  |

### Enantiomerically enriched (*S*) **4a** using *S*-TCPTTL:

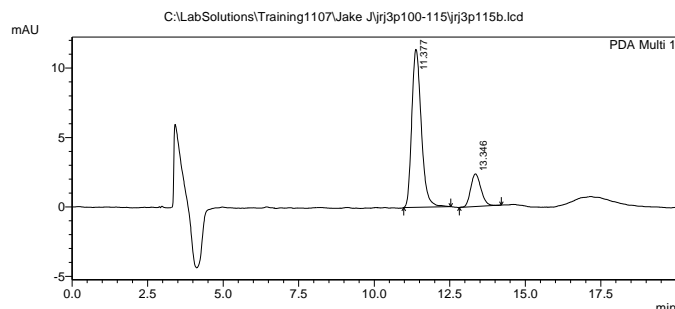

1 PDA Multi 1/265nm 4nm

< Peak Table >

| PeakTable C:\LabSolutions\Training\1107\Jake J\jrj3p100-115\jrj3p115b.lcd |           |        |        |         |          |
|---------------------------------------------------------------------------|-----------|--------|--------|---------|----------|
| Peak#                                                                     | Ret. Time | Area   | Height | Area %  | Height % |
| 1                                                                         | 11.377    | 249390 | 11382  | 81.855  | 82.869   |
| 2                                                                         | 13.346    | 55284  | 2353   | 18.145  | 17.131   |
| Total                                                                     |           | 304673 | 13735  | 100.000 | 100.000  |

### (S)-(bis(4-methoxyphenyl)methyl)(methyl)(phenyl)silane (**4b**)

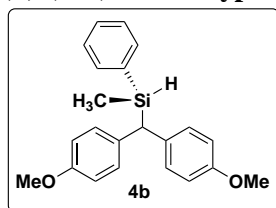

Synthesized using method F with diazo compound **2b** (0.2 mmol, 42.0 mg) to give a white solid in 45% yield (0.09 mmol, 31.3 mg). Enantiomeric ratio was determined by HPLC after hydrolysis with a Daicel CHIRALPAK® AS column (2% IPA/ hexanes), 1.0 mL/min.  $t_R$  (**4ba**) = 13.7 min,  $t_R$  (**4bb**) = 16.2 min, 81:19 er (Si-OH product). Absolute configuration was assigned to be (*S*) based on analogy to **5a**.

$^1\text{H}$  NMR (600 MHz,  $\text{C}_6\text{D}_6$ )  $\delta$  7.41 – 7.36 (m, 2H), 7.17 (m, 2H), 7.15 – 7.09 (m, 5H), 6.78 (d,  $J$  = 8.6 Hz, 2H), 6.73 (d,  $J$  = 8.7 Hz, 2H), 4.96 (p,  $J$  = 3.6 Hz, 1H), 3.72 (d,  $J$  = 3.9 Hz, 1H), 3.31 (s, 3H), 3.27 (s, 3H), 0.29 (d,  $J$  = 3.7 Hz, 3H).  $^{13}\text{C}$  NMR (101 MHz,  $\text{CDCl}_3$ )  $\delta$  157.6, 157.5, 135.1, 135.0, 134.8, 134.7, 129.9, 129.8, 129.56, 127.8, 114.0, 113.9, 55.4, 55.3, 40.9, -5.8. Did not ionize using ESI, MALDI or APCI.

### Racemic Standard for **4b**:

<Chromatogram>

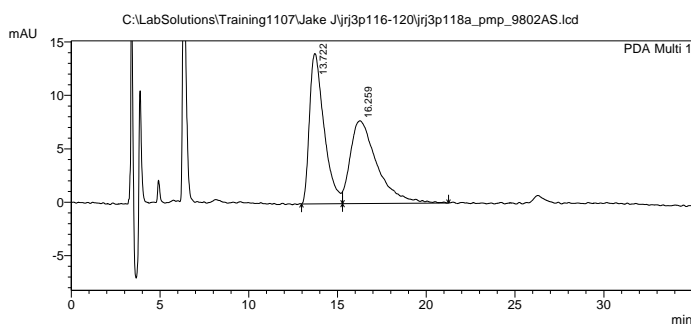

1 PDA Multi 1/233nm 4nm

< Peak Table >

PeakTable C:\LabSolutions\Training1107\Jake J\jrj3p116-120\jrj3p118a\_pmp\_9802AS.lcd

| Peak# | Ret. Time | Area    | Height | Area %  | Height % |
|-------|-----------|---------|--------|---------|----------|
| 1     | 13.722    | 805317  | 14077  | 49.974  | 64.499   |
| 2     | 16.259    | 806151  | 7748   | 50.026  | 35.501   |
| Total |           | 1611469 | 21826  | 100.000 | 100.000  |

### Spectrum index for racemic standard of **4b**:

Peak# : 1  
Retention Time : 13.722

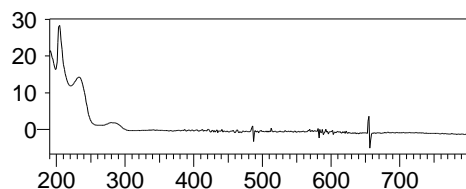

Peak# : 2  
Retention Time : 16.259

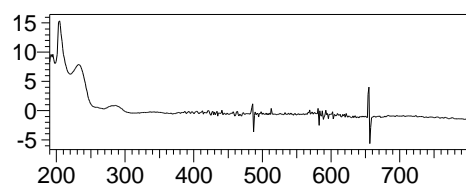

## Enantiomerically enriched (S) **4b** using S-TCPTTL:

<Chromatogram>

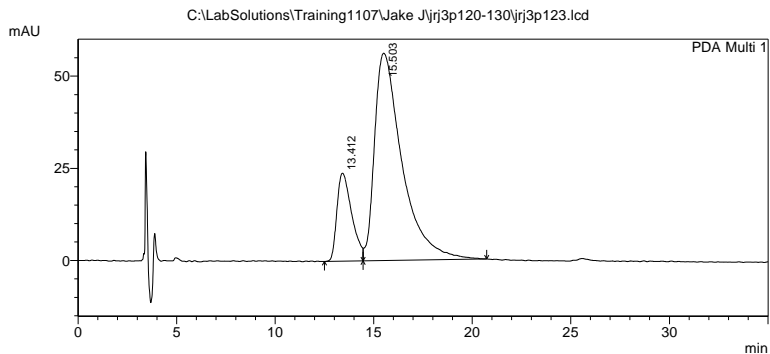

< Peak Table >

PeakTable C:\LabSolutions\Training1107\Jake J\jrj3p120-130\jrj3p123.lcd

| Peak# | Ret. Time | Area    | Height | Area %  | Height % |
|-------|-----------|---------|--------|---------|----------|
| 1     | 13.412    | 1249142 | 23869  | 18.595  | 29.783   |
| 2     | 15.503    | 5468390 | 56276  | 81.405  | 70.217   |
| Total |           | 6717532 | 80145  | 100.000 | 100.000  |

## Spectrum index for enantioenriched sample of **4b**:

Peak# : 1  
Retention Time : 13.722

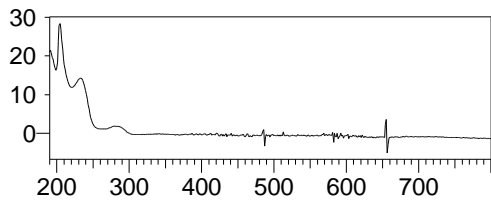

Peak# : 2  
Retention Time : 16.259

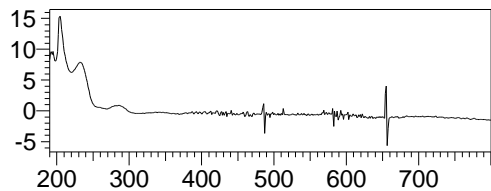

Spectrum indices between racemic standard and enantioenriched are identical, indicating the peaks are identical despite slightly different retention times.



### (S)-(bis(4-chlorophenyl)methyl)(methyl)(phenyl)silane (**4c**)

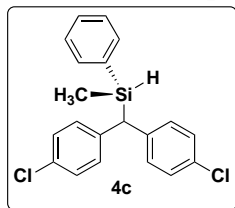

Synthesized using method F with diazo compound **2c** (0.2 mmol, 52.6 mg) to give a white solid in 91% yield (0.158 mmol, 65.7 mg). Enantiomeric ratio was determined by HPLC after hydrolysis with a Daicel CHIRALPAK® OD-H column (2% IPA/ hexanes), 1.0 mL/min.  $t_R$  (**4ca**) = 16.4 min,  $t_R$  (**4cb**) = 18.0 min, 74:26 er (Si-OH product). Absolute configuration was assigned to be (*S*, *S*) based on analogy to **5a**.

$^1\text{H}$  NMR (600 MHz,  $\text{CDCl}_3$ )  $\delta$  7.40 – 7.33 (m, 1H), 7.30 – 7.25 (m, 4H), 7.24 (d,  $J = 7.3$  Hz, 2H), 7.18 (d,  $J = 7.3$  Hz, 2H), 7.12 (d,  $J = 7.5$  Hz, 2H), 7.05 (d,  $J = 7.5$  Hz, 2H), 4.67 (p,  $J = 4.5, 4.1$  Hz, 1H), 3.75 (d,  $J = 3.7$  Hz, 1H), 0.30 (d,  $J = 2.8$  Hz, 3H).  $^{13}\text{C}$  NMR (101 MHz,  $\text{CDCl}_3$ )  $\delta$  140.3, 140.0, 134.8, 133.7, 131.5, 131.4, 130.1, 130.0, 129.9, 128.7, 128.6, 127.9, 41.9, -6.2.  $^{29}\text{Si}$  NMR (79 MHz,  $\text{CDCl}_3$ )  $\delta$  -10.8. MALDI  $m/z$  calc for  $\text{C}_{20}\text{H}_{18}\text{Cl}_2\text{Si}$  [ $\text{M} + \text{Na}$ ] $^+$  379.045. Found 379.220.

### Racemic Standard for **4c**:

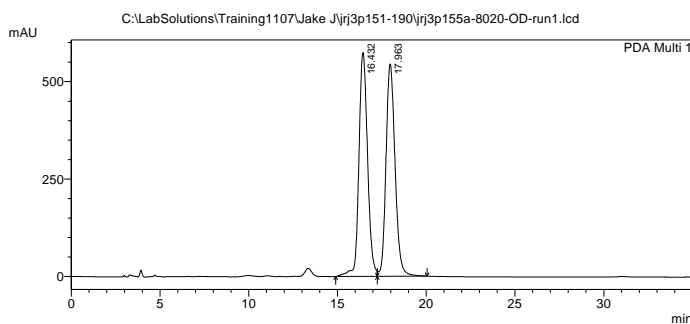

1 PDA Multi 1/232nm 4nm

< Peak Table >

PeakTable C:\LabSolutions\Training1107\Jake J\jrj3p151-190\jrj3p155a-8020-OD-run1.lcd

| Peak# | Ret. Time | Area     | Height  | Area %  | Height % |
|-------|-----------|----------|---------|---------|----------|
| 1     | 16.432    | 19469494 | 574519  | 50.125  | 51.331   |
| 2     | 17.963    | 19372708 | 544721  | 49.875  | 48.669   |
| Total |           | 38842201 | 1119240 | 100.000 | 100.000  |

### Enantiomerically enriched (*S*) **4c** using *S*-TCPTTL:

<Chromatogram>

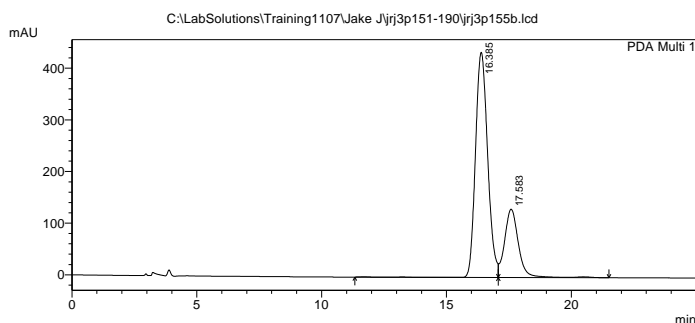

1 PDA Multi 1/232nm 4nm

< Peak Table >

PeakTable C:\LabSolutions\Training1107\Jake J\jrj3p151-190\jrj3p155b.lcd

| Peak# | Ret. Time | Area     | Height | Area %  | Height % |
|-------|-----------|----------|--------|---------|----------|
| 1     | 16.385    | 14732848 | 435744 | 74.301  | 76.728   |
| 2     | 17.583    | 5095809  | 132161 | 25.699  | 23.272   |
| Total |           | 19828657 | 567905 | 100.000 | 100.000  |

### (S)-benzhydryl(4-fluorophenyl)(methyl)silane (**4d**)

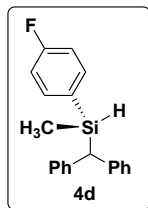

Synthesized using method F with diazo compound **2a** (0.2 mmol, 38.8 mg) to give a white solid in 66% yield (0.132 mmol, 40.4 mg). Enantiomeric ratio was determined by HPLC after hydrolysis with a Daicel CHIRALPAK® AD-H column (2% IPA/ hexanes), 1.0 mL/min.  $t_R$  (**4da**) = 10.2 min,  $t_R$  (**4db**) = 12.9 min 80:20 er (Si-OH product). Absolute configuration was assigned to be (*S*) based on analogy to **5a**.

$^1\text{H}$  NMR (400 MHz,  $\text{CDCl}_3$ )  $\delta$  7.31 (dd,  $J = 9.4, 5.8$  Hz, 3H), 7.28 – 7.23 (m, 5H), 7.23 – 7.13 (m, 4H), 6.99 (t,  $J = 8.7$  Hz, 2H), 4.76 (p,  $J = 3.9$  Hz, 1H), 3.82 (d,  $J = 3.9$  Hz, 1H), 0.35 (d,  $J = 3.6$  Hz, 3H).  $^{13}\text{C}$  NMR (101 MHz,  $\text{CDCl}_3$ )  $\delta$  164.0 (d,  $J_{\text{CF}} = 249.0$  Hz), 141.9, 141.75, 136.8 (d,  $J_{\text{CCCF}} = 7.4$  Hz), 130.1 (d,  $J_{\text{CCCCF}} = 3.9$  Hz), 128.9, 128.8, 128.6, 128.4, 125.6, 125.6, 115.0 (d,  $J_{\text{CCF}} = 19.8$  Hz), 43.2, -5.9.  $^{19}\text{F}$  NMR (376 MHz,  $\text{CDCl}_3$ )  $\delta$  -110.96.  $^{29}\text{Si}$  NMR (79 MHz,  $\text{CDCl}_3$ )  $\delta$  -11.1. MALDI  $m/z$  calc for  $\text{C}_{20}\text{H}_{19}\text{FSi}$  [ $\text{M} + \text{Na}$ ] $^+$  329.113. Found 329.158.

### Racemic Standard for **4d**:

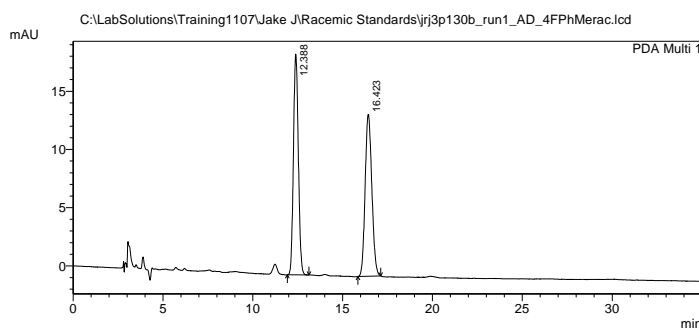

1 PDA Multi 1/265nm 4nm

< Peak Table >

| Peak# | Ret. Time | Area   | Height | Area %  | Height % |
|-------|-----------|--------|--------|---------|----------|
| 1     | 12.388    | 358819 | 18961  | 49.906  | 57.700   |
| 2     | 16.423    | 360171 | 13901  | 50.094  | 42.300   |
| Total |           | 718991 | 32862  | 100.000 | 100.000  |

### Spectrum index for racemic standard of **4d**:

Peak# : 1  
Retention Time : 12.388

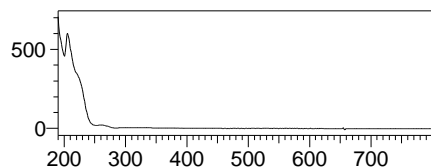

Peak# : 2  
Retention Time : 16.423

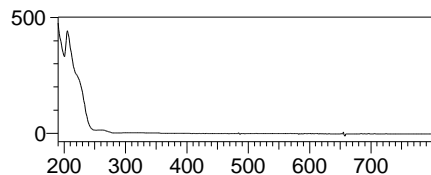

Enantiomerically enriched (S) **4d** using S-TCPTTL:

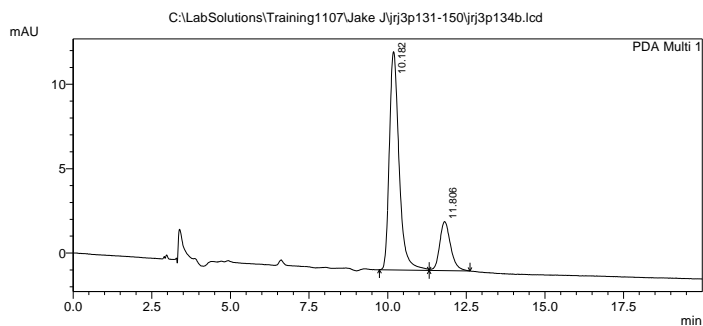

1 PDA Multi 1/254nm 4nm

< Peak Table >

PeakTable C:\LabSolutions\Training1107\Jake J\jrj3p131-150\jrj3p134b.lcd

| Peak# | Ret. Time | Area   | Height | Area %  | Height % |
|-------|-----------|--------|--------|---------|----------|
| 1     | 10.182    | 278783 | 12928  | 79.816  | 81.628   |
| 2     | 11.806    | 70500  | 2910   | 20.184  | 18.372   |
| Total |           | 349283 | 15838  | 100.000 | 100.000  |

Spectrum index for enantioenriched sample of **4d**:

Peak# : 1  
Retention Time : 10.182

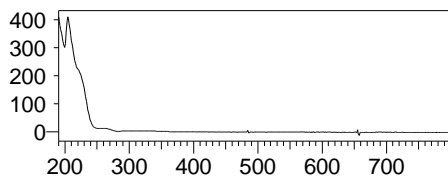

Peak# : 2  
Retention Time : 11.806

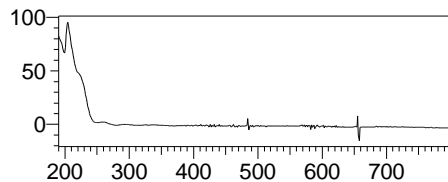

Spectrum indices between racemic standard and enantioenriched are identical, indicating the peaks are identical despite slightly different retention times.

### (S)-benzhydryl(4-methoxyphenyl)(methyl)silane (**4e**)

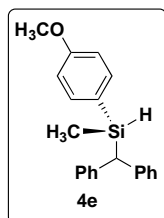

Synthesized using method F with diazo compound **2a** (0.2 mmol, 42.0 mg) to give a white solid in 72% yield (0.144 mmol, 45.9 mg). Enantiomeric ratio was determined by HPLC after hydrolysis with a Daicel CHIRALPAK® OD-H column (1% IPA/ hexanes), 1.0 mL/min.  $t_R$  (**4ea**) = 17.2,  $t_R$  (**4eb**) = 18.7, 50:50 er (Si-OH product). Absolute configuration was assigned to be (*S*, *S*) based on analogy to **5a**.

$^1H$  NMR (600 MHz,  $CDCl_3$ )  $\delta$  7.31 – 7.08 (m, 13H), 6.81 (d,  $J$  = 8.5 Hz, 2H), 4.70 (p,  $J$  = 3.7 Hz, 1H), 3.79 (d,  $J$  = 1.6 Hz, 4H), 0.28 (d,  $J$  = 3.6 Hz, 3H).  $^{13}C$  NMR (151 MHz,  $CDCl_3$ )  $\delta$  160.7, 142.3, 142.0, 141.4, 136.8, 136.3, 129.0, 128.8, 125.4, 125.3, 113.5, 113.1, 55.7, 43.4, -7.3.  $^{29}Si$  NMR (79 MHz,  $CDCl_3$ )  $\delta$  -11.6. MALDI  $m/z$  calc for  $C_{21}H_{22}OSi$  [ $M + H$ ] $^+$  319.151. Found 319.245.

### Racemic Standard for **4e**:

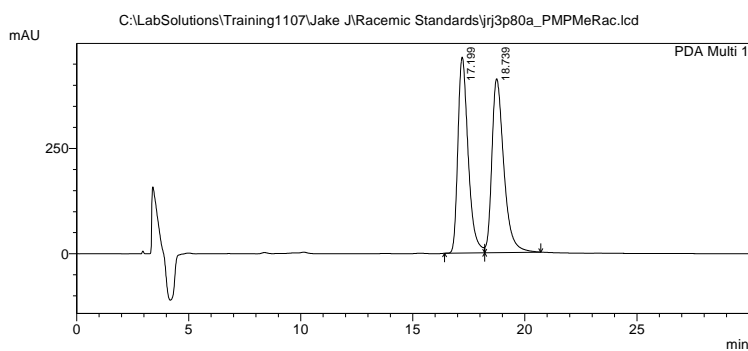

#### < Peak Table >

PeakTable C:\LabSolutions\Training1107\Jake J\Racemic Standards\jrj3p80a\_PMPMeRac.lcd

| Peak# | Ret. Time | Area     | Height | Area %  | Height % |
|-------|-----------|----------|--------|---------|----------|
| 1     | 17.199    | 14775321 | 465125 | 49.202  | 52.976   |
| 2     | 18.739    | 15254421 | 412863 | 50.798  | 47.024   |
| Total |           | 30029742 | 877988 | 100.000 | 100.000  |

### HPLC trace of **4e** using *S*-TCPTTL:

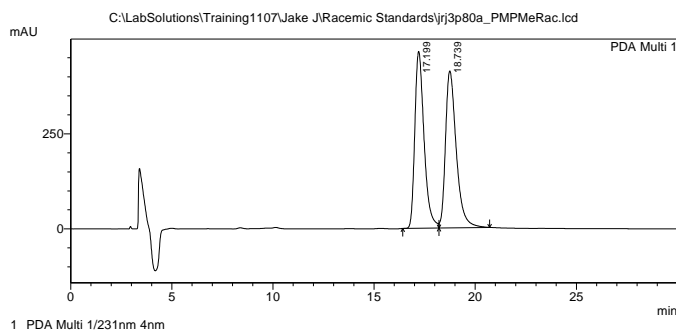

#### < Peak Table >

PeakTable C:\LabSolutions\Training1107\Jake J\Racemic Standards\jrj3p80a\_PMPMeRac.lcd

| Peak# | Ret. Time | Area     | Height | Area %  | Height % |
|-------|-----------|----------|--------|---------|----------|
| 1     | 17.199    | 14775321 | 465125 | 49.202  | 52.976   |
| 2     | 18.739    | 15254421 | 412863 | 50.798  | 47.024   |
| Total |           | 30029742 | 877988 | 100.000 | 100.000  |

### (S)-benzhydryl(4-methylphenyl)(methyl)silane (**4f**)

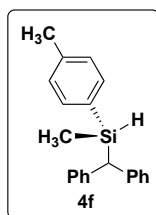

Synthesized using method F with diazo compound **2a** (0.2 mmol, 38.8 mg) to give a white solid in 76% yield (0.152 mmol, 46.0 mg). Enantiomeric ratio was determined by HPLC after hydrolysis with a Daicel CHIRALPAK® AD-H column (2% IPA/ hexanes), 1.0 mL/min.  $t_R$  (**4fa**) = 9.9 min,  $t_R$  (**4fb**) = 10.7 min, 74:26 er (Si-OH product). Absolute configuration was assigned to be (*S*) based on analogy to **5a**.

$^1\text{H NMR}$  (600 MHz,  $\text{CDCl}_3$ )  $\delta$  7.31 – 7.24 (m, 5H), 7.22 (dd,  $J = 8.8, 2.4$  Hz, 5H), 7.20 – 7.12 (m, 2H), 7.11 (d,  $J = 7.5$  Hz, 2H), 4.73 (p,  $J = 3.8$  Hz, 1H), 3.83 (d,  $J = 3.9$  Hz, 1H), 2.34 (s, 3H), 0.31 (d,  $J = 3.7$  Hz, 3H).  $^{13}\text{C NMR}$  (151 MHz,  $\text{CDCl}_3$ )  $\delta$  142.4, 142.2, 139.5, 135.1, 131.0, 129.1, 129.0, 128.7, 128.6, 128.5, 125.5, 44.2, 22.1, -5.8.  $^{29}\text{Si NMR}$  (79 MHz,  $\text{CDCl}_3$ )  $\delta$  -11.3. MALDI  $m/z$  calc for  $\text{C}_{21}\text{H}_{22}\text{Si}$   $[\text{M} + \text{H}]^+$  328.138. Found 325.207.

#### Racemic Standard for **4f**:

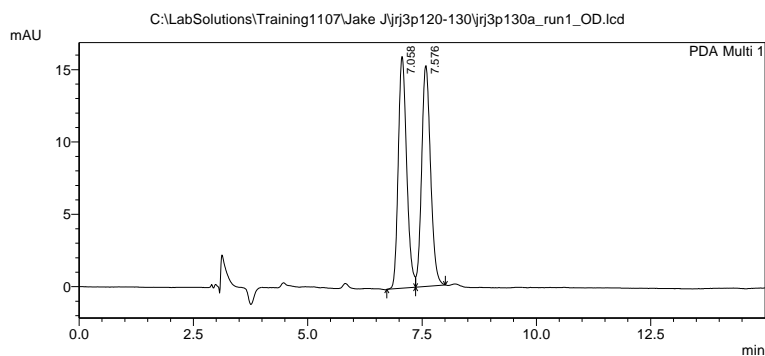

1 PDA Multi 1/254nm 4nm

#### < Peak Table >

PeakTable C:\LabSolutions\Training1107\Jake J\jrj3p120-130\jrj3p130a\_run1\_OD.lcd

| Peak# | Ret. Time | Area   | Height | Area %  | Height % |
|-------|-----------|--------|--------|---------|----------|
| 1     | 7.058     | 205950 | 16014  | 49.944  | 51.207   |
| 2     | 7.576     | 206416 | 15259  | 50.056  | 48.793   |
| Total |           | 412367 | 31273  | 100.000 | 100.000  |

#### Enantiomerically enriched (*S*) **4f** using *S*-TCPTTL:

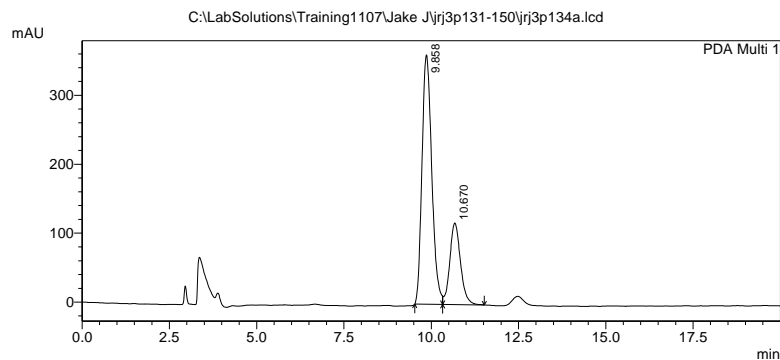

1 PDA Multi 1/205nm 4nm

#### < Peak Table >

PeakTable C:\LabSolutions\Training1107\Jake J\jrj3p131-150\jrj3p134a.lcd

| Peak# | Ret. Time | Area    | Height | Area %  | Height % |
|-------|-----------|---------|--------|---------|----------|
| 1     | 9.858     | 7044481 | 361590 | 73.577  | 75.312   |
| 2     | 10.670    | 2529844 | 118530 | 26.423  | 24.688   |
| Total |           | 9574324 | 480120 | 100.000 | 100.000  |

### (S)-benzhydryl(methyl)(naphthalen-2-yl)silane (**4g**)

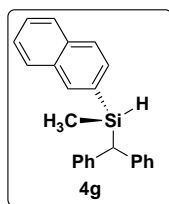

Synthesized according to the general procedure for enantioselective donor/donor insertion using **2a** (0.2 mmol, 38.8 mg) to give a white solid in 69% yield (0.158 mmol, 46.7 mg). Enantiomeric ratio was determined by HPLC after hydrolysis with a Daicel CHIRALPAK® AD-H column (1% IPA/ hexanes), 1.0 mL/min.  $t_R$  (**4ga**) = 19.5 min,  $t_R$  (**4gb**) = 24.2 min, 82:18 er (Si-OH product). Absolute configuration was assigned to be (*S*) based on analogy to **5a**.

$^1H$  NMR (600 MHz,  $C_6D_6$ )  $\delta$  7.86 (s, 1H), 7.61 – 7.49 (m, 3H), 7.33 (d,  $J$  = 8.1 Hz, 1H), 7.28 – 7.18 (m, 6H), 7.13 (t,  $J$  = 7.6 Hz, 2H), 7.04 (dt,  $J$  = 13.7, 7.4 Hz, 3H), 6.97 (t,  $J$  = 7.3 Hz, 1H), 5.04 (p,  $J$  = 3.6 Hz, 1H), 3.83 (d,  $J$  = 3.8 Hz, 1H), 0.32 (d,  $J$  = 3.6 Hz, 3H).  $^{13}C$  NMR (151 MHz,  $CDCl_3$ )  $\delta$  142.2, 142.0, 136.1, 134.0, 132.9, 132.3, 130.9, 129.1, 129.0, 128.66, 128.5, 128.2, 127.8, 127.0, 126.7, 126.0, 125.7, 125.6, 43.3, -5.7.  $^{29}Si$  NMR (119 MHz,  $C_6D_6$ )  $\delta$  -10.9 MALDI  $m/z$  calc for  $C_{24}H_{22}Si$  [ $M + Na$ ] $^+$  361.1383. Found 363.1318.

### Racemic Standard for **4g**:

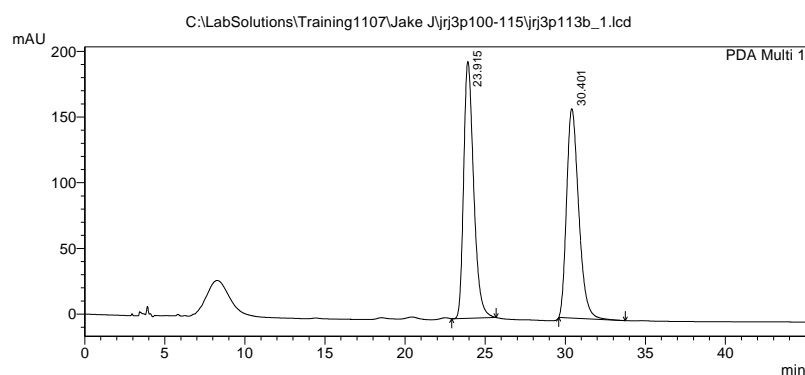

### Enantiomerically enriched (*S*) **4g** using *S*-TCPTTL:

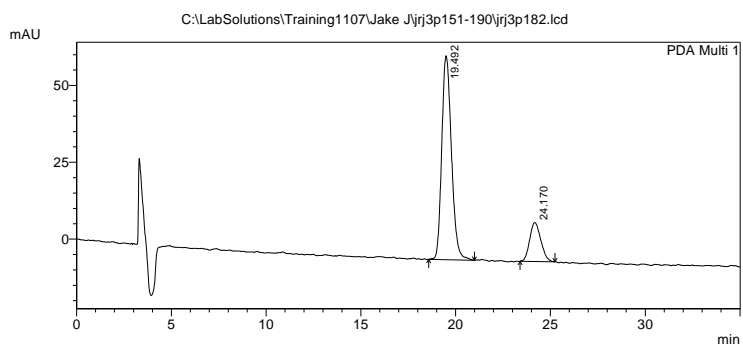

1 PDA Multi 1/268nm 4nm

#### < Peak Table >

PeakTable C:\LabSolutions\Training1107\Jake J\jrj3p151-190\jrj3p182.lcd

| Peak# | Ret. Time | Area    | Height | Area %  | Height % |
|-------|-----------|---------|--------|---------|----------|
| 1     | 19.492    | 2360689 | 66341  | 82.092  | 83.988   |
| 2     | 24.170    | 514989  | 12648  | 17.908  | 16.012   |
| Total |           | 2875678 | 78989  | 100.000 | 100.000  |

### (S)-benzhydryl(methyl)(naphthalen-1-yl)silane (**4h**)

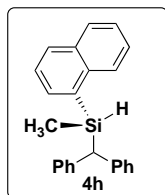

Synthesized using method F with diazo compound **2a** (0.2 mmol, 38.8 mg) to give a white solid in 60% yield (0.12 mmol, 40.6 mg). Enantiomeric ratio was determined by HPLC after hydrolysis with a Daicel CHIRALPAK® AD-H column (1% IPA/ hexanes), 1.0 mL/min.  $t_R$  (**4ha**) = 10.1 min,  $t_R$  (**4hb**) = 11.2 min, 77:23 er (Si-OH product). Absolute configuration was assigned to be (*S*, *S*) based on analogy to **5a**.

<sup>1</sup>H NMR (600 MHz, C<sub>6</sub>D<sub>6</sub>)  $\delta$  8.08 – 8.01 (m, 1H), 7.63 – 7.58 (m, 2H), 7.54 – 7.49 (m, 1H), 7.25 (m, 2H), 7.19 (d,  $J$  = 7.5 Hz, 4H), 7.14 (s, 1H), 7.09 (t,  $J$  = 7.6 Hz, 2H), 7.03 – 6.96 (m, 3H), 6.91 (t,  $J$  = 7.3 Hz, 1H), 5.33 (p,  $J$  = 3.6 Hz, 1H), 4.05 (d,  $J$  = 4.0 Hz, 1H), 0.36 (d,  $J$  = 3.7 Hz, 3H). <sup>13</sup>C NMR (151 MHz, CDCl<sub>3</sub>)  $\delta$  142.3, 142.2, 137.1, 135.2, 133.3, 133.3, 130.4, 129.0, 129.0, 128.6, 128.4, 127.8, 126.0, 125.6, 125.5, 125.1, 43.1, -5.0. <sup>29</sup>Si NMR (79 MHz, CDCl<sub>3</sub>)  $\delta$  -15.6. MALDI  $m/z$  calc for C<sub>24</sub>H<sub>22</sub>Si [M + Na]<sup>+</sup> 361.1383. Found 361.1446.

### Racemic Standard for **4h**:

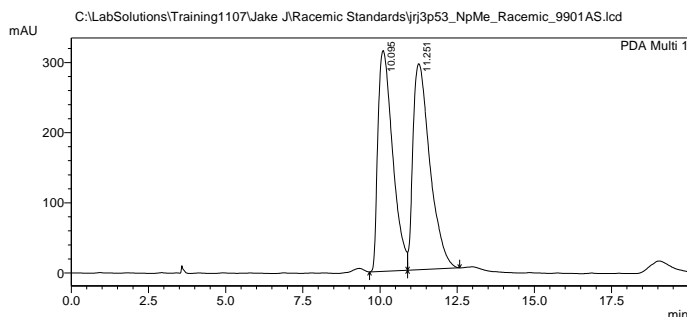

1 PDA Multi 1/284nm 4nm

< Peak Table >

Peak Table C:\LabSolutions\Training1107\Jake J\Racemic Standards\jrj3p53\_NpMe\_Racemic\_9901AS.lcd

| Peak# | Ret. Time | Area     | Height | Area %  | Height % |
|-------|-----------|----------|--------|---------|----------|
| 1     | 10.095    | 10468276 | 314759 | 48.236  | 51.733   |
| 2     | 11.251    | 11233883 | 293668 | 51.764  | 48.267   |
| Total |           | 21702159 | 608427 | 100.000 | 100.000  |

### Spectrum index for racemic standard of **4h**:

Peak# : 1  
Retention Time : 10.095

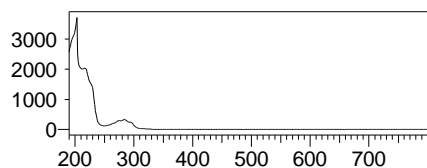

Peak# : 2  
Retention Time : 11.251

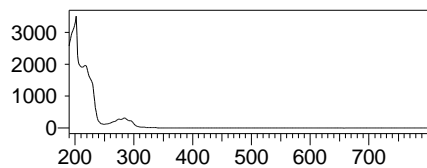

Enantiomerically enriched (*S*) **4h** using *S*-TCPTTL:

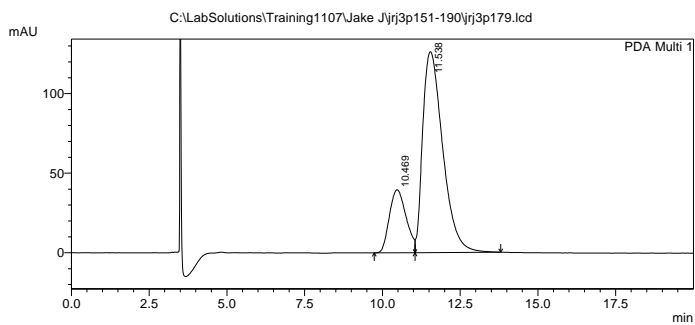

1 PDA Multi 1/254nm 4nm

< Peak Table >

PeakTable C:\LabSolutions\Training1107\Jake J\jrj3p151-190\jrj3p179.lcd

| Peak# | Ret. Time | Area    | Height | Area %  | Height % |
|-------|-----------|---------|--------|---------|----------|
| 1     | 10.469    | 1482658 | 39621  | 20.760  | 23.884   |
| 2     | 11.538    | 5659377 | 126271 | 79.240  | 76.116   |
| Total |           | 7142035 | 165892 | 100.000 | 100.000  |

PDA Ch1 254nm 4nm

Spectrum index for enantioenriched sample of **4h**:

Peak# : 1  
Retention Time : 10.469

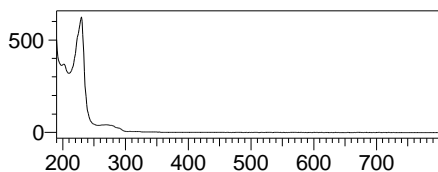

Peak# : 2  
Retention Time : 11.538

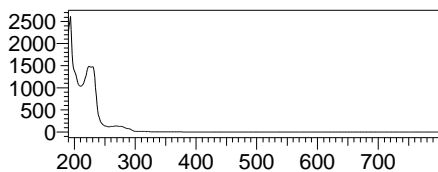

Spectrum indices between racemic standard and enantioenriched are identical, indicating the peaks are identical despite slightly different retention times.



### (*S*)-benzhydryl(2-methylphenyl)(methyl)silane (**4i**)

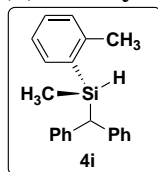

Synthesized using method F with diazo compound **2a** (0.2 mmol, 38.8 mg) to give a white solid in 55% yield (0.110 mmol, 33.2 mg). Enantiomeric ratio was determined by HPLC after hydrolysis with a Daicel CHIRALPAK® OD-H column (1% IPA/ hexanes), 1.0 mL/min.  $t_r$  (**4ia**) = 10.9 min,  $t_r$  (**4ib**) = 12.6 min, 69:31 er (Si-OH product). Absolute configuration was assigned to be (*S*, *S*) based on analogy to **5a**.

$^1\text{H}$  NMR (600 MHz,  $\text{CDCl}_3$ )  $\delta$  7.34 (m, 1H), 7.27 (m, 1H), 7.25 – 7.21 (m, 4H), 7.15 (m, 5H), 7.11 – 7.04 (m, 3H), 4.82 (p,  $J = 3.7$  Hz, 1H), 3.86 (d,  $J = 4.3$  Hz, 1H), 2.17 (s, 3H), 0.28 (d,  $J = 3.7$  Hz, 3H).  $^{13}\text{C}$  NMR (151 MHz,  $\text{CDCl}_3$ )  $\delta$  144.3, 142.4, 142.3, 135.6, 133.8, 129.8, 129.7, 129.1, 128.8, 128.6, 128.4, 125.6, 125.5, 125.0, 43.2, 22.6, -5.4.  $^{29}\text{Si}$  NMR (119 MHz,  $\text{CDCl}_3$ )  $\delta$  -13.7 MALDI  $m/z$  calc for  $\text{C}_{21}\text{H}_{22}\text{Si}$  [ $\text{M} + \text{H}$ ] $^+$  328.138. Found 325.227.

### Racemic Standard for **4i**:

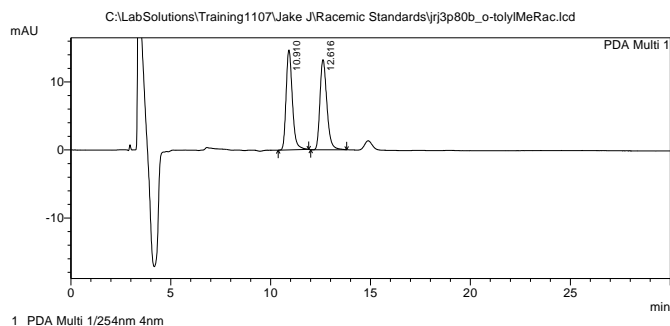

1 PDA Multi 1/254nm 4nm

< Peak Table >

PeakTable C:\LabSolutions\Training1107\Jake J\Racemic Standards\jrj3p80b\_o-tolylMeRac.lcd

PDA Ch1 254nm 4nm

| Peak# | Ret. Time | Area   | Height | Area %  | Height % |
|-------|-----------|--------|--------|---------|----------|
| 1     | 10.910    | 318494 | 14704  | 50.034  | 52.599   |
| 2     | 12.616    | 318058 | 13251  | 49.966  | 47.401   |
| Total |           | 636552 | 27956  | 100.000 | 100.000  |

### Enantiomerically enriched (*S,S*) **4i** using *S*-TCPTTL:

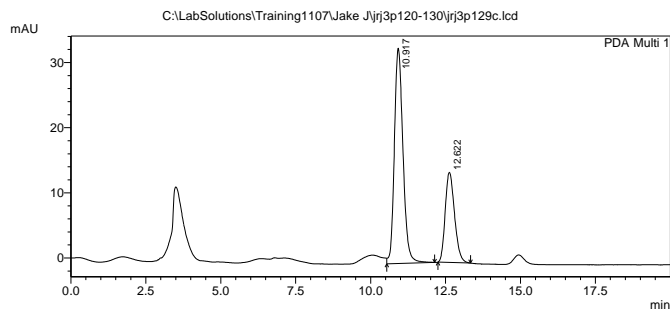

1 PDA Multi 1/254nm 4nm

< Peak Table >

PeakTable C:\LabSolutions\Training1107\Jake J\jrj3p120-130\jrj3p129c.lcd

PDA Ch1 254nm 4nm

| Peak# | Ret. Time | Area   | Height | Area %  | Height % |
|-------|-----------|--------|--------|---------|----------|
| 1     | 10.917    | 660519 | 33039  | 68.790  | 70.490   |
| 2     | 12.622    | 299672 | 13831  | 31.210  | 29.510   |
| Total |           | 960191 | 46870  | 100.000 | 100.000  |

## (*S*)-benzhydryl(mesityl)(methyl)silane (**4j**)

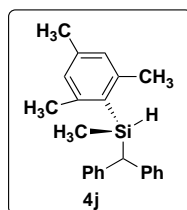

Synthesized using method F with diazo compound **2a** (0.2 mmol, 38.8 mg) to give a white solid in 64% yield (0.128 mmol, 42.3 mg). Enantiomeric ratio was determined by HPLC after hydrolysis with a Daicel CHIRALPAK® OD-H column (2% IPA/hexaness), 1.0 mL/min.  $t_R$  (**4ja**) = 6.8 min,  $t_R$  (**4jb**) = 8.6 min, 60:40 er (Si-OH product). Absolute configuration was assigned to be (*S*) based on analogy to **5a**.

$^1\text{H}$  NMR (400 MHz,  $\text{CDCl}_3$ )  $\delta$  7.31 (m, 3H), 7.28 – 7.13 (m, 2H), 7.10 (d,  $J$  = 4.7 Hz, 4H), 7.04 (m, 1H), 6.75 (s, 2H), 4.94 (p,  $J$  = 4.3 Hz, 1H), 3.92 (d,  $J$  = 5.4 Hz, 1H), 2.24 (s, 9H), 0.29 (d,  $J$  = 4.0 Hz, 3H).  $^{13}\text{C}$  NMR (101 MHz,  $\text{CDCl}_3$ )  $\delta$  144.7, 142.7, 142.4, 139.4, 129.3, 129.1, 128.7, 128.6, 128.4, 128.3, 125.7, 125.3, 43.4, 24.1, 21.2, -3.7.  $^{29}\text{Si}$  NMR (79 MHz,  $\text{CDCl}_3$ )  $\delta$  -18.0. MALDI  $m/z$  calc for  $\text{C}_{23}\text{H}_{26}\text{Si}$  [ $\text{M} + \text{Na}$ ] $^+$  353.170. Found 353.248.

### Racemic Standard for **4j**:

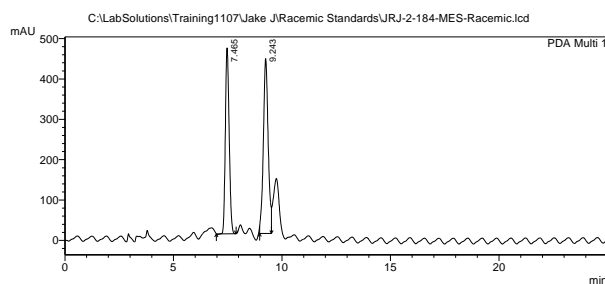

1 PDA Multi 1/207nm 4nm

< Peak Table >

PeakTable C:\LabSolutions\Training1107\Jake J\Racemic Standards\URJ-2-184-MES-Racemic.lcd

| Peak# | Ret. Time | Area     | Height | Area %  | Height % |
|-------|-----------|----------|--------|---------|----------|
| 1     | 7.465     | 5633456  | 460567 | 45.645  | 51.548   |
| 2     | 9.243     | 6708400  | 432898 | 54.355  | 48.452   |
| Total |           | 12341856 | 893465 | 100.000 | 100.000  |

### Enantiomerically enriched (*S,S*) **4j** using *S*-TCPTTL:

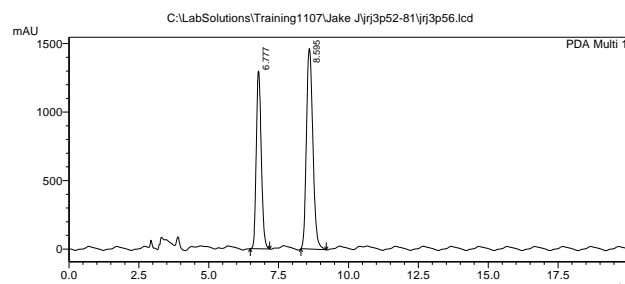

1 PDA Multi 1/207nm 4nm

< Peak Table >

PeakTable C:\LabSolutions\Training1107\Jake J\jrj3p52-81\jrj3p56.lcd

| Peak# | Ret. Time | Area     | Height  | Area %  | Height % |
|-------|-----------|----------|---------|---------|----------|
| 1     | 6.777     | 16197961 | 1298528 | 40.801  | 47.019   |
| 2     | 8.595     | 23302137 | 1463158 | 59.199  | 52.981   |
| Total |           | 39700098 | 2761686 | 100.000 | 100.000  |

### (*S*)-benzhydryl(isobutyl)(naphthalen-1-yl)silane (**4k**)

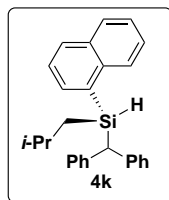

Synthesized using method F with diazo compound **2a** (0.2 mmol, 38.8 mg) to give a white solid in 60% yield (0.120 mmol, 41.3 mg). Enantiomeric ratio was determined by HPLC after hydrolysis with a Daicel CHIRALPAK® AD-H column (1% IPA/ hexanes), 1.0 mL/min.  $t_r$  (**4ka**) = 10.9 min,  $t_r$  (**4kb**) = 12.6 min, 82:18 er (Si-OH product). Absolute configuration was assigned to be (*S*) based on analogy to **5a**.

$^1\text{H}$  NMR (600 MHz,  $\text{CDCl}_3$ )  $\delta$  7.92 (d,  $J$  = 8.3 Hz, 1H), 7.83 (dd,  $J$  = 8.1, 6.4 Hz, 2H), 7.59 (dd,  $J$  = 6.7, 1.2 Hz, 1H), 7.48 – 7.43 (m, 1H), 7.40 (ddd,  $J$  = 8.1, 6.8, 1.4 Hz, 1H), 7.36 (td,  $J$  = 7.3, 6.7, 1.2 Hz, 1H), 7.30 – 7.26 (m, 5H), 7.26 – 7.23 (m, 1H), 7.17 (ddd,  $J$  = 8.5, 5.1, 1.8 Hz, 1H), 7.09 (d,  $J$  = 6.8 Hz, 2H), 7.07-7.03 (m 2H), 7.00 (td,  $J$  = 6.9, 1.4 Hz, 1H), 5.11 (td,  $J$  = 5.0, 2.2 Hz, 1H), 4.04 (d,  $J$  = 4.5 Hz, 1H), 1.59 (ddt,  $J$  = 12.9, 7.7, 6.5 Hz, 1H), 1.03 (dt,  $J$  = 14.8, 5.8 Hz, 1H), 0.89 (dtd,  $J$  = 14.3, 7.1, 6.4, 2.3 Hz, 1H), 0.82 (t,  $J$  = 6.3 Hz, 7H).  $^{13}\text{C}$  NMR (151 MHz,  $\text{CDCl}_3$ )  $\delta$  142.4, 142.4, 137.3, 135.9, 133.3, 132.8, 130.3, 129.2, 129.0, 128.8, 128.6, 128.3, 127.9, 125.9, 125.7, 125.5, 125.3, 125.1, 41.4, 26.2, 25.5, 25.4, 22.5.  $^{29}\text{Si}$  NMR (79 MHz,  $\text{CDCl}_3$ )  $\delta$  -9.5. MALDI  $m/z$  calc for  $\text{C}_{27}\text{H}_{28}\text{Si}$  [ $\text{M} - \text{H}$ ] $^+$  379.1877. Found 379.220.

### Racemic Standard for **4k**:

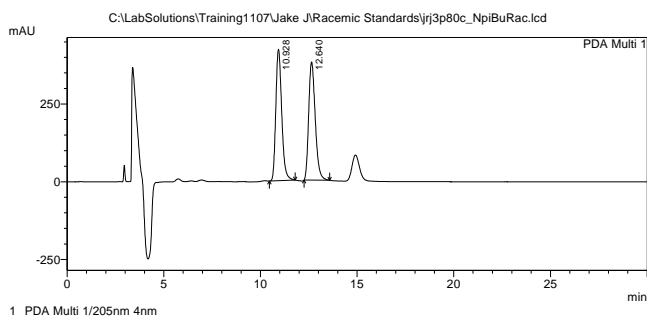

1 PDA Multi 1/205nm 4nm

< Peak Table >

PeakTable C:\LabSolutions\Training\1107\Jake J\Racemic Standards\jrj3p80c\_NpiBuRac.lcd

| Peak# | Ret. Time | Area     | Height | Area %  | Height % |
|-------|-----------|----------|--------|---------|----------|
| 1     | 10.928    | 8992685  | 422849 | 50.155  | 52.701   |
| 2     | 12.640    | 8937207  | 379512 | 49.845  | 47.299   |
| Total |           | 17929892 | 802361 | 100.000 | 100.000  |

### Enantiomerically enriched (*S,S*) **4k** using *S*-TCPTTL:

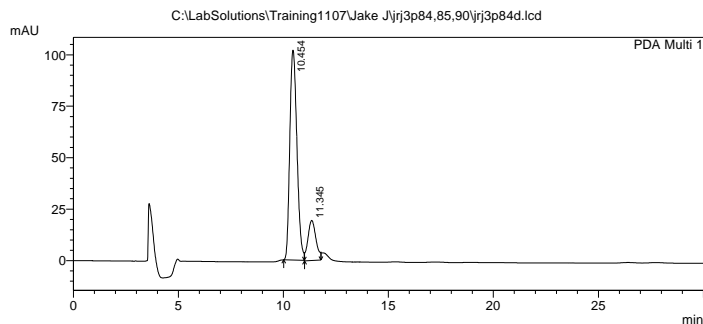

1 PDA Multi 1/285nm 4nm

< Peak Table >

PeakTable C:\LabSolutions\Training\1107\Jake J\jrj3p84,85,90\jrj3p84d.lcd

| Peak# | Ret. Time | Area    | Height | Area %  | Height % |
|-------|-----------|---------|--------|---------|----------|
| 1     | 10.454    | 2402971 | 101957 | 82.469  | 83.984   |
| 2     | 11.345    | 510822  | 19444  | 17.531  | 16.016   |
| Total |           | 2913793 | 121400 | 100.000 | 100.000  |

### (S)-benzhydryl(isobutyl)(phenyl)silane (**4l**)

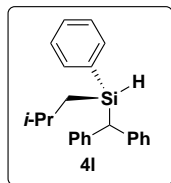

Synthesized using method F with diazo compound **2a** (0.2 mmol, 38.8 mg) and isobutylphenylsilane (164.3 mg) to give a white solid in 45% yield (0.090 mmol, 29.7 mg). Enantiomeric ratio was determined by HPLC after hydrolysis with a Daicel CHIRALPAK® OD-H column (1% IPA/ hexanes), 1.0 mL/min.  $t_R$  (**4la**) = 5.6 min,  $t_R$  (**4lb**) = 6.2 min, 86:14 er (Si-OH product). Absolute configuration was assigned to be (*S*, *S*) based on analogy to **5a**.

$^1\text{H}$  NMR (400 MHz,  $\text{CDCl}_3$ )  $\delta$  7.40 – 7.31 (m, 3H), 7.29 (d,  $J$  = 5.5 Hz, 6H), 7.25 – 7.15 (m, 5H), 7.12 (t,  $J$  = 6.8 Hz, 1H), 4.74 (h,  $J$  = 2.2 Hz, 1H), 3.86 (d,  $J$  = 3.9 Hz, 1H), 1.68 (dh,  $J$  = 12.5, 6.3 Hz, 1H), 0.93 (d,  $J$  = 5.9 Hz, 1H), 0.89 (d,  $J$  = 6.6 Hz, 6H), 0.80 (dd,  $J$  = 14.7, 7.7 Hz, 1H).  $^{13}\text{C}$  NMR (101 MHz,  $\text{CDCl}_3$ )  $\delta$  142.4, 142.2, 135.4, 134.3, 129.5, 129.1, 129.0, 128.6, 128.4, 127.8, 125.6, 125.4, 42.8, 26.1, 25.5, 25.2, 21.7.  $^{29}\text{Si}$  NMR (79 MHz,  $\text{CDCl}_3$ )  $\delta$  -8.7. Did not ionize using ESI-MS or MALDI-TOF.

### Racemic Standard for **4l**:

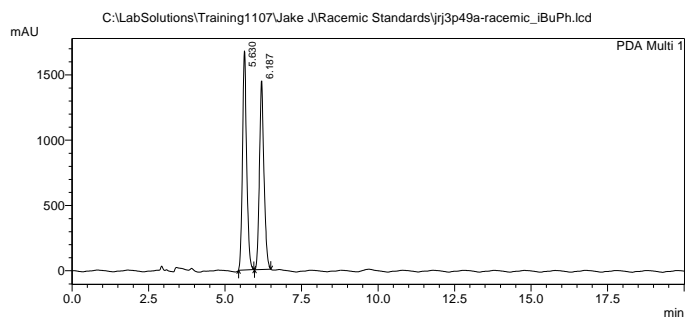

1 PDA Multi 1/195nm 4nm

< Peak Table >

PeakTable C:\LabSolutions\Training1107\Jake J\Racemic Standards\jrj3p49a-racemic\_iBuPh.lcd

| Peak# | Ret. Time | Area     | Height  | Area %  | Height % |
|-------|-----------|----------|---------|---------|----------|
| 1     | 5.630     | 13800629 | 1676986 | 51.577  | 53.732   |
| 2     | 6.187     | 14834414 | 1444032 | 48.423  | 46.268   |
| Total |           | 30635043 | 3121017 | 100.000 | 100.000  |

### Enantiomerically enriched (*S*) **4l** using *S*-TCPTTL:

<Chromatogram>

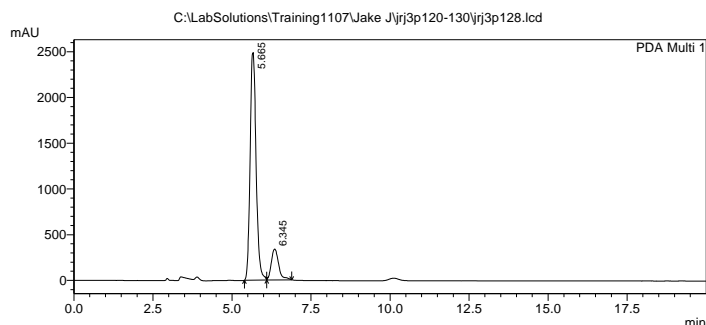

1 PDA Multi 1/194nm 4nm

< Peak Table >

PeakTable C:\LabSolutions\Training1107\Jake J\jrj3p120-130\jrj3p128.lcd

| Peak# | Ret. Time | Area     | Height  | Area %  | Height % |
|-------|-----------|----------|---------|---------|----------|
| 1     | 5.665     | 32779438 | 2487817 | 85.694  | 88.076   |
| 2     | 6.345     | 5472326  | 336794  | 14.306  | 11.924   |
| Total |           | 38251764 | 2824612 | 100.000 | 100.000  |

### (*S*)-benzhydryl(neopentyl)(phenyl)silane (**4m**)

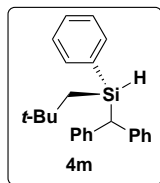

Synthesized using method F with diazo compound **2a** (0.2 mmol, 42.0 mg) to give a white solid in 60% yield (0.120 mmol, 41.3 mg). Enantiomeric ratio was determined by HPLC after hydrolysis with a Daicel CHIRALPAK® AD-H column (1% IPA/ heptane), 1.0 mL/min.  $t_r$  (**4ma**) = 10.6 min,  $t_r$  (**4mb**) = 13.1 min, 50:50 er (Si-OH product). Absolute configuration was assigned to be (*S*) based on analogy to **5a**.

$^1\text{H}$  NMR (400 MHz,  $\text{CDCl}_3$ )  $\delta$  7.37 – 7.30 (m, 3H), 7.30 – 7.21 (m, 6H), 7.18 (t,  $J = 6.8$  Hz, 3H), 7.15 – 7.04 (m, 3H), 4.81 (t,  $J = 4.7$  Hz, 1H), 3.80 (d,  $J = 4.0$  Hz, 1H), 1.08 (dd,  $J = 14.7, 5.4$  Hz, 1H), 0.93 (s, 1H), 0.89 (s, 9H).  $^{13}\text{C}$  NMR (101 MHz,  $\text{CDCl}_3$ )  $\delta$  142.4, 142.2, 135.4, 135.3, 129.4, 129.3, 128.9, 128.6, 128.3, 127.7, 125.6, 125.3, 43.3, 32.5, 30.6, 27.45.  $^{29}\text{Si}$  NMR (79 MHz,  $\text{CDCl}_3$ )  $\delta$  -11.1. Did not ionize using ESI, MALDI or APCI.

### Racemic Standard for **4m**:

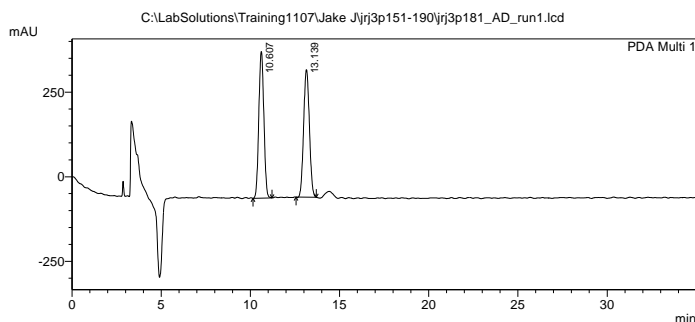

1 PDA Multi 1/205nm 4nm

< Peak Table >

PeakTable C:\LabSolutions\Training1107\Jake J\jrj3p151-190\jrj3p181\_AD\_run1.lcd

| Peak# | Ret. Time | Area     | Height | Area %  | Height % |
|-------|-----------|----------|--------|---------|----------|
| 1     | 10.607    | 8549235  | 433259 | 50.265  | 53.471   |
| 2     | 13.139    | 8459167  | 377007 | 49.735  | 46.529   |
| Total |           | 17008402 | 810266 | 100.000 | 100.000  |

### Enantiomerically enriched (*S*) **4m** using *S*-TCPTTL:

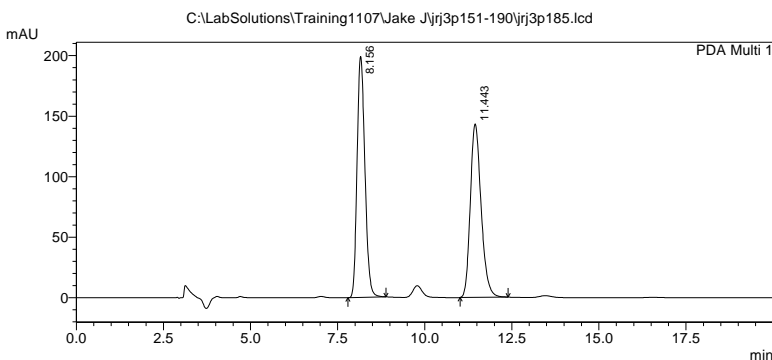

1 PDA Multi 1/285nm 4nm

< Peak Table >

PeakTable C:\LabSolutions\Training1107\Jake J\jrj3p151-190\jrj3p185.lcd

| Peak# | Ret. Time | Area    | Height | Area %  | Height % |
|-------|-----------|---------|--------|---------|----------|
| 1     | 8.156     | 3118650 | 199177 | 50.230  | 58.155   |
| 2     | 11.443    | 3090035 | 143318 | 49.770  | 41.845   |
| Total |           | 6208685 | 342495 | 100.000 | 100.000  |

### (*S*)-benzhydryl(cyclohexyl)(phenyl)silane (**4n**)

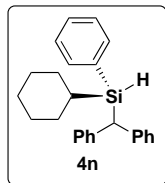

Synthesized using method F with diazo compound **2a** (0.2 mmol, 38.8 mg) to give a white solid in 77% yield (0.158 mmol, 54.9 mg). Enantiomeric ratio was determined by HPLC after hydrolysis with a Daicel CHIRALPAK® AD-H column (2% IPA/ hexanes), 1.0 mL/min.  $t_R$  (**4na**) = 37.7 min,  $t_R$  (**4nb**) = 42.6 min, 70:30 er (Si-OH product). Absolute configuration was assigned to be (*S*) based on analogy to **5a**.

$^1\text{H}$  NMR (600 MHz,  $\text{CDCl}_3$ )  $\delta$  7.34 – 7.27 (m, 6H), 7.27 – 7.20 (m, 4H), 7.19 – 7.10 (m, 5H), 7.07 – 7.01 (m, 1H), 4.48 (dd,  $J$  = 4.5, 2.9 Hz, 1H), 3.96 (d,  $J$  = 4.4 Hz, 1H), 1.72 – 1.62 (m, 1H), 1.65 – 1.55 (m, 4H), 1.17 – 1.01 (m, 5H), 1.00 – 0.90 (m, 1H). NMR (151 MHz,  $\text{CDCl}_3$ )  $\delta$  142.6, 142.3, 135.8, 133.2, 129.4, 129.2, 129.0, 128.6, 128.4, 127.7, 125.7, 125.4, 40.5, 28.5, 28.1, 27.8, 26.8, 22.9.  $^{29}\text{Si}$  NMR (79 MHz,  $\text{CDCl}_3$ )  $\delta$  -2.8. MALDI  $m/z$  calc for  $\text{C}_{25}\text{H}_{28}\text{Si}$  [ $\text{M} + \text{Na}$ ] $^+$  379.185. Found 379.140.

### Racemic Standard for **4n**:

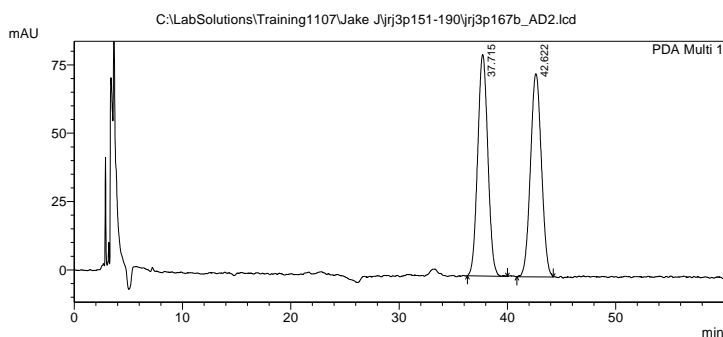

1 PDA Multi 1/204nm 4nm

< Peak Table >

| PeakTable C:\LabSolutions\Training1107\Jake J\jrj3p151-190\jrj3p167b_AD2.lcd |           |          |        |         |          |
|------------------------------------------------------------------------------|-----------|----------|--------|---------|----------|
| PDA Ch1 204nm 4nm                                                            |           |          |        |         |          |
| Peak#                                                                        | Ret. Time | Area     | Height | Area %  | Height % |
| 1                                                                            | 37.715    | 5281022  | 81077  | 50.124  | 52.165   |
| 2                                                                            | 42.622    | 5254858  | 74346  | 49.876  | 47.835   |
| Total                                                                        |           | 10535880 | 155423 | 100.000 | 100.000  |

### Enantiomerically enriched (*S,S*) **4n** using *S*-TCPTTL:

<Chromatogram>

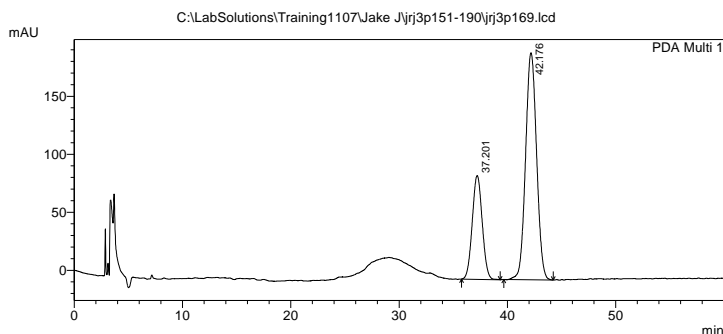

1 PDA Multi 1/204nm 4nm

< Peak Table >

| PeakTable C:\LabSolutions\Training1107\Jake J\jrj3p151-190\jrj3p169.lcd |           |          |        |         |          |
|-------------------------------------------------------------------------|-----------|----------|--------|---------|----------|
| PDA Ch1 204nm 4nm                                                       |           |          |        |         |          |
| Peak#                                                                   | Ret. Time | Area     | Height | Area %  | Height % |
| 1                                                                       | 37.201    | 5726477  | 89443  | 29.288  | 31.364   |
| 2                                                                       | 42.176    | 13826155 | 195731 | 70.712  | 68.636   |
| Total                                                                   |           | 19552632 | 285174 | 100.000 | 100.000  |

### (S)-3-benzhydryl-1,1,1-triethyl-3-phenyldisiloxane (**4o**)

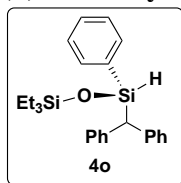

Synthesized using method F with diazo compound **2a** (0.2 mmol, 38.8 mg) to give a white solid in 60% yield (0.120 mmol, 41.3 mg). Enantiomeric ratio was determined by HPLC after hydrolysis with a Daicel CHIRALPAK® AD-H column (2% IPA/ hexanes), 1.0 mL/min.  $t_R$  (**4oa**) = 9.5 min,  $t_R$  (**4ob**) = 10.6 min, 61:39 er (Si-OH product). Absolute configuration was assigned to be (*S*) based on analogy to **5a**.

$^1\text{H}$  NMR (600 MHz,  $\text{CDCl}_3$ )  $\delta$  7.37 – 7.31 (m, 1H), 7.31 – 7.25 (m, 8H), 7.25 – 7.20 (m, 3H), 7.20 – 7.09 (m, 3H), 5.30 (d,  $J$  = 2.6 Hz, 1H), 3.80 (d,  $J$  = 2.6 Hz, 1H), 0.80 (t,  $J$  = 8.0 Hz, 6H), 0.41 (q,  $J$  = 7.7 Hz, 6H).  $^{13}\text{C}$  NMR (101 MHz,  $\text{CDCl}_3$ )  $\delta$  141.1, 141.0, 135.5, 134.1, 130.0, 129.5, 129.1, 128.5, 128.5, 127.7, 125.7, 125.6, 44.4, 6.7, 6.0.  $^{29}\text{Si}$  NMR (79 MHz,  $\text{CDCl}_3$ )  $\delta$  -14.5, -18.4/ Did not ionize using ESI, MALDI or APCI.

### Racemic Standard for **4o**:

<Chromatogram>

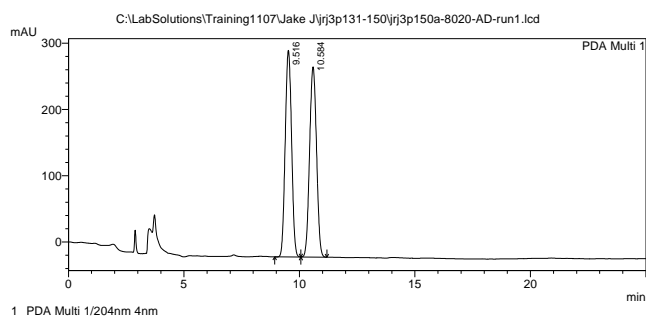

1 PDA Multi 1/204nm 4nm

< Peak Table >

PeakTable C:\LabSolutions\Training\1107\Jake J\jrj3p131-150\jrj3p150a-8020-AD-run1.lcd

| Peak# | Ret. Time | Area     | Height | Area %  | Height % |
|-------|-----------|----------|--------|---------|----------|
| 1     | 9.516     | 5973920  | 311973 | 49.931  | 32.058   |
| 2     | 10.584    | 5990388  | 287304 | 50.069  | 47.942   |
| Total |           | 11964308 | 599277 | 100.000 | 100.000  |

### Enantiomerically enriched (*S,S*) **4o** using *S*-TCPTTL:

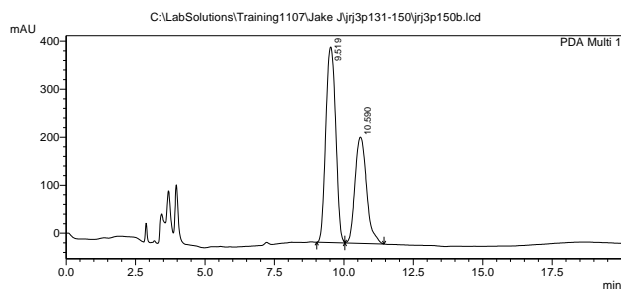

1 PDA Multi 1/204nm 4nm

< Peak Table >

PeakTable C:\LabSolutions\Training\1107\Jake J\jrj3p131-150\jrj3p150b.lcd

| Peak# | Ret. Time | Area     | Height | Area %  | Height % |
|-------|-----------|----------|--------|---------|----------|
| 1     | 9.519     | 10084552 | 407338 | 61.079  | 64.804   |
| 2     | 10.590    | 6426044  | 221227 | 38.921  | 35.196   |
| Total |           | 16510595 | 628565 | 100.000 | 100.000  |

### (*S*)-methyl(phenyl)((*S*)-phenyl(*o*-tolyl)methyl)silane (**5a**):

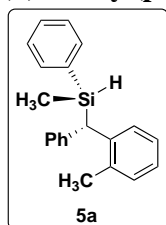

Synthesized using method G with Diazo compound **3a** (5.1 mmol, 1.00 g) to give a clear oil in 89% yield (93:7 dr, 1.34 g, 4.5 mmol). Enantiomeric ratio was determined by HPLC after hydrolysis with a Daicel CHIRALPAK® AD-H column (1% IPA/ heptane), 1.0 mL/min.  $t_R$  (**5aa**) = 29.9 min,  $t_R$  (**5ab**) = 32.1 min,  $t_R$  (**5aa'**) = 45.3 min,  $t_R$  (**5ab'**) = 53.3 min, 93:7 er (Si-OH product, **5ab**:**5ab'**). Absolute configuration was assigned to be (*S*, *S*) based on analogy to **5e** and **11**.

$^1\text{H NMR}$  (600 MHz,  $\text{CDCl}_3$ )  $\delta$  7.45 – 7.04 (m, 14H), 4.72 (q,  $J = 3.6$  Hz, 3H), 3.96 (d,  $J = 4.0$  Hz, 1H), 2.21 (s, 3H), 0.33 (d,  $J = 3.6$  Hz, 3H).  $^{13}\text{C NMR}$  (151 MHz,  $\text{CDCl}_3$ )  $\delta$  142.0, 140.5, 137.0, 135.1, 135.0, 139.0, 129.7, 129.6, 128.9, 128.3, 127.8, 126.1, 125.9, 125.2, 38.7, 20.3, -5.6.  $^{29}\text{Si NMR}$  (119 MHz,  $\text{CDCl}_3$ )  $\delta$  -10.2. MALDI  $m/z$  calc for  $\text{C}_{21}\text{H}_{22}\text{Si}$   $[\text{M} + \text{H}]^+$  303.156. Found 303.154.

### Racemic Standard for **5a**:

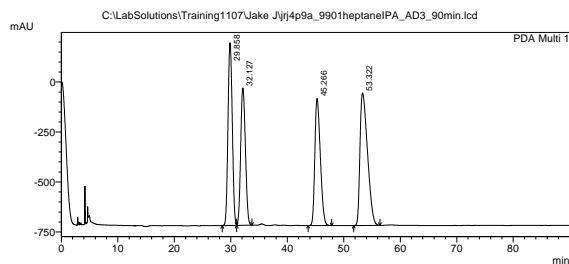

1 PDA Multi 1/208nm 4nm

< Peak Table >

PeakTable C:\LabSolutions\Training1107\Jake Jij4p9a\_9901heptaneIPA\_AD3\_90min.lcd

| Peak# | Ret. Time | Area      | Height  | Area %  | Height % |
|-------|-----------|-----------|---------|---------|----------|
| 1     | 29.858    | 48239523  | 914305  | 25.085  | 31.533   |
| 2     | 32.127    | 40004513  | 687079  | 20.802  | 23.696   |
| 3     | 46.266    | 42953904  | 635333  | 22.336  | 21.912   |
| 4     | 53.322    | 61108498  | 662816  | 31.777  | 22.859   |
| Total |           | 192306438 | 2899533 | 100.000 | 100.000  |

### Enantiomerically enriched (*S,S*) **5a** using *S*-TCPTTL:

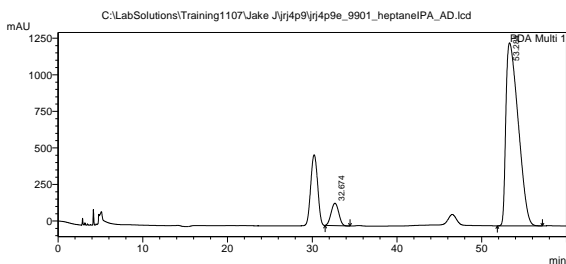

1 PDA Multi 1/205nm 4nm

< Peak Table >

PeakTable C:\LabSolutions\Training1107\Jake Jij4p9jij4p9e\_9901\_heptaneIPA\_AD.lcd

| Peak# | Ret. Time | Area      | Height  | Area %  | Height % |
|-------|-----------|-----------|---------|---------|----------|
| 1     | 32.674    | 9589640   | 153329  | 7.063   | 10.913   |
| 2     | 53.324    | 12602061  | 1251634 | 92.938  | 89.082   |
| Total |           | 135791101 | 1404963 | 100.000 | 100.000  |



# Enantiomerically enriched (*R,R*) **5a** using *R*-TCPTTL:

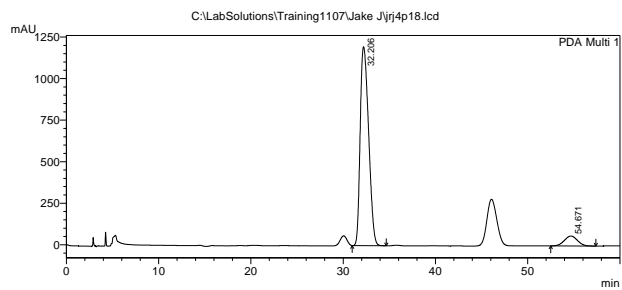

## < Peak Table >

PeakTable C:\LabSolutions\Training1107\Jake Jjrij4p18.lcd

| Peak# | Ret. Time | Area     | Height  | Area %  | Height % |
|-------|-----------|----------|---------|---------|----------|
| 1     | 32.206    | 75751446 | 1197113 | 92.871  | 95.280   |
| 2     | 54.671    | 5815274  | 59299   | 7.129   | 4.720    |
| Total |           | 81566720 | 1256412 | 100.000 | 100.000  |

### (S)-((S)-(2-methoxyphenyl)(phenyl)methyl)(methyl)(phenyl)silane (**5b**):

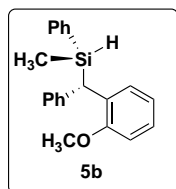

Synthesized using method F with diazo compound **3b** (0.2 mmol, 48.9 mg) to give a clear solid in 91% yield (0.182 mmol, 58.0 mg, 90:10 dr). Enantiomeric ratio was determined by HPLC after hydrolysis with a Daicel CHIRALPAK® AD-H column (2% IPA/ hexanes), 1.0 mL/min.  $t_R$  (**5ba**) = 26.6 min,  $t_R$  (**5bb**) = 29.0 min,  $t_R$  (**5ba'**) = 36.8 min,  $t_R$  (**5bb'**) = 42.9 min, 95:5 er (Si-OH product, **5ba'**:**5ba**) Absolute configuration was assigned to be (*S*, *S*) based on analogy to **5a**.

<sup>1</sup>H NMR (600 MHz, CDCl<sub>3</sub>) δ 7.33 (d, *J* = 7.6 Hz, 2H), 7.30 (d, *J* = 7.2 Hz, 1H), 7.24 (dt, *J* = 11.6, 5.4 Hz, 3H), 7.19 – 7.11 (m, 5H), 7.09 – 7.05 (m, 1H), 6.88 (t, *J* = 7.4 Hz, 1H), 6.82 (d, *J* = 8.2 Hz, 1H), 4.70 – 4.66 (m, 1H), 4.26 (d, *J* = 3.5 Hz, 1H), 3.72 (s, 3H), 0.25 (d, *J* = 3.4 Hz, 3H). <sup>13</sup>C NMR (151 MHz, CDCl<sub>3</sub>) δ 156.9, 142.5, 136.0, 134.9, 131.0, 130.2, 129.3, 129.2, 128.3, 127.7, 126.8, 125.2, 120.7, 110.6, 55.3, 35.3, -5.7.<sup>29</sup>Si NMR (76 MHz, CDCl<sub>3</sub>) δ -12.5. ESI-MS *m/z* calc for C<sub>21</sub>H<sub>22</sub>O<sub>2</sub>Si (Si-OH) [M - H]· 333.1316. Found: 333.1304.

### Racemic Standard for **5b**:

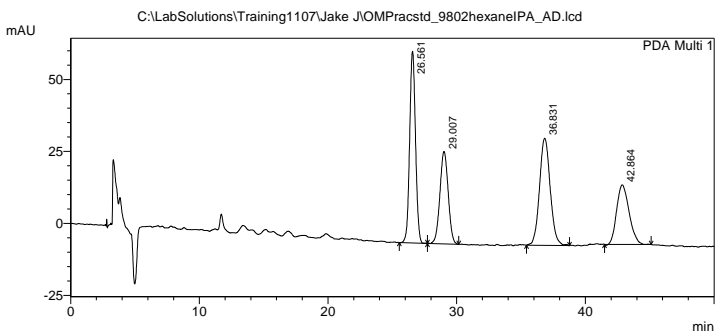

1 PDA Multi 1/273nm 4nm

< Peak Table >

PeakTable C:\LabSolutions\Training1107\Jake JIOMPracstd\_9802hexanelPA\_AD.lcd

| Peak# | Ret. Time | Area    | Height | Area %  | Height % |
|-------|-----------|---------|--------|---------|----------|
| 1     | 26.561    | 2108170 | 66513  | 29.761  | 42.517   |
| 2     | 29.007    | 1436247 | 32070  | 20.275  | 20.500   |
| 3     | 36.831    | 2148115 | 37141  | 30.325  | 23.741   |
| 4     | 42.864    | 1391142 | 20716  | 19.639  | 13.242   |
| Total |           | 7083674 | 156439 | 100.000 | 100.000  |

### Enantiomerically enriched (*S,S*) **5b** using *S*-TCPTTL:

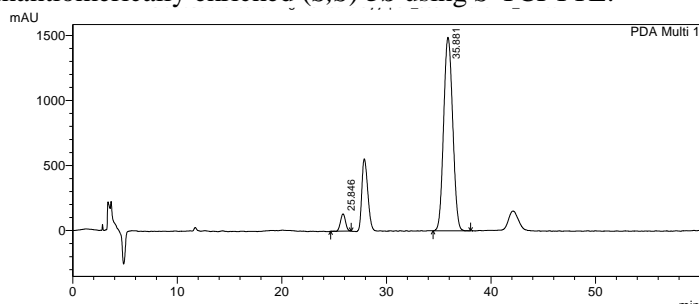

1 PDA Multi 1/206nm 4nm

< Peak Table >

PeakTable C:\LabSolutions\Training1107\Jake Jjij4p84\_9802hexanelPA\_AD.lcd

| Peak# | Ret. Time | Area     | Height  | Area %  | Height % |
|-------|-----------|----------|---------|---------|----------|
| 1     | 25.846    | 4372963  | 132933  | 4.655   | 8.202    |
| 2     | 35.881    | 89566615 | 1487798 | 95.345  | 91.798   |
| Total |           | 93939577 | 1620731 | 100.000 | 100.000  |

Enantiomerically enriched (*R,R*) **5b** using *R*-TCPTTL:

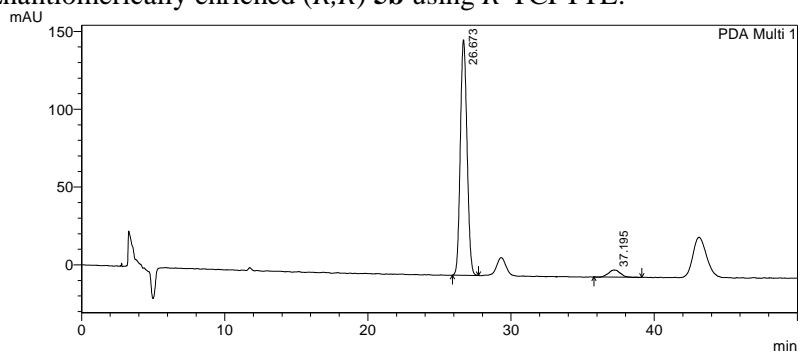

< Peak Table >

PeakTable C:\LabSolutions\Training1107\Jake J\jrj4p87\_9802HexIPA\_AD.lcd

PDA Ch1 274nm 4nm

| Peak# | Ret. Time | Area    | Height | Area %  | Height % |
|-------|-----------|---------|--------|---------|----------|
| 1     | 26.673    | 4936920 | 151331 | 95.059  | 97.064   |
| 2     | 37.195    | 256588  | 4577   | 4.941   | 2.936    |
| Total |           | 5193508 | 155909 | 100.000 | 100.000  |

### (S)-methyl(phenyl)((S)-phenyl(2-(trifluoromethyl)phenyl)methyl)silane (**5c**):

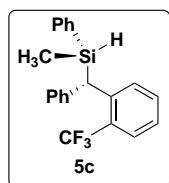

Synthesized using method F with diazo compound **3c** (0.2 mmol, 42.0 mg) to give a white solid in 93% yield (0.186 mmol, 66.3 mg, 98:2 dr (determined using  $^{19}\text{F}$  NMR). Enantiomeric ratio was determined by HPLC after hydrolysis with a Daicel CHIRALPAK  $\text{\textcircled{R}}$  AD-H column (2% IPA/ hexanes), 1.0 mL/min.  $t_{\text{R}}$  (**5ca**) = 14.7 min,  $t_{\text{R}}$  (**5cb**) = 15.7 min,  $t_{\text{R}}$  (**5cb'**) = 23.4 min,  $t_{\text{R}}$  (**5ca'**) = 26.6 min, 93:7 er (Si-OH product, **5cb'**:**5cb**). Absolute configuration was assigned to be (*S*, *S*) based on analogy to **5a**.

$^1\text{H}$  NMR (600 MHz,  $\text{CDCl}_3$ )  $\delta$  7.63 (dd,  $J = 12.3, 7.9$  Hz, 2H), 7.50 (t,  $J = 7.6$  Hz, 1H), 7.34 (d,  $J = 7.1$  Hz, 3H), 7.29 – 7.22 (m, 4H), 7.21 (d,  $J = 7.5$  Hz, 2H), 7.17 (t,  $J = 7.6$  Hz, 2H), 7.10 (t,  $J = 7.2$  Hz, 1H), 4.76 (p,  $J = 4.0$  Hz, 1H), 4.22 (d,  $J = 4.7$  Hz, 1H), 0.20 (d,  $J = 3.7$  Hz, 4H).  $^{13}\text{C}$  NMR (151 MHz,  $\text{CDCl}_3$ )  $\delta$  141.7, 141.7, 141.4, 134.9, 134.3, 131.9, 131.4, 129.8, 128.8, 128.5, 128.5 (q,  $J_{\text{CCF}} = 7.0$  Hz), 128.3, 128.1 (q,  $J_{\text{CCF}} = 36.0$  Hz), 127.9, 126.4 (q,  $J_{\text{CCF}} = 5.9$  Hz), 125.8, 125.7, 124.8 (q,  $J_{\text{CF}} = 274$  Hz), 37.80, -5.80.  $^{19}\text{F}$  NMR (376 MHz,  $\text{CDCl}_3$ )  $\delta$  -58.2.  $^{29}\text{Si}$  NMR (76 MHz,  $\text{CDCl}_3$ )  $\delta$  -9.2. MALDI  $m/z$  calc for  $\text{C}_{21}\text{H}_{19}\text{F}_3\text{Si}$  [ $\text{M} + \text{Na}$ ] $^+$  379.110. Found 379.100

### Racemic Standard for **5c**:

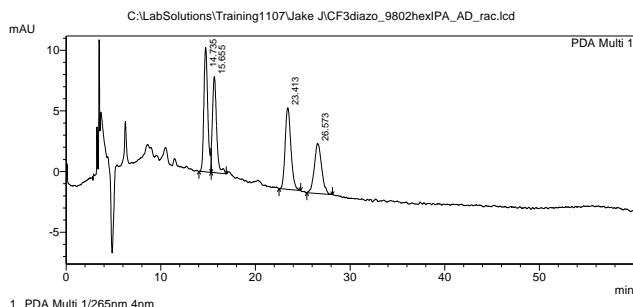

1 PDA Multi 1/265nm 4nm

< Peak Table >

| Peak# | Ret. Time | Area    | Height | Area %  | Height % |
|-------|-----------|---------|--------|---------|----------|
| 1     | 14.735    | 296985  | 10257  | 28.532  | 35.312   |
| 2     | 15.655    | 238179  | 7932   | 22.883  | 27.310   |
| 3     | 23.413    | 284555  | 6737   | 27.338  | 23.194   |
| 4     | 26.573    | 221156  | 4120   | 21.247  | 14.164   |
| Total |           | 1040875 | 29046  | 100.000 | 100.000  |

### Spectrum index for racemic standard of **5c**:

Peak# : 1  
Retention Time : 14.735

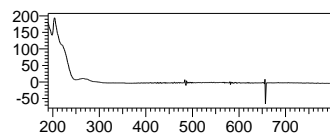

Peak# : 3  
Retention Time : 23.413

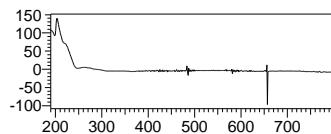

Peak# : 2  
Retention Time : 15.655

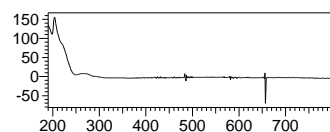

Peak# : 4  
Retention Time : 26.573

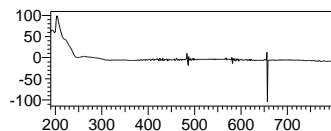

Enantiomerically enriched (*S,S*) **5c** using *S*-TCPTTL:

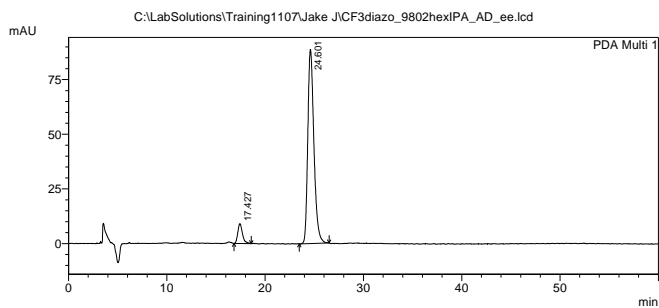

1 PDA Multi 1/266nm 4nm

< Peak Table >

PeakTable C:\LabSolutions\Training1107\Jake J\CF3diaz\_9802hexIPA\_AD\_ee.lcd

| Peak# | Ret. Time | Area    | Height | Area %  | Height % |
|-------|-----------|---------|--------|---------|----------|
| 1     | 17.427    | 301249  | 9119   | 7.286   | 9.308    |
| 2     | 24.601    | 3833358 | 88855  | 92.714  | 90.692   |
| Total |           | 4134607 | 97974  | 100.000 | 100.000  |

Spectrum index for enantioenriched sample of **5c**:

Peak# : 1  
Retention Time : 17.427

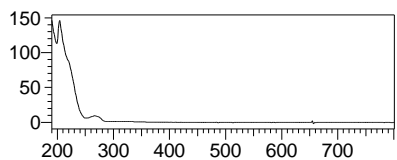

Peak# : 2  
Retention Time : 24.601

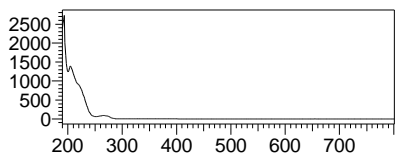

Spectrum indices between racemic standard and enantioenriched are identical, indicating the peaks are identical despite slightly different retention times.

## (*S*)-((*S*)-(2-chlorophenyl)(4-methoxyphenyl)methyl)(methyl)(phenyl)silane (**5d**)

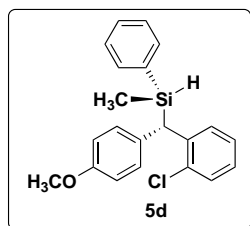

Synthesized using method F with diazo compound **3e** (0.2 mmol, 52.0 mg) to give a white solid in 98% yield (0.196 mmol, 69.0 mg, 90:10 dr. Enantiomeric ratio was determined by HPLC after hydrolysis with a Daicel CHIRALPAK® AD-H column (2% IPA/ heptane), 1.0 mL/min.  $t_r$  (**5da**) = 49.1 min,  $t_r$  (**5db**) = 52.5 min,  $t_r$  (**5da'**) = 55.0 min,  $t_r$  (**5db'**) = 87.0 min, 89:11 er (Si-OH product, **5da'**:**5da**) Absolute configuration was assigned to be (*S*, *S*) based on analogy to **5a**.

$^1\text{H NMR}$  (600 MHz,  $\text{CDCl}_3$ )  $\delta$  7.39 (m, 5H), 7.31 (t,  $J = 7.2$  Hz, 2H), 7.22 (t,  $J = 7.6$  Hz, 1H), 7.16 (d,  $J = 8.2$  Hz, 2H), 7.12 (t,  $J = 7.7$  Hz, 1H), 6.78 (d,  $J = 8.4$  Hz, 2H), 4.82–4.76 (m, 1H), 4.45 (d,  $J = 4.5$  Hz, 1H), 3.76 (s, 3H), 0.38 (d,  $J = 3.4$  Hz, 3H).  $^{13}\text{C NMR}$  (151 MHz,  $\text{CDCl}_3$ )  $\delta$  157.7, 140.7, 135.0, 134.6, 134.1, 133.3, 130.4, 130.3, 129.9, 129.7, 127.9, 127.0, 126.8, 113.9, 75.9, 53.2, 36.2, -5.2.  $^{29}\text{Si NMR}$  (79 MHz,  $\text{CDCl}_3$ )  $\delta$  -11.34. MALDI  $m/z$  calc for  $\text{C}_{21}\text{H}_{21}\text{ClOSi}$  [ $\text{M} - \text{H}$ ] $^+$  351.097. Found 351.083.

### Racemic Standard for **5d**:

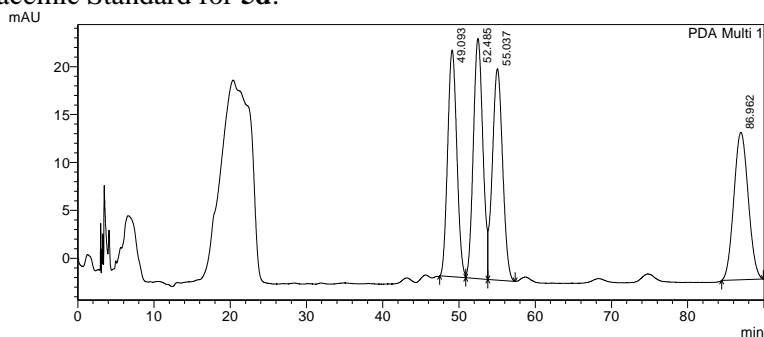

1 PDA Multi 1/233nm 4nm

#### < Peak Table >

PeakTable C:\LabSolutions\Training1107\Jake J\jrj4p185a\_9802hepIPA\_ADOnODvalve.lcd

| Peak# | Ret. Time | Area    | Height | Area %  | Height % |
|-------|-----------|---------|--------|---------|----------|
| 1     | 49.093    | 1980775 | 23674  | 24.047  | 27.467   |
| 2     | 52.485    | 2179913 | 25065  | 26.465  | 29.081   |
| 3     | 55.037    | 2060887 | 22061  | 25.020  | 25.596   |
| 4     | 86.962    | 2015386 | 15391  | 24.468  | 17.857   |
| Total |           | 8236960 | 86192  | 100.000 | 100.000  |

### Enantiomerically enriched (*S,S*) **5d** using *S*-TCPTTL:

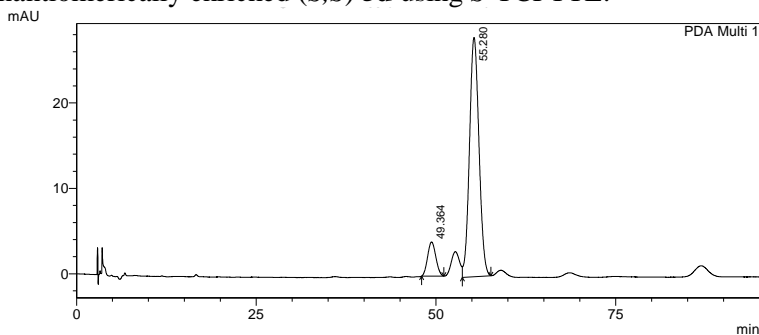

1 PDA Multi 1/254nm 4nm

#### < Peak Table >

PeakTable C:\LabSolutions\Training1107\Jake J\jrj4p185b\_9802hepIPA\_ADOnODvalve.lcd

| Peak# | Ret. Time | Area    | Height | Area %  | Height % |
|-------|-----------|---------|--------|---------|----------|
| 1     | 49.364    | 317147  | 3994   | 10.972  | 12.473   |
| 2     | 55.280    | 2573303 | 28030  | 89.028  | 87.527   |
| Total |           | 2890450 | 32024  | 100.000 | 100.000  |

Enantiomerically enriched (*R,R*) **5d** using *R*-TCPTTL:

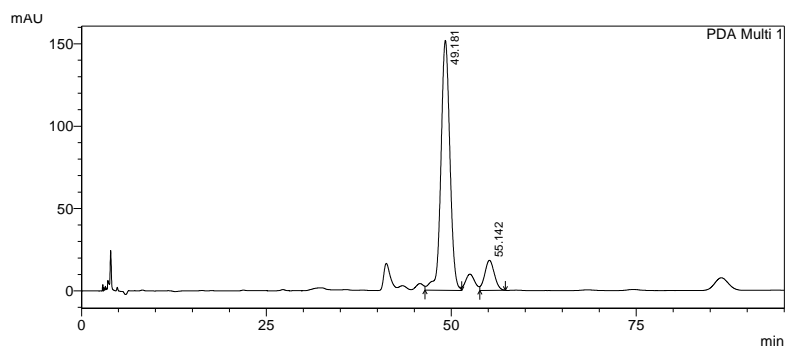

1 PDA Multi 1/233nm 4nm

< Peak Table >

PeakTable C:\LabSolutions\Training1107\Jake J\jrj4p185c\_9802hepIPA\_ADOnODvalve.lcd

| Peak# | Ret. Time | Area     | Height | Area %  | Height % |
|-------|-----------|----------|--------|---------|----------|
| 1     | 49.181    | 12792352 | 151676 | 88.662  | 89.256   |
| 2     | 55.142    | 1635909  | 18258  | 11.338  | 10.744   |
| Total |           | 14428261 | 169934 | 100.000 | 100.000  |

### (*S*)-methyl(*S*)-naphthalen-1-yl(phenyl)methyl(phenyl)silane (**5e**):

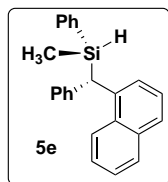

Synthesized using method F with diazo compound **3d** (0.2 mmol, 48.9 mg) to give a white solid in 78% yield (0.158 mmol, 52.8 mg, 85:15 dr). Enantiomeric ratio was determined by HPLC after hydrolysis with a Daicel CHIRALPAK® AD-H column (2% IPA/ hexanes), 1.0 mL/min.  $t_R$  (**5ea**) = 36.0 min,  $t_R$  (**5ea'**) = 46.3 min,  $t_R$  (**5eb**) = 50.8 min,  $t_R$  (**5eb'**) = 56.5 min, 61:39 er (Si-OH product, **5ea**:**5ea'**) Absolute configuration was assigned to be (*S*, *S*) based on analogy to **5a**.

<sup>1</sup>H NMR (600 MHz, CDCl<sub>3</sub>)  $\delta$  8.12 – 8.05 (m, 1H), 7.82 – 7.78 (m, 1H), 7.70 (d,  $J$  = 8.3 Hz, 1H), 7.62 (d,  $J$  = 7.1 Hz, 3H), 7.46 – 7.36 (m, 3H), 7.35 – 7.29 (m, 2H), 7.27 – 7.16 (m, 1H), 7.11 (m, 3H), 7.08 – 7.00 (m, 1H), 4.83 (p,  $J$  = 3.2 Hz, 1H), 4.56 (d,  $J$  = 4.2 Hz, 1H), 0.33 (d,  $J$  = 3.6 Hz, 3H). <sup>13</sup>C NMR (151 MHz, CDCl<sub>3</sub>)  $\delta$  142.3, 138.2, 135.1, 134.5, 132.8, 129.7, 129.0, 128.7, 128.5, 128.4, 127.8, 127.4, 126.9, 126.0, 125.6, 125.4, 125.3, 124.2, 38.1, -5.4.<sup>29</sup>Si NMR (119 MHz, CDCl<sub>3</sub>)  $\delta$  -10.0. Did not ionize using ESI, MALDI or APCI.

### Racemic Standard for **5e**:

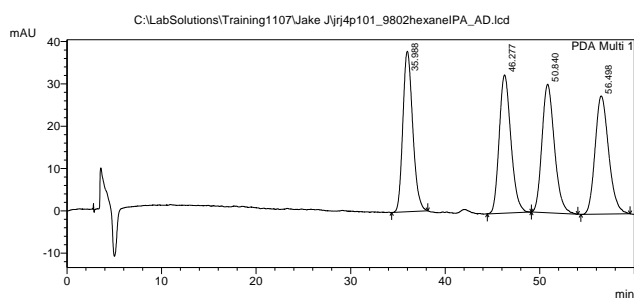

1 PDA Multi 1/284nm 4nm

< Peak Table >

PeakTable C:\LabSolutions\Training1107\Jake Jjirj4p101\_9802hexanelPA\_AD.lcd

| Peak# | Ret. Time | Area     | Height | Area %  | Height % |
|-------|-----------|----------|--------|---------|----------|
| 1     | 35.988    | 2750234  | 37927  | 24.688  | 29.426   |
| 2     | 46.277    | 2813267  | 32673  | 25.254  | 25.349   |
| 3     | 50.840    | 2789483  | 30380  | 25.041  | 23.570   |
| 4     | 56.498    | 2786868  | 27912  | 25.017  | 21.655   |
| Total |           | 11139853 | 128892 | 100.000 | 100.000  |

### Enantiomerically enriched (*S,S*) **5e** using *S*-TCPTTL:

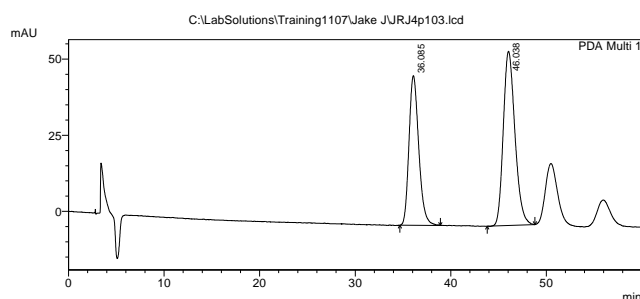

1 PDA Multi 1/283nm 4nm

< Peak Table >

PeakTable C:\LabSolutions\Training1107\Jake JJRJ4p103.lcd

| Peak# | Ret. Time | Area    | Height | Area %  | Height % |
|-------|-----------|---------|--------|---------|----------|
| 1     | 36.085    | 3479088 | 49147  | 41.817  | 46.219   |
| 2     | 46.038    | 4840630 | 57187  | 58.183  | 53.781   |
| Total |           | 8319718 | 106334 | 100.000 | 100.000  |



Enantiomerically enriched (*R,R*) **5e** using *R*-TCPTTL:

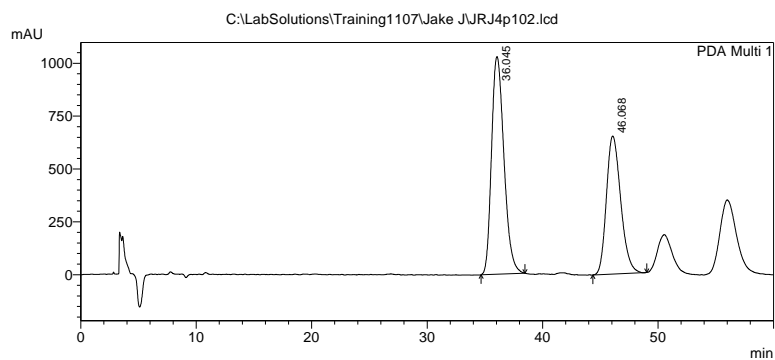

1 PDA Multi 1/222nm 4nm

< Peak Table >

PeakTable C:\LabSolutions\Training1107\Jake JJRJ4p102.lcd

| Peak# | Ret. Time | Area      | Height  | Area %  | Height % |
|-------|-----------|-----------|---------|---------|----------|
| 1     | 36.045    | 76982519  | 1029081 | 57.866  | 61.189   |
| 2     | 46.068    | 56053744  | 652716  | 42.134  | 38.811   |
| Total |           | 133036262 | 1681797 | 100.000 | 100.000  |

### (*S*)-(4-methoxyphenyl)(methyl)((*S*)-phenyl(*o*-tolyl)methyl)silane (**5f**):

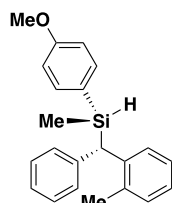

Synthesized using method F with diazo compound **3a** (0.2 mmol, 42.0 mg) to give a clear oil in 85% yield (0.170 mmol, 56.5 mg, 94:6 dr). Enantiomeric ratio was determined by HPLC after hydrolysis with a Daicel CHIRALPAK® AD-H column (1% IPA/ heptane), 1.0 mL/min.  $t_R$  (**5fa**) = 33.3 min,  $t_R$  (**5fb**) = 37.5 min,  $t_R$  (**5fa'**) = 47.5 min,  $t_R$  (**5fb'**) = 56.3 min, 93.5:6.5 er (Si-OH product, **5fb'**:**5fb**). Absolute configuration was assigned to be (*S,S*) based Tamao-Fleming oxidation results and analogy to **11**.

$^1\text{H}$  NMR (400 MHz,  $\text{CDCl}_3$ )  $\delta$  7.39 (d,  $J$  = 7.6 Hz, 2H), 7.04-7.23 (m, 4H), 6.80 (d,  $J$  = 7.9 Hz, 1H), 4.73 – 4.67 (m, 1H), 3.93 (d,  $J$  = 3.7 Hz, 1H), 3.79 (s, 1H), 2.22 (s, 1H), 0.31 (d,  $J$  = 3.5 Hz, 3H).  $^{13}\text{C}$  NMR (151 MHz,  $\text{CDCl}_3$ )  $\delta$  160.9, 142.13, 140.7, 137.0, 136.6, 130.9, 129.7, 128.9, 128.3, 126.0, 125.9, 125.7, 125.2, 113.6, 55.2, 39.0, 20.4, -5.4.  $^9\text{Si}$  NMR (119 MHz,  $\text{CDCl}_3$ )  $\delta$  -11.4. Did not ionize using ESI, MALDI or APCI.

### Racemic Standard for **5f**:

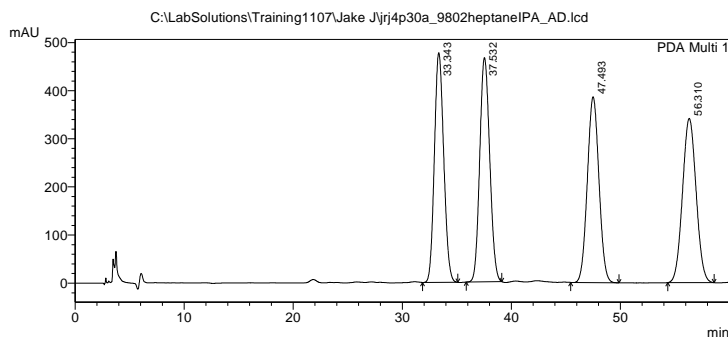

1 PDA Multi 1/230nm 4nm

< Peak Table >

PeakTable C:\LabSolutions\Training1107\Jake Jljrj4p30a\_9802heptaneIPA\_AD.Icd

| Peak# | Ret. Time | Area      | Height  | Area %  | Height % |
|-------|-----------|-----------|---------|---------|----------|
| 1     | 33.343    | 28394457  | 477248  | 24.430  | 28.566   |
| 2     | 37.532    | 29672263  | 466046  | 25.530  | 27.895   |
| 3     | 47.493    | 28590025  | 386124  | 24.598  | 23.111   |
| 4     | 56.310    | 29570529  | 341290  | 25.442  | 20.428   |
| Total |           | 116227274 | 1670708 | 100.000 | 100.000  |

### Enantiomerically enriched (*S,S*) **5f** using *S*-TCPTTL:

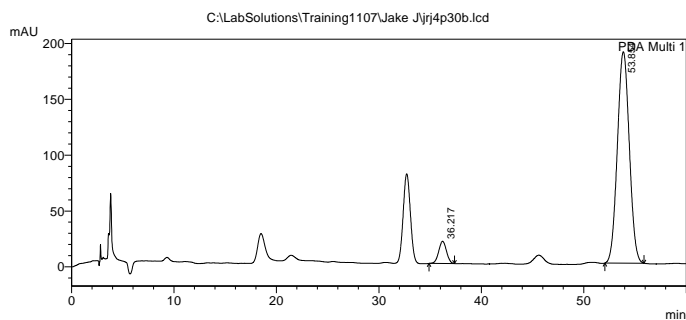

1 PDA Multi 1/229nm 4nm

< Peak Table >

PDA Ch1 229nm 4nm

| Peak# | Ret. Time | Area     | Height | Area %  | Height % |
|-------|-----------|----------|--------|---------|----------|
| 1     | 36.217    | 1055937  | 19918  | 6.437   | 9.516    |
| 2     | 53.854    | 15348653 | 189387 | 93.563  | 90.484   |
| Total |           | 16404589 | 209306 | 100.000 | 100.000  |

# Enantiomerically enriched (*R,R*) **5f** using *R*-TCPTTL:

## <Chromatogram>

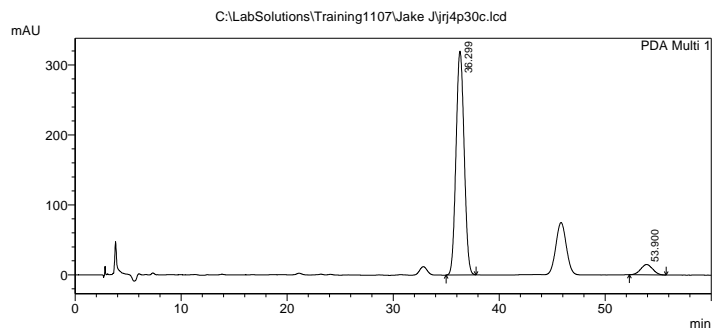

## < Peak Table >

PeakTable C:\LabSolutions\Training1107\Jake Jjirj4p30c.lcd

PDA Ch1 232nm 4nm

| Peak# | Ret. Time | Area     | Height | Area %  | Height % |
|-------|-----------|----------|--------|---------|----------|
| 1     | 36.299    | 17064389 | 319925 | 93.596  | 95.572   |
| 2     | 53.900    | 1167520  | 14823  | 6.404   | 4.428    |
| Total |           | 18231909 | 334749 | 100.000 | 100.000  |

**(S)-(4-fluorophenyl)(methyl)((S)-phenyl(*o*-tolyl)methyl)silane (**5g**):**

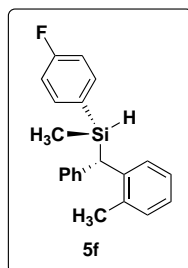

Synthesized using method F with diazo compound **3a** (0.2 mmol, 42.0 mg) to give an oil in 90% yield (0.180 mmol, 57.7 mg, 90:10 dr). Enantiomeric ratio was determined by HPLC after hydrolysis with a Daicel CHIRALPAK® AD-H column (2% IPA/hexanes), 1.0 mL/min.  $t_R$  (**5ga**) = 36.0 min,  $t_R$  (**5gb**) = 46.3 min,  $t_R$  (**5ga'**) = 50.8 min,  $t_R$  (**5gb'**) = 56.5 min, 61:39 er (Si-OH product, **5gb'**:**5gb**) Absolute configuration was assigned to be (*S*, *S*) based on analogy to **5a**.

$^1\text{H}$  NMR (600 MHz,  $\text{CDCl}_3$ )  $\delta$  7.43 (dd,  $J = 7.6, 1.4$  Hz, 1H), 7.30 – 7.23 (m, 2H), 7.23 – 7.15 (m, 4H), 7.15 – 7.05 (m, 4H), 7.01 – 6.94 (m, 2H), 4.76 (p,  $J = 3.7$  Hz, 1H), 3.96 (d,  $J = 4.1$  Hz, 1H), 2.24 (s, 3H), 0.37 (d,  $J = 3.7$  Hz, 3H).  $^{13}\text{C}$  NMR (151 MHz,  $\text{CDCl}_3$ )  $\delta$  164.1 (d,  $J_{CF} = 248.9$  Hz), 141.8, 140.26, 137.0 (d,  $J_{CCF} = 7.5$  Hz), 137.0, 130.9, 129.6, 128.9, 128.5, 128.4, 126.1, 126.0, 125.3, 115.0 (d,  $J_{CCF} = 19.7$  Hz), 38.8, 20.3, -5.5.  $^{19}\text{F}$  NMR (376 MHz,  $\text{CDCl}_3$ )  $\delta$  -110.97.  $^{29}\text{Si}$  NMR (76 MHz,  $\text{CDCl}_3$ )  $\delta$  -10.9. MALDI  $m/z$  calc for  $\text{C}_{21}\text{H}_{21}\text{FSi}$  [ $\text{M} + \text{Na}$ ] $^+$  343.129. Found 343.134.

**Racemic Standard for 5g:**

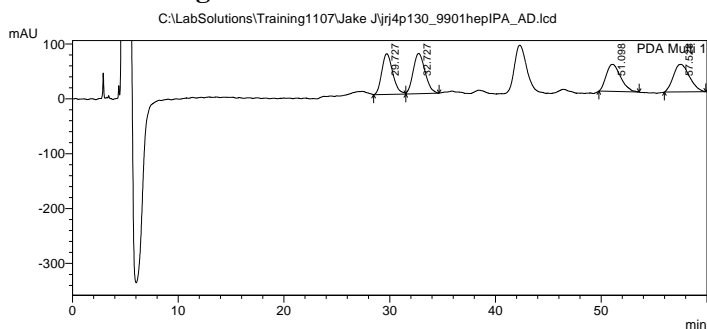

1 PDA Multi 1/203nm 4nm

< Peak Table >

PeakTable C:\LabSolutions\Training1107\Jake Jjrrj4p130\_9901hepIPA\_AD.lcd

| Peak# | Ret. Time | Area     | Height | Area %  | Height % |
|-------|-----------|----------|--------|---------|----------|
| 1     | 29.727    | 5340505  | 74092  | 25.353  | 29.986   |
| 2     | 32.727    | 5722663  | 73381  | 27.167  | 29.498   |
| 3     | 51.098    | 4693375  | 49413  | 22.281  | 19.998   |
| 4     | 57.528    | 5308366  | 50207  | 25.200  | 20.319   |
| Total |           | 21064908 | 247094 | 100.000 | 100.000  |

**Enantiomerically enriched (*S,S*) 5g using *S*-TCPTTL:**

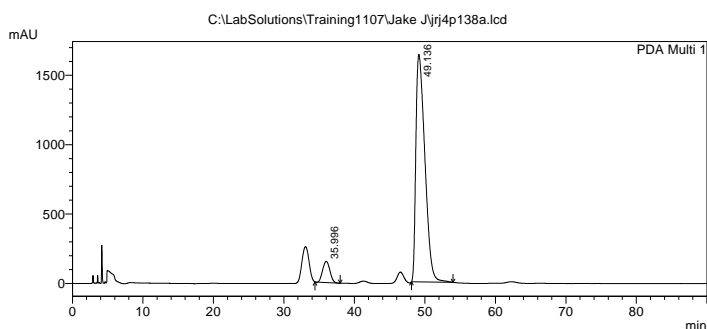

1 PDA Multi 1/203nm 4nm

< Peak Table >

PeakTable C:\LabSolutions\Training1107\Jake Jjrrj4p138a.lcd

| Peak# | Ret. Time | Area      | Height  | Area %  | Height % |
|-------|-----------|-----------|---------|---------|----------|
| 1     | 35.996    | 10899260  | 152350  | 6.957   | 8.501    |
| 2     | 49.136    | 145765515 | 1639890 | 93.043  | 91.499   |
| Total |           | 156664775 | 1792240 | 100.000 | 100.000  |

## Enantiomerically enriched (*R,R*) **5g** using *R*-TCPTTL:

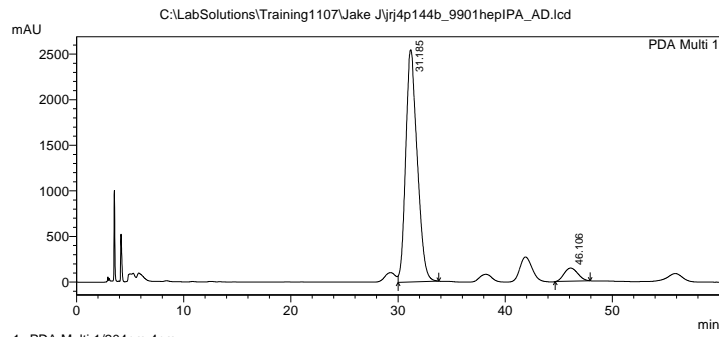

### < Peak Table >

PeakTable C:\LabSolutions\Training1107\Jake Jjij4p144b\_9901hepIPA\_AD.lcd

| Peak# | Ret. Time | Area      | Height  | Area %  | Height % |
|-------|-----------|-----------|---------|---------|----------|
| 1     | 31.185    | 189219089 | 2547395 | 93.621  | 94.628   |
| 2     | 46.106    | 12893569  | 144617  | 6.379   | 5.372    |
| Total |           | 202112657 | 2692012 | 100.000 | 100.000  |

### (*S*)-methyl(naphthalen-2-yl)((*S*)-phenyl(*o*-tolyl)methyl)silane (**5h**):

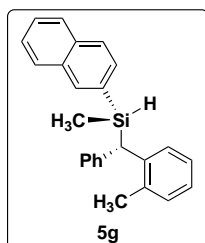

Synthesized using method F with diazo compound **3a** (0.2 mmol, 42.0 mg) to give a white solid in 95% yield (0.190 mmol, 66.9 mg, 91:9 dr). Enantiomeric ratio was determined by HPLC after hydrolysis with a Daicel CHIRALPAK® AD-H column (1% IPA/ heptane), 1.0 mL/min.  $t_R$  (**5ha**) = 57.1 min,  $t_R$  (**5hb**) = 62.8 min,  $t_R$  (**5ha'**) = 86.4 min,  $t_R$  (**5hb'**) = 113.1 min, 92:8 er (Si-OH product, **5hb'**:**5hb**) Absolute configuration was assigned to be (*S*, *S*) based on analogy to **5a**.

$^1\text{H}$  NMR (600 MHz,  $\text{CDCl}_3$ )  $\delta$  7.85 (m, 2H), 7.77 (dd,  $J = 12.3, 8.0$  Hz, 2H), 7.55 – 7.48 (m, 3H), 7.35 (d,  $J = 8.1$  Hz, 1H), 7.21 (td,  $J = 15.6, 14.8, 7.9$  Hz, 4H), 7.17 – 7.09 (m, 4H), 4.93 (p,  $J = 3.8$  Hz, 1H), 4.11 (d,  $J = 3.7$  Hz, 1H), 2.29 (s, 3H), 0.48 (d,  $J = 3.5$  Hz, 3H).  $^{13}\text{C}$  NMR (151 MHz,  $\text{CDCl}_3$ )  $\delta$  141.9, 140.5, 137.0, 136.2, 134.0, 132.9, 132.5, 131.0, 130.9, 129.7, 128.9, 128.4, 128.2, 127.8, 126.9, 126.7, 126.1, 126.0, 126.0, 125.3, 38.8, 20.4, -5.4.  $^{29}\text{Si}$  NMR (119 MHz,  $\text{CDCl}_3$ )  $\delta$  -10.1. MALDI  $m/z$  calc for  $\text{C}_{25}\text{H}_{24}\text{Si}$  [ $\text{M} + \text{Na}$ ] $^+$  375.154. Found 375.166.

### Racemic Standard for **5h**:

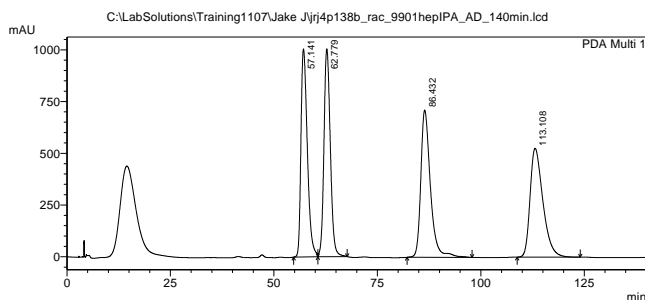

1 PDA Multi 1/229nm 4nm

< Peak Table >

PeakTable C:\LabSolutions\Training1107\Jake J\j4p138b\_rac\_9901hepiPA\_AD\_140min.lcd

| Peak# | Ret. Time | Area      | Height  | Area %  | Height % |
|-------|-----------|-----------|---------|---------|----------|
| 1     | 57.141    | 107678104 | 1005424 | 24.285  | 30.955   |
| 2     | 62.779    | 107704834 | 1004970 | 24.291  | 30.941   |
| 3     | 86.432    | 115186832 | 711986  | 25.978  | 21.921   |
| 4     | 113.108   | 112830097 | 525615  | 25.447  | 16.183   |
| Total |           | 443399867 | 3247994 | 100.000 | 100.000  |

### Enantiomerically enriched (*S,S*) **5h** using *S*-TCPTTL:

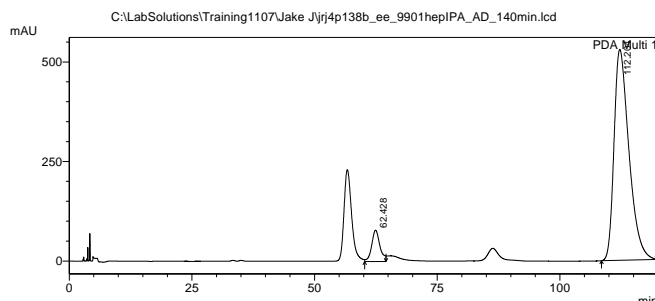

1 PDA Multi 1/222nm 4nm

< Peak Table >

PeakTable C:\LabSolutions\Training1107\Jake J\j4p138b\_ee\_9901hepiPA\_AD\_140min.lcd

| Peak# | Ret. Time | Area      | Height | Area %  | Height % |
|-------|-----------|-----------|--------|---------|----------|
| 1     | 62.428    | 9205162   | 78804  | 7.609   | 12.948   |
| 2     | 112.204   | 111770364 | 529829 | 92.391  | 87.052   |
| Total |           | 120975526 | 608633 | 100.000 | 100.000  |

Enantiomerically enriched (*R,R*) **5h** using *R*-TCPTTL:

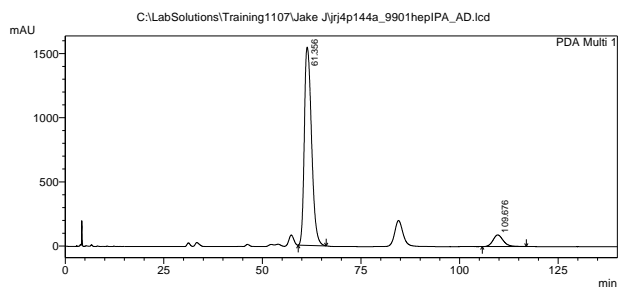

1 PDA Multi 1/229nm 4nm

< Peak Table >

PeakTable C:\LabSolutions\Training1107\Jake Jjij4p144a\_9901hepIPA\_AD.lcd

| Peak# | Ret. Time | Area      | Height  | Area %  | Height % |
|-------|-----------|-----------|---------|---------|----------|
| 1     | 61.356    | 196868375 | 1545840 | 92.289  | 94.460   |
| 2     | 109.676   | 16447848  | 90670   | 7.711   | 5.540    |
| Total |           | 213316223 | 1636509 | 100.000 | 100.000  |

### (*S*)-methyl(naphthalen-1-yl)((*S*)-phenyl(*o*-tolyl)methyl)silane (**5i**):

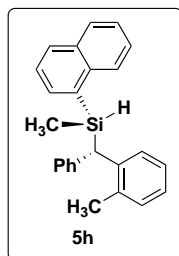

Synthesized using method F with diazo compound **3a** (0.2 mmol, 42.0 mg) to give a white solid in 55% yield (0.11 mmol, 38.8 mg, 82:18 dr. Enantiomeric ratio was determined by HPLC after hydrolysis with a Daicel CHIRALPAK® AD-H column (2% IPA/ heptane), 1.0 mL/min.  $t_R$  (**5ia**) = 23.9 min,  $t_R$  (**5ib**) = 25.5 min,  $t_R$  (**5ia'**) = 41.6 min,  $t_R$  (**5ib'**) = 50.4 min, 92:8 er (Si-OH product, **5ia'**:**5ia**) Absolute configuration was assigned to be (*S*, *S*) based on analogy to **5a**.

<sup>1</sup>H NMR (400 MHz, CDCl<sub>3</sub>)  $\delta$  7.90 – 7.75 (m, 4H), 7.57 (d,  $J$  = 6.7 Hz, 1H), 7.53 – 7.38 (m, 3H), 7.34 (dt,  $J$  = 8.5, 4.5 Hz, 2H), 7.15 (t,  $J$  = 7.2 Hz, 2H), 7.08 (m, 2H), 7.02 (m, 1H), 6.95 (m, 1H), 5.16 (p,  $J$  = 4.1 Hz, 1H), 4.23 (d,  $J$  = 4.5 Hz, 1H), 2.17 (s, 3H), 0.45 (d,  $J$  = 3.8 Hz, 3H). NMR (101 MHz, CDCl<sub>3</sub>)  $\delta$  142.3, 14.0, 137.2, 136.9, 135.2, 133.5, 133.3, 130.9, 130.4, 129.8, 127.0, 128.7, 128.3, 127.7, 126.1, 126.0, 125.9, 125.6, 125.2, 125.1, 38.5, 20.3, -4.64.<sup>29</sup>Si NMR (119 MHz, CDCl<sub>3</sub>)  $\delta$  -10.6. MALDI  $m/z$  calc for C<sub>25</sub>H<sub>24</sub>Si [M + Na]<sup>+</sup> 375.154. Found 375.163.

### Racemic Standard for **5i**:

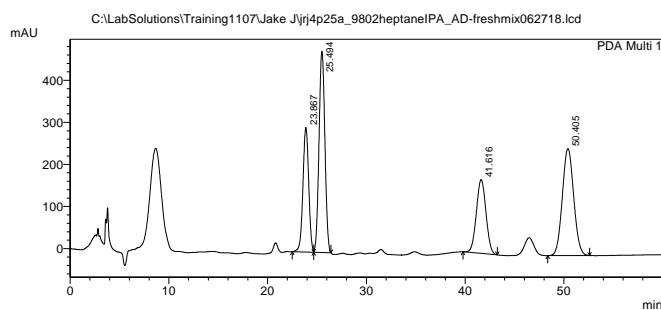

1 PDA Multi 1/225nm 4nm

< Peak Table >

PeakTable C:\LabSolutions\Training1107\Jake Jjirj4p25a\_9802heptanelPA\_AD-freshmix062718.lcd

| Peak# | Ret. Time | Area     | Height  | Area %  | Height % |
|-------|-----------|----------|---------|---------|----------|
| 1     | 23.867    | 11999034 | 296453  | 18.768  | 24.617   |
| 2     | 25.494    | 19735208 | 478133  | 30.868  | 39.703   |
| 3     | 41.616    | 11911651 | 175483  | 18.631  | 14.572   |
| 4     | 50.405    | 20288125 | 254205  | 31.733  | 21.109   |
| Total |           | 63934018 | 1204274 | 100.000 | 100.000  |

### Enantiomerically enriched (*S,S*) **5i** using *S*-TCPTTL:

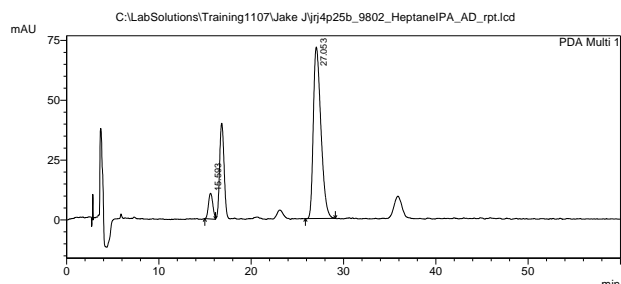

1 PDA Multi 1/254nm 4nm

< Peak Table >

PeakTable C:\LabSolutions\Training1107\Jake Jjirj4p25b\_9802\_HeptanelPA\_AD\_rpt.lcd

| Peak# | Ret. Time | Area    | Height | Area %  | Height % |
|-------|-----------|---------|--------|---------|----------|
| 1     | 15.593    | 350639  | 10711  | 7.891   | 13.008   |
| 2     | 27.053    | 4093054 | 71632  | 92.109  | 86.992   |
| Total |           | 4443693 | 82343  | 100.000 | 100.000  |



**(S)-(4-fluoronaphthalen-1-yl)(methyl)((S)-phenyl(*o*-tolyl)methyl)silane (**5j**):**

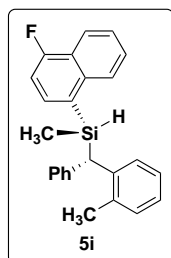

Synthesized using method F with diazo compound **3a** (0.2 mmol, 42.0 mg) to give a white solid in 66% yield (0.132 mmol, 48.9 mg, 84:16 dr. Enantiomeric ratio was determined by HPLC after hydrolysis with a Daicel CHIRALPAK® AD-H column (2% IPA/heptane), 1.0 mL/min.  $t_R$  (**5ja**) = 35.0 min,  $t_R$  (**5jb**) = 37.9 min,  $t_R$  (**5ja'**) = 59.8 min,  $t_R$  (**5jb'**) = 65.6 min, 92:8 er (Si-OH product, **5ja'**:**5ja**) Absolute configuration was assigned to be (*S*, *S*) based on analogy to **5a**.

$^1\text{H}$  NMR (400 MHz,  $\text{CDCl}_3$ )  $\delta$  8.18 (d,  $J$  = 8.3 Hz, 1H), 7.94 (d,  $J$  = 8.5 Hz, 1H), 7.59 – 7.42 (m, 4H), 7.25 – 7.00 (m, 9H), 5.20 (q,  $J$  = 5.9, 4.0 Hz, 1H), 4.24 (d,  $J$  = 4.4 Hz, 1H), 2.23 (s, 3H), 0.52 (d,  $J$  = 3.5 Hz, 3H).  $^{13}\text{C}$  NMR (101 MHz,  $\text{CDCl}_3$ )  $\delta$  160.5 (d,  $J_{\text{CF}}$  = 255.0 Hz), 140.2, 136.8, 135.2 (d,  $J_{\text{CCF}}$  = 8.3 Hz), 130.9, 129.66, 129.1 (d,  $J_{\text{CCF}}$  = 4.9 Hz), 128.7, 128.6, 128.4, 128.2, 127.4 (d,  $J_{\text{CCF}}$  = 3.2 Hz), 126.8, 126.0, 125.9, 125.8 (d,  $J_{\text{CCCF}}$  = 1.6 Hz), 125.1, 123.7 (d,  $J_{\text{CCF}}$  = 15.0 Hz), 121.1 (d,  $J_{\text{CCF}}$  = 6.3 Hz), 108.9 (d,  $J_{\text{CCF}}$  = 18.5 Hz), 38.5, 20.2, -4.8.  $^{19}\text{F}$  NMR (376 MHz,  $\text{CDCl}_3$ )  $\delta$  -120.35.  $^{29}\text{Si}$  NMR (76 MHz,  $\text{CDCl}_3$ )  $\delta$  -12.7 MALDI  $m/z$  calc for  $\text{C}_{25}\text{H}_{23}\text{FSi}$  [ $\text{M} + \text{H}$ ] $^+$  371.163. Found 371.151.

**Racemic Standard for 5j:**

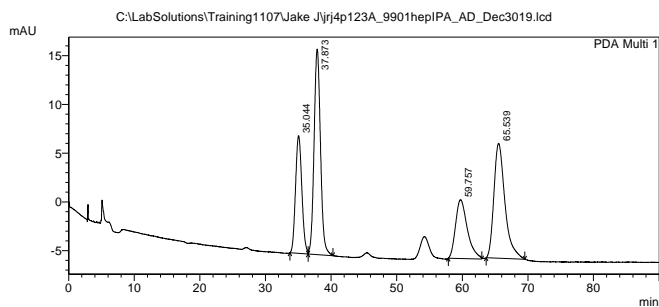

1 PDA Multi 1/287nm 4nm

< Peak Table >

PeakTable C:\LabSolutions\Training1107\Jake Jjirj4p123A\_9901hepIPA\_AD\_Dec3019.lcd

| Peak# | Ret. Time | Area    | Height | Area %  | Height % |
|-------|-----------|---------|--------|---------|----------|
| 1     | 35.044    | 807448  | 12083  | 18.458  | 23.694   |
| 2     | 37.873    | 1433974 | 21093  | 32.780  | 41.363   |
| 3     | 59.757    | 756270  | 6031   | 17.288  | 11.826   |
| 4     | 65.539    | 1376912 | 11788  | 31.475  | 23.117   |
| Total |           | 4374605 | 50995  | 100.000 | 100.000  |

**Enantiomerically enriched (*S,S*) 5j using *S*-TCPTTL:**

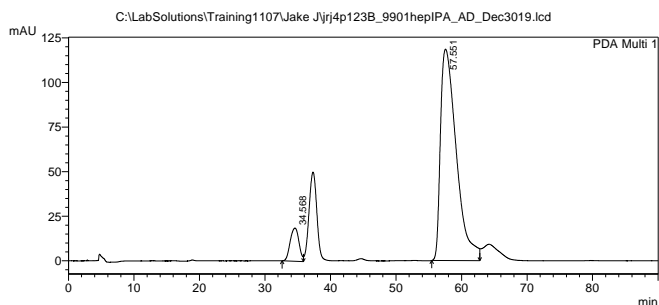

1 PDA Multi 1/286nm 4nm

< Peak Table >

PeakTable C:\LabSolutions\Training1107\Jake Jjirj4p123B\_9901hepIPA\_AD\_Dec3019.lcd

| Peak# | Ret. Time | Area     | Height | Area %  | Height % |
|-------|-----------|----------|--------|---------|----------|
| 1     | 34.568    | 1735561  | 18627  | 8.022   | 13.578   |
| 2     | 57.551    | 19900422 | 118563 | 91.978  | 86.422   |
| Total |           | 21635983 | 137190 | 100.000 | 100.000  |

## Functionalization Products and Miscellaneous:

### 1,2-bis(diphenylmethylene)hydrazine (6):

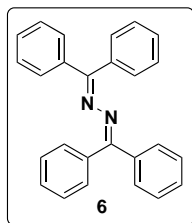

Spectrum matches previous report.<sup>17</sup>

<sup>1</sup>H NMR (600 MHz, CDCl<sub>3</sub>)  $\delta$  7.47 (d,  $J$  = 7.7 Hz, 4H), 7.39 (dt,  $J$  = 11.4, 6.5 Hz, 6H), 7.36 – 7.31 (m, 6H), 7.27 (t,  $J$  = 7.5 Hz, 4H).

### (1*E*,2*E*)-1,2-bis(phenyl(*o*-tolyl)methylene)hydrazine (7):

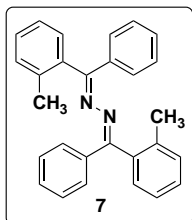

Observed and isolated during kinetics experiments as a yellow solid.

<sup>1</sup>H NMR (600 MHz, CDCl<sub>3</sub>)  $\delta$  7.37 (m, 4H), 7.29 (m, 6H), 7.22 (m, 6H), 2.23 (s, 6H). <sup>13</sup>C NMR (151 MHz, CDCl<sub>3</sub>)  $\delta$  137.8, 136.6, 130.3, 123.0, 129.9, 128.3, 128.3, 128.2, 128.0, 125.4, 20.2

## (*R*)-methyl(phenyl)((*S*)-phenyl(*o*-tolyl)methyl)silanol (**9**):

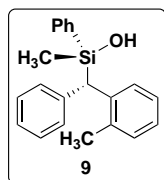

Synthesized using method K **5a** (0.33 mmol, 100.0 mg) to give a clear oil in 90% yield (0.3 mmol, 94.5 mg, 93:7 dr). Enantiomeric ratio was determined by HPLC with a Daicel CHIRALPAK® AD-H column (1% IPA/ heptane), 1.0 mL/min.  $t_R$  (**9a**) = 29.9 min,  $t_R$  (**9b**) = 32.1 min,  $t_R$  (**9a'**) = 45.3 min,  $t_R$  (**9b'**) = 53.3 min, 93:7 er (**9b**:**9b'**). Absolute configuration was assigned to be (*R*, *S*) based on analogy to **5a**, and formed through a retentive process.<sup>11</sup>

<sup>1</sup>H NMR (400 MHz, C<sub>6</sub>D<sub>6</sub>)  $\delta$  7.70 (d,  $J$  = 7.6 Hz, 1H), 7.36 (d,  $J$  = 7.9 Hz, 2H), 7.26 (d,  $J$  = 7.6 Hz, 2H), 7.12 – 7.06 (m, 5H), 7.05 – 6.88 (m, 4H), 3.96 (s, 1H), 2.03 (s, 3H), 1.57 (s, 1H), 0.29 (s, 1H). <sup>13</sup>C NMR (151 MHz, CDCl<sub>3</sub>)  $\delta$  141.3, 139.7, 137.1, 136.9, 134.0, 130.9, 130.0, 129.9, 129.0, 128.4, 127.8, 126.0, 125.9, 125.4, 41.6, 20.4, -1.6. <sup>29</sup>Si NMR (79 MHz, CDCl<sub>3</sub>)  $\delta$  1.66. MALDI  $m/z$  calc for C<sub>22</sub>H<sub>22</sub>Si [M + Na]<sup>+</sup> 341.1332. Found 341.212.

## Racemic Standard for **9**:

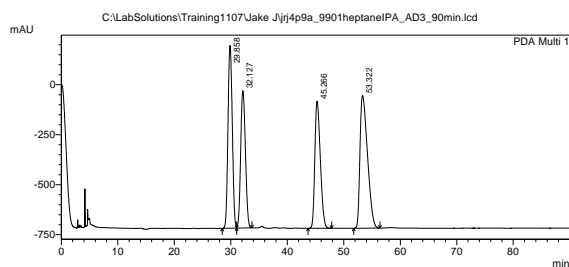

1 PDA Multi 1/208nm 4nm

< Peak Table >

PeakTable C:\LabSolutions\Training\1107\Jake Jijj4p9a\_9901heptaneIPA\_AD3\_90min.lcd

| Peak# | Ret. Time | Area      | Height  | Area %  | Height % |
|-------|-----------|-----------|---------|---------|----------|
| 1     | 29.858    | 48239523  | 914305  | 25.085  | 31.533   |
| 2     | 32.127    | 40004513  | 687079  | 20.802  | 23.696   |
| 3     | 45.266    | 42953904  | 635333  | 22.336  | 21.912   |
| 4     | 53.322    | 61108498  | 662810  | 31.777  | 22.859   |
| Total |           | 192306438 | 2899533 | 100.000 | 100.000  |

## Enantiomerically enriched (*S,S*) **9** using *S*-TCPTTL:

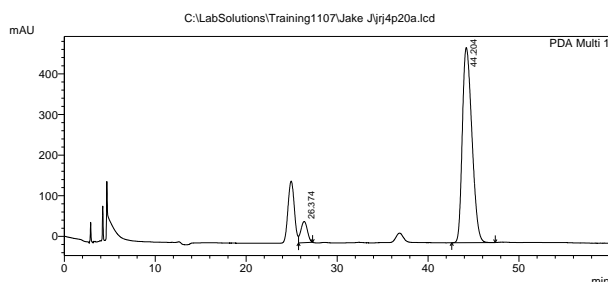

1 PDA Multi 1/204nm 4nm

< Peak Table >

PeakTable C:\LabSolutions\Training\1107\Jake Jijj4p20a.lcd

| Peak# | Ret. Time | Area     | Height | Area %  | Height % |
|-------|-----------|----------|--------|---------|----------|
| 1     | 26.374    | 2588118  | 52218  | 6.858   | 9.805    |
| 2     | 44.204    | 35149381 | 480353 | 93.142  | 90.195   |
| Total |           | 37737499 | 532571 | 100.000 | 100.000  |

**(R)-((E)-4-fluorostyryl)(methyl)(phenyl)((S)-phenyl(o-tolyl)methyl)silane (10):**

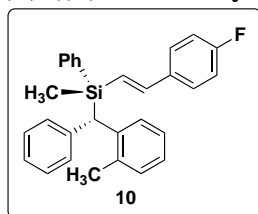

Synthesized using method L with **5a** (0.33 mmol, 100.0 mg) to give a clear oil in 62% yield (104.1 mg, 85:15 **10:10'**, 93:7 dr). Absolute configuration was assigned to be (*R*, *S*) based on analogy to **5a** and assuming retention of configuration.<sup>11</sup> The *E* isomer was assigned based off *J* values of the alkene protons. Could not separate using CSP-HPLC.

<sup>1</sup>H NMR (600 MHz, CDCl<sub>3</sub>) δ 7.41 – 7.32 (m, 6H), 7.29 (m 2H), 7.20 – 7.13 (m, 3H), 7.13 – 7.06 (m, 4H), 7.02 (m, 3H), 6.81 (d, *J* = 19.2 Hz, 1H), 6.50 (d, *J* = 19.2 Hz, 1H), 4.11 (s, 1H), 2.22 (s, 3H), 0.46 (s, 3H). <sup>13</sup>C NMR (151 MHz, CDCl<sub>3</sub>) δ 162.9 (d, *J*<sub>CF</sub> = 250.4 Hz), 145.8, 141.7, 140.5, 137.0, 136.8, 135.0, 130.9, 130.3, 129.4, 129.1, 128.9, 128.4, 128.3, 128.2, 127.8, 125.8 (d, *J*<sub>CCCF</sub> = 6.3 Hz), 125.1, 124.1 (d, *J*<sub>CCCCF</sub> = 2.3 Hz), 115.6 (d, *J*<sub>CCF</sub> = 21.6 Hz), 40.1, 20.4, -3.9. MALDI *m/z* calc for C<sub>29</sub>H<sub>27</sub>FSi [M + H<sub>3</sub>O]<sup>+</sup>. 441.204. Found 441.158. <sup>19</sup>F NMR (376 MHz, CDCl<sub>3</sub>) δ -113.3. <sup>29</sup>Si NMR (79 MHz, CDCl<sub>3</sub>) δ -12.0.

**(1*S*,2*R*)-2-methyl-1,2-diphenyl-2,3-dihydro-1*H*-benzo[*c*]silole (11):**

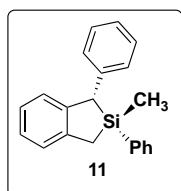

Synthesized using method J with **5a** (0.33 mmol, 100.0 mg) to give a clear oil in 90% yield (0.3 mmol, 89.2 mg, 90:10 dr). Absolute configuration was assigned to be (*S*, *S*) based on analogy to **5f**, and <sup>1</sup>H NOESY experiments. Could not separate using CSP-HPLC.

<sup>1</sup>H NMR (600 MHz, CDCl<sub>3</sub>) δ 7.46 (d, *J* = 7.6 Hz, 1H), 7.32 – 7.20 (m, 1H), 7.19 – 7.12 (m, 4H), 7.08 (d, *J* = 7.6 Hz, 2H), 7.01 (d, *J* = 7.2 Hz, 1H), 6.75 (d, *J* = 8.4 Hz, 2H), 3.91 (s, 1H), 2.66 (d, *J* = 17.3 Hz, 1H), 2.34 (d, *J* = 17.3 Hz, 1H), 0.63 (s, 3H). <sup>13</sup>C NMR (151 MHz, CDCl<sub>3</sub>) δ 144.8, 142.9, 142.1, 134.5, 129.6, 129.0, 128.9, 128.1, 127.9, 127.6, 126.6, 124.3, 43.4, 18.9, -4.6. <sup>29</sup>Si NMR (79 MHz, CDCl<sub>3</sub>) δ 15.7. MALDI *m/z* calc for C<sub>21</sub>H<sub>20</sub>Si [M + Na]<sup>+</sup> 323.123. Found 323.166.

**(*S*)-phenyl(*o*-tolyl)methanol (**S1**)**

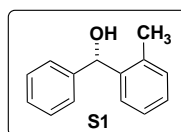

Synthesized using procedure for Tamao-Fleming oxidation. HPLC retention times match previously reported syntheses. Enantiomeric ratio was determined by HPLC with a Daicel CHIRALPAK ® OD-H column (2% IPA/ hexanes), 0.5 mL/min. *t*<sub>R</sub> (**S1a**) = 20.4 min, *t*<sub>R</sub> (**S1b**) = 21.6 min, 91.5:8.5 er. Absolute configuration was assigned to be (*S*) based on previous reports.<sup>10</sup>

<sup>1</sup>H NMR (600 MHz, CDCl<sub>3</sub>) δ 7.50 (d, *J* = 7.6 Hz, 1H), 7.31 (m, 4H), 7.27 – 7.21 (m, 2H), 7.19 (td, *J* = 7.4, 1.6 Hz, 1H), 7.13 (d, *J* = 7.3 Hz, 1H), 5.97 (s, 1H), 2.23 (s, 3H).

Racemic Standard:

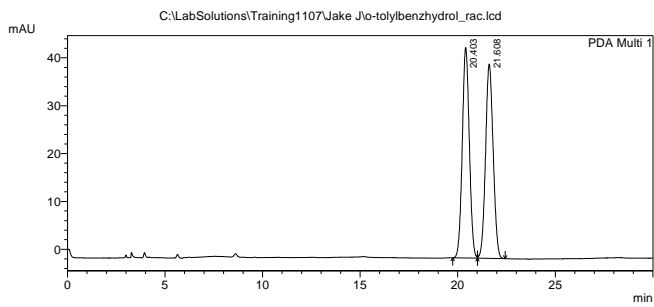

< Peak Table >

PeakTable C:\LabSolutions\Training1107\Jake Jfo-tolylbenzhydrol\_rac.lcd

| Peak# | Ret. Time | Area    | Height | Area %  | Height % |
|-------|-----------|---------|--------|---------|----------|
| 1     | 20.403    | 1104154 | 43993  | 50.043  | 51.995   |
| 2     | 21.608    | 1102272 | 40617  | 49.957  | 48.005   |
| Total |           | 2206427 | 84609  | 100.000 | 100.000  |

HPLC trace after Tamao-Fleming Oxidation of 5f:

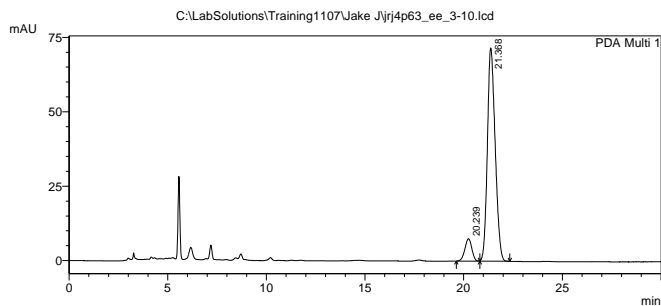

< Peak Table >

PeakTable C:\LabSolutions\Training1107\Jake Jjij4p63\_ee\_3-10.lcd

| Peak# | Ret. Time | Area    | Height | Area %  | Height % |
|-------|-----------|---------|--------|---------|----------|
| 1     | 20.239    | 183861  | 7514   | 8.569   | 9.489    |
| 2     | 21.368    | 1961798 | 71672  | 91.431  | 90.511   |
| Total |           | 2145659 | 79186  | 100.000 | 100.000  |

## VII. X-ray Crystallography Data

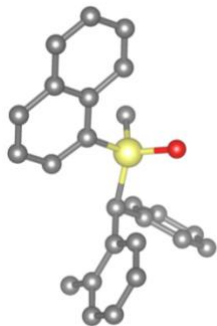

**Figure S15.** X-ray<sup>18</sup> of (+/-) **5i** hydrolysis product; H's are removed for clarity as well as the distorted enantiomer.

Crystals were grown from slow diffusion in DCM/Benzene. A colorless plate with approximate orthogonal dimensions 0.282 x 0.425 x 0.755mm<sup>3</sup> was placed and optically centered on the Bruker Duo<sup>19</sup> APEXII CCD system at -183°C(90K). Indexing of the unit cell used a random set of reflections collected from three series of 0.5° wide  $\omega$ -scans, 10 seconds per frame, and 30 frames per series that were well distributed in reciprocal space. Data were collected [MoK $\alpha$ ] with 0.3° wide scans, variable time per frame dependent upon detector  $2\theta$  angle and varying  $\phi$  and omega angles such that nearly all unique reflections were collected at least once. The crystal to detector distance was 5.00cm, thus providing a complete sphere of data to  $2\theta_{\max}=54.97^\circ$ .

### Structural determination and Refinement:

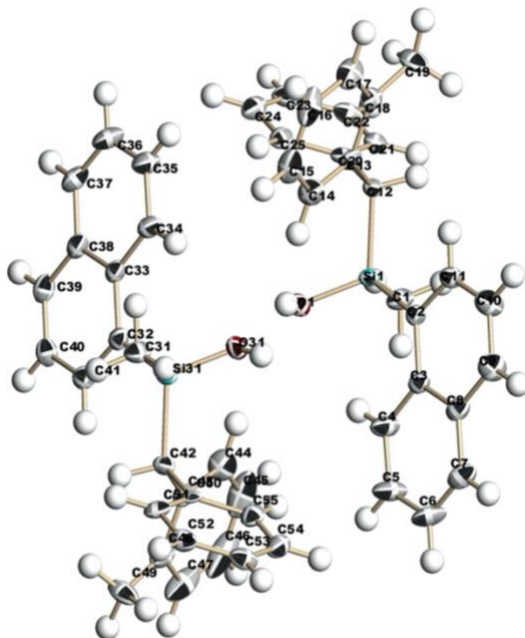

**Figure S16.** ORTEP of (+/-) **5i** hydrolysis product. Thermal Ellipsoids are at 50%.

All crystallographic calculations were performed on an Intel Xeon E5-1620v2 at 3.70GHz with eight core processor and 16GB of extended memory. Determination of the unit cell required Cellnow<sup>20</sup> and the reciprocal lattice viewing

(Rlatt) capabilities of the APEX2 program to determine the true lattice. Cellnow<sup>20</sup> determined the twin relationship between the two components, a rotation of 179.8° about the real axis 1 0 -1 produced the transformation matrix  $\begin{pmatrix} -0.344 & 0 & 0 \\ 0 & -0.650 & 0 \\ 0 & -1 & 0 \end{pmatrix}$  -1.356 0 0.344, generated the orientation matrices for the components and output a useable multiple matrices input file for the integration program SAINT<sup>19</sup>. Saint was run six times using the output optimized merged matrix file from the previous run. Data collected were now corrected for absorption using TWINABS<sup>21,22</sup> and Blessing's method and merged generating both single component HKLF4 and multi-component HKLF5 files. The SHELXTL<sup>23</sup> program package was now implemented to determine, based upon systematic absences and intensity statistics, the non-centrosymmetric monoclinic space group P2<sub>1</sub> (no. 4). The structure was determined by direct methods with a majority of the non-hydrogen atoms from the two nearly identical molecules being located directly using the program XT.<sup>24</sup> Refinement of the structure was achieved using the program XL.<sup>25</sup> One of the ortho-methyl-benzyl groups was found to be disordered over two positions in one of the molecules, while the other molecule was fully ordered. The OH groups were also found to be 50% disordered and optimized with one hydrogen directed towards the other molecules hydroxyl oxygen and the other away for each molecule. The data collected were merged for least squares refinement to 8983 unique data. All non-hydrogen atoms were refined anisotropically. Hydrogen atoms were idealized but their thermal parameters were allowed to refine freely but for those attached to the oxygen atoms; those were fixed to be equal to each other. The final structure was refined to convergence with R(F)=3.49%, wR(F<sup>2</sup>)=9.64%, GOF=1.043 for all 8893 unique reflections [R(F)=3.33, wR(F<sup>2</sup>)=9.49% for those 8671 data with Fo > 4σ(Fo)]. The final difference-Fourier map was featureless indicating that the structure is both correct and complete. The absolute configuration structure parameter, Flack(x),<sup>26</sup> was determined to be 0.06(7) indicating that the structure is correct.

Table S4. Crystal data and structure refinement for [C<sub>25</sub>H<sub>24</sub>OSi].

|                                   |                                                                             |                    |
|-----------------------------------|-----------------------------------------------------------------------------|--------------------|
| Identification code               | JF2862TW51 (JRJNpMeSi)                                                      |                    |
| Empirical formula                 | C <sub>25</sub> H <sub>24</sub> O Si                                        |                    |
| Formula weight                    | 368.53                                                                      |                    |
| Temperature                       | 90(2) K                                                                     |                    |
| Wavelength                        | 0.71073 Å                                                                   |                    |
| Crystal system                    | Monoclinic                                                                  |                    |
| Space group                       | P2 <sub>1</sub>                                                             |                    |
| Unit cell dimensions              | a = 7.9375(6) Å                                                             | ∠ = 90°.           |
|                                   | b = 20.4070(15) Å                                                           | ∠ = 104.2477(10)°. |
|                                   | c = 12.5011(9) Å                                                            | ∠ = 90°.           |
| Volume                            | 1962.6(3) Å <sup>3</sup>                                                    |                    |
| Z, Z'                             | 4, 2                                                                        |                    |
| Density (calculated)              | 1.247 Mg/m <sup>3</sup>                                                     |                    |
| Absorption coefficient            | 0.131 mm <sup>-1</sup>                                                      |                    |
| F(000)                            | 784                                                                         |                    |
| Crystal size                      | 0.755 x 0.425 x 0.282 mm <sup>3</sup>                                       |                    |
| Crystal color and habit           | Colorless Plate                                                             |                    |
| Diffractometer                    | Bruker APEX-II CCD                                                          |                    |
| Theta range for data collection   | 1.681 to 27.477°.                                                           |                    |
| Index ranges                      | -10 ≤ h ≤ 10, -26 ≤ k ≤ 26, -16 ≤ l ≤ 16                                    |                    |
| Reflections collected             | 8983                                                                        |                    |
| Independent reflections           | 8983                                                                        |                    |
| Observed reflections (I > 2σ(I))  | 8671                                                                        |                    |
| Completeness to theta = 25.242°   | 100.0 %                                                                     |                    |
| Absorption correction             | Semi-empirical from equivalents                                             |                    |
| Max. and min. transmission        | 0.9542 and 0.8639                                                           |                    |
| Solution method                   | SHELXT (Sheldrick, 2014)                                                    |                    |
| Refinement method                 | SHELXL-2018/3 (Sheldrick, 2018) Full-matrix least-squares on F <sup>2</sup> |                    |
| Data / restraints / parameters    | 8983 / 8 / 588                                                              |                    |
| Goodness-of-fit on F <sup>2</sup> | 1.043                                                                       |                    |
| Final R indices [I > 2σ(I)]       | R1 = 0.0333, wR2 = 0.0949                                                   |                    |
| R indices (all data)              | R1 = 0.0349, wR2 = 0.0964                                                   |                    |
| Absolute structure parameter      | 0.06(7)                                                                     |                    |
| Largest diff. peak and hole       | 0.231 and -0.204 e.Å <sup>-3</sup>                                          |                    |



## VIII. References

- (1) Green, S. P.; Wheelhouse, K. M.; Payne, A. D.; Hallett, J. P.; Miller, P. W.; Bull, J. A. Thermal Stability and Explosive Hazard Assessment of Diazo Compounds and Diazo Transfer Reagents. *Org. Process Res. Dev.* **2020**, *24* (1), 67–84. <https://doi.org/10.1021/acs.oprd.9b00422>.
- (2) Yasutomi, Y.; Suematsu, H.; Katsuki, T. Iridium(III)-Catalyzed Enantioselective Si–H Bond Insertion and Formation of an Enantioenriched Silicon Center. *J. Am. Chem. Soc.* **2010**, *132* (13), 4510–4511. <https://doi.org/10.1021/ja100833h>.
- (3) Satoh, Y.; Igarashi, M.; Sato, K.; Shimada, S. Highly Selective Synthesis of Hydrosiloxanes by Au-Catalyzed Dehydrogenative Cross-Coupling Reaction of Silanols with Hydrosilanes. *ACS Catal.* **2017**, *7* (3), 1836–1840. <https://doi.org/10.1021/acscatal.6b03560>.
- (4) Lamb, K. N.; Squitieri, R. A.; Chintala, S. R.; Kwong, A. J.; Balmond, E. I.; Soldi, C.; Dmitrenko, O.; Castiñeira Reis, M.; Chung, R.; Addison, J. B.; Fettinger, J. C.; Hein, J. E.; Tantillo, D. J.; Fox, J. M.; Shaw, J. T. Synthesis of Benzodihydrofurans by Asymmetric C–H Insertion Reactions of Donor/Donor Rhodium Carbenes. *Chem. – A Eur. J.* **2017**, *23* (49), 11843–11855. <https://doi.org/10.1002/chem.201701630>.
- (5) Chen, J.; Chen, C.; Ji, C.; Lu, Z. Cobalt-Catalyzed Asymmetric Hydrogenation of 1,1-Diarylethenes. *Org. Lett.* **2016**, *18* (7), 1594–1597. <https://doi.org/10.1021/acs.orglett.6b00453>.
- (6) Brown, E.; Chevalier, C.; Huet, F.; Le Grumelec, C.; Lézé, A.; Touet, J. Determination of the Enantiomeric Excesses of Chiral Acids by <sup>19</sup>F NMR Studies of Their Esters Deriving from (R)-(+)-2-(Trifluoromethyl)Benzhydrol. *Tetrahedron: Asymmetry* **1994**, *5* (7), 1191–1194. [https://doi.org/https://doi.org/10.1016/0957-4166\(94\)80154-1](https://doi.org/https://doi.org/10.1016/0957-4166(94)80154-1).
- (7) Wu, C.; Hu, F.; Liu, Z.; Deng, G.; Ye, F.; Zhang, Y.; Wang, J. Cu(I)-Catalyzed Coupling of Diaryldiazomethanes with Terminal Alkynes: An Efficient Synthesis of Tri-Aryl-Substituted Allenes. *Tetrahedron*. 2015, pp 9196–9201. <https://doi.org/10.1016/j.tet.2015.10.043>.
- (8) Cobo, A. A.; Armstrong, B. M.; Fettinger, J. C.; Franz, A. K. Catalytic Asymmetric Synthesis of Cyclopentene-Spirooxindoles Bearing Vinylsilanes Capable of Further Transformations. *Org. Lett.* **2019**, *21* (20), 8196–8200. <https://doi.org/10.1021/acs.orglett.9b02852>.
- (9) Karmel, C.; Chen, Z.; Hartwig, J. F. Iridium-Catalyzed Silylation of C–H Bonds in Unactivated Arenes: A Sterically Encumbered Phenanthroline Ligand Accelerates Catalysis. *J. Am. Chem. Soc.* **2019**, *141* (17), 7063–7072. <https://doi.org/10.1021/jacs.9b01972>.
- (10) Touge, T.; Nara, H.; Fujiwhara, M.; Kayaki, Y.; Ikariya, T. Efficient Access to Chiral Benzhydrols via Asymmetric Transfer Hydrogenation of Unsymmetrical Benzophenones with Bifunctional Oxo-Tethered Ruthenium Catalysts. *J. Am. Chem. Soc.* **2016**, *138* (32), 10084–10087. <https://doi.org/10.1021/jacs.6b05738>.
- (11) Corriu, R. J. P.; Guérin, C.; Moreau, J. J. E. Stereochemistry at Silicon. *Topics in Stereochemistry*. January 1, 1984, pp 43–198. <https://doi.org/doi:10.1002/9780470147245.ch2>.
- (12) Oestreich, M. Chirality Transfer from Silicon to Carbon. *Chem. – A Eur. J.* **2006**, *12* (1), 30–37. <https://doi.org/10.1002/chem.200500782>.
- (13) Zhang, J.; Park, S.; Chang, S. Catalytic Access to Bridged Sila-N-Heterocycles from Piperidines via Cascade Sp<sup>3</sup> and Sp<sup>2</sup> C–Si Bond Formation. *J. Am. Chem. Soc.* **2018**, *140* (41), 13209–13213. <https://doi.org/10.1021/jacs.8b08733>.
- (14) Koga, S.; Ueki, S.; Shimada, M.; Ishii, R.; Kurihara, Y.; Yamanoi, Y.; Yuasa, J.; Kawai, T.; Uchida, T. A.; Iwamura, M.; Nozaki, K.; Nishihara, H. Access to Chiral Silicon Centers for Application to Circularly Polarized Luminescence Materials. *J. Org. Chem.* **2017**, *82* (12), 6108–6117. <https://doi.org/10.1021/acs.joc.7b00583>.
- (15) Yasutomi, Y.; Suematsu, H.; Katsuki, T. Iridium(III)-Catalyzed Enantioselective Si–H Bond Insertion and Formation of an Enantioenriched Silicon Center. *J. Am. Chem. Soc.* **2010**, *132* (13), 4510–4511. <https://doi.org/10.1021/ja100833h>.
- (16) Lee, M.; Ren, Z.; Musaev, D. G.; Davies, H. M. L. Rhodium-Stabilized Diarylcarbenes Behaving as Donor/Acceptor Carbenes. *ACS Catal.* **2020**, 6240–6247. <https://doi.org/10.1021/acscatal.0c01131>.

- (17) Lasri, J.; Aly, M. M.; Eltayeb, N. E.; Babgi, B. A. Synthesis of Symmetrical and Asymmetrical Azines from Hydrazones and/or Ferrocenecarboxaldehyde as Potential Antimicrobial–Antitumor Agents. *J. Mol. Struct.* **2018**, *1164*, 1–8.  
<https://doi.org/https://doi.org/10.1016/j.molstruc.2018.03.030>.
- (18) Momma, K.; Izumi, F. *{\it VESTA3}* for Three-Dimensional Visualization of Crystal, Volumetric and Morphology Data. *J. Appl. Crystallogr.* **2011**, *44* (6), 1272–1276.  
<https://doi.org/10.1107/S0021889811038970>.
- (19) Bruker (2013) APEXII (Version 2014.9-1) and (2016) SAINT (Version 8.37a). Bruker AXS Inc., Madison, Wisconsin, USA.
- (20) Sheldrick, G.M., CELLNOW, Twin matrix determination program, Universität Göttingen: Göttingen, Germany, Version 2008/3.
- (21) An Empirical Correction for Absorption Anisotropy, Blessing, R. H. (1995). *Acta Cryst.*, *A51*, 33–38.
- (22) Sheldrick, G.M., TWINABS Version 2012/1 ‘An Empirical Correction for Absorption Anisotropy applied to Twinned crystals’. Universität Göttingen: Göttingen, Germany.
- (23) Sheldrick, G.M., (2002). SHELXTL. Version 6.1. Siemens Analytical X-ray Instruments Inc., Madison, Wisconsin, USA.
- (24) Sheldrick, G. M., (2014). SHELXT. Universität Göttingen: Göttingen, Germany.
- (25) Sheldrick, G. M., SHELXL2017/3 structure refined program - unpublished.
- (26) On Enantiomorph-Polarity Estimation, Flack, H.D. (1983). *Acta Cryst.*, *A39*, 876–881.

# IX. Copies of NMR Spectra

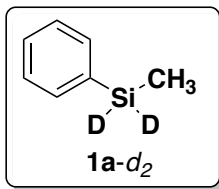

<sup>1</sup>H, 600 MHz, CDCl<sub>3</sub>

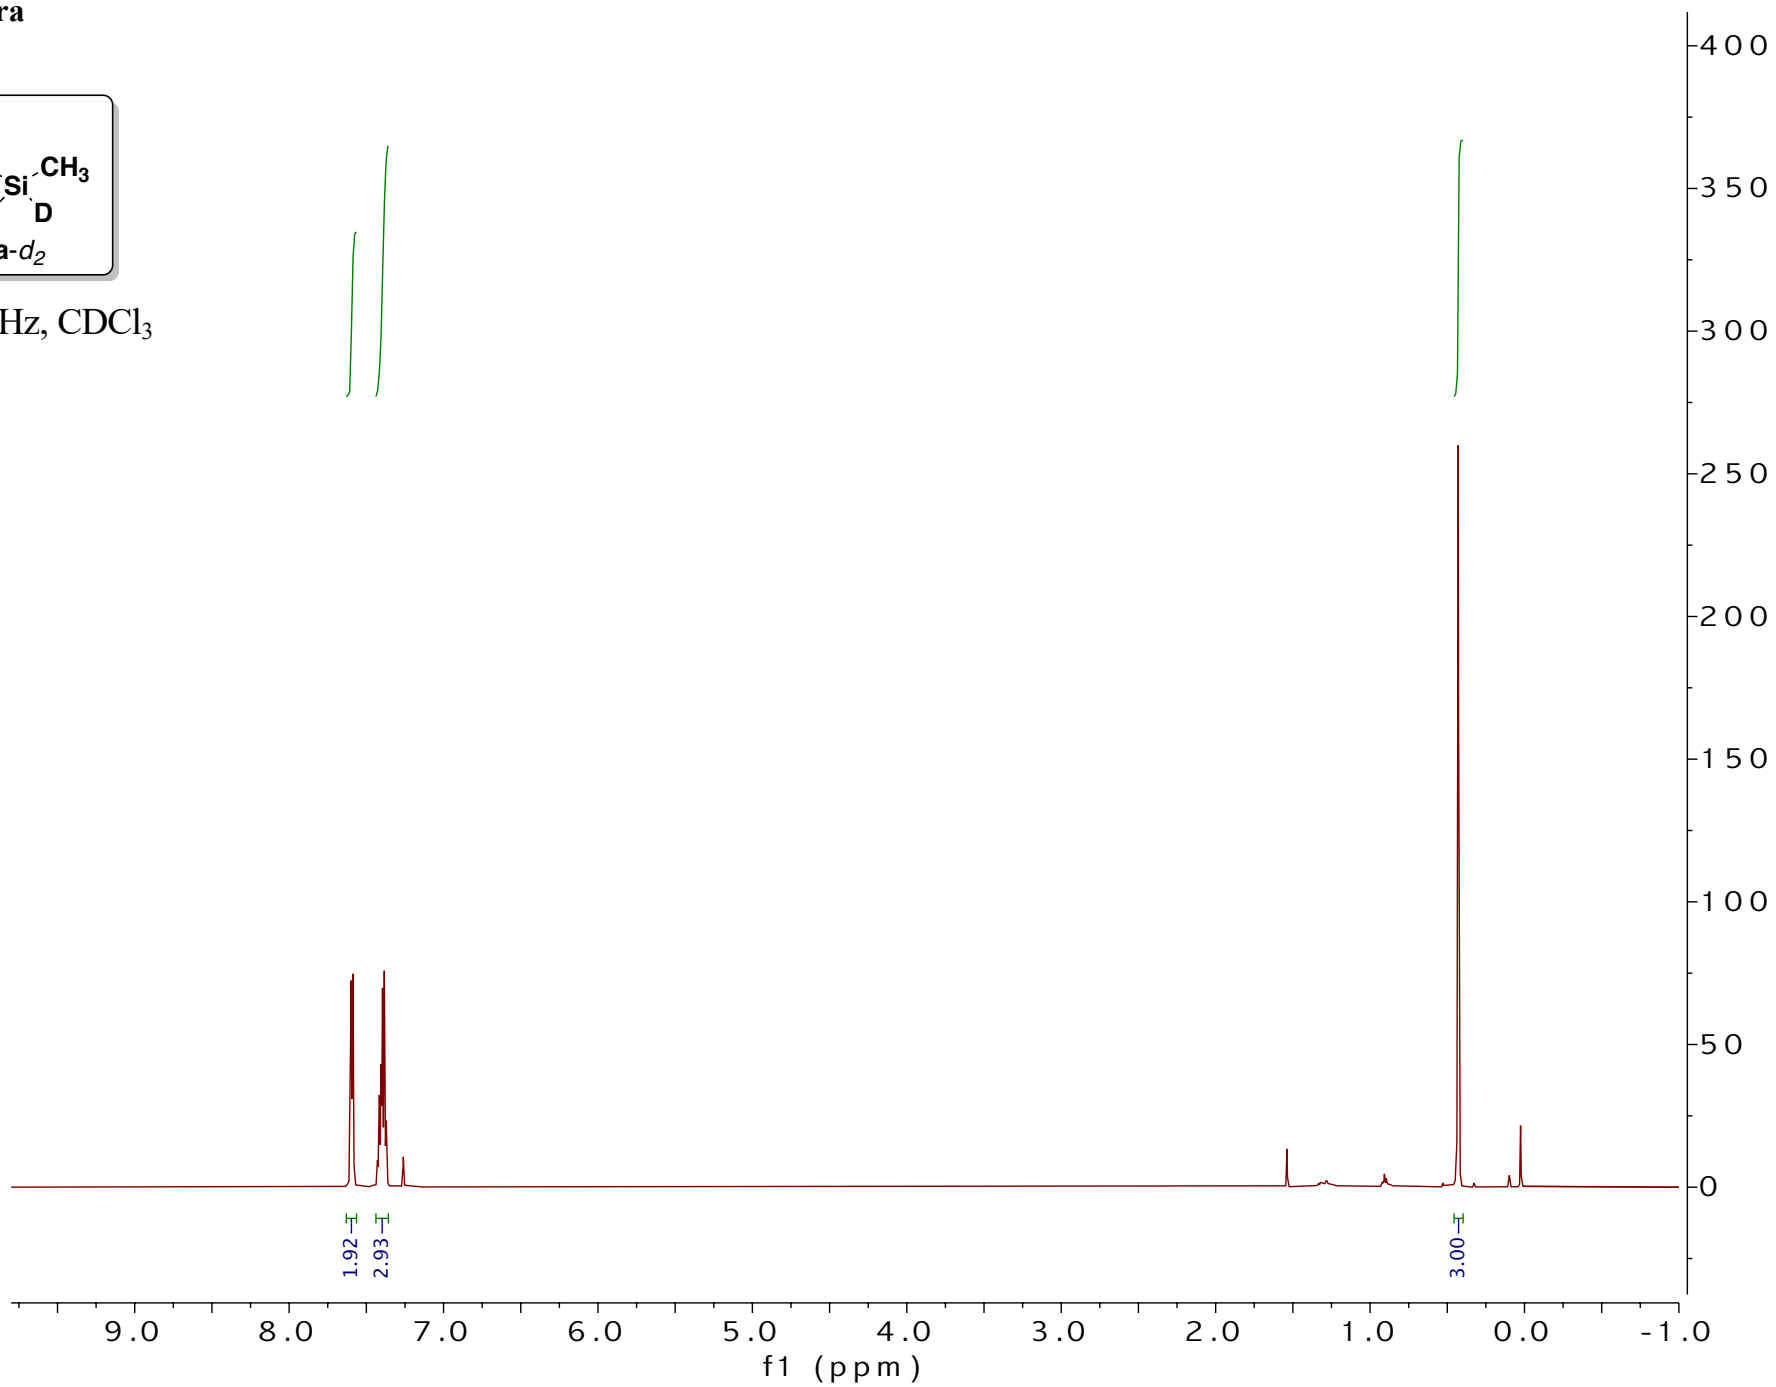

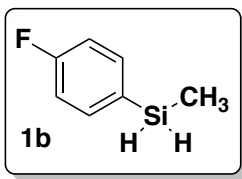

$^1\text{H}$ , 600 MHz,  $\text{C}_6\text{D}_6$

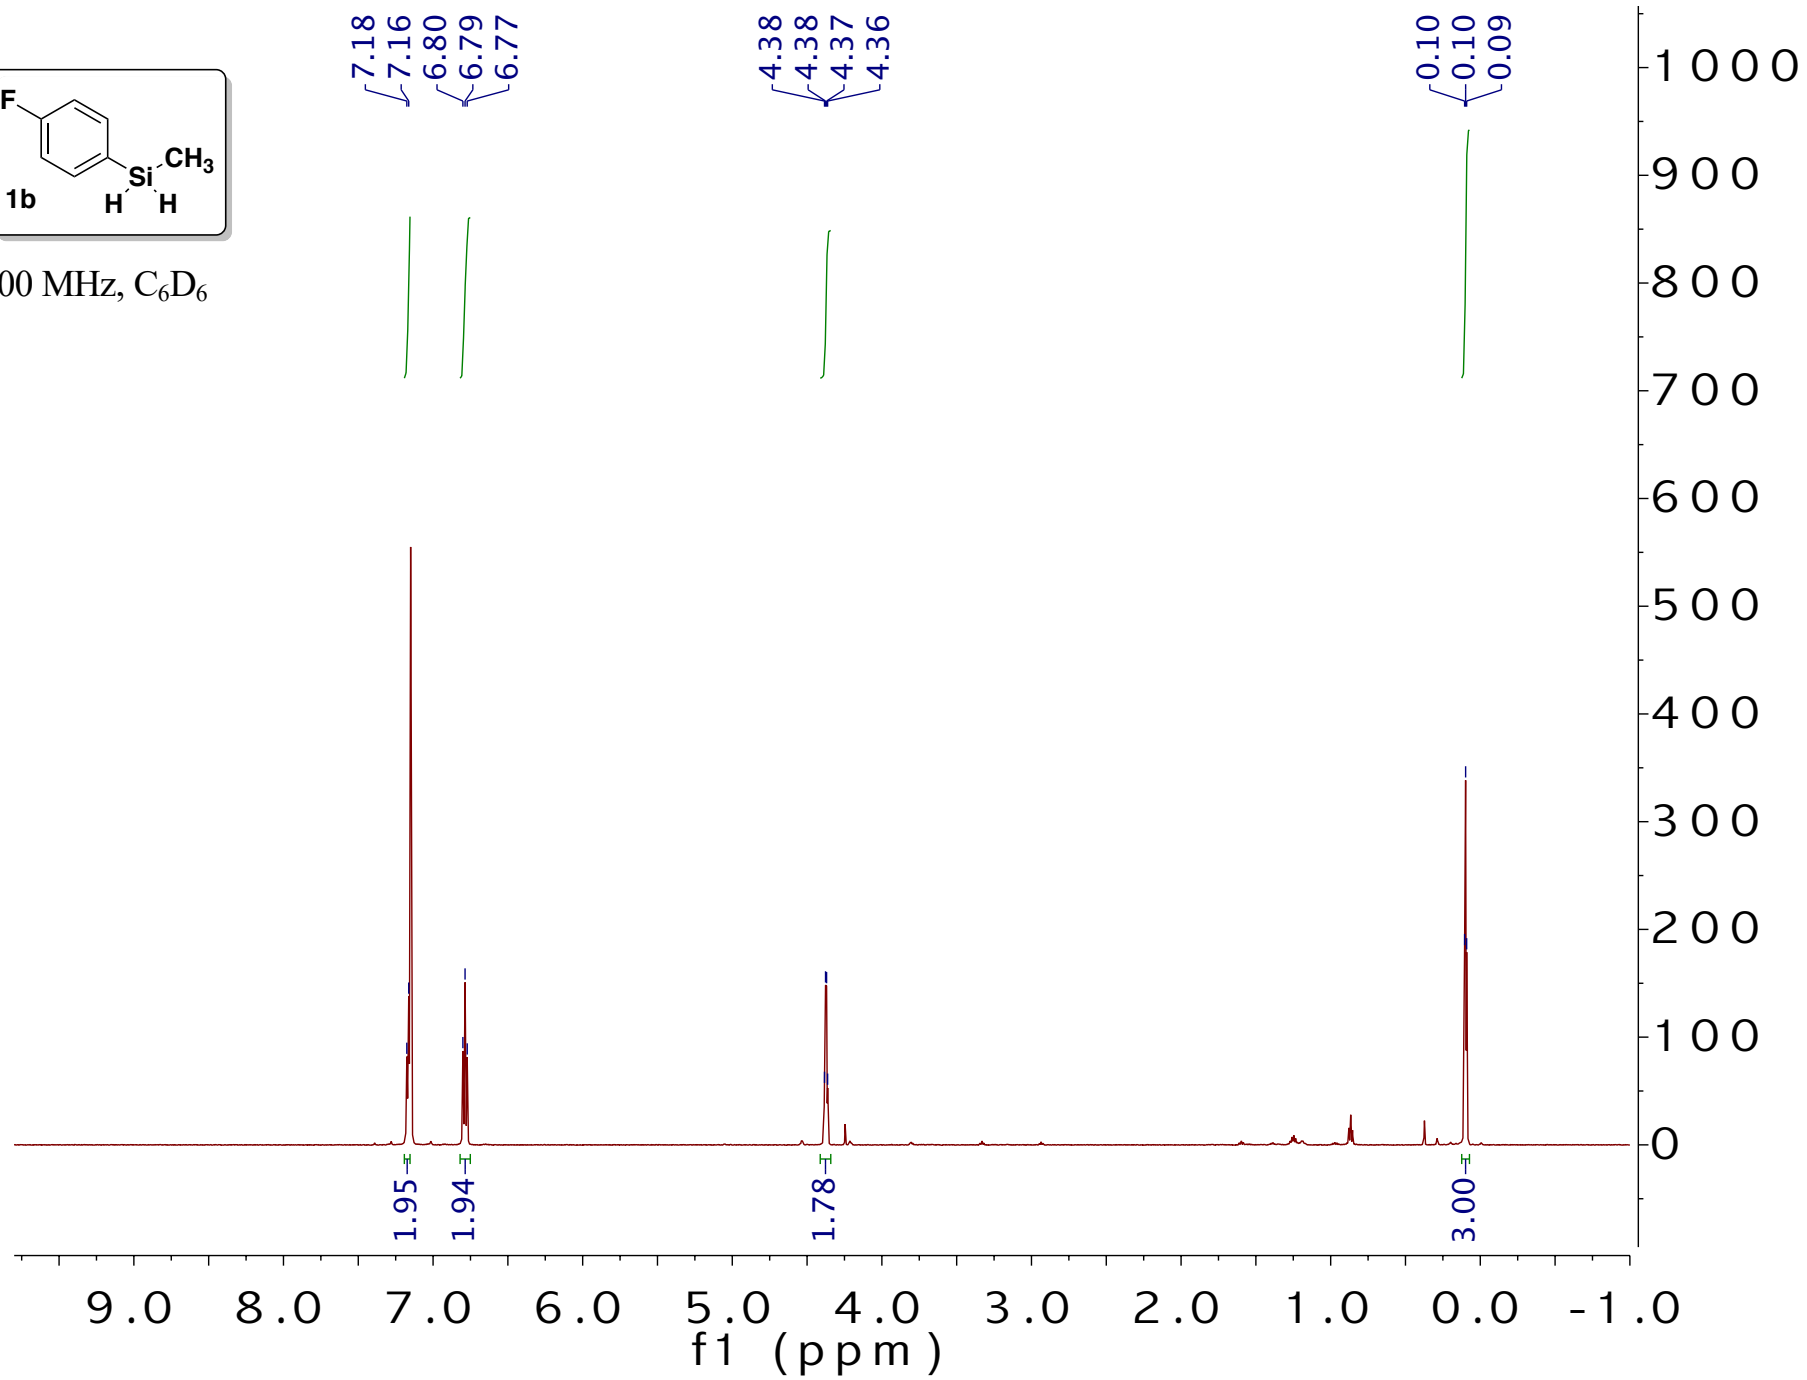

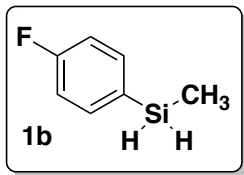

$^{13}\text{C}$ , 100 MHz,  $\text{CDCl}_3$

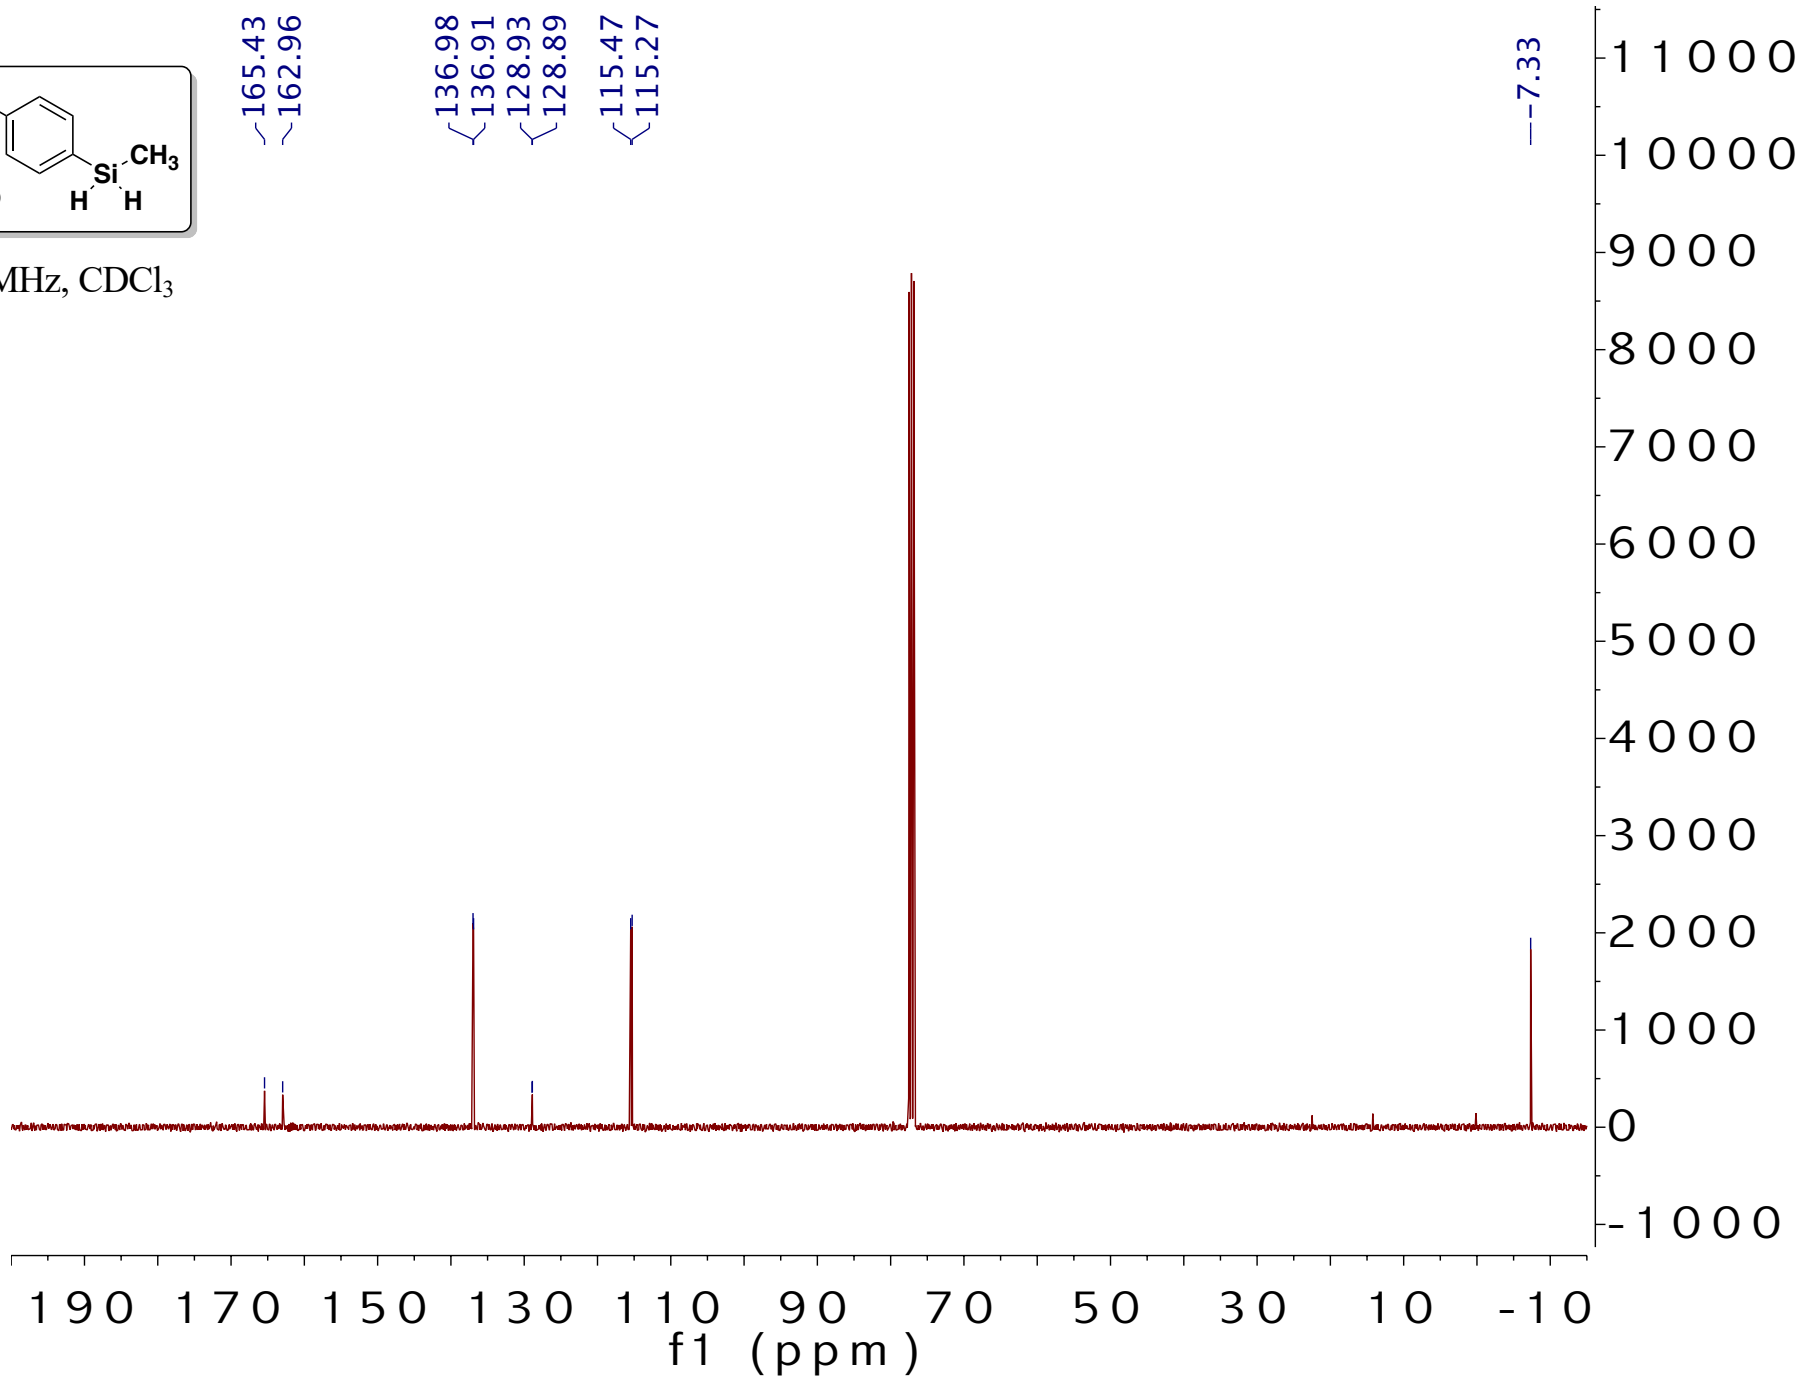

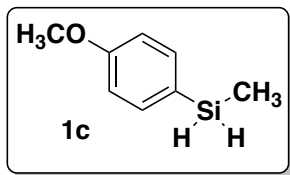

$^1\text{H}$ , 600 MHz,  $\text{C}_6\text{D}_6$

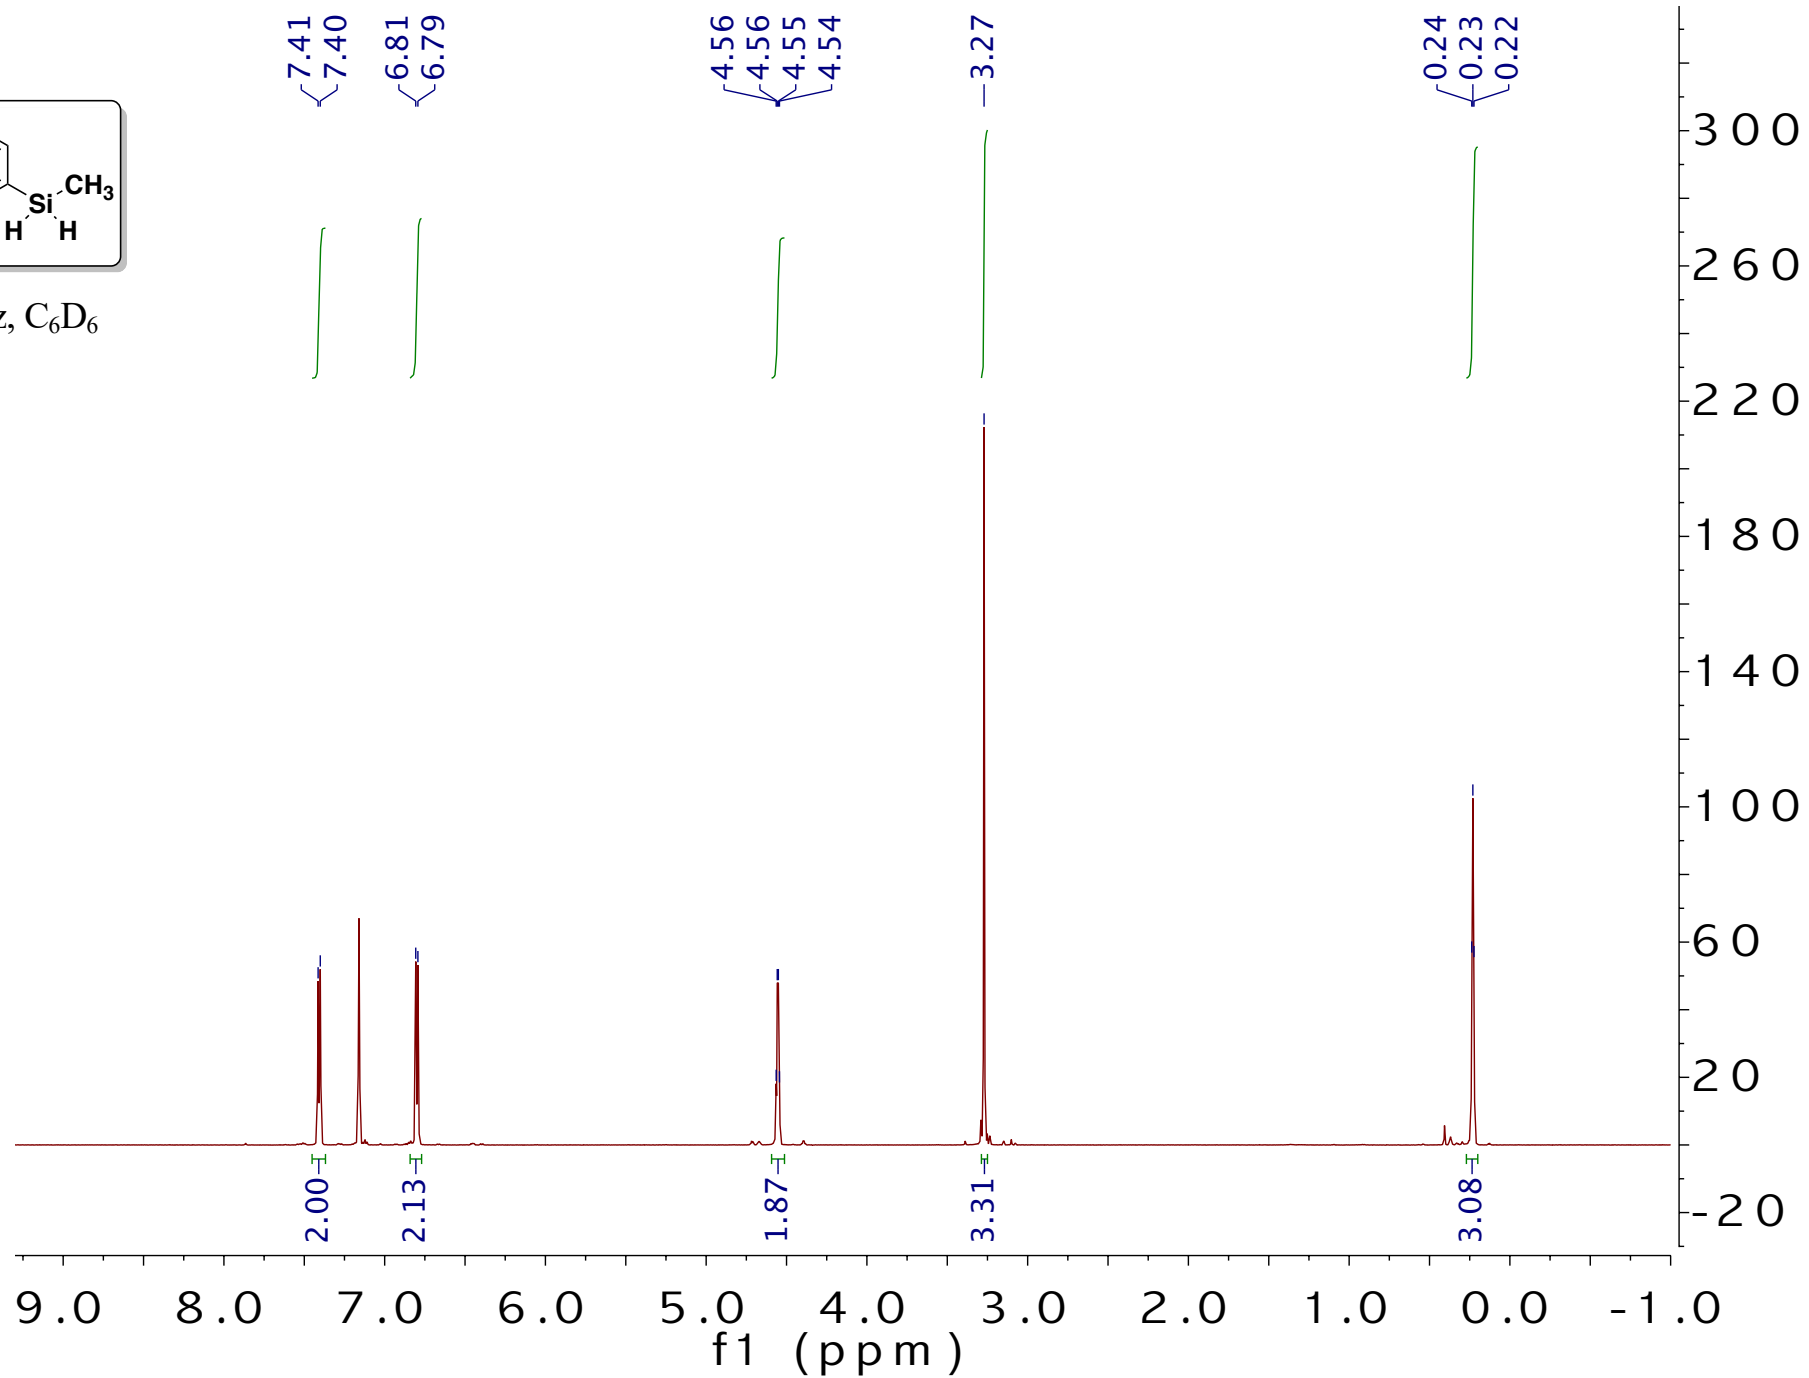

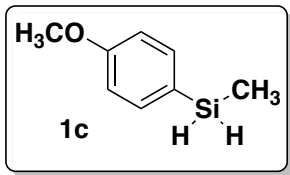

$^{13}\text{C}$ , 100 MHz,  $\text{CDCl}_3$

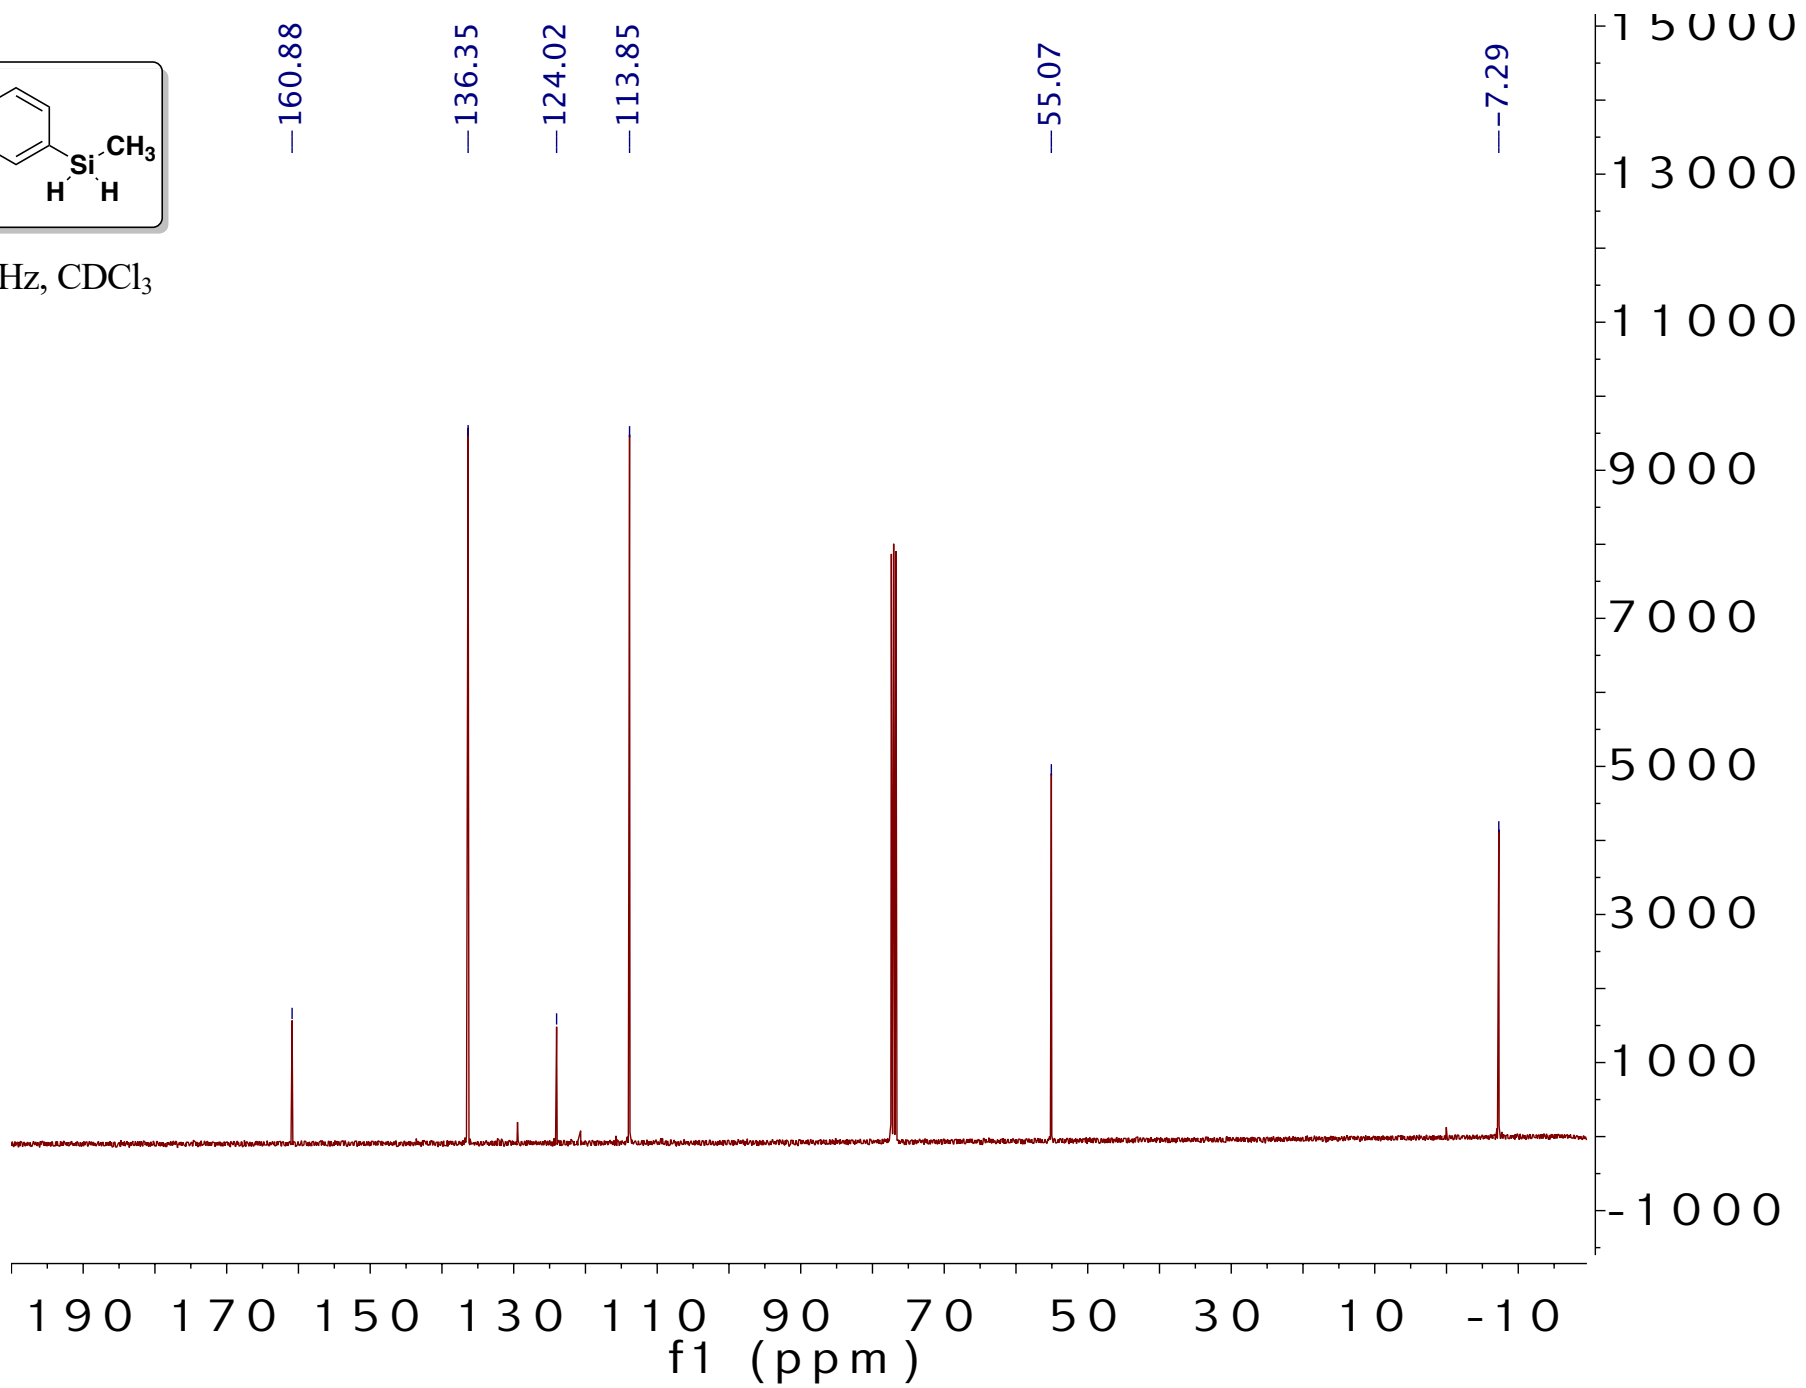

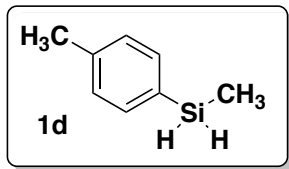

$^1\text{H}$ , 600 MHz,  $\text{C}_6\text{D}_6$

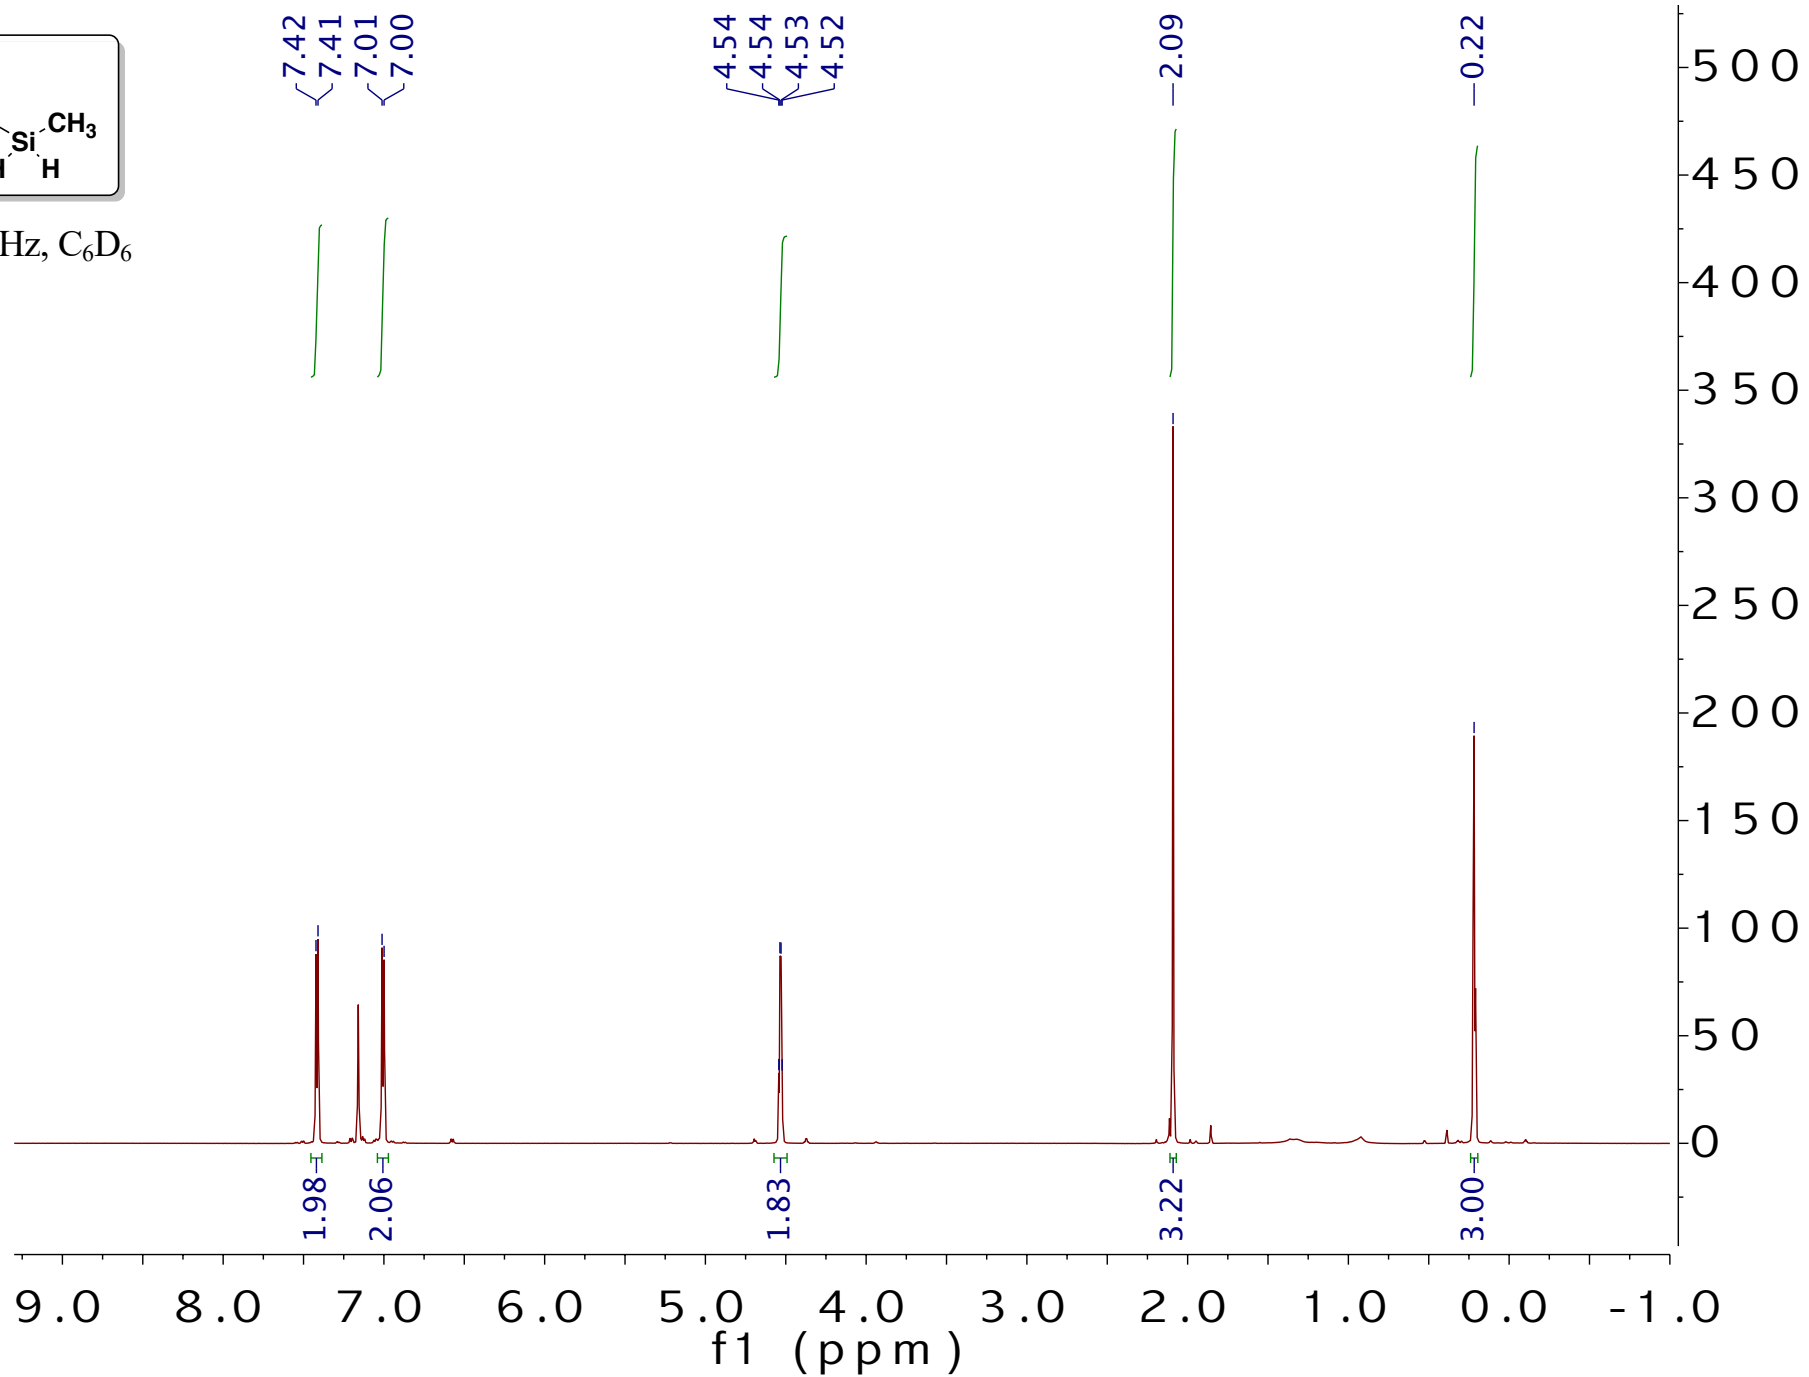



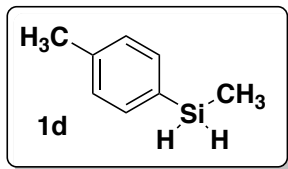

$^{13}\text{C}$ , 100 MHz,  $\text{CDCl}_3$

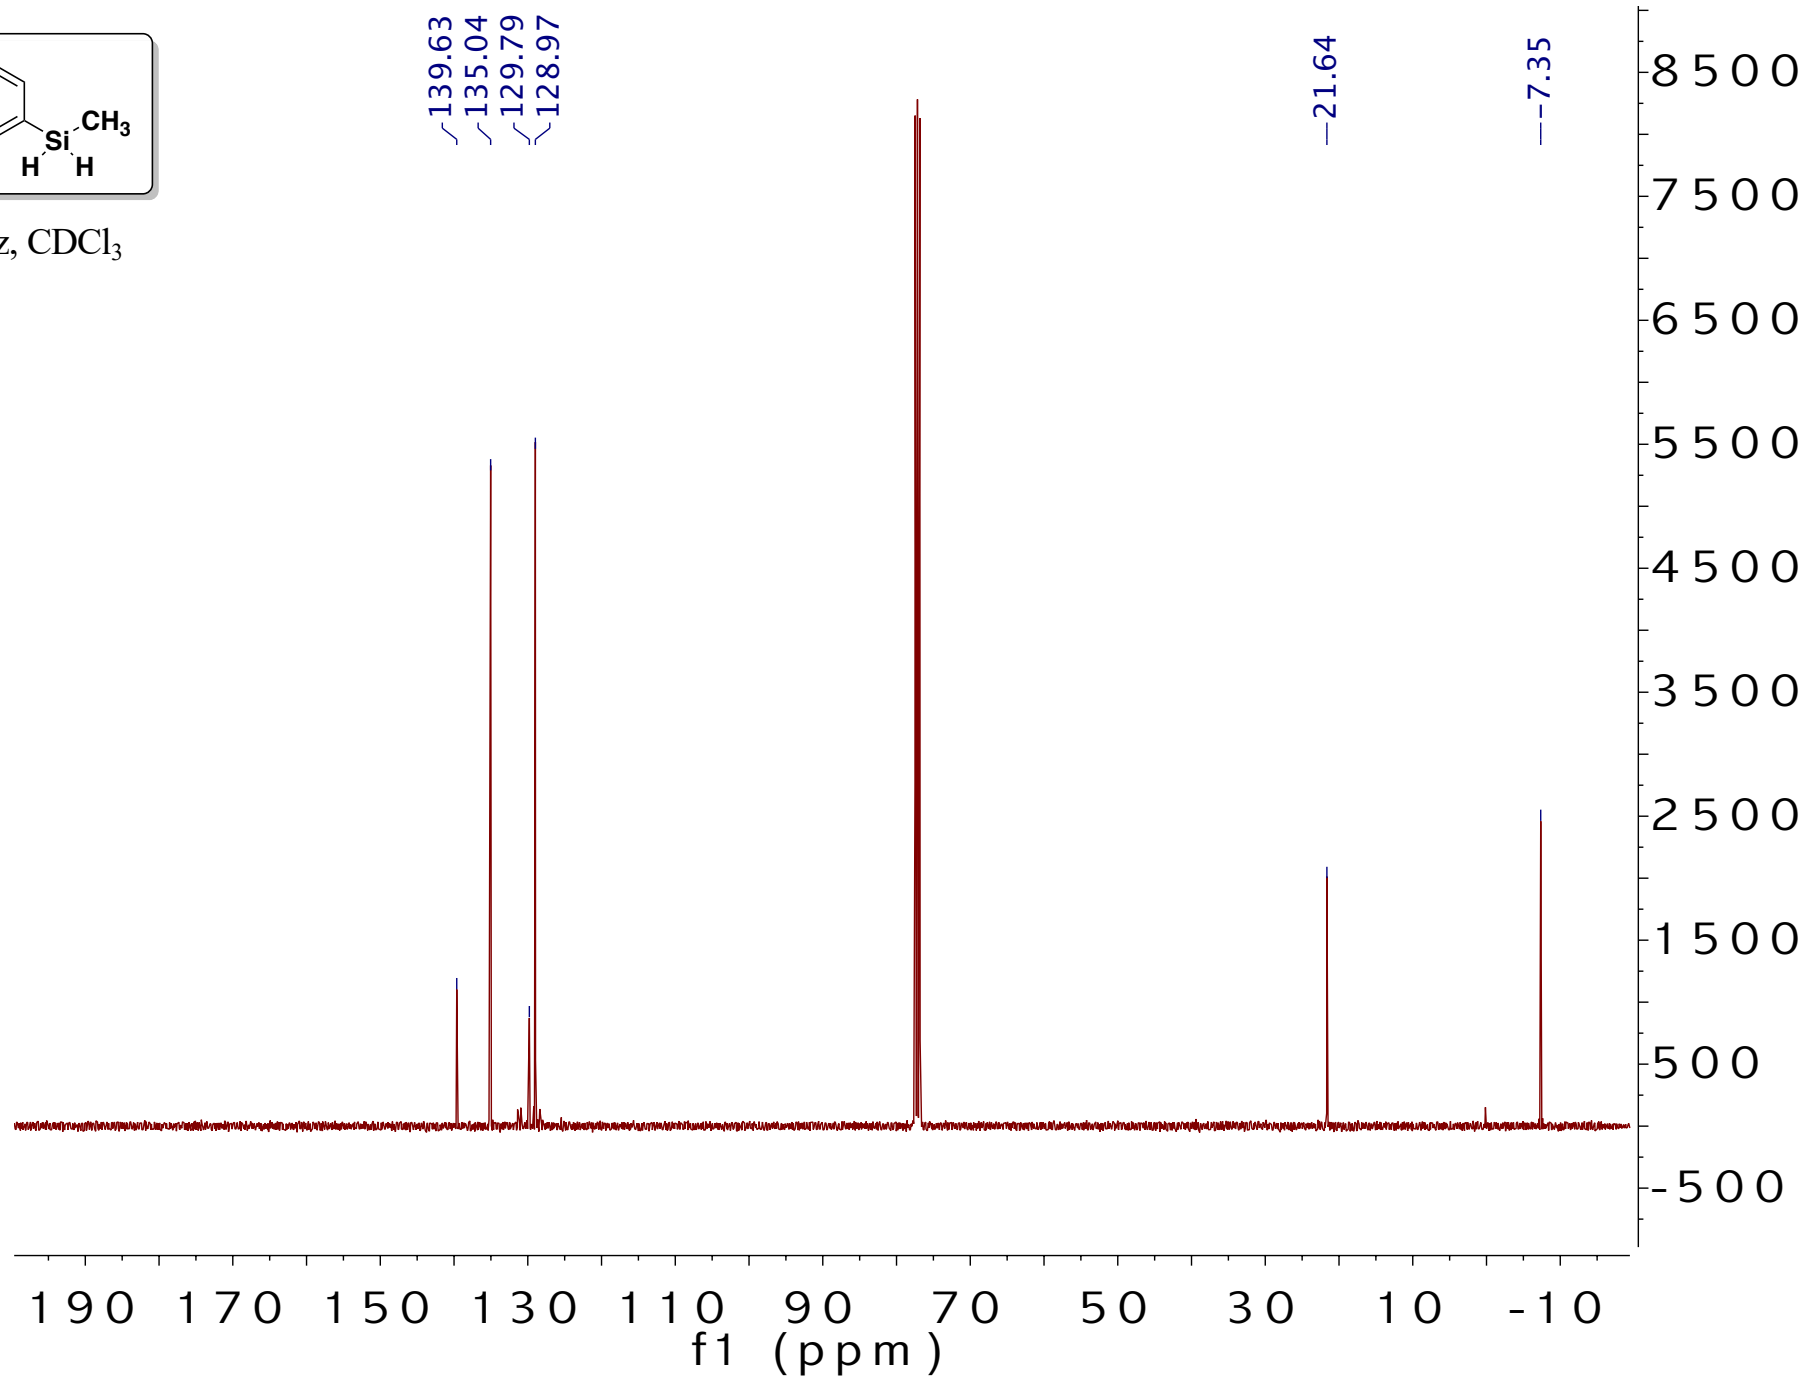

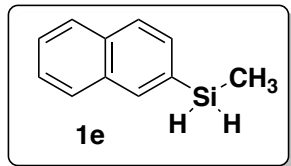

$^1\text{H}$ , 600 MHz,  $\text{C}_6\text{D}_6$

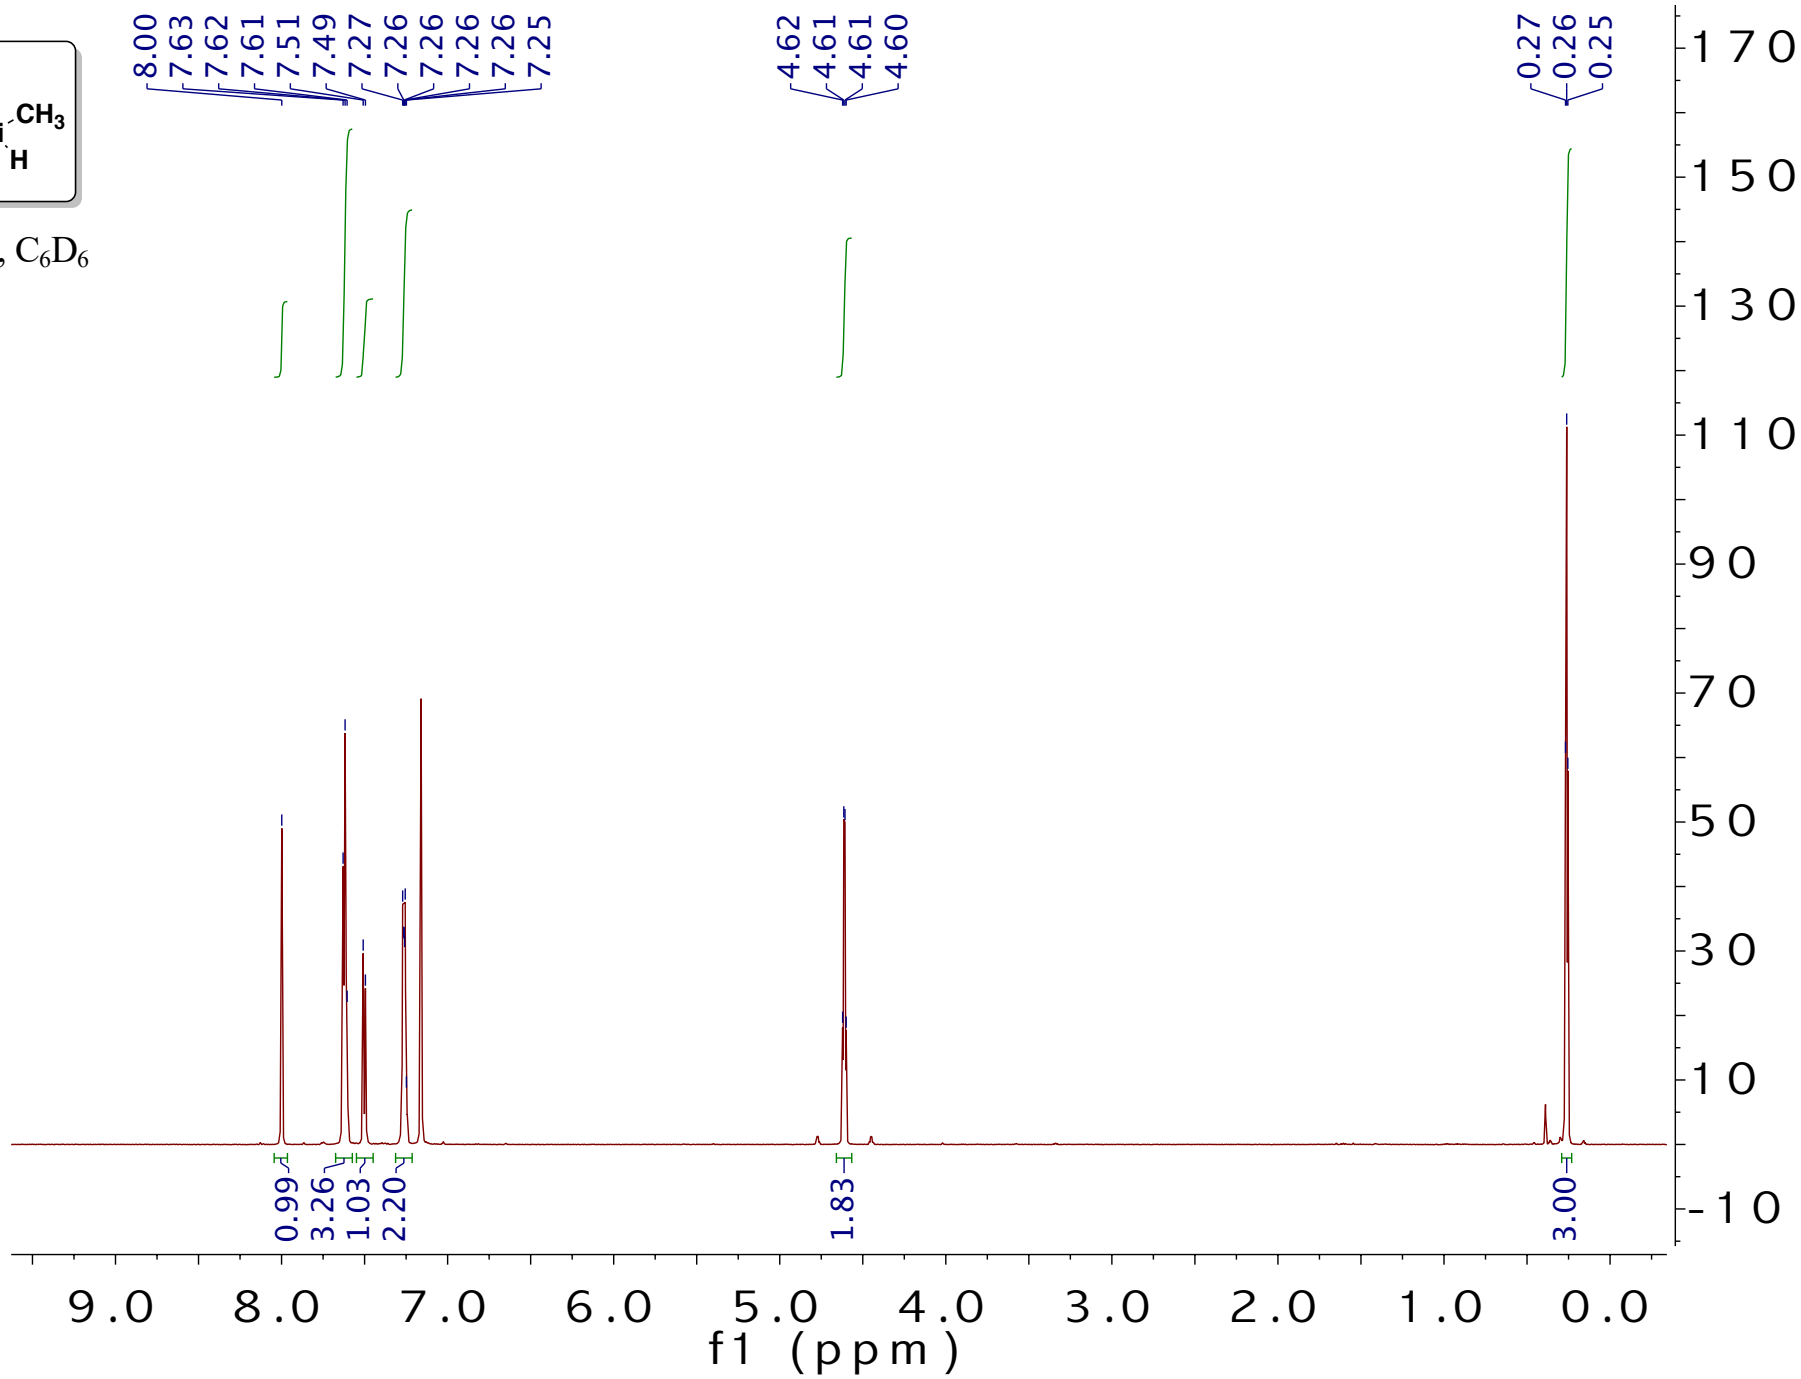

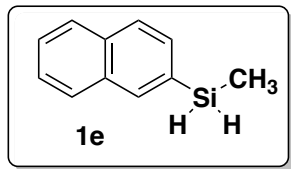

$^{13}\text{C}$ , 100 MHz,  $\text{CDCl}_3$

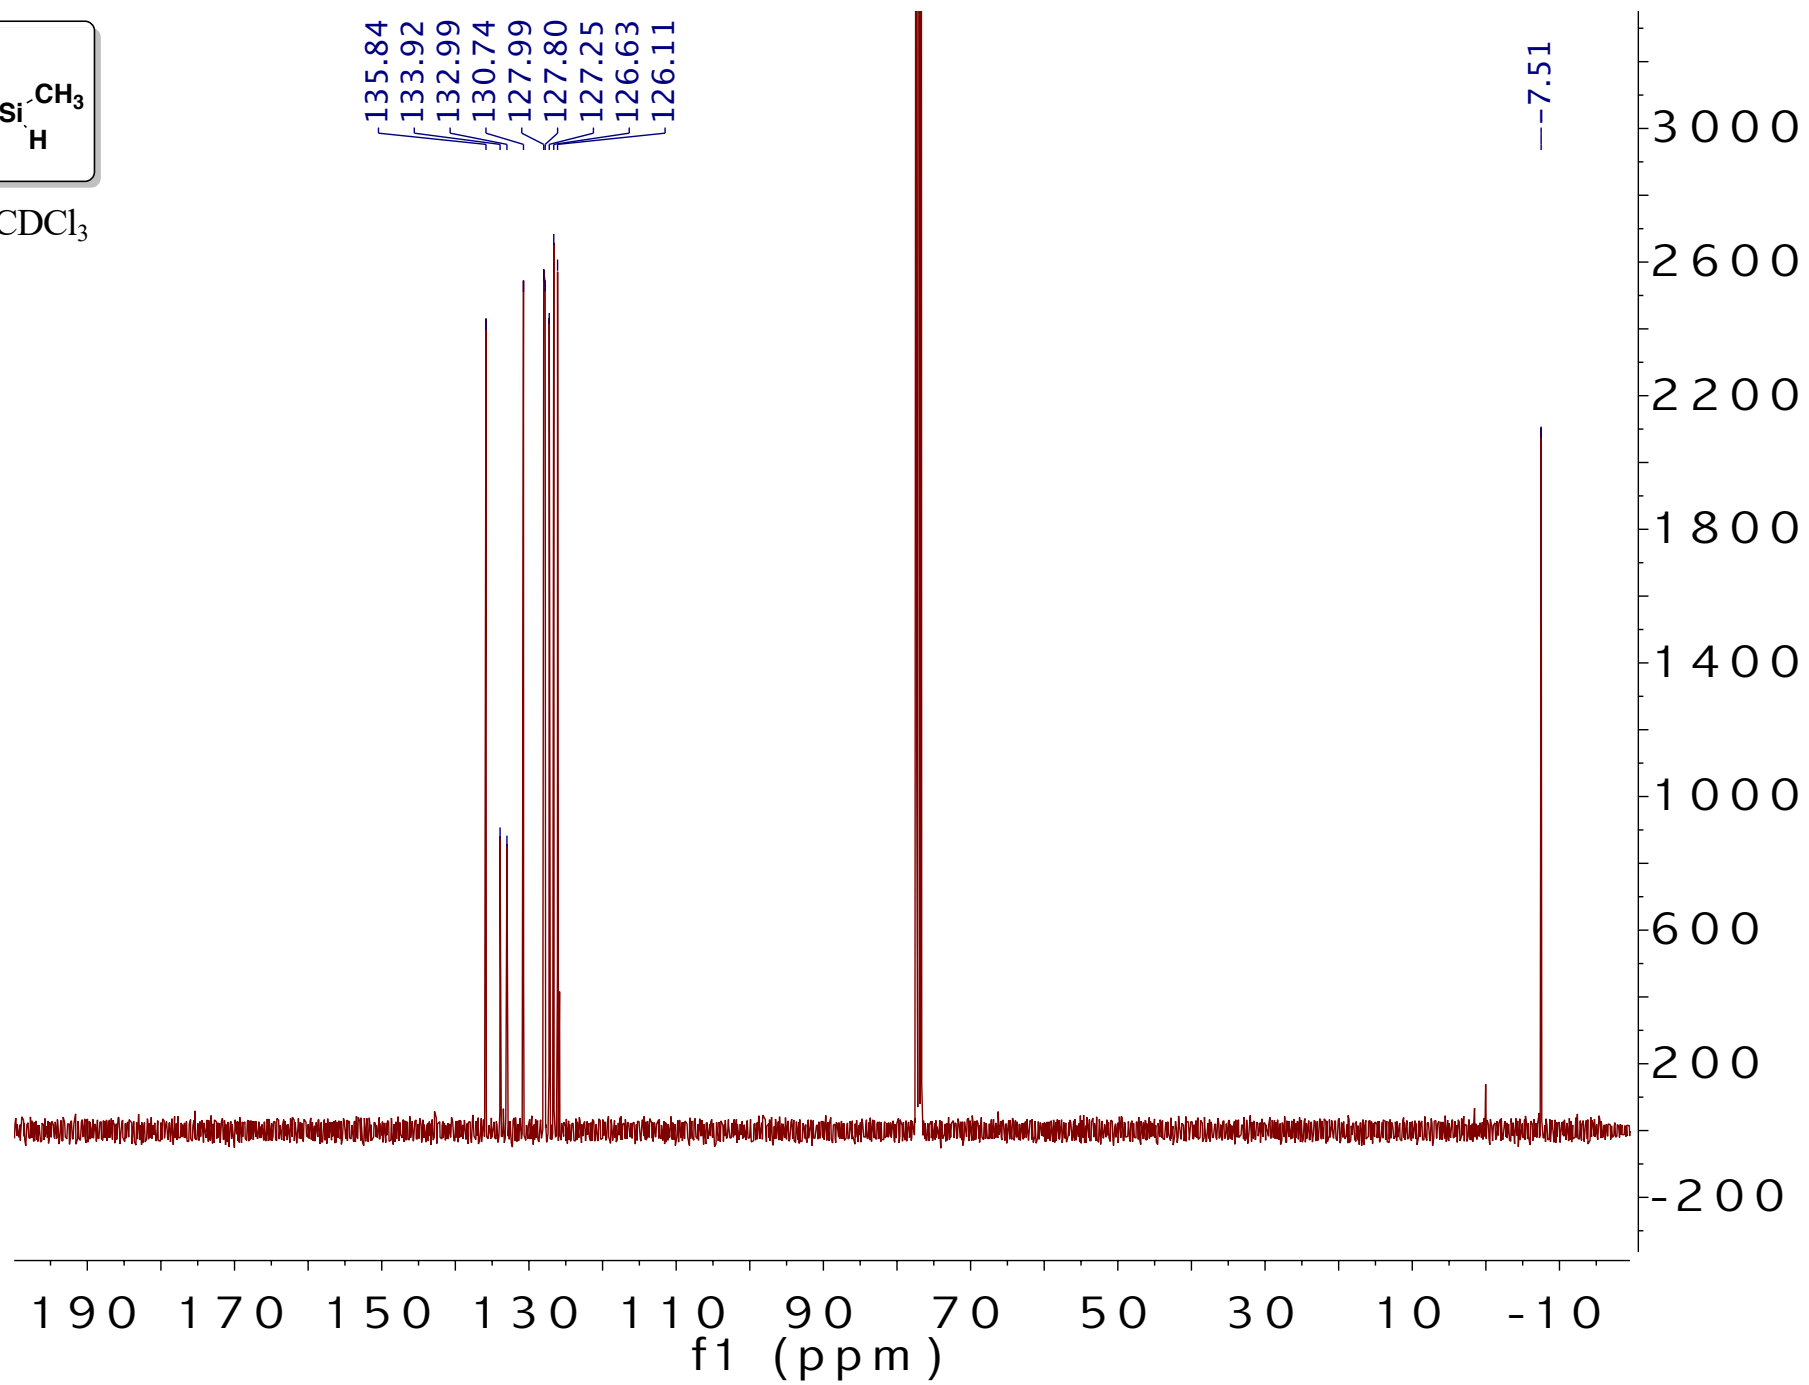

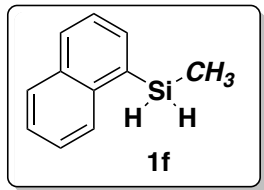

$^1\text{H}$ , 600 MHz,  $\text{CDCl}_3$

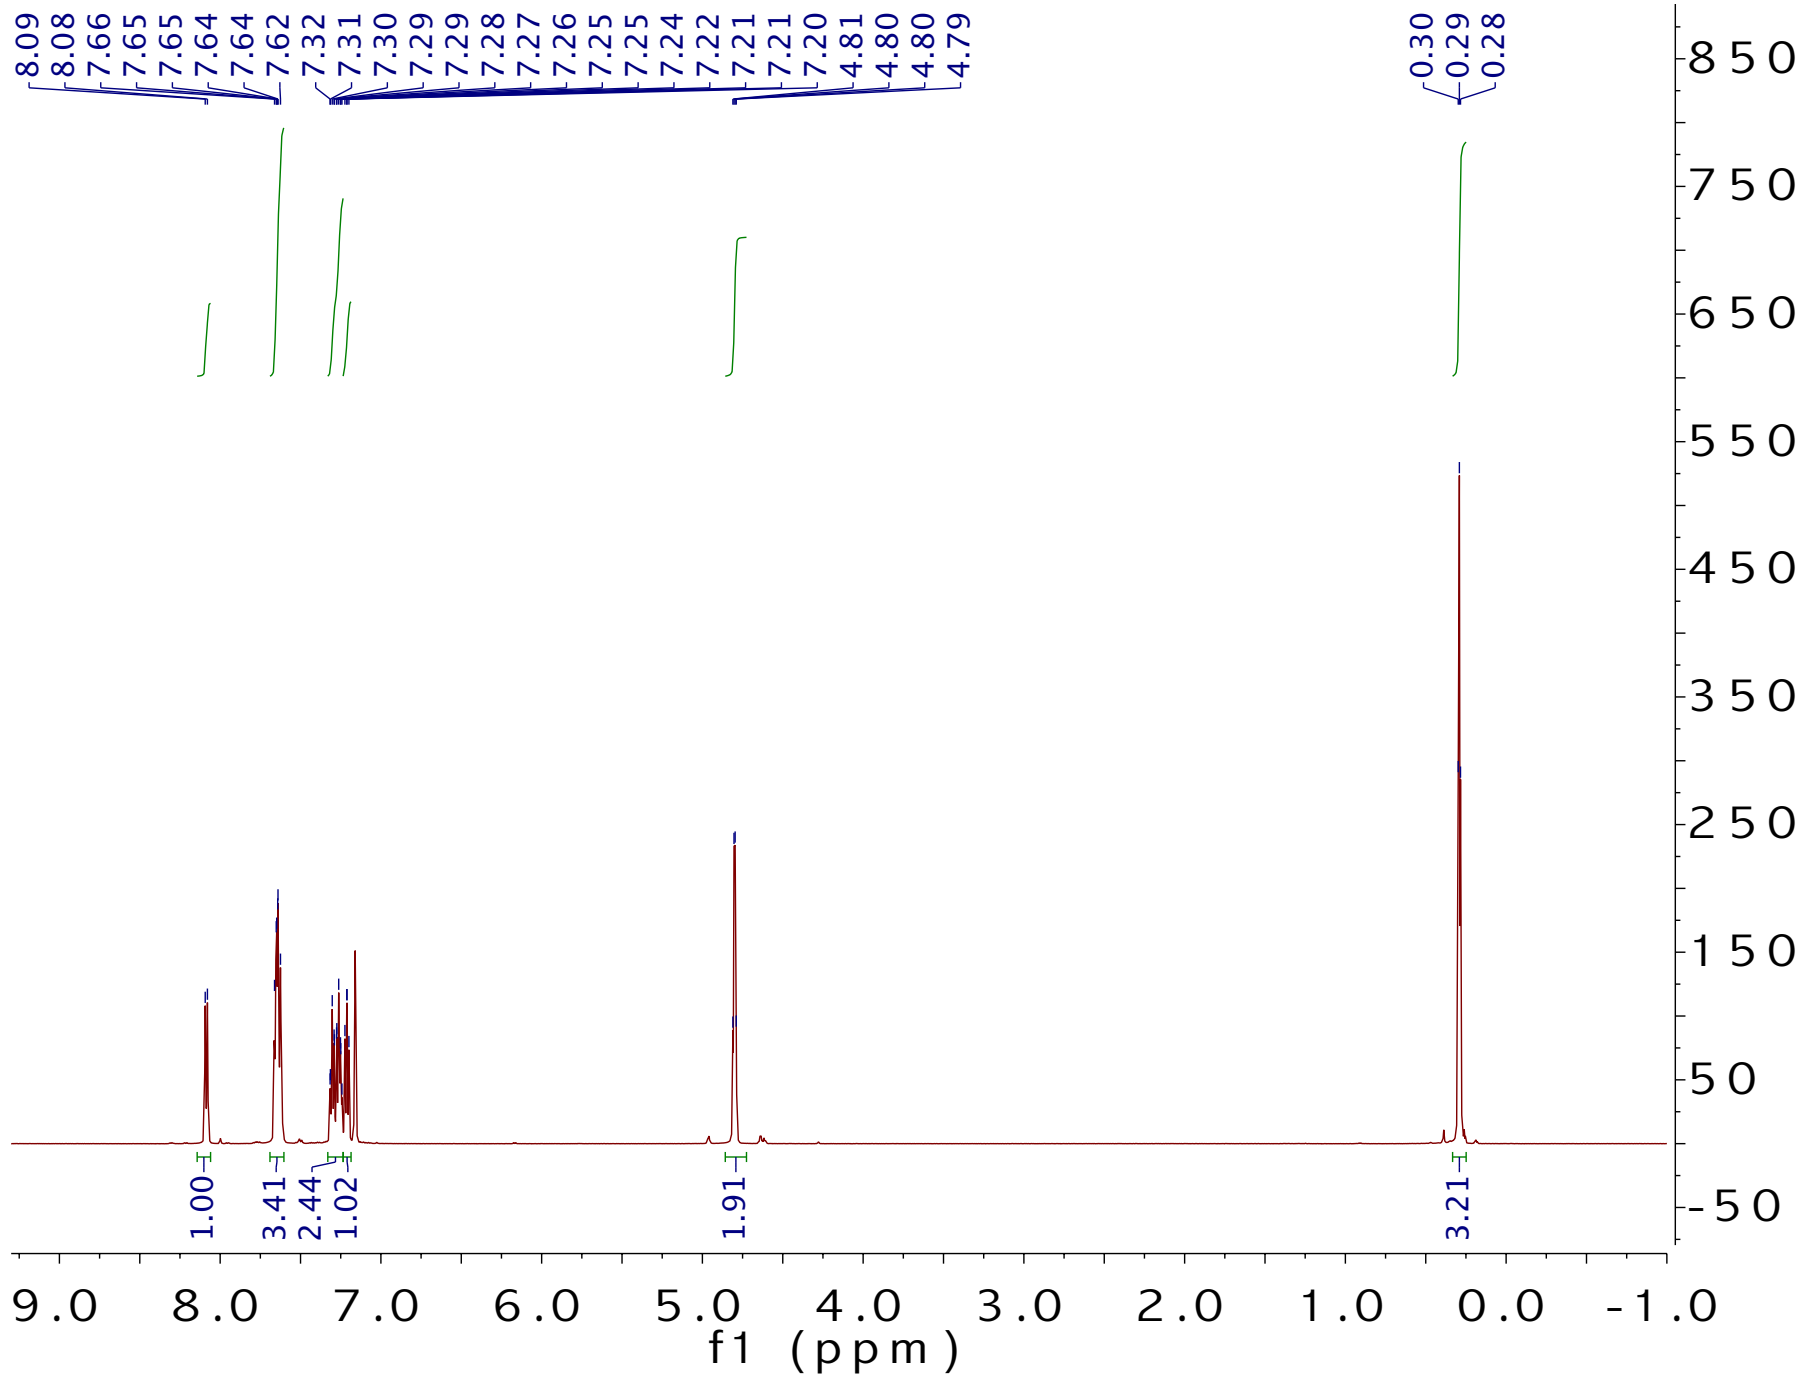

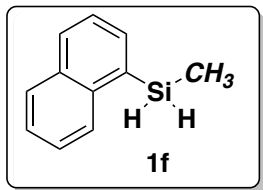

$^{13}\text{C}$ , 151 MHz,  $\text{CDCl}_3$

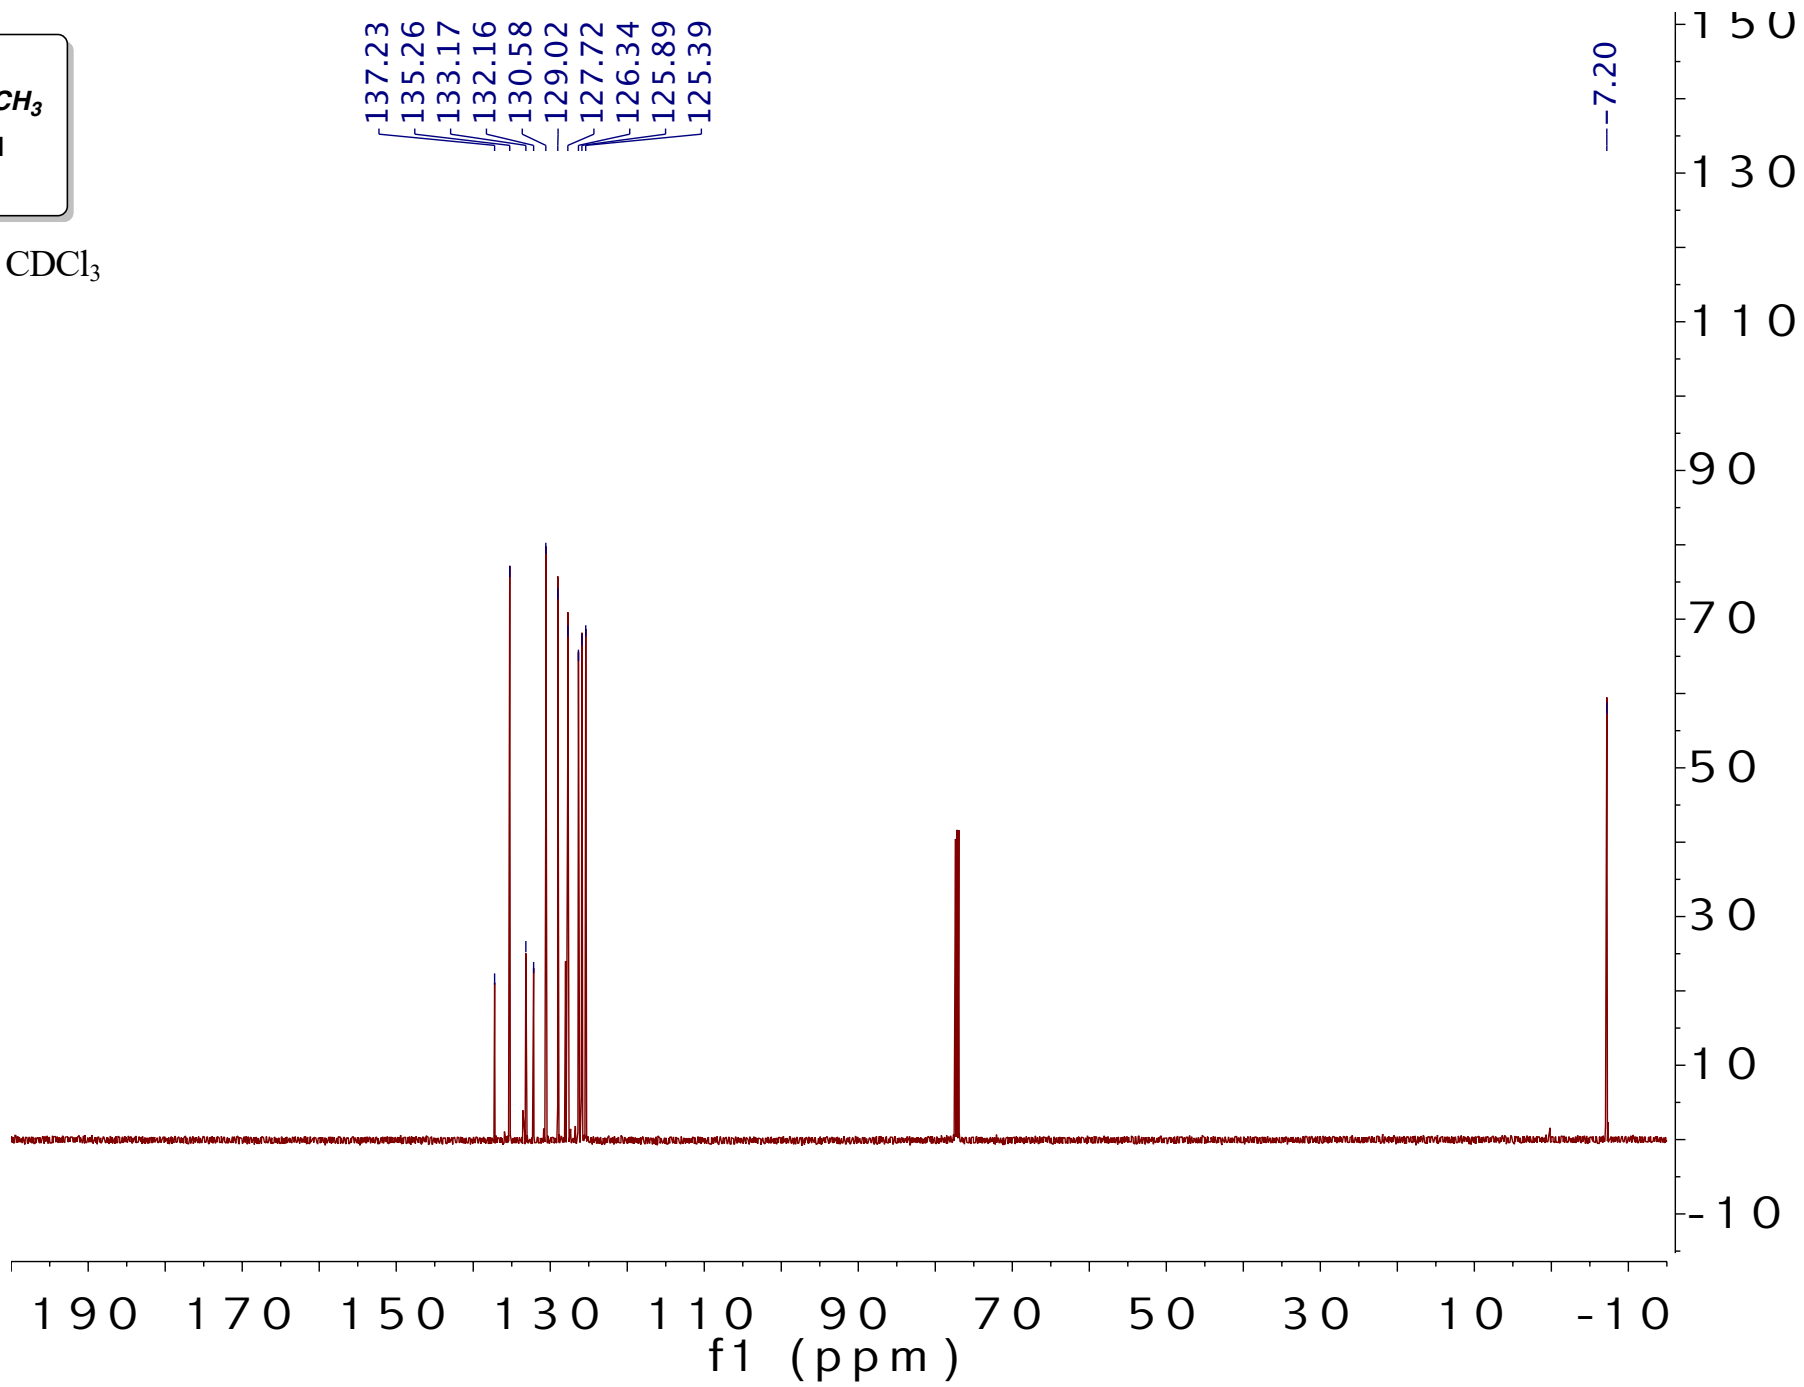

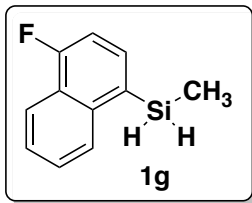

$^1\text{H}$ , 400 MHz,  $\text{CDCl}_3$

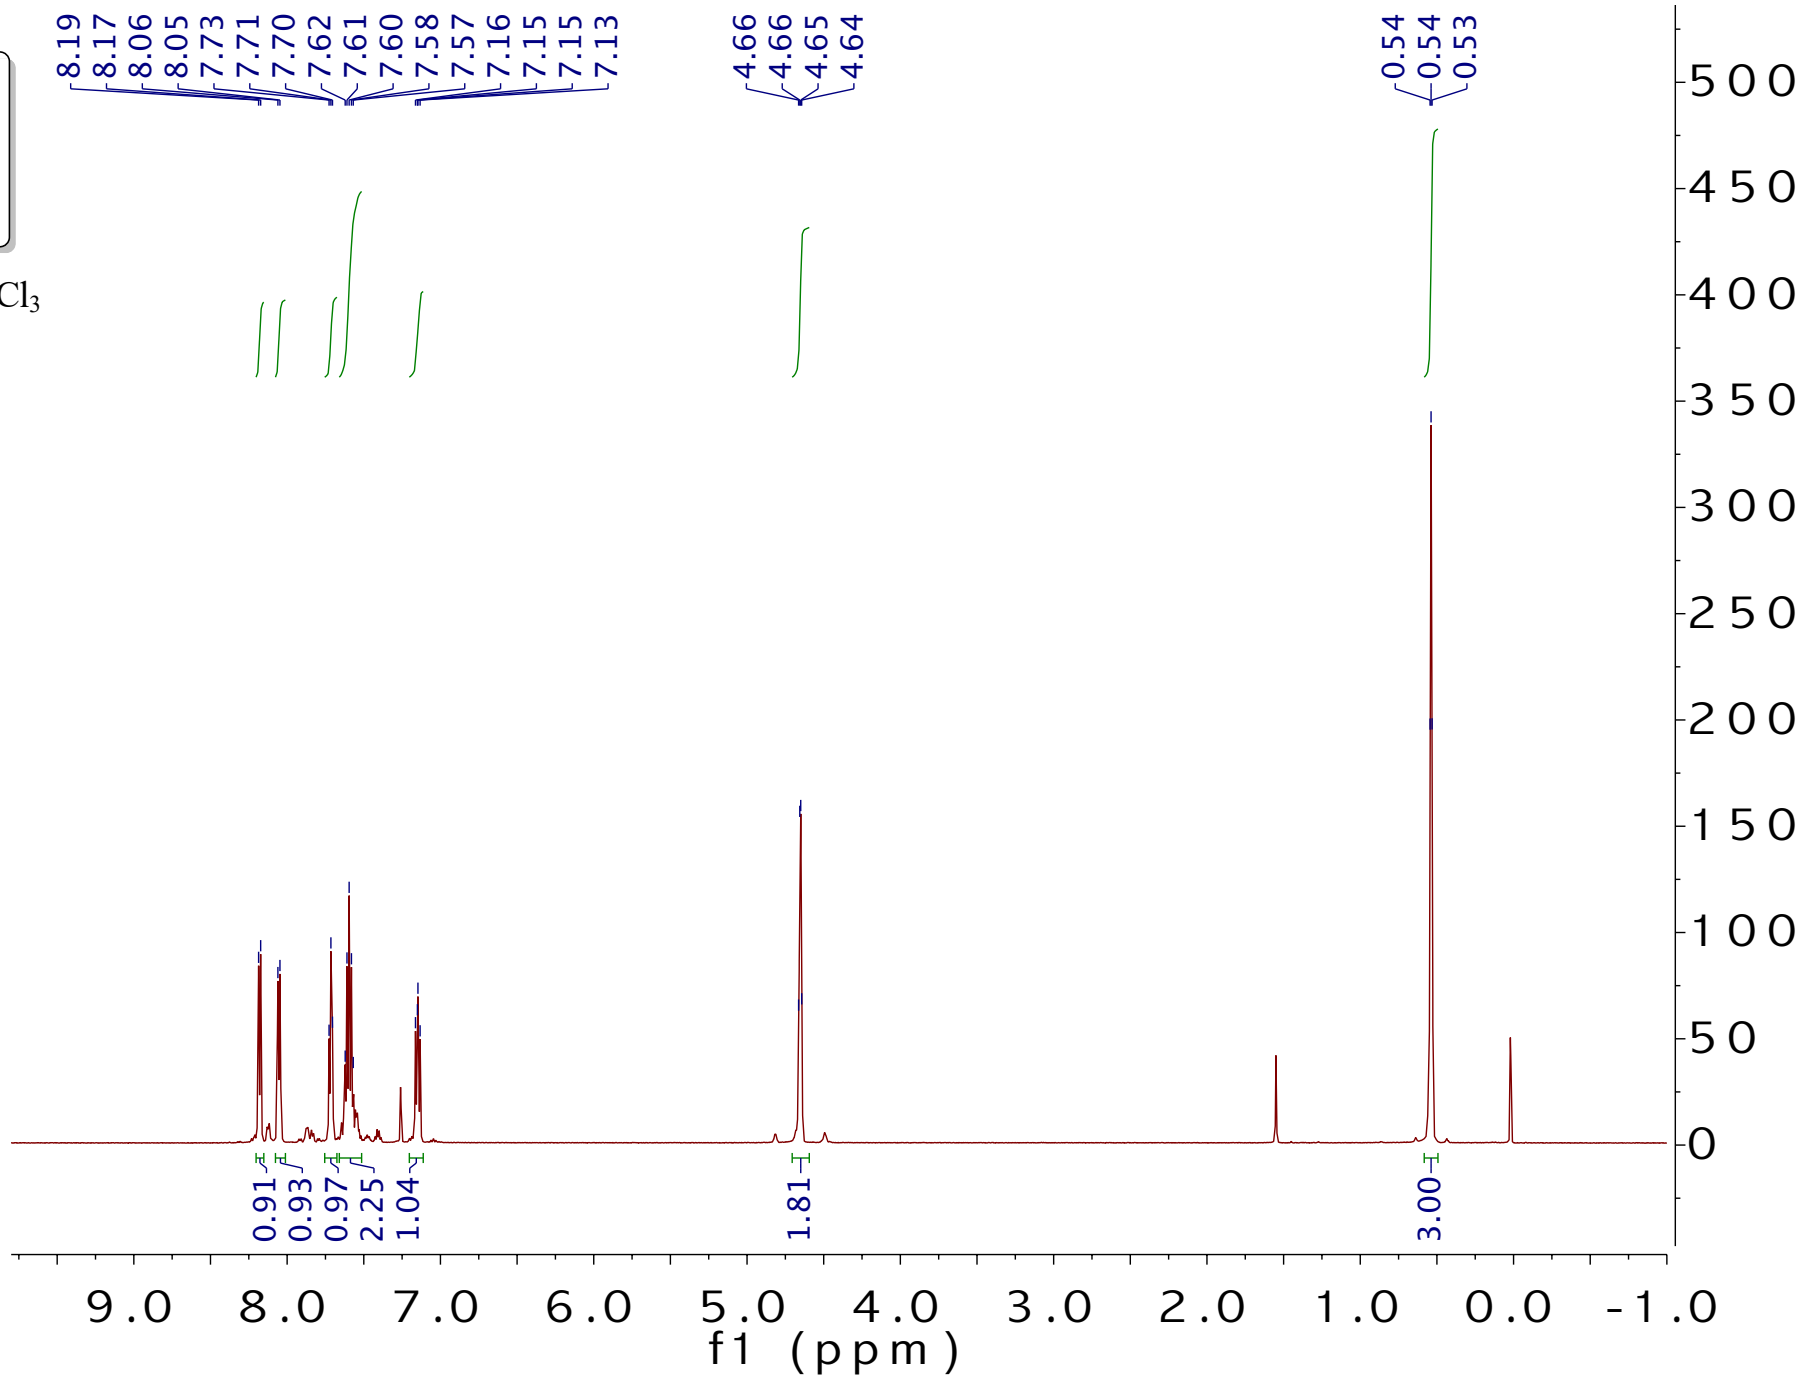

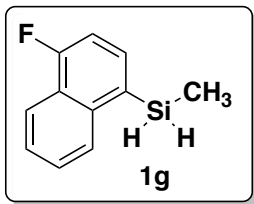

$^{13}\text{C}$ , 151 MHz,  $\text{CDCl}_3$

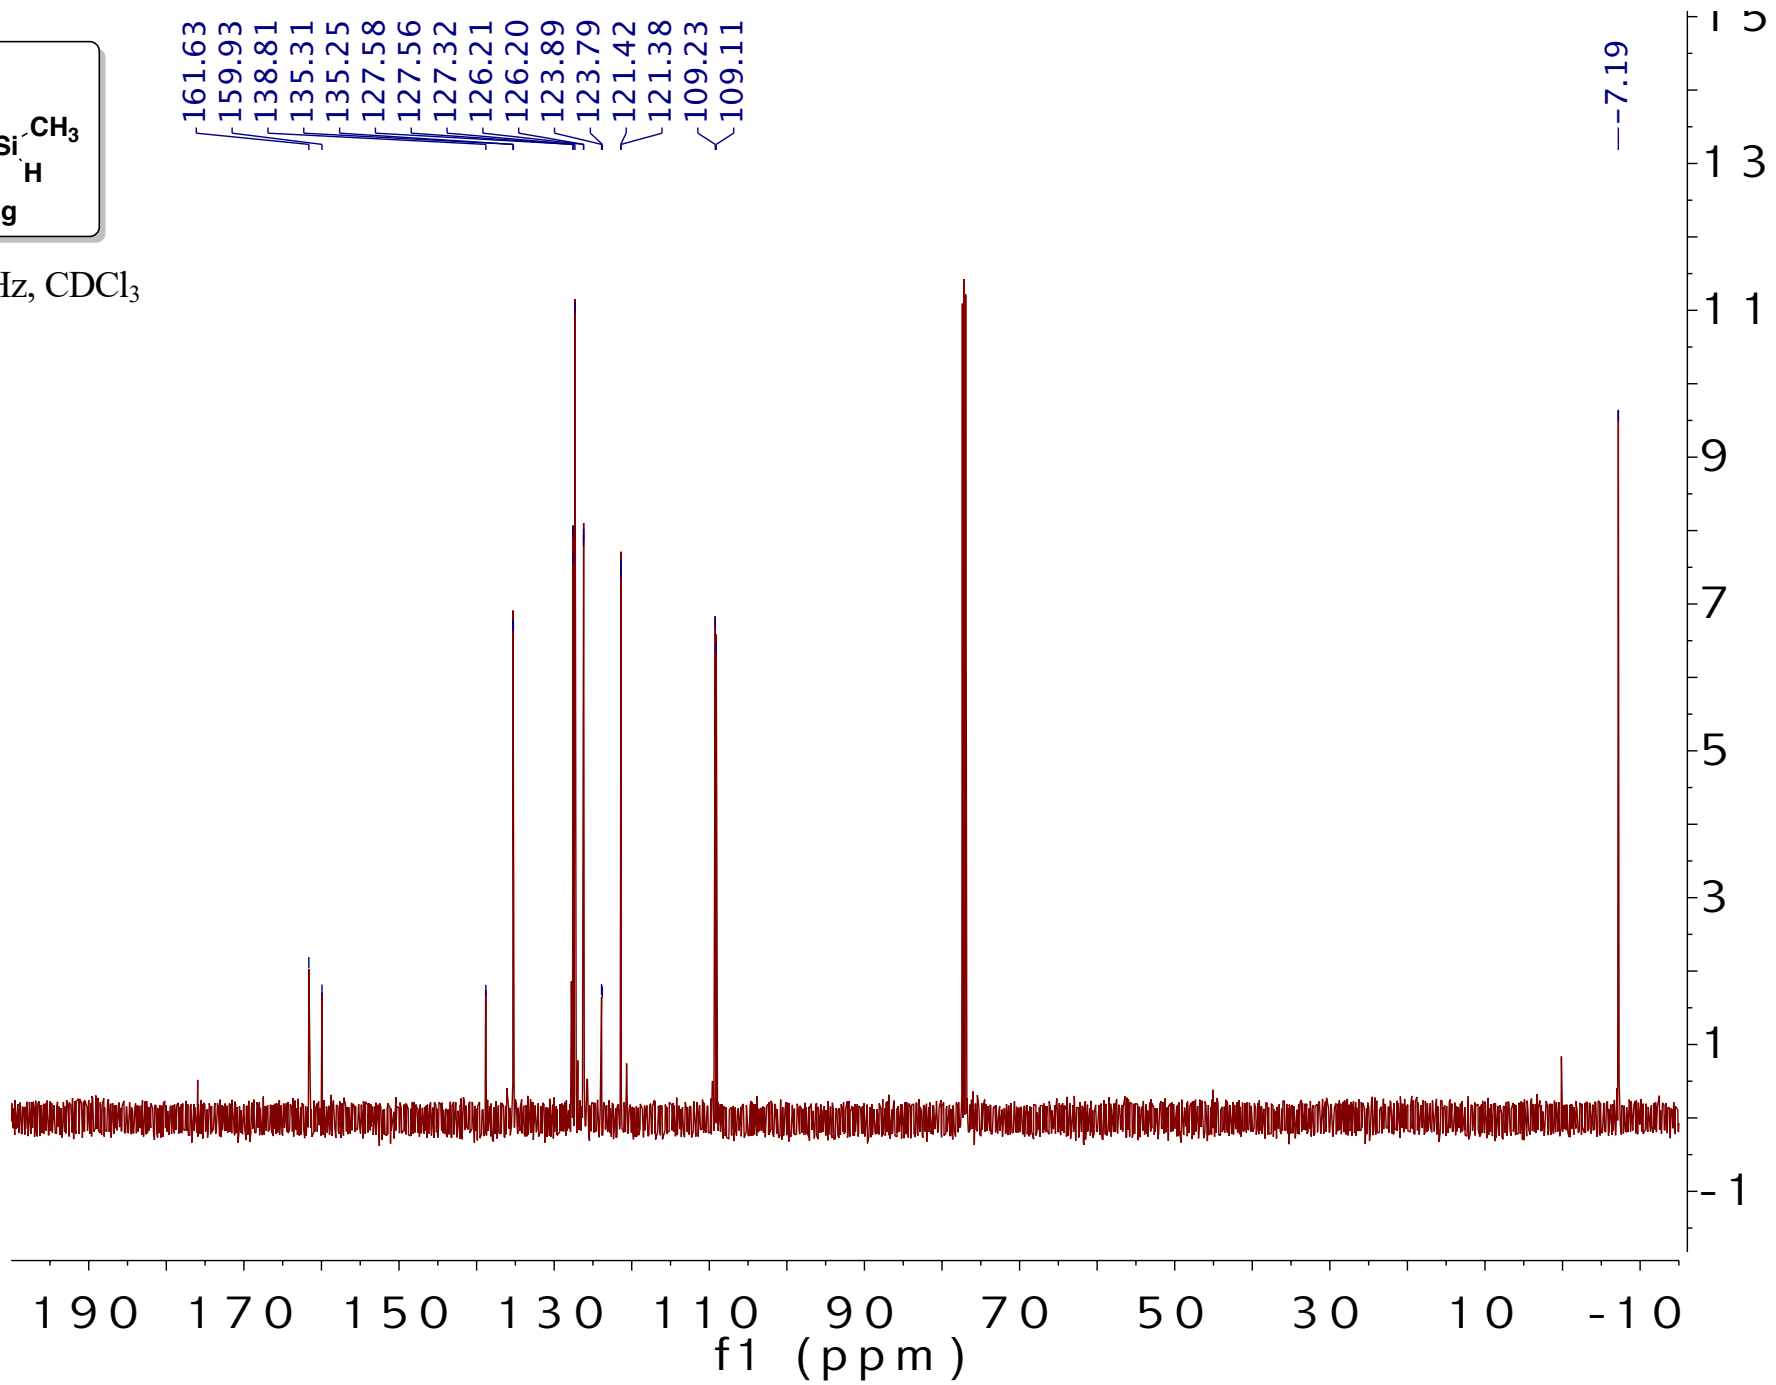

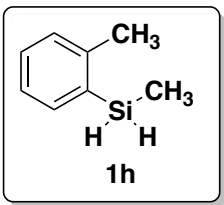

$^1\text{H}$ , 600 MHz,  $\text{CDCl}_3$

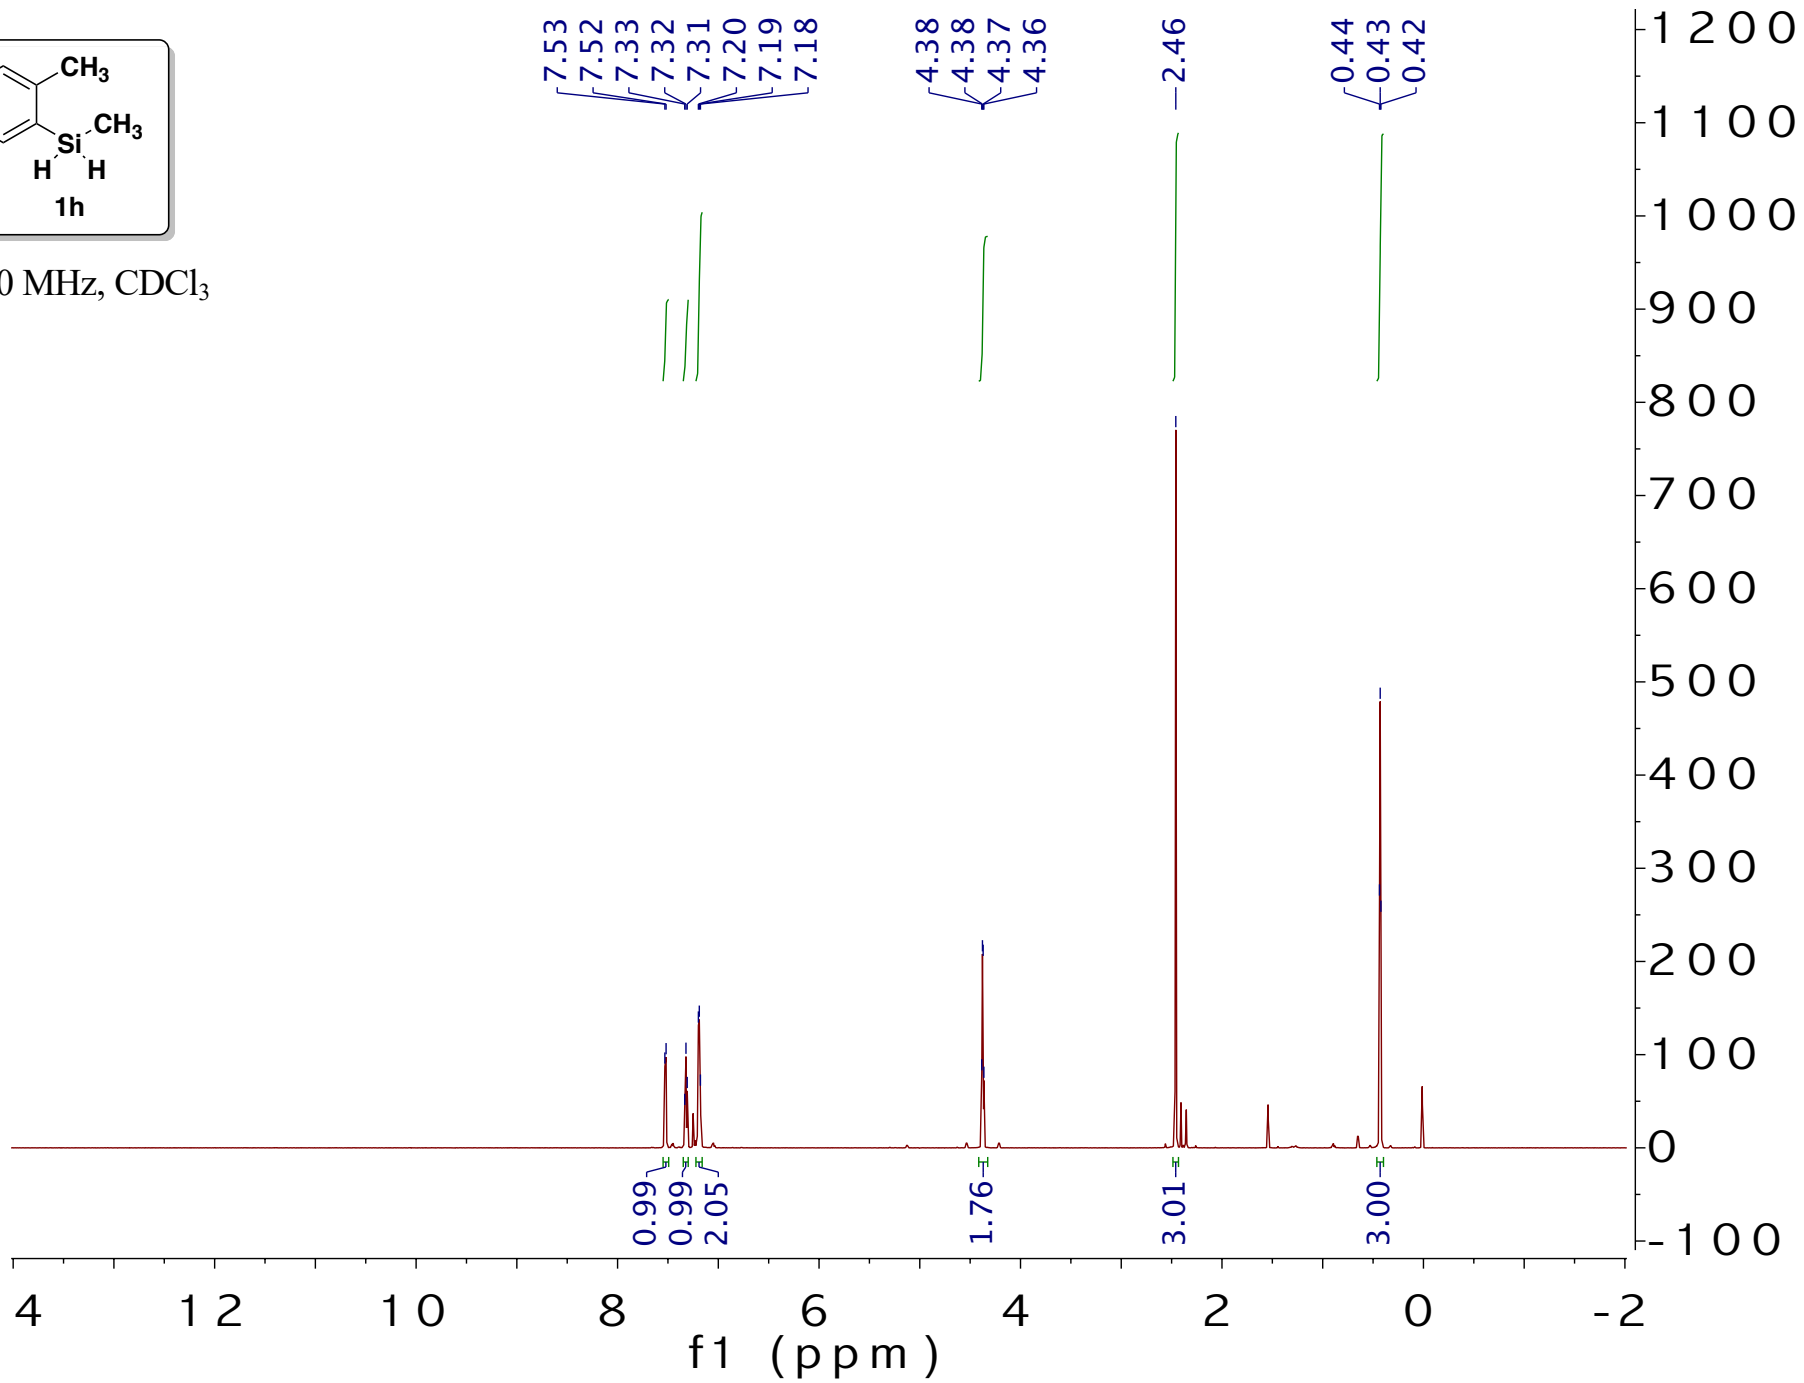



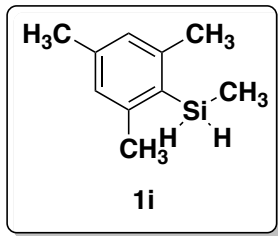

<sup>1</sup>H, 400 MHz, CDCl<sub>3</sub>

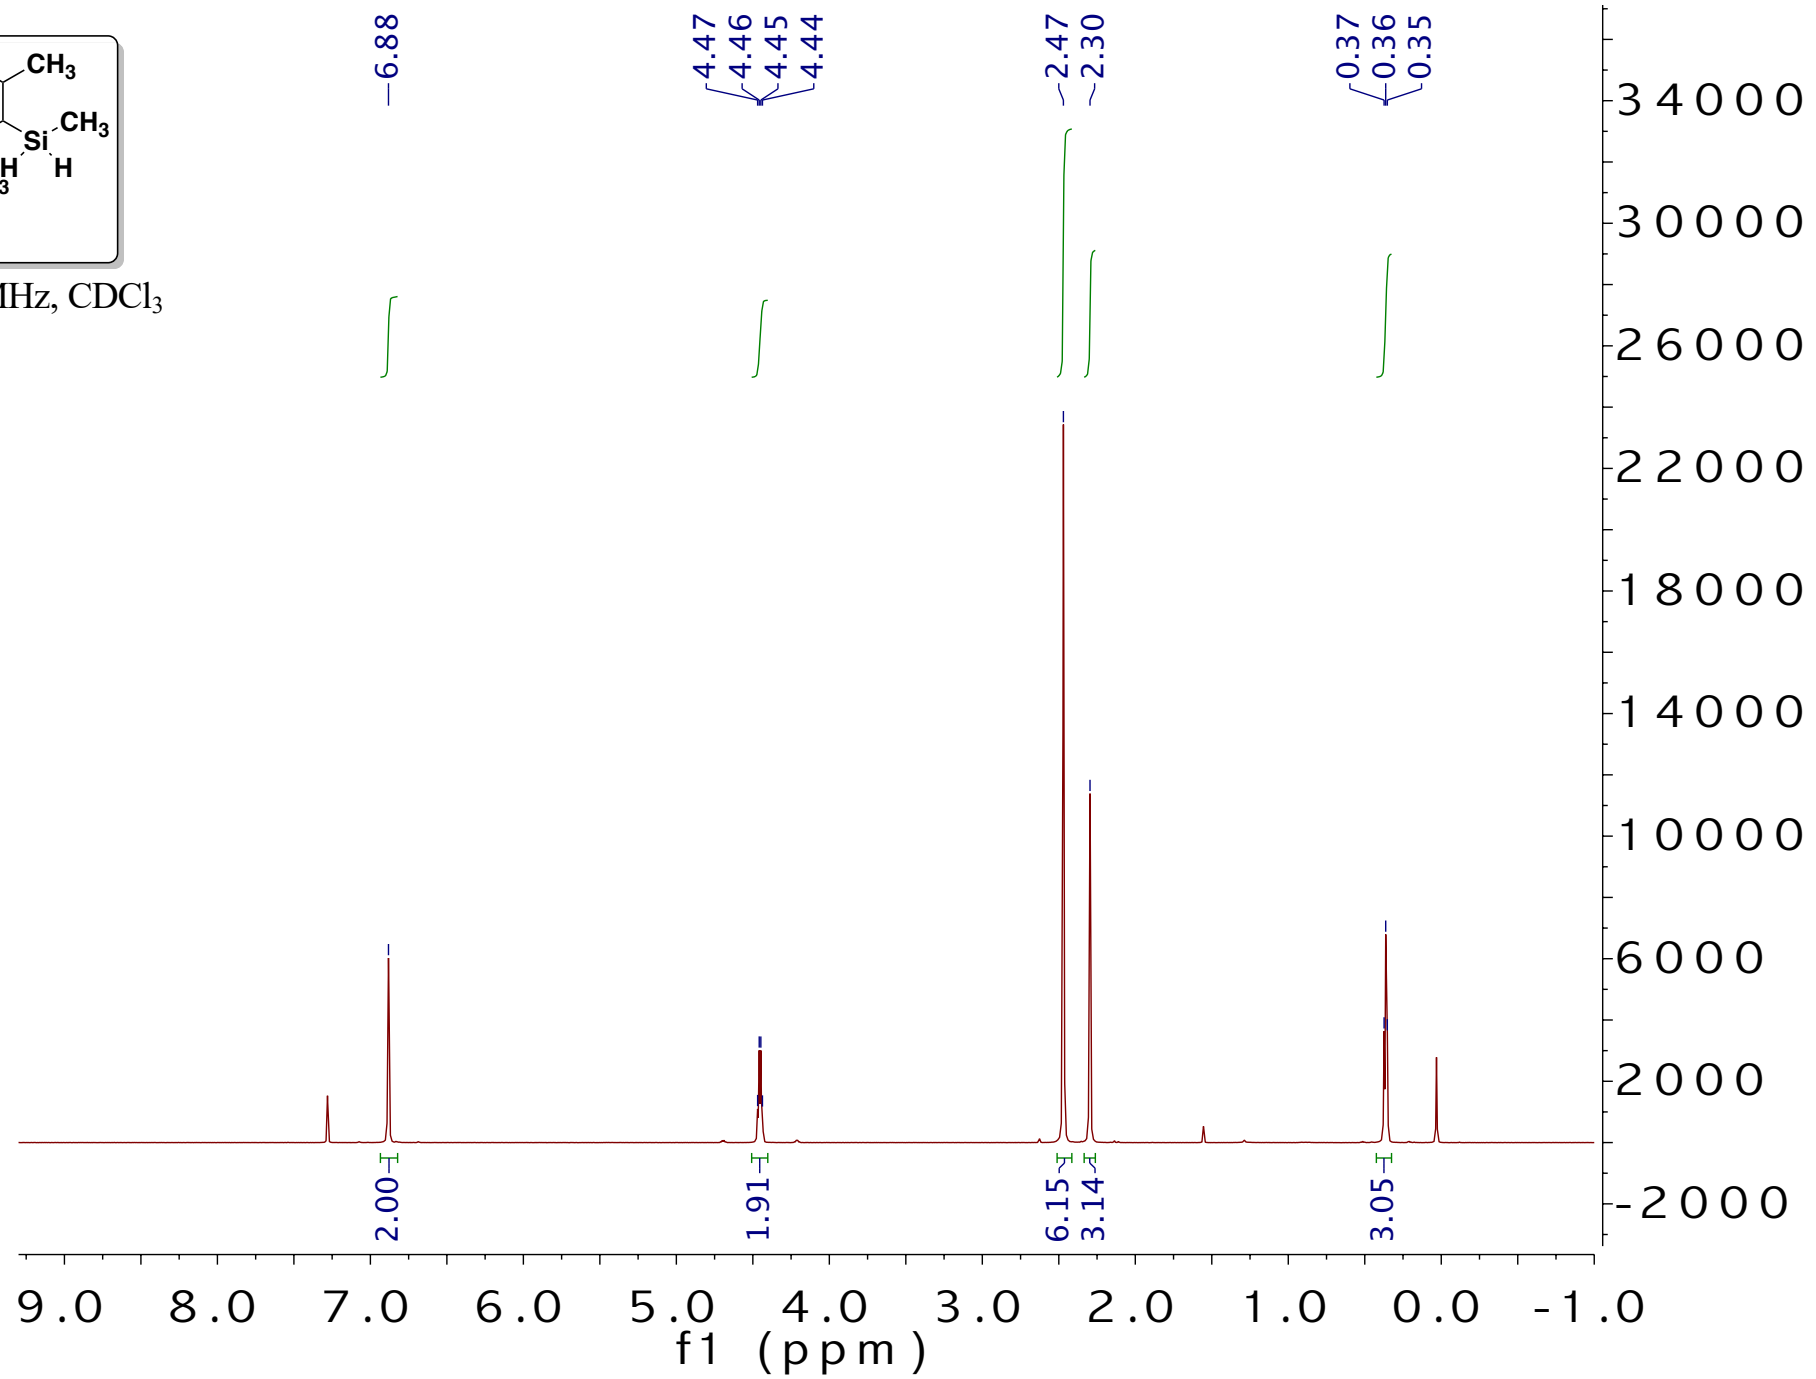

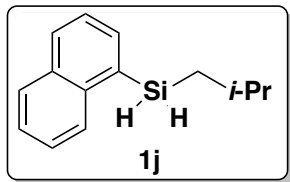

$^1\text{H}$ , 600 MHz,  $\text{C}_6\text{D}_6$

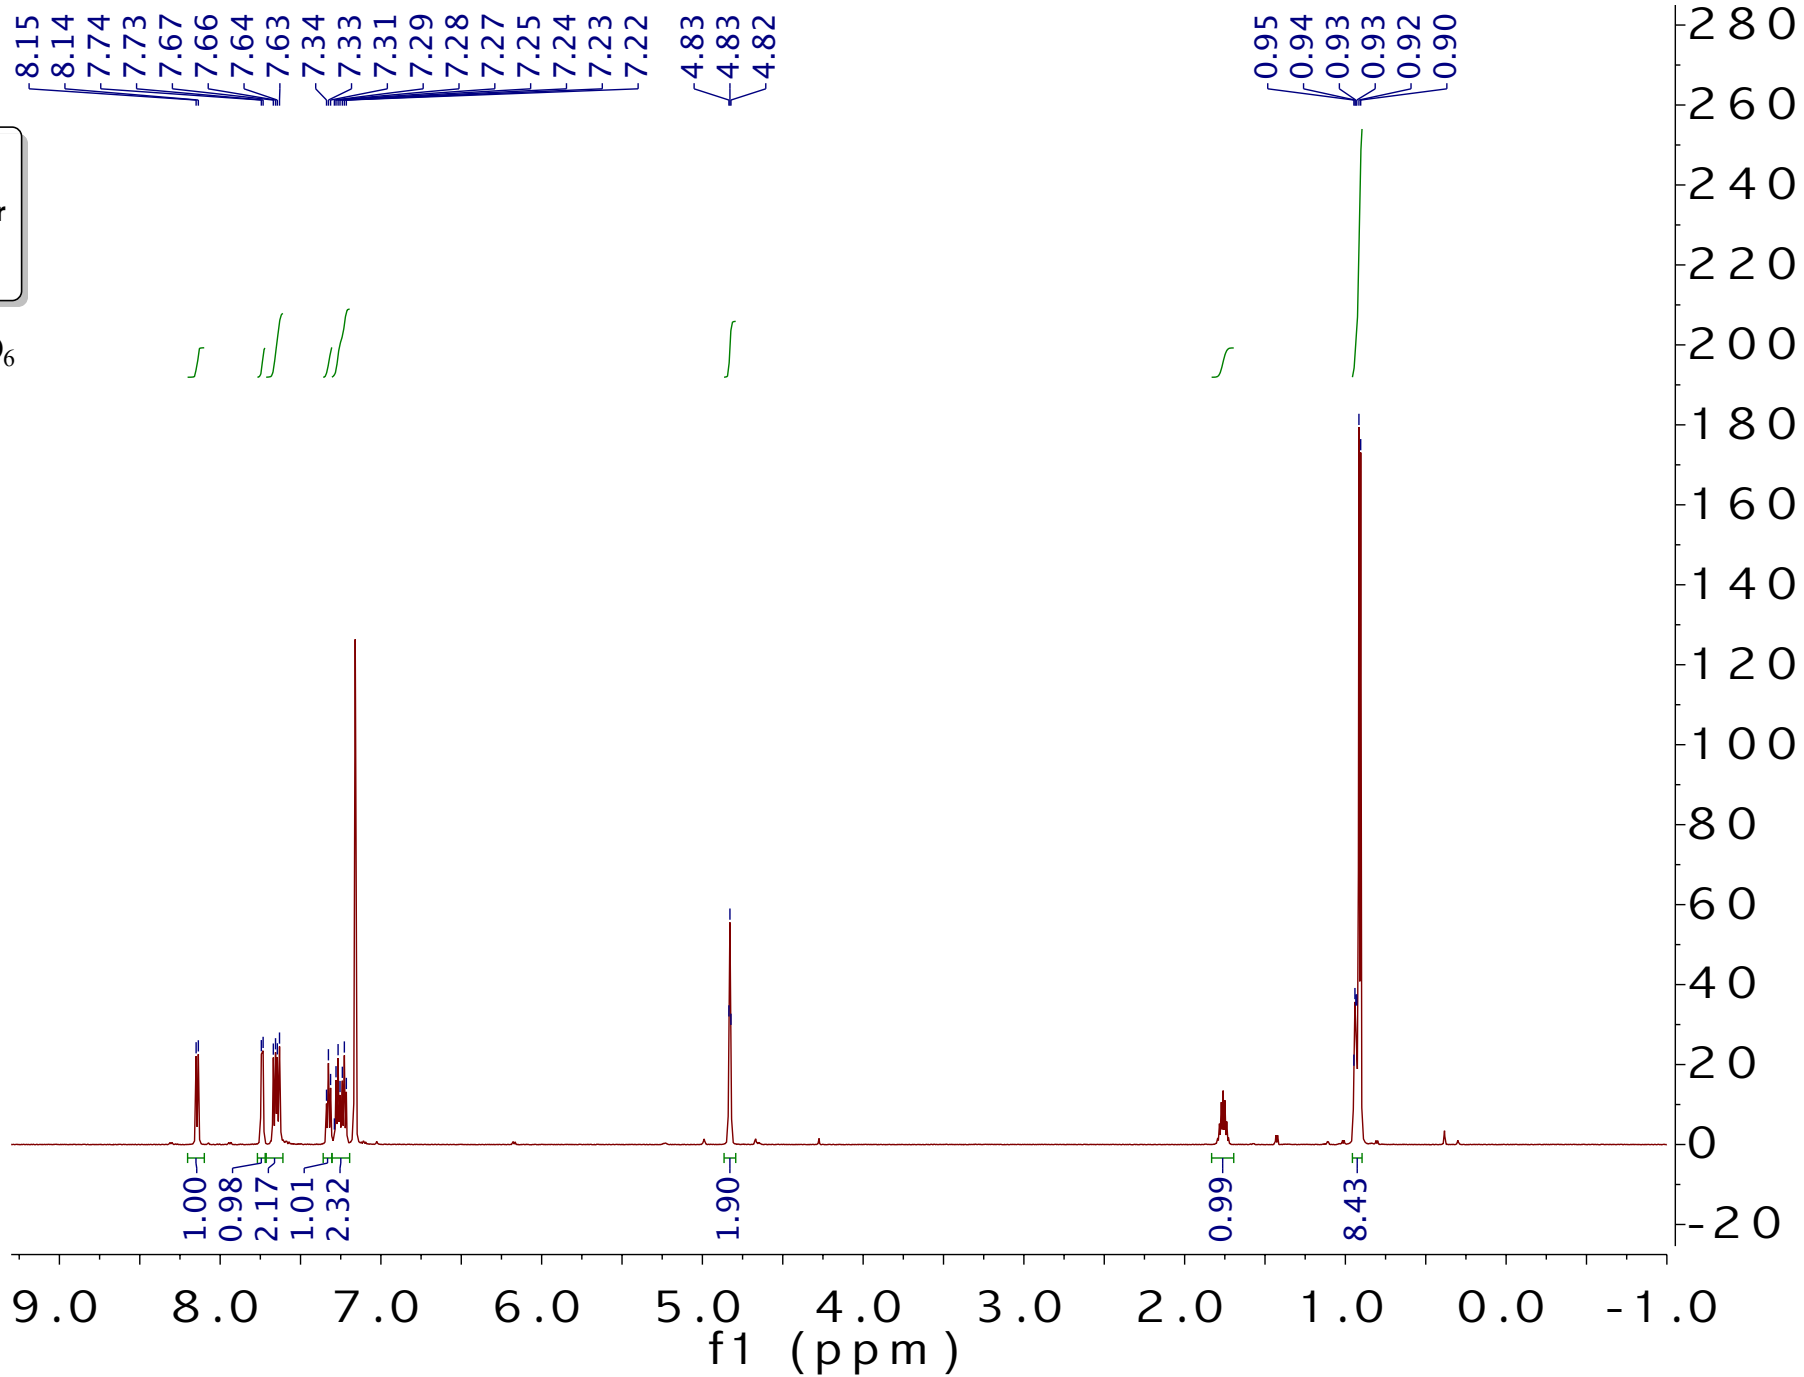

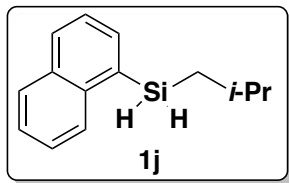

$^{13}\text{C}$ , 151 MHz,  $\text{CDCl}_3$

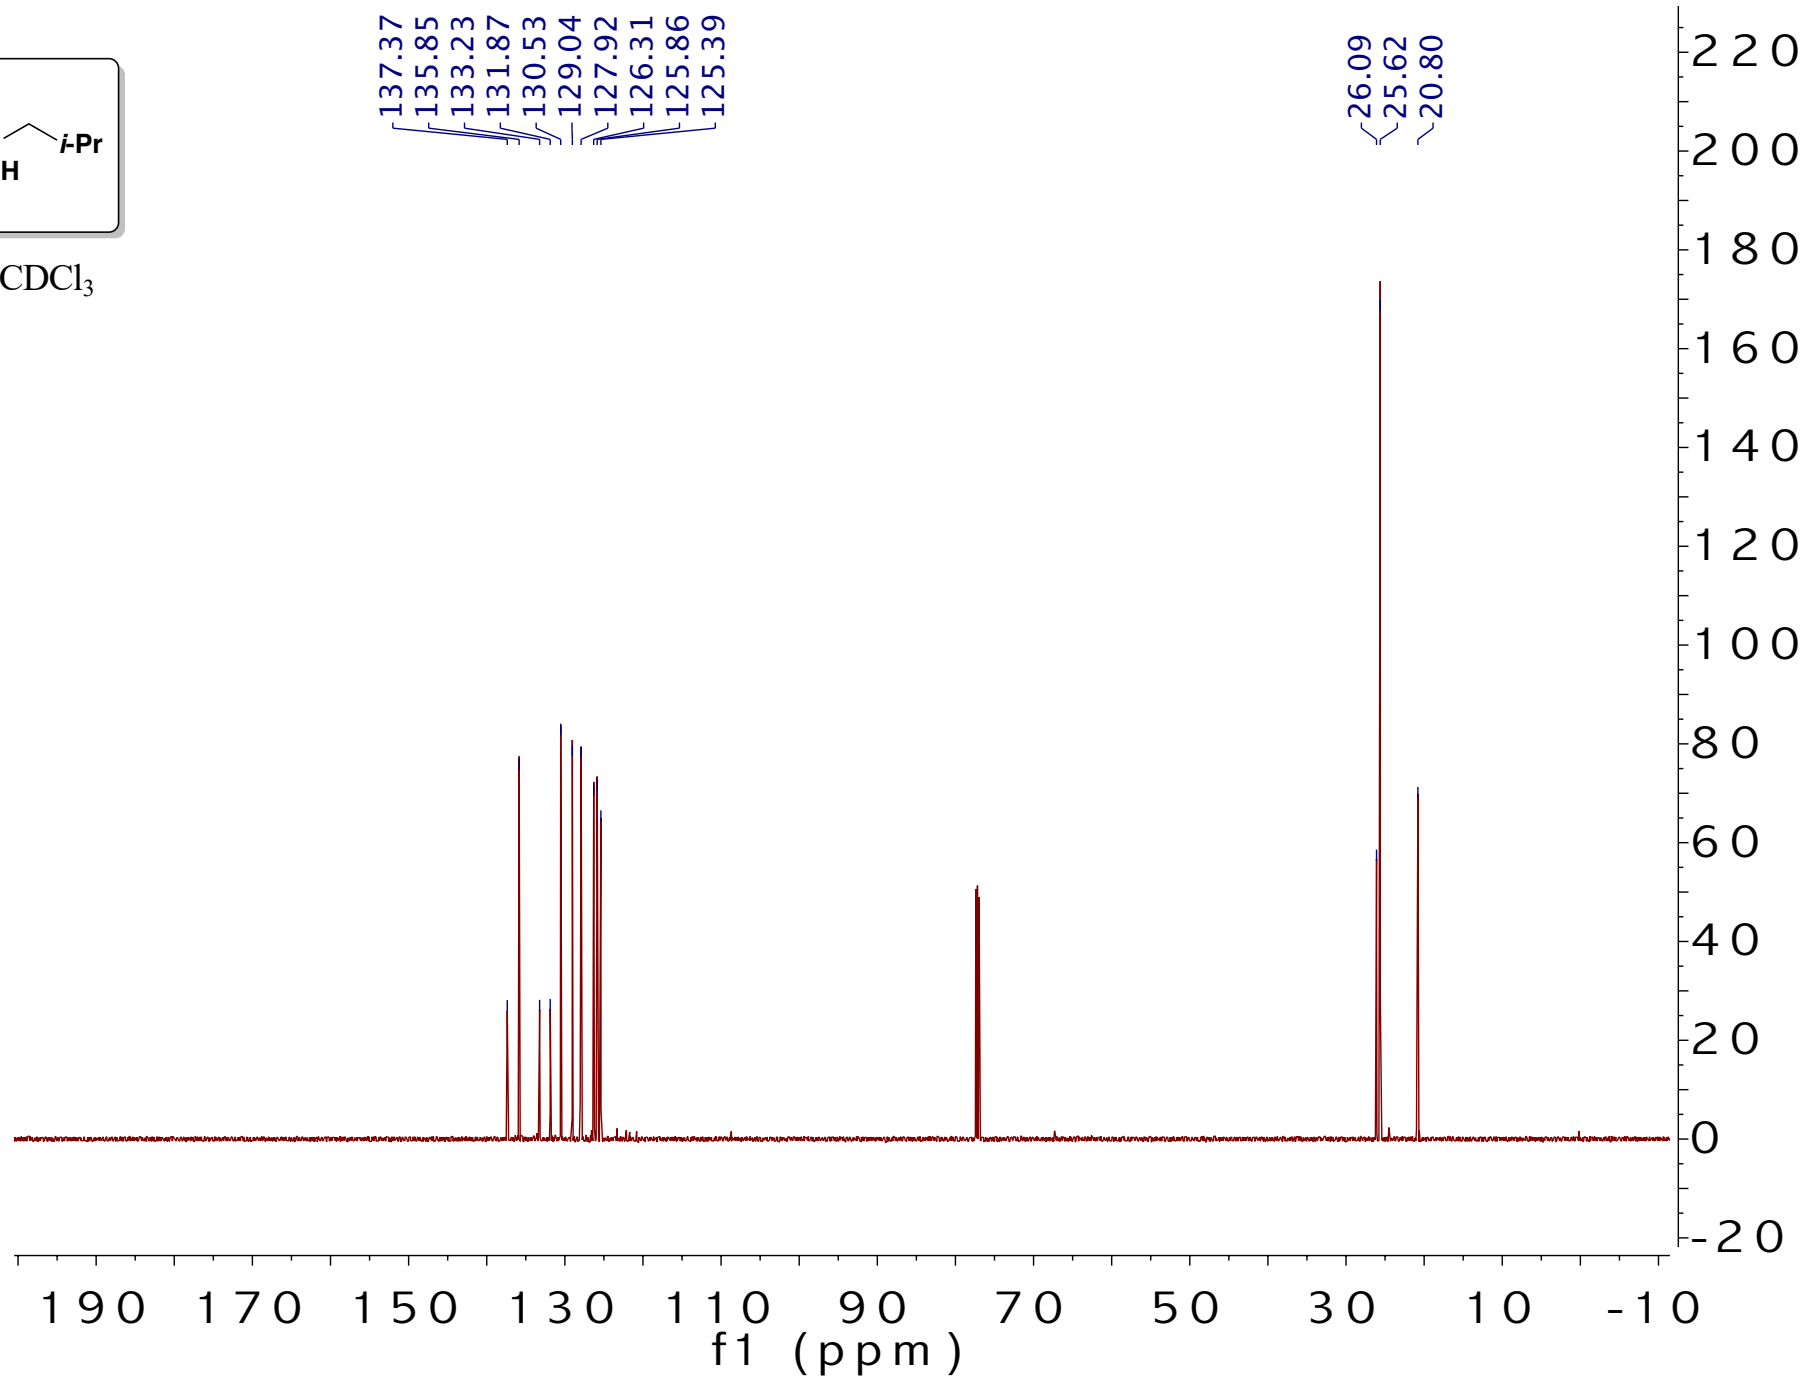

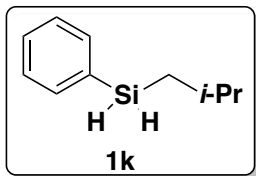

<sup>1</sup>H, 600 MHz, CDCl<sub>3</sub>

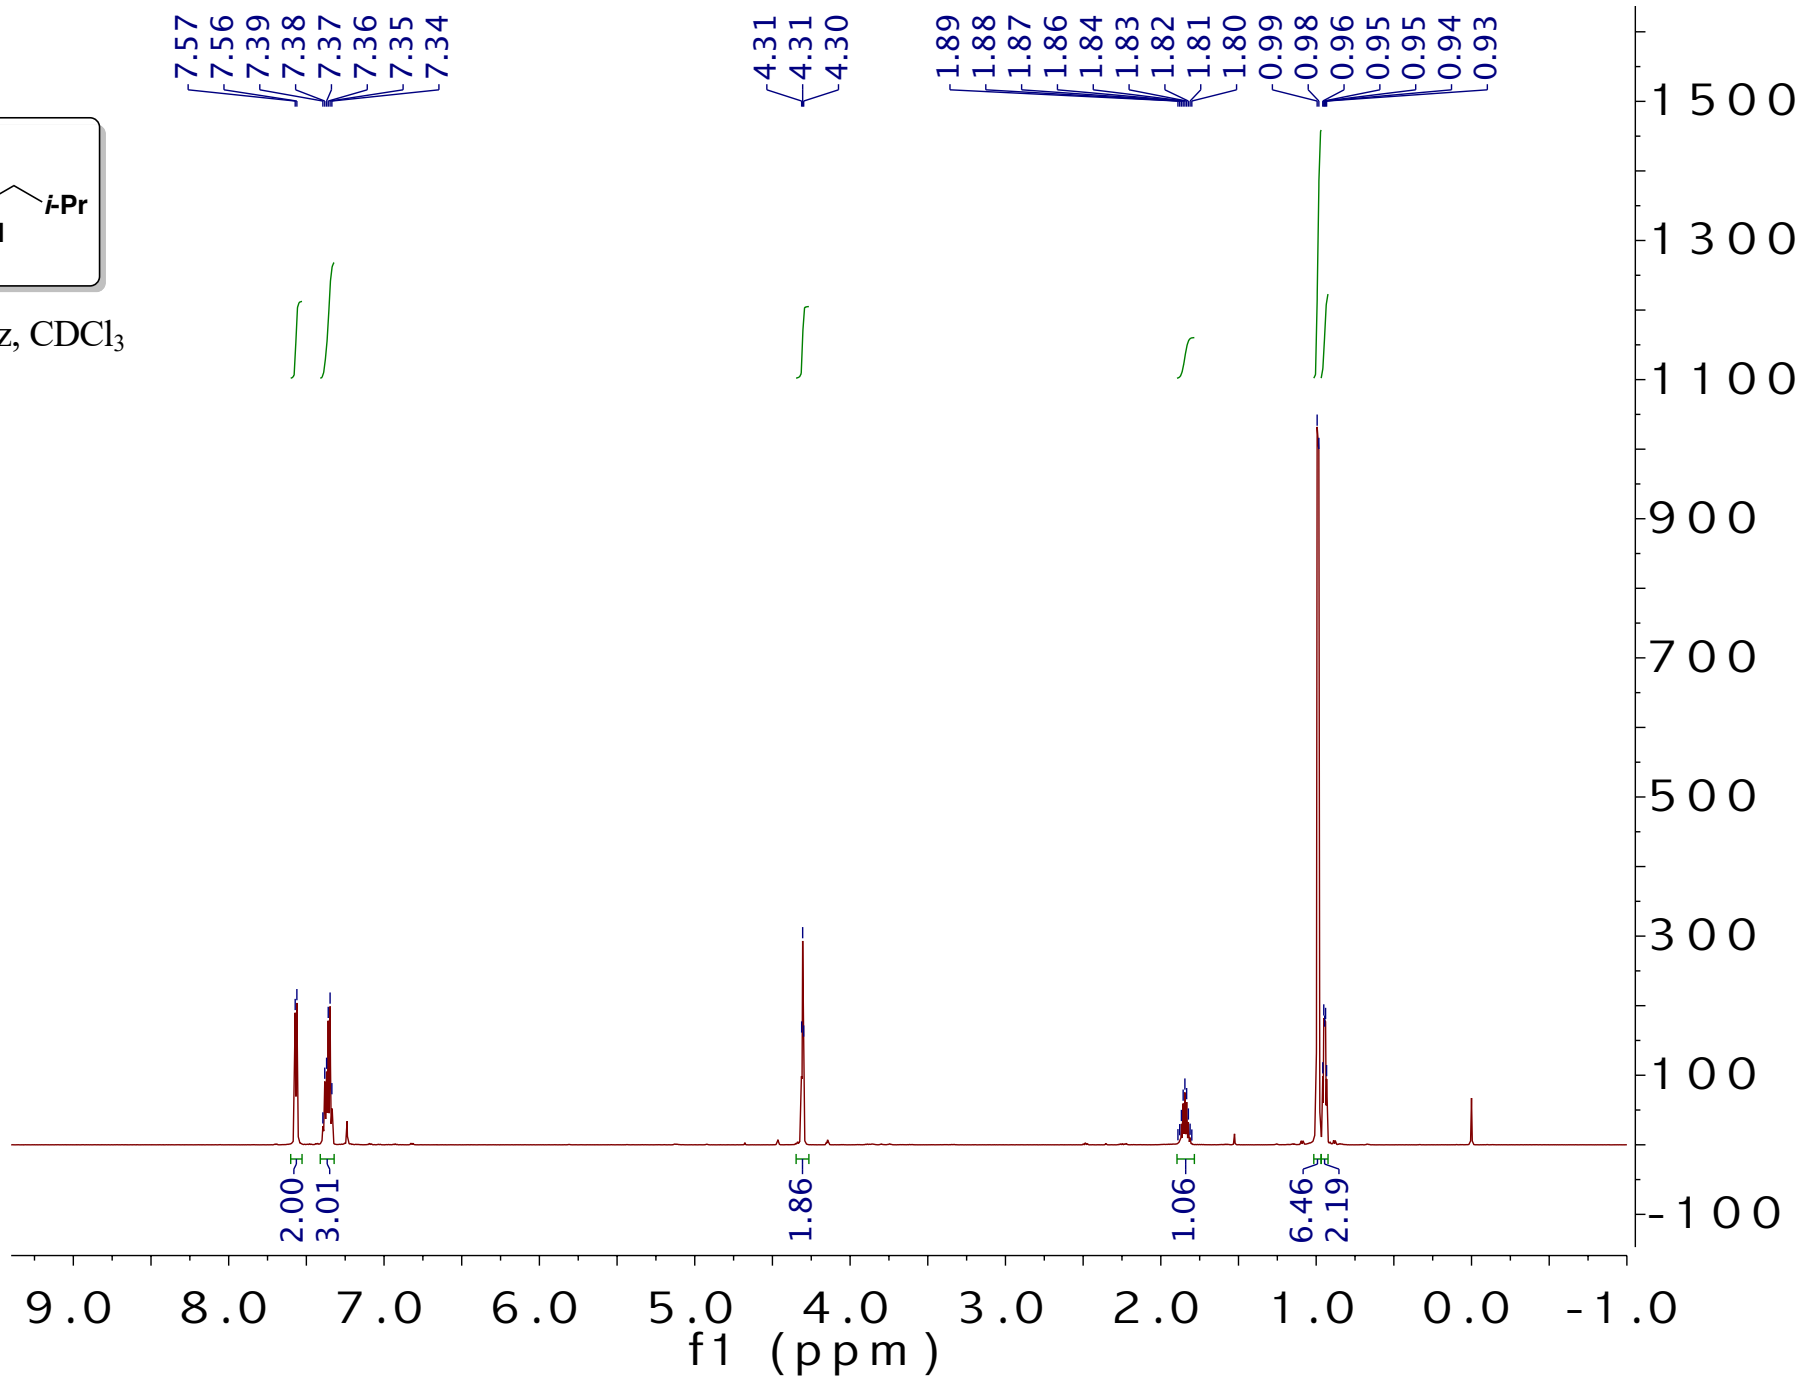

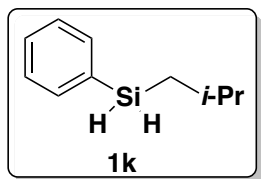

$^{13}\text{C}$ , 151 MHz,  $\text{CDCl}_3$

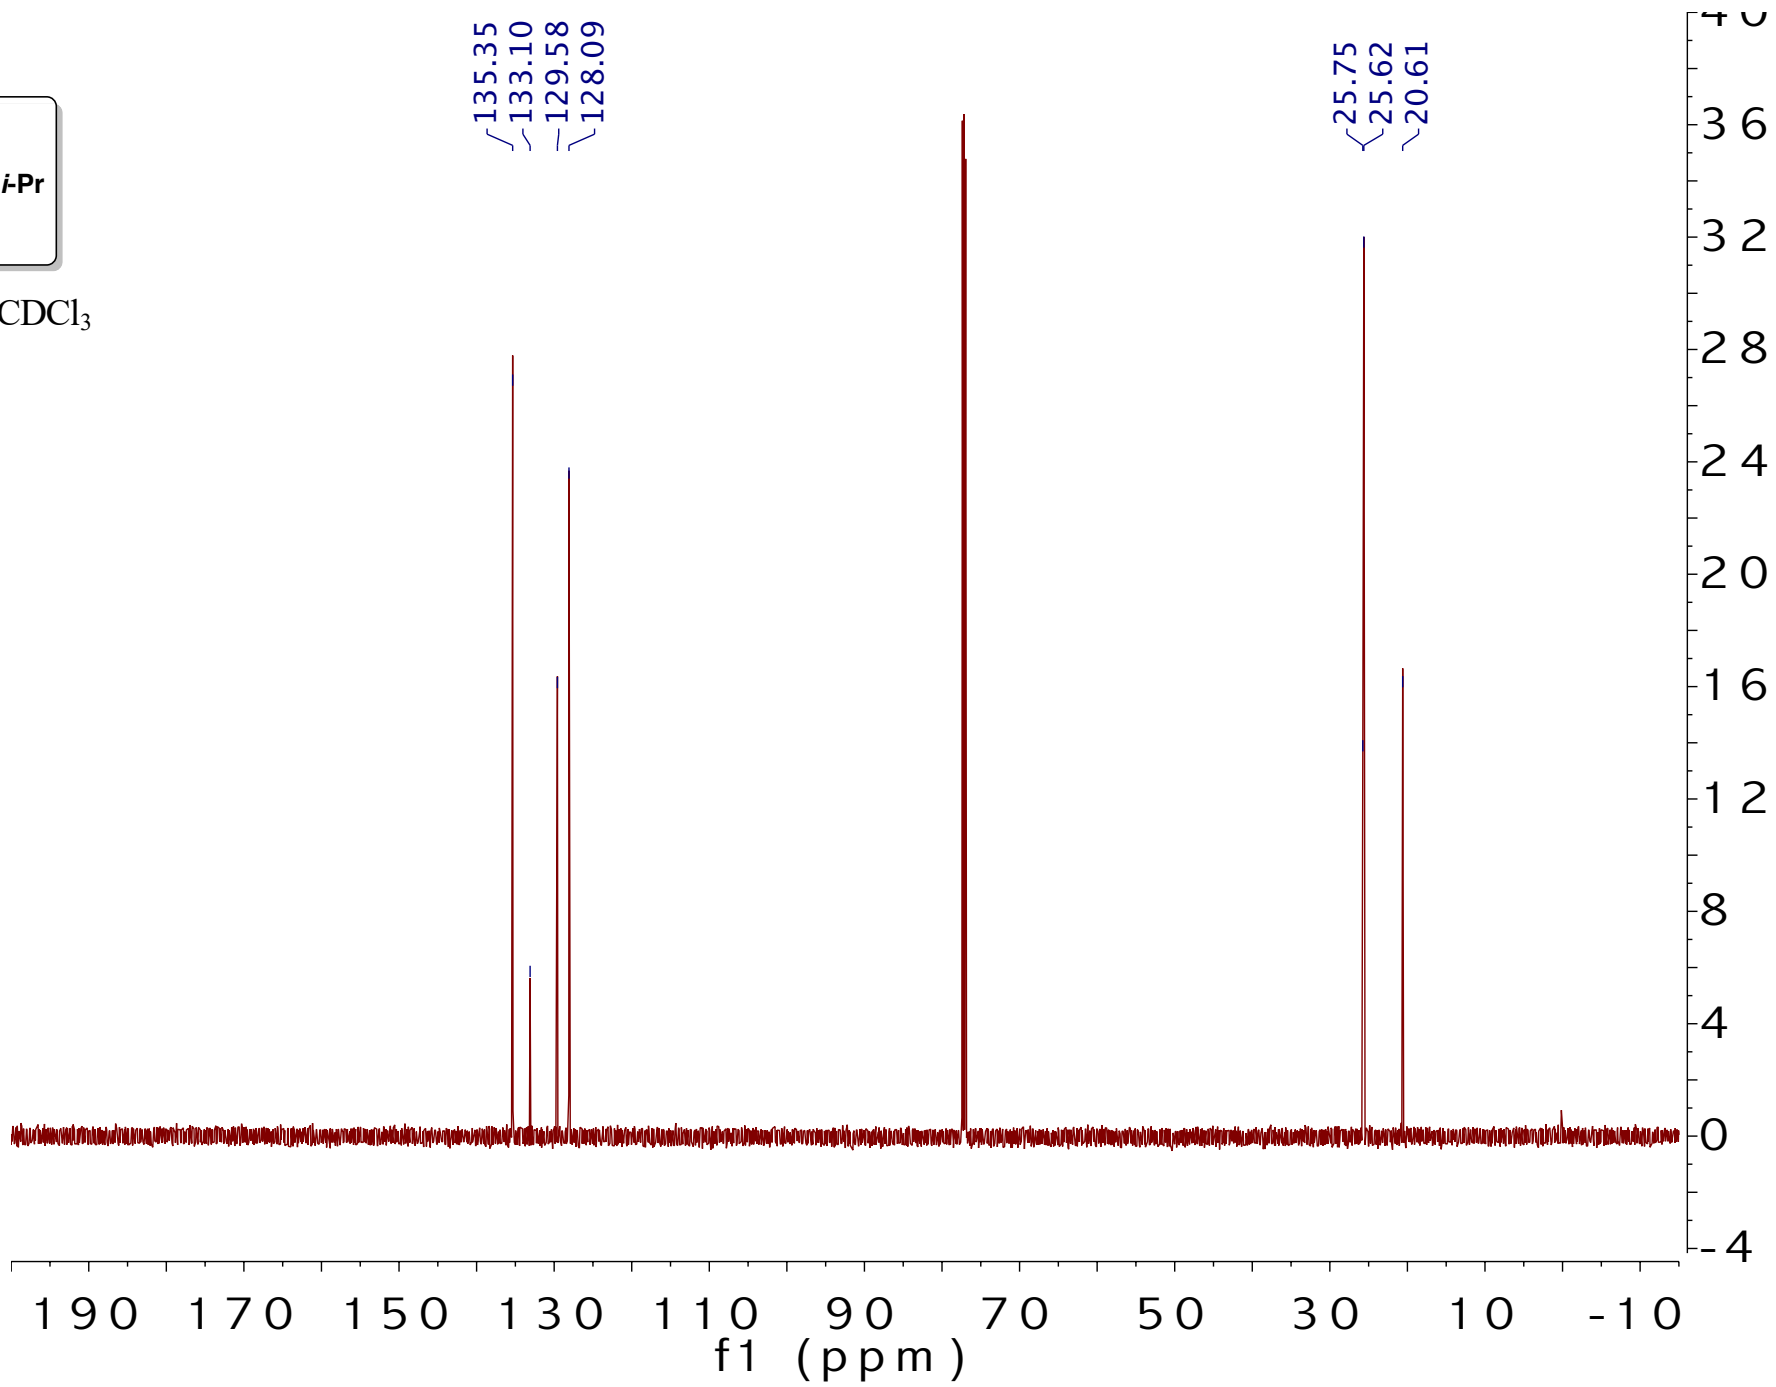

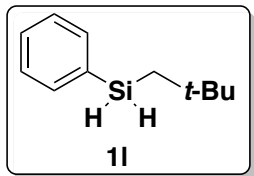

$^1\text{H}$ , 600 MHz,  $\text{CDCl}_3$

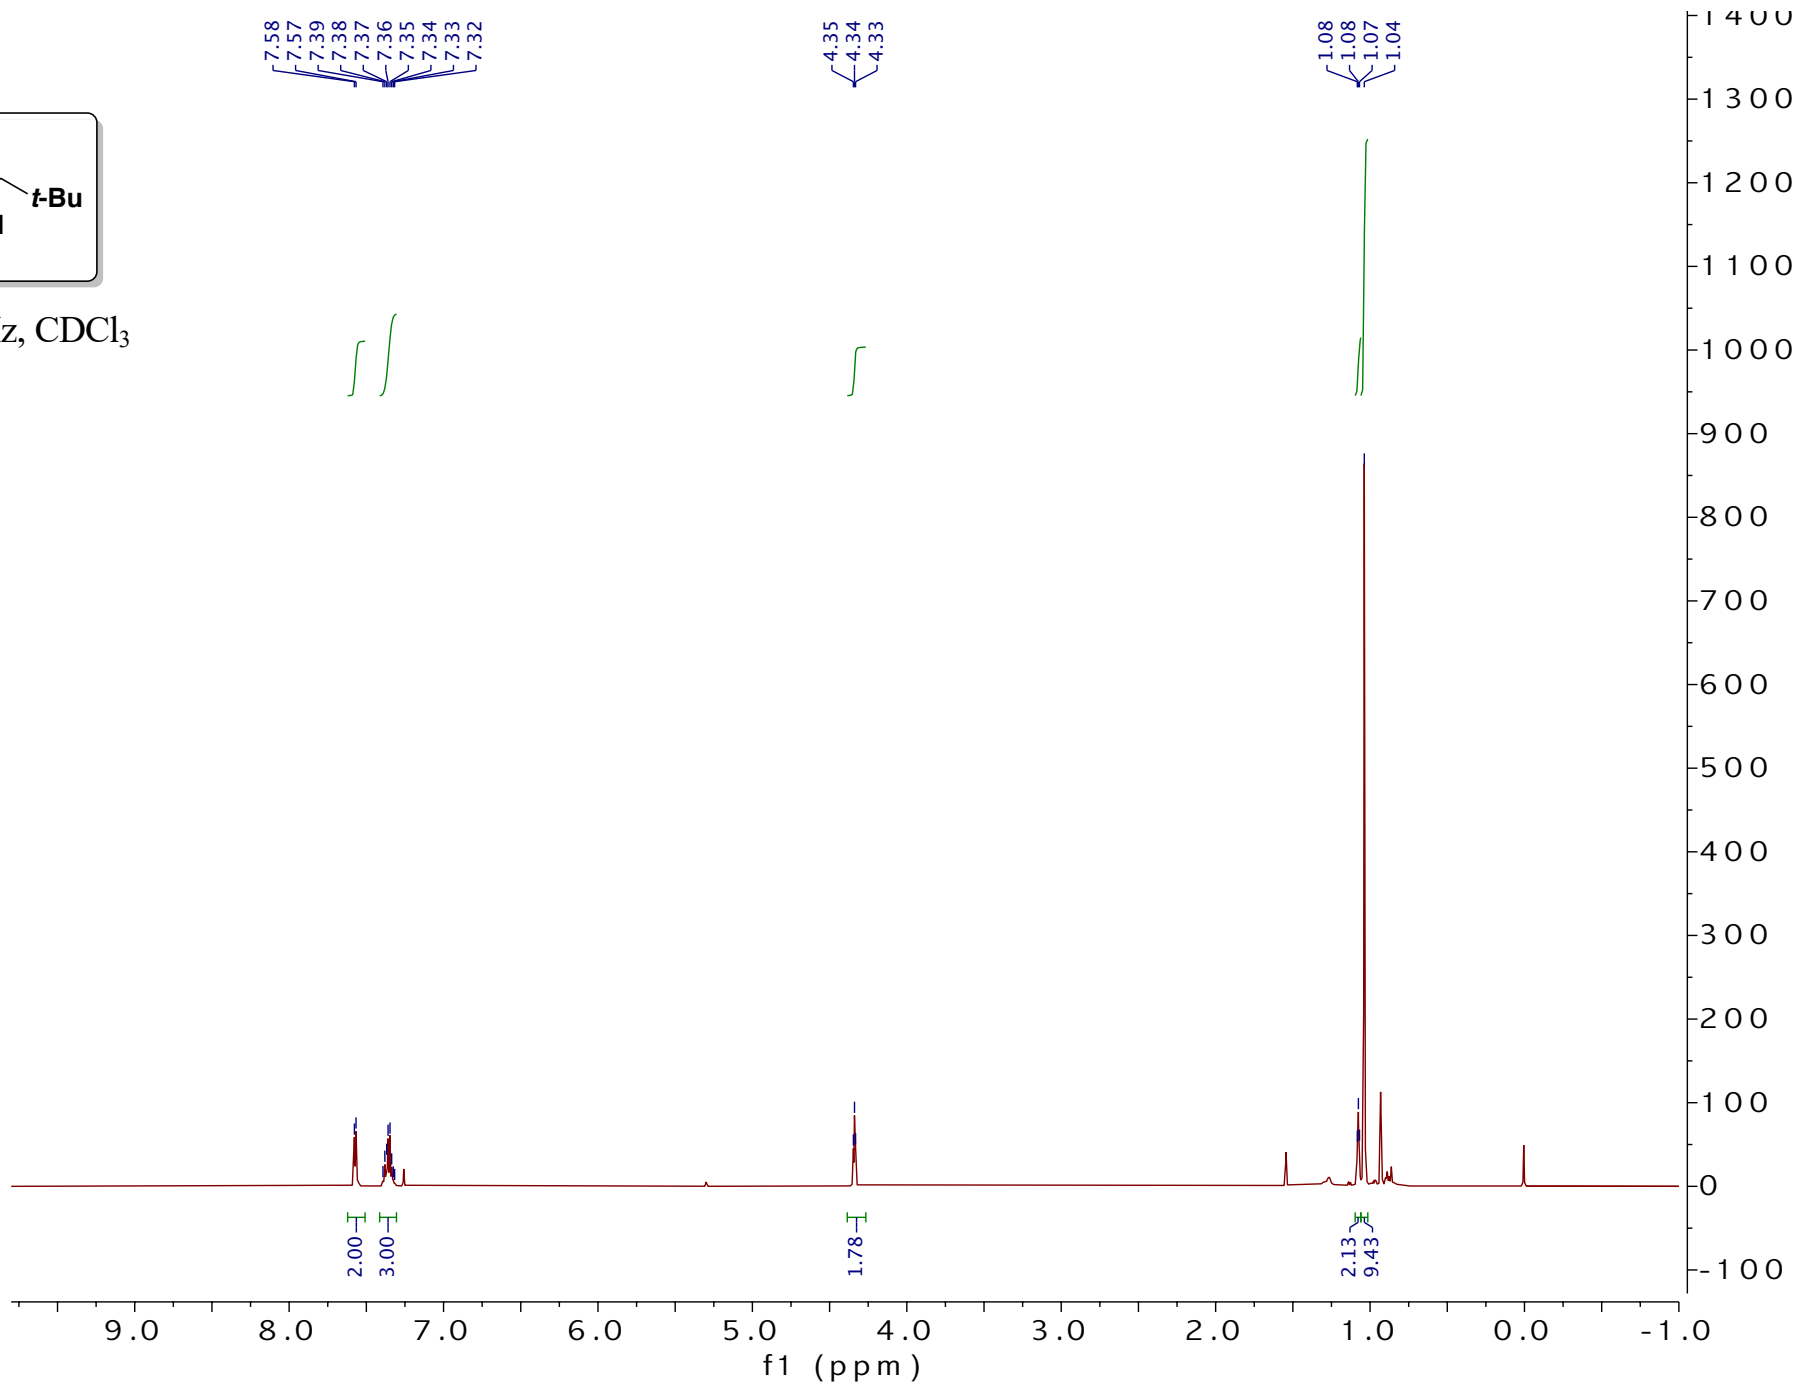

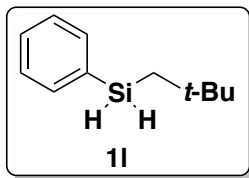

$^{13}\text{C}$ , 151 MHz,  $\text{CDCl}_3$

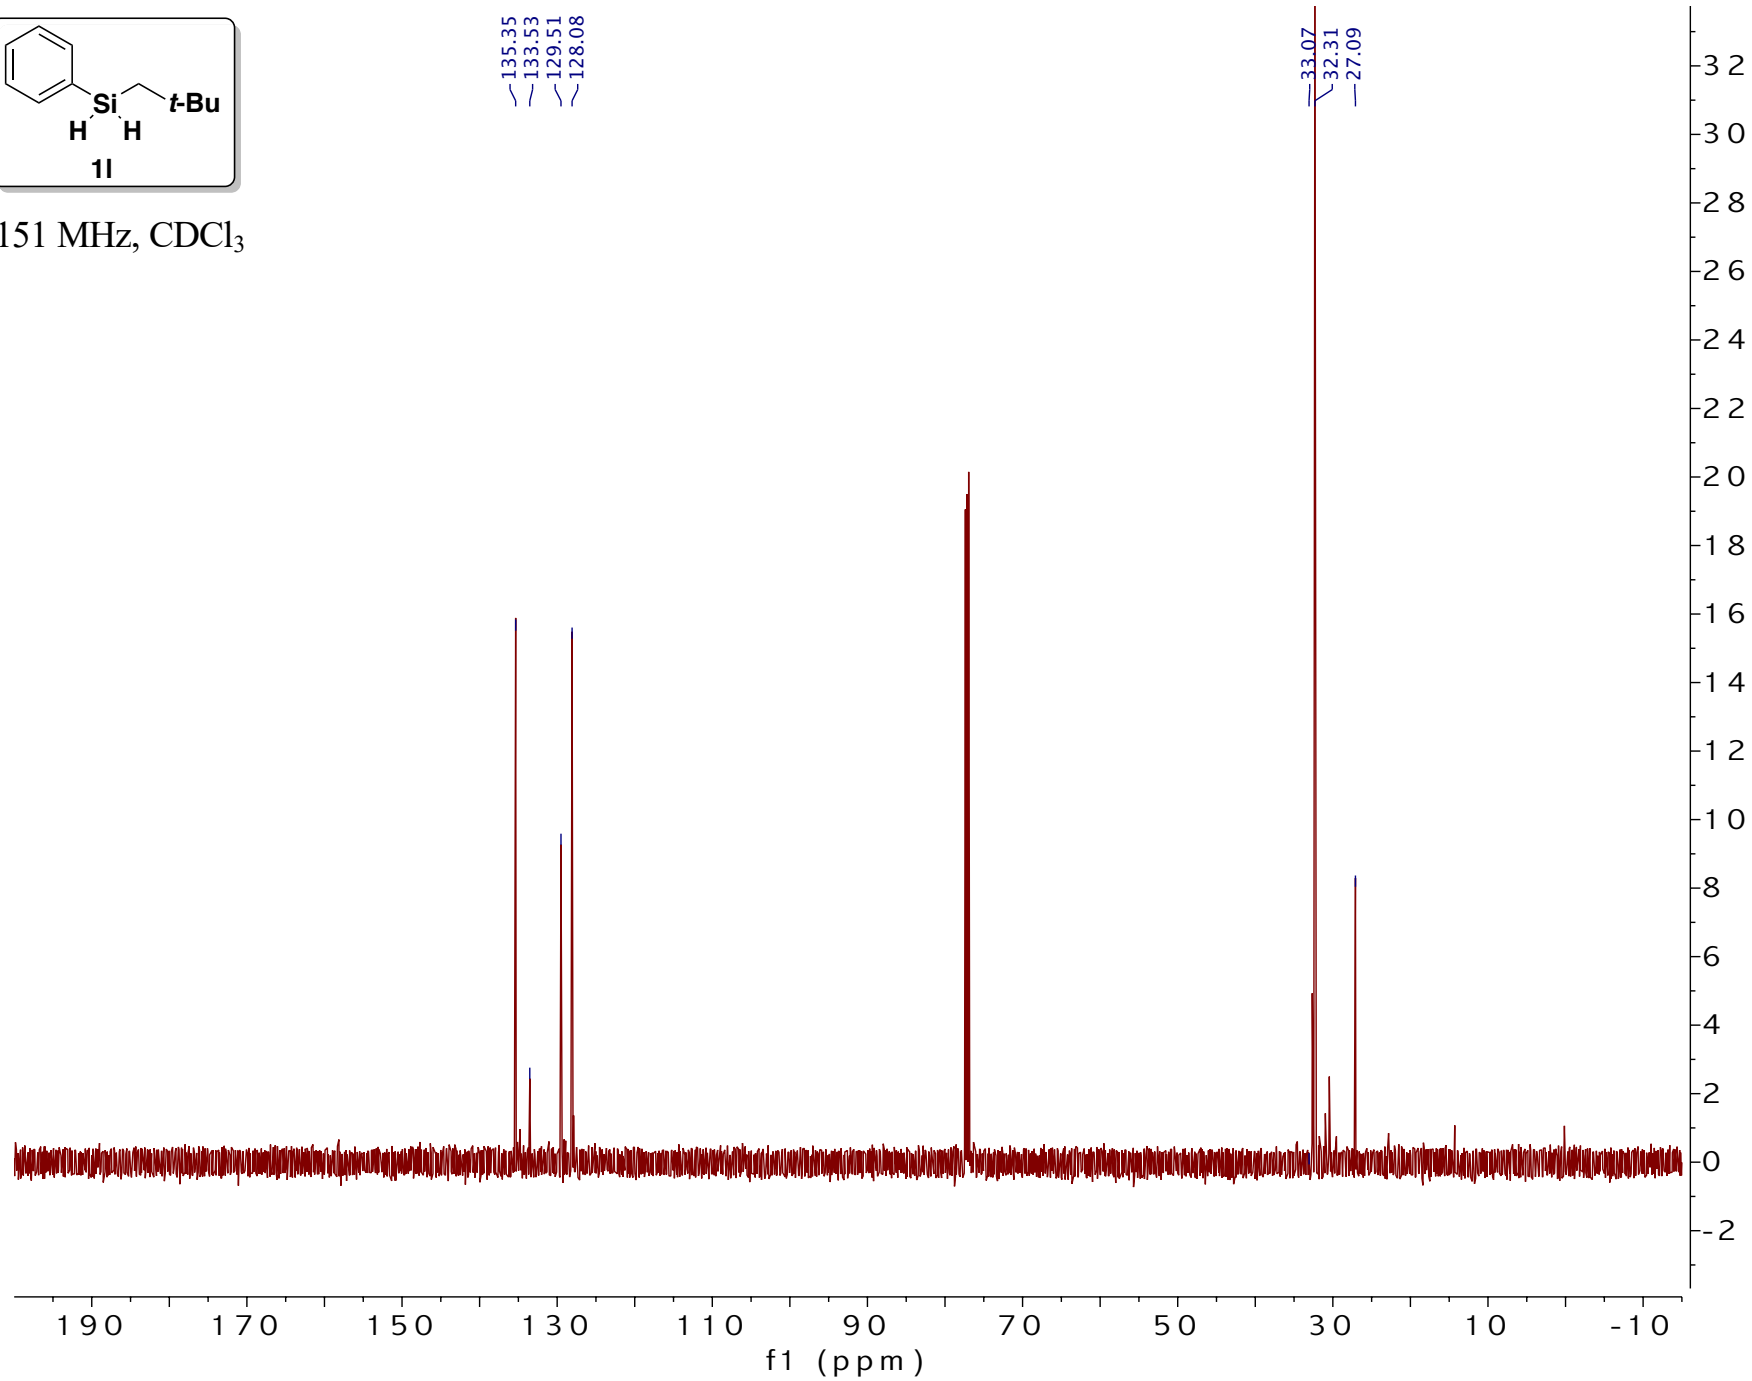

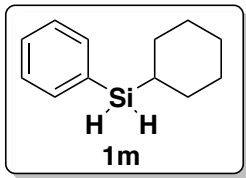

$^1\text{H}$ , 600 MHz,  $\text{CDCl}_3$

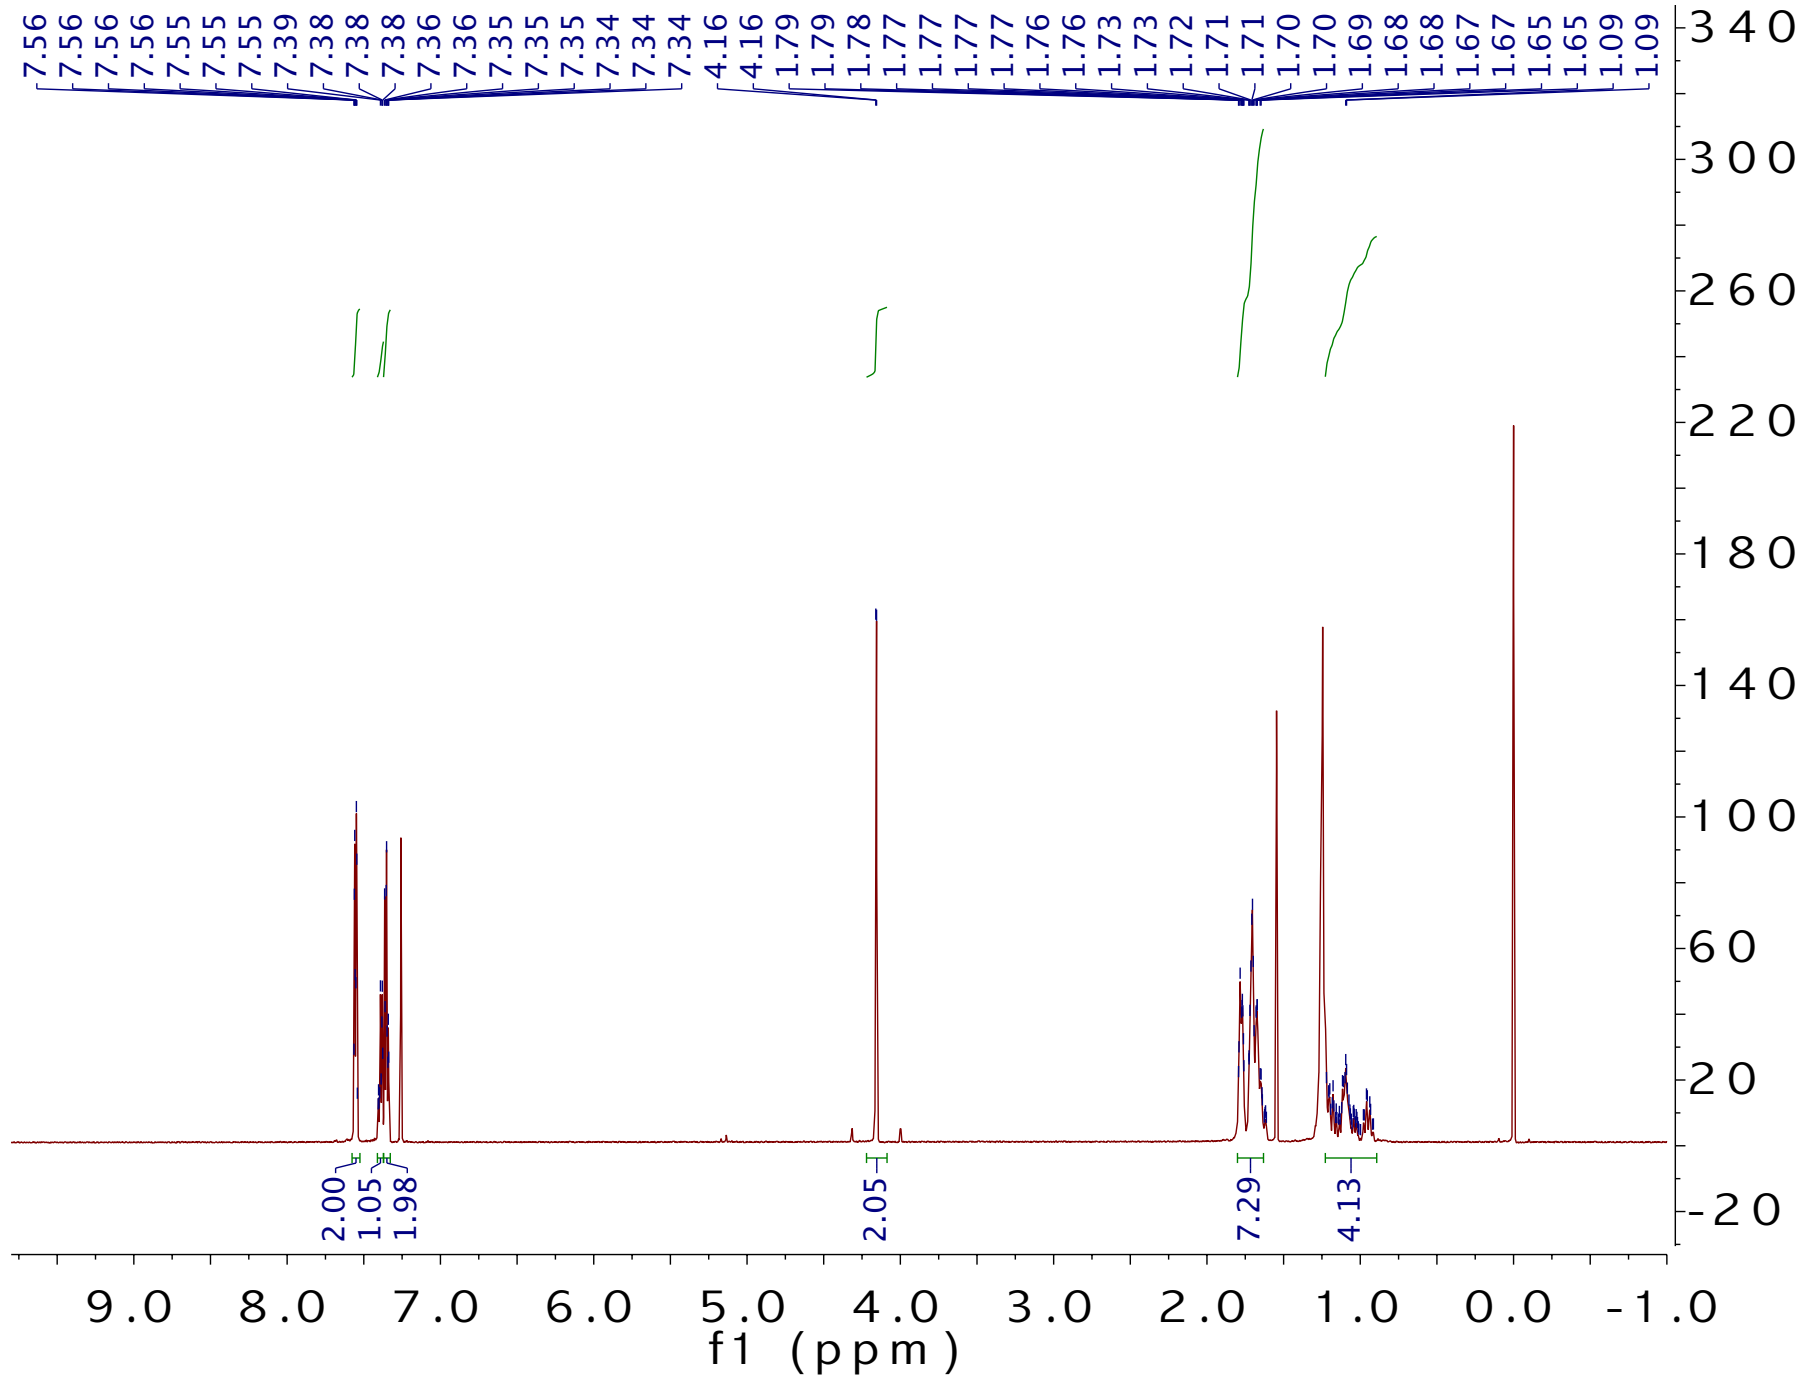



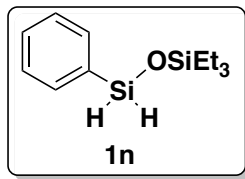

$^1\text{H}$ , 400 MHz,  $\text{CDCl}_3$

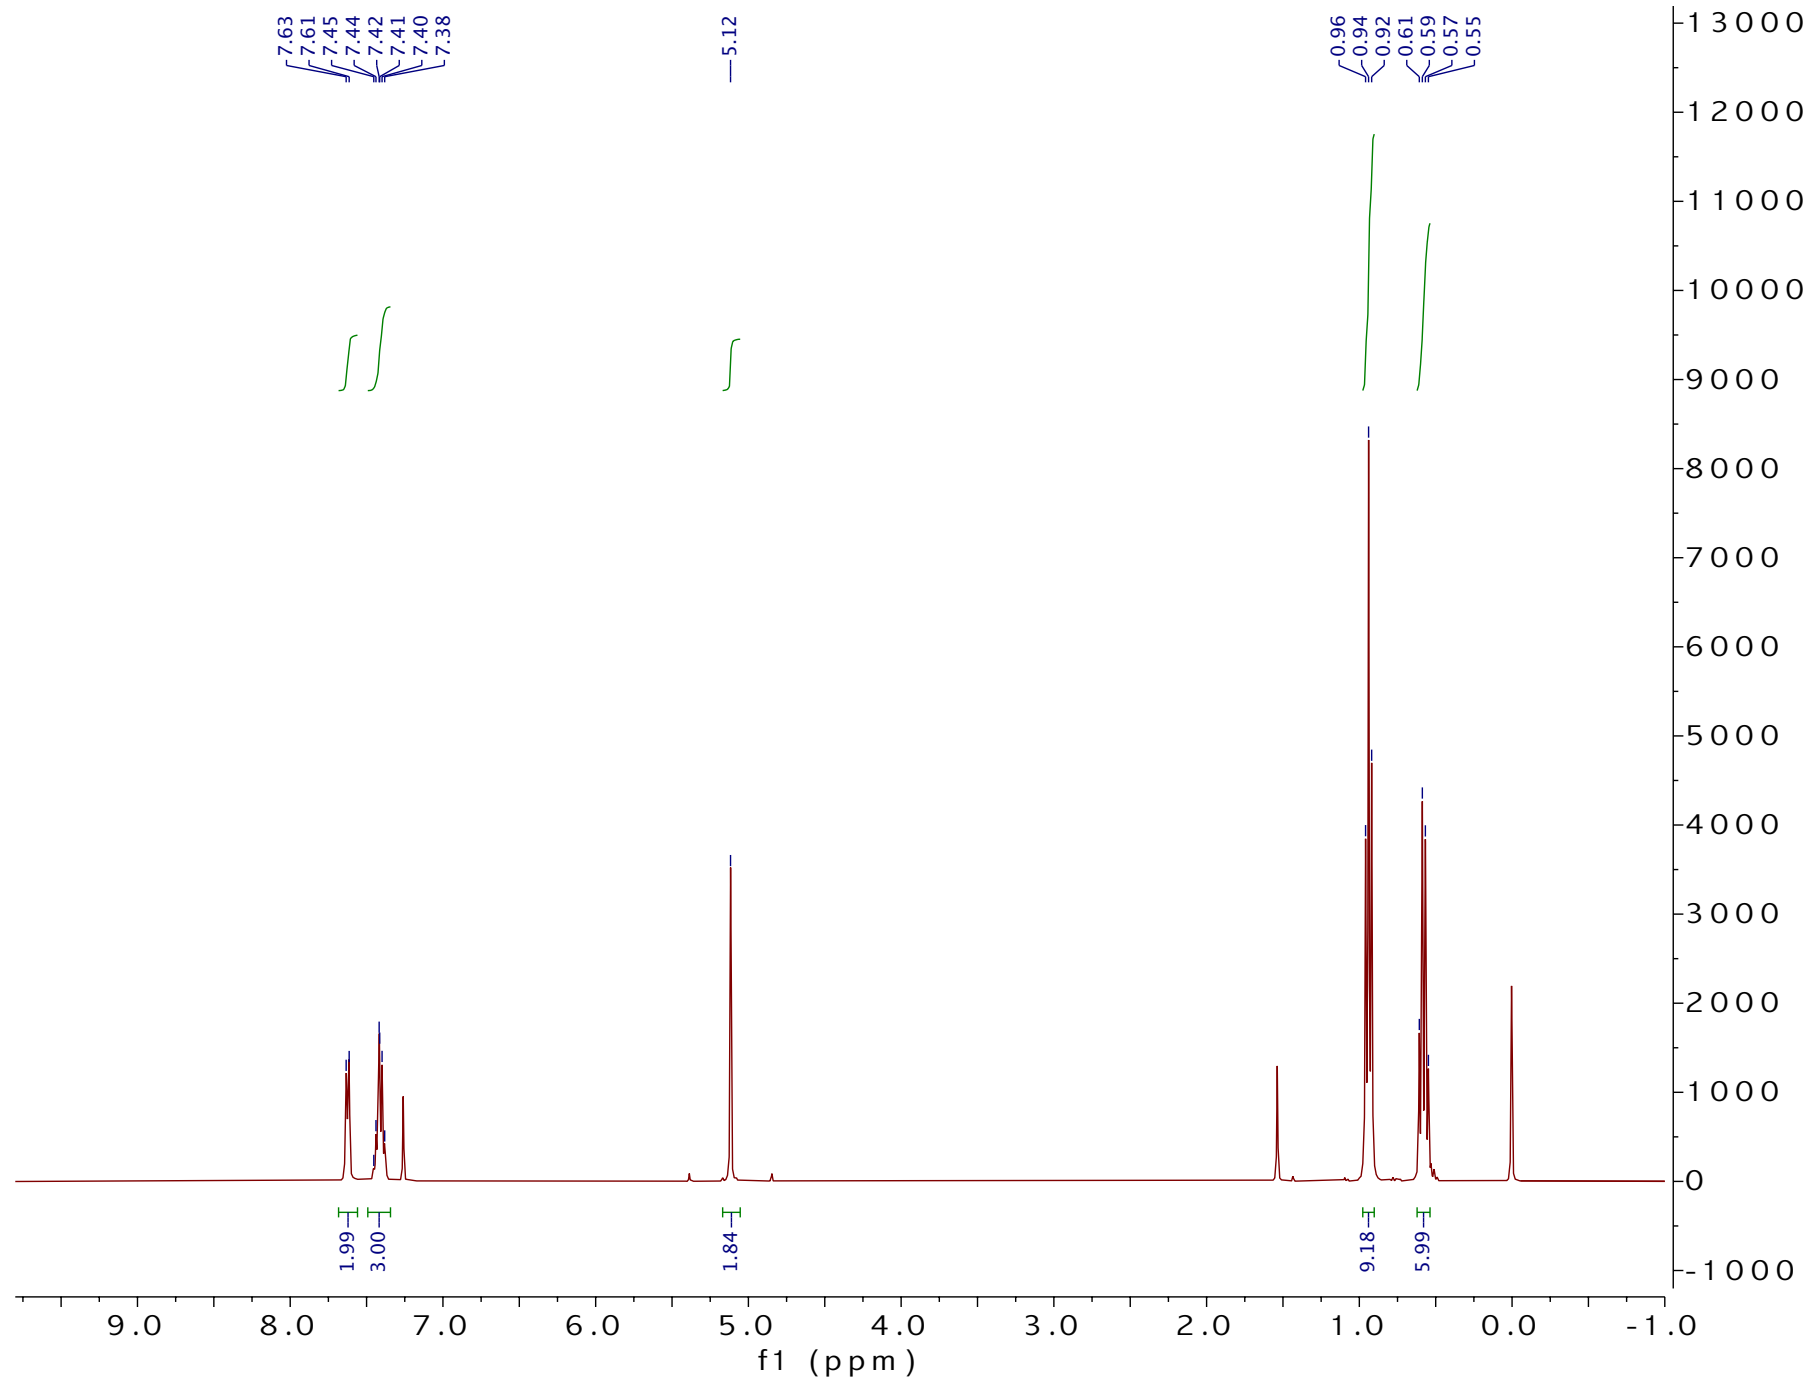

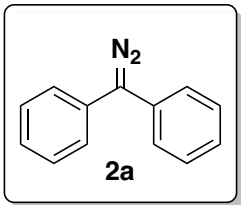

$^1\text{H}$ , 400 MHz,  $\text{CDCl}_3$

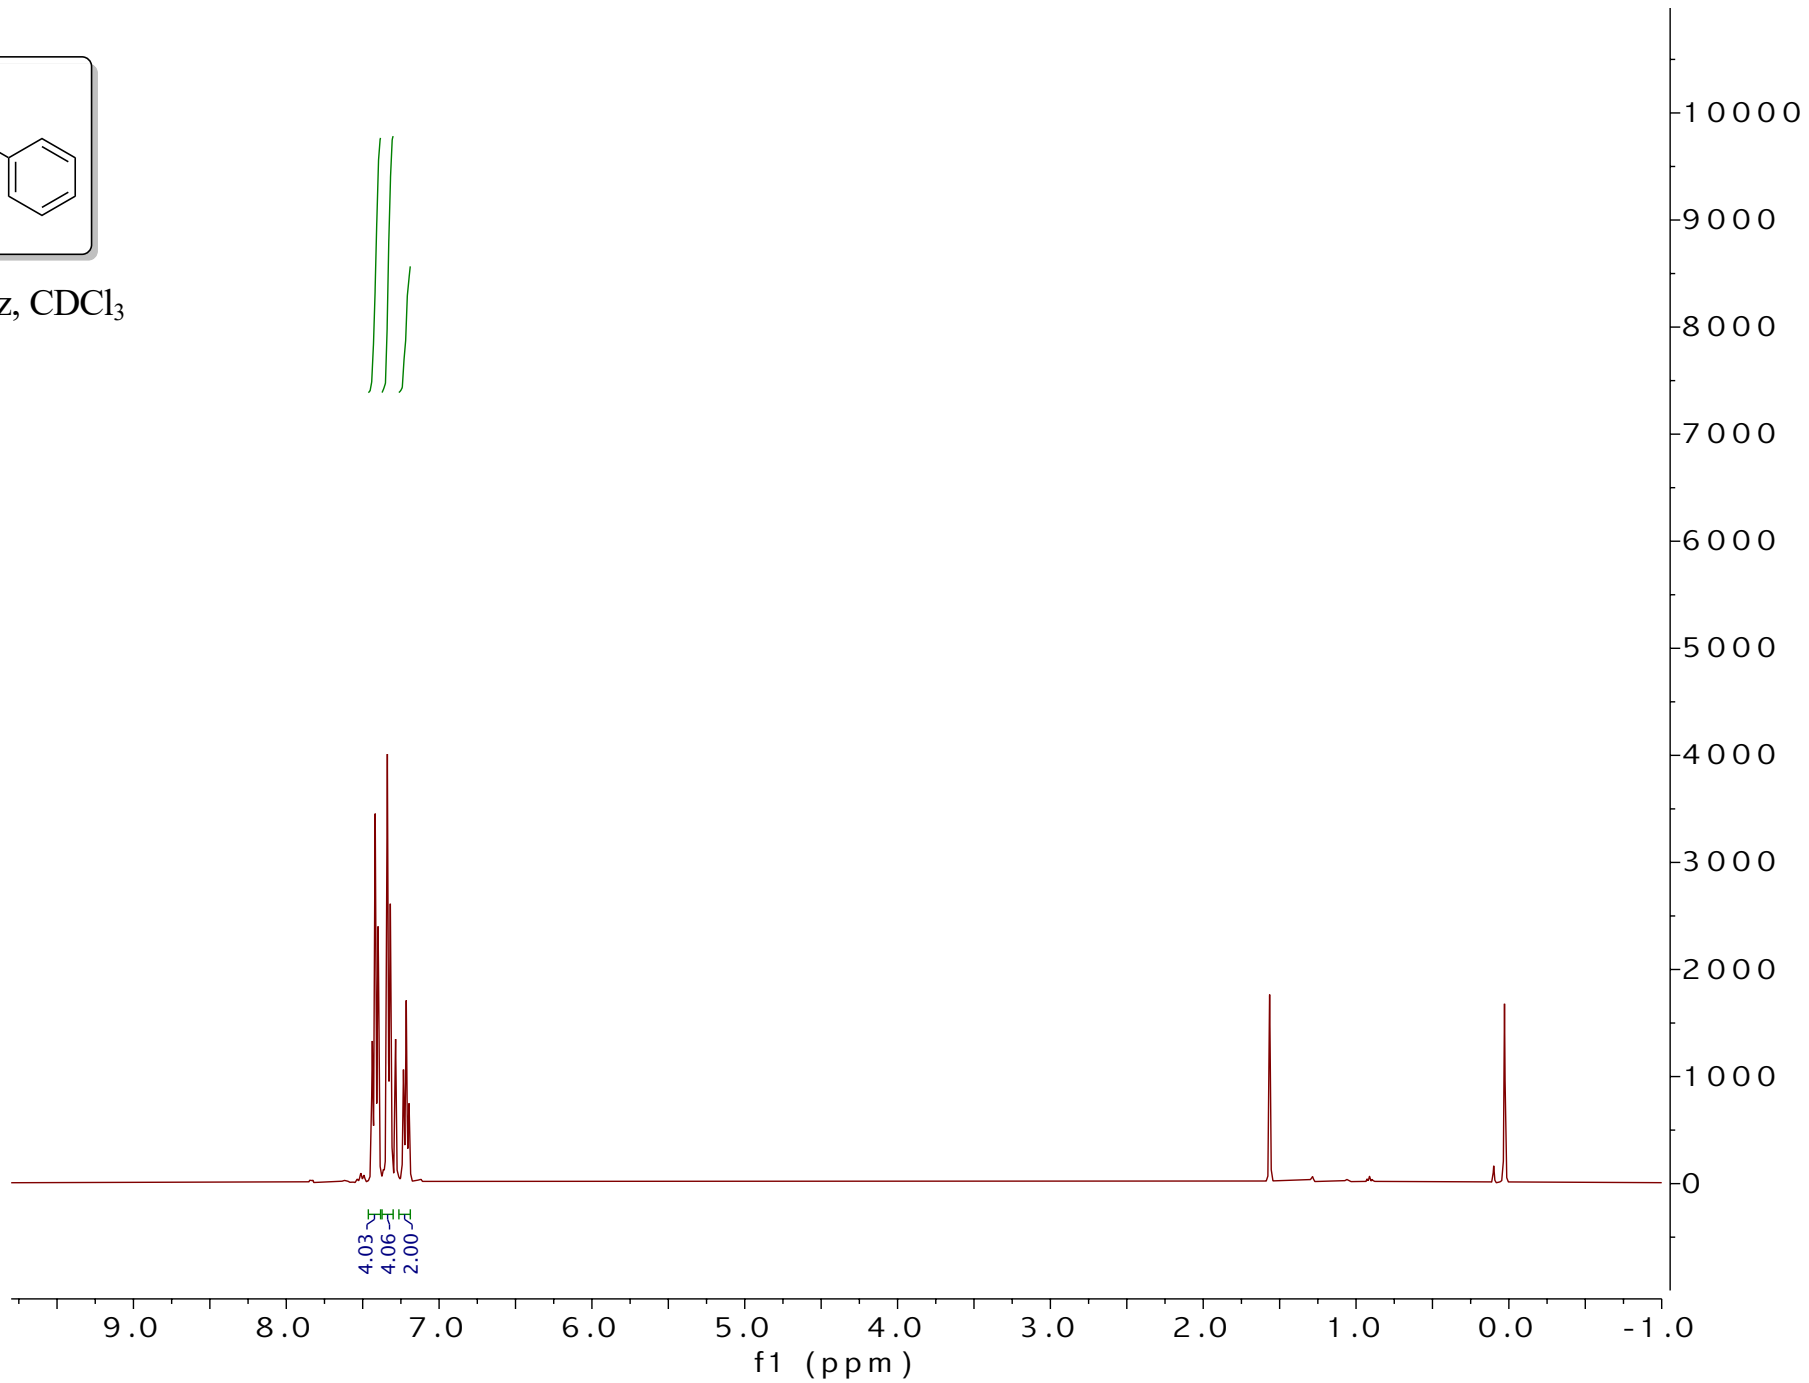

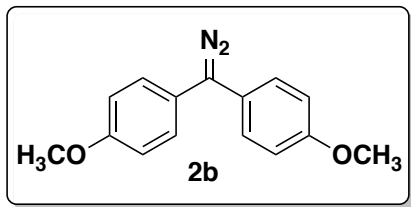

$^1\text{H}$ , 600 MHz,  $\text{CDCl}_3$

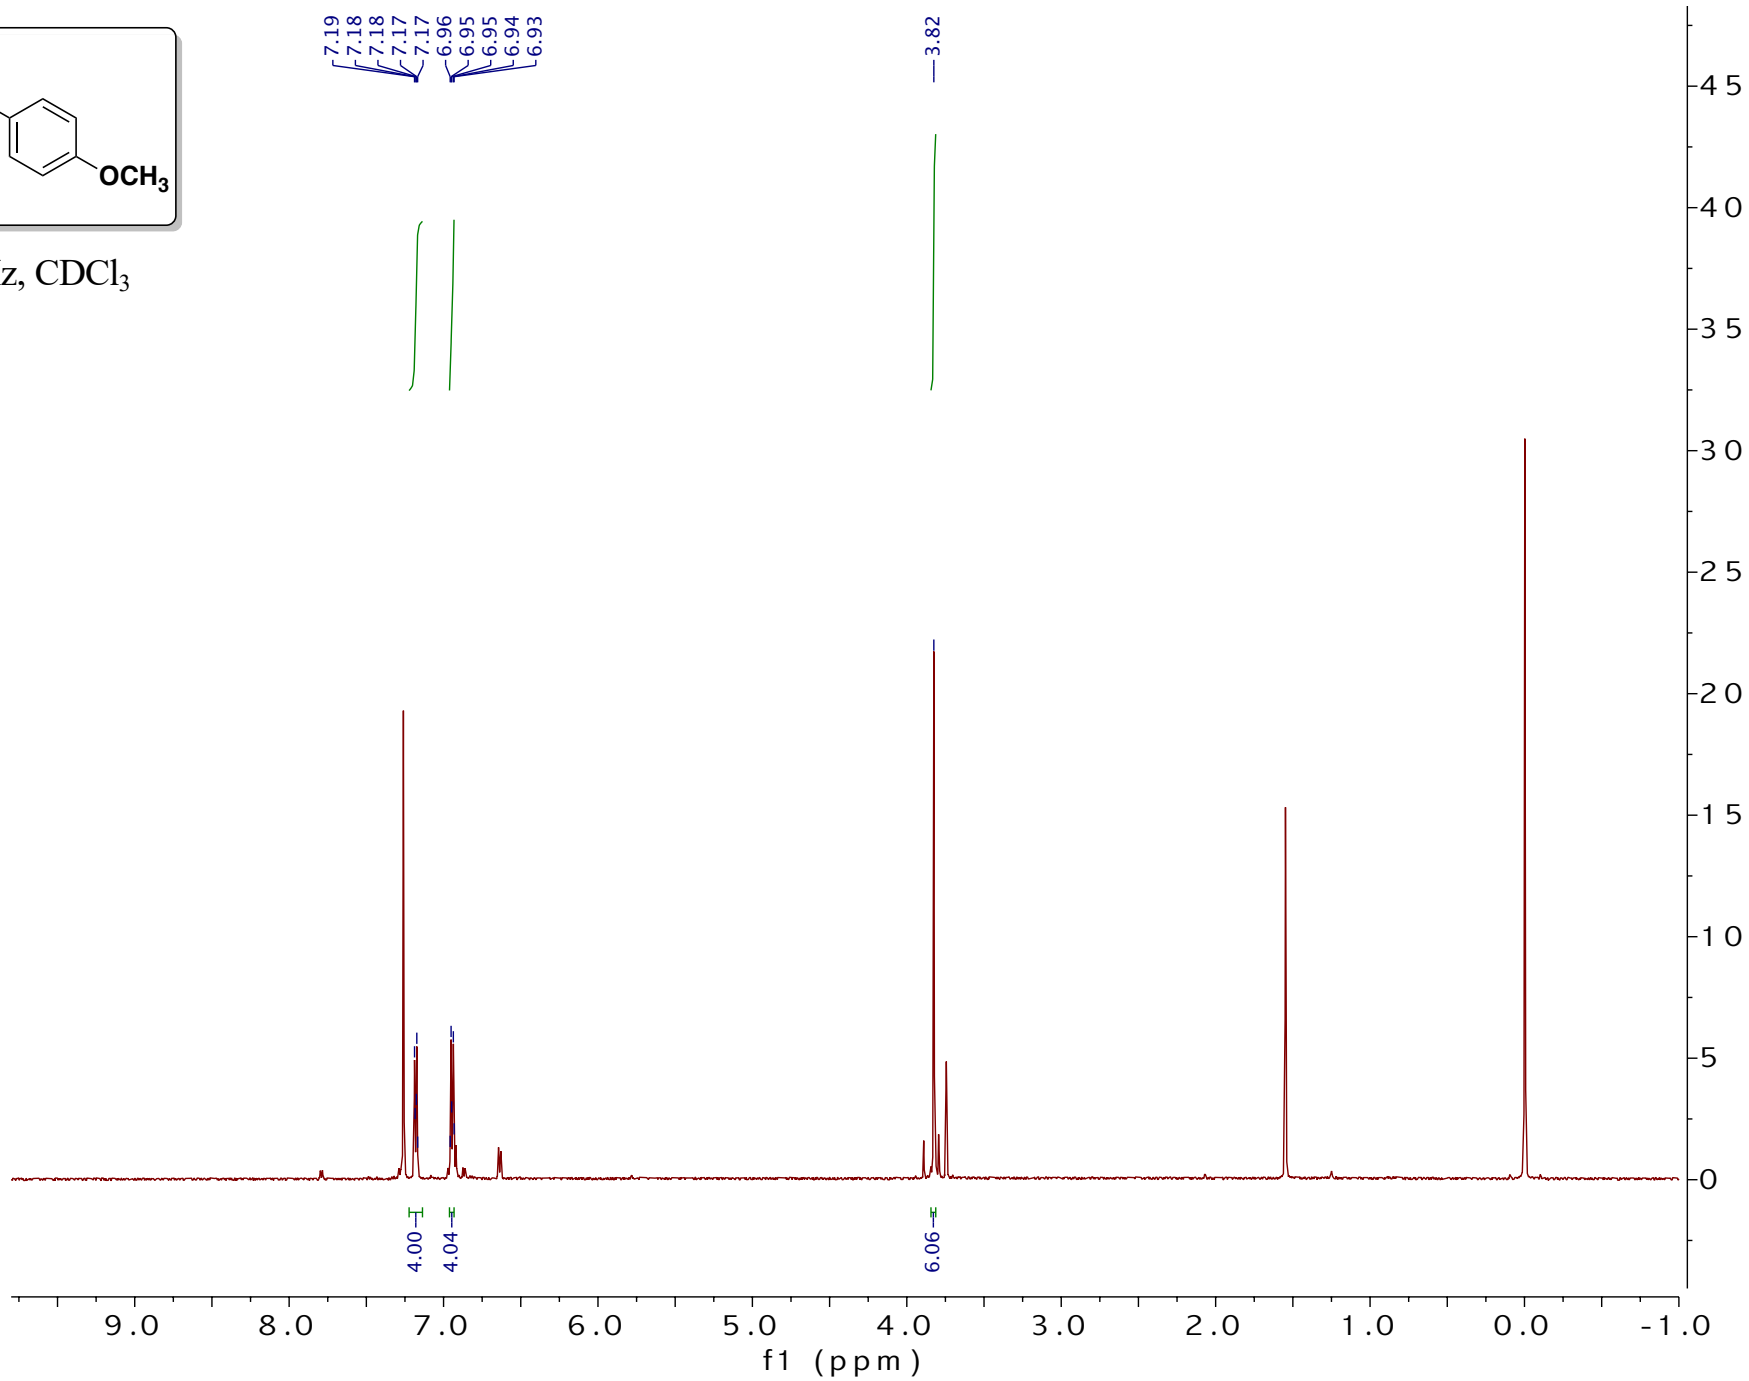

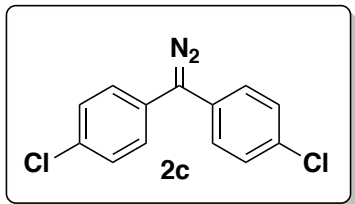

$^1\text{H}$ , 600 MHz,  $\text{CDCl}_3$

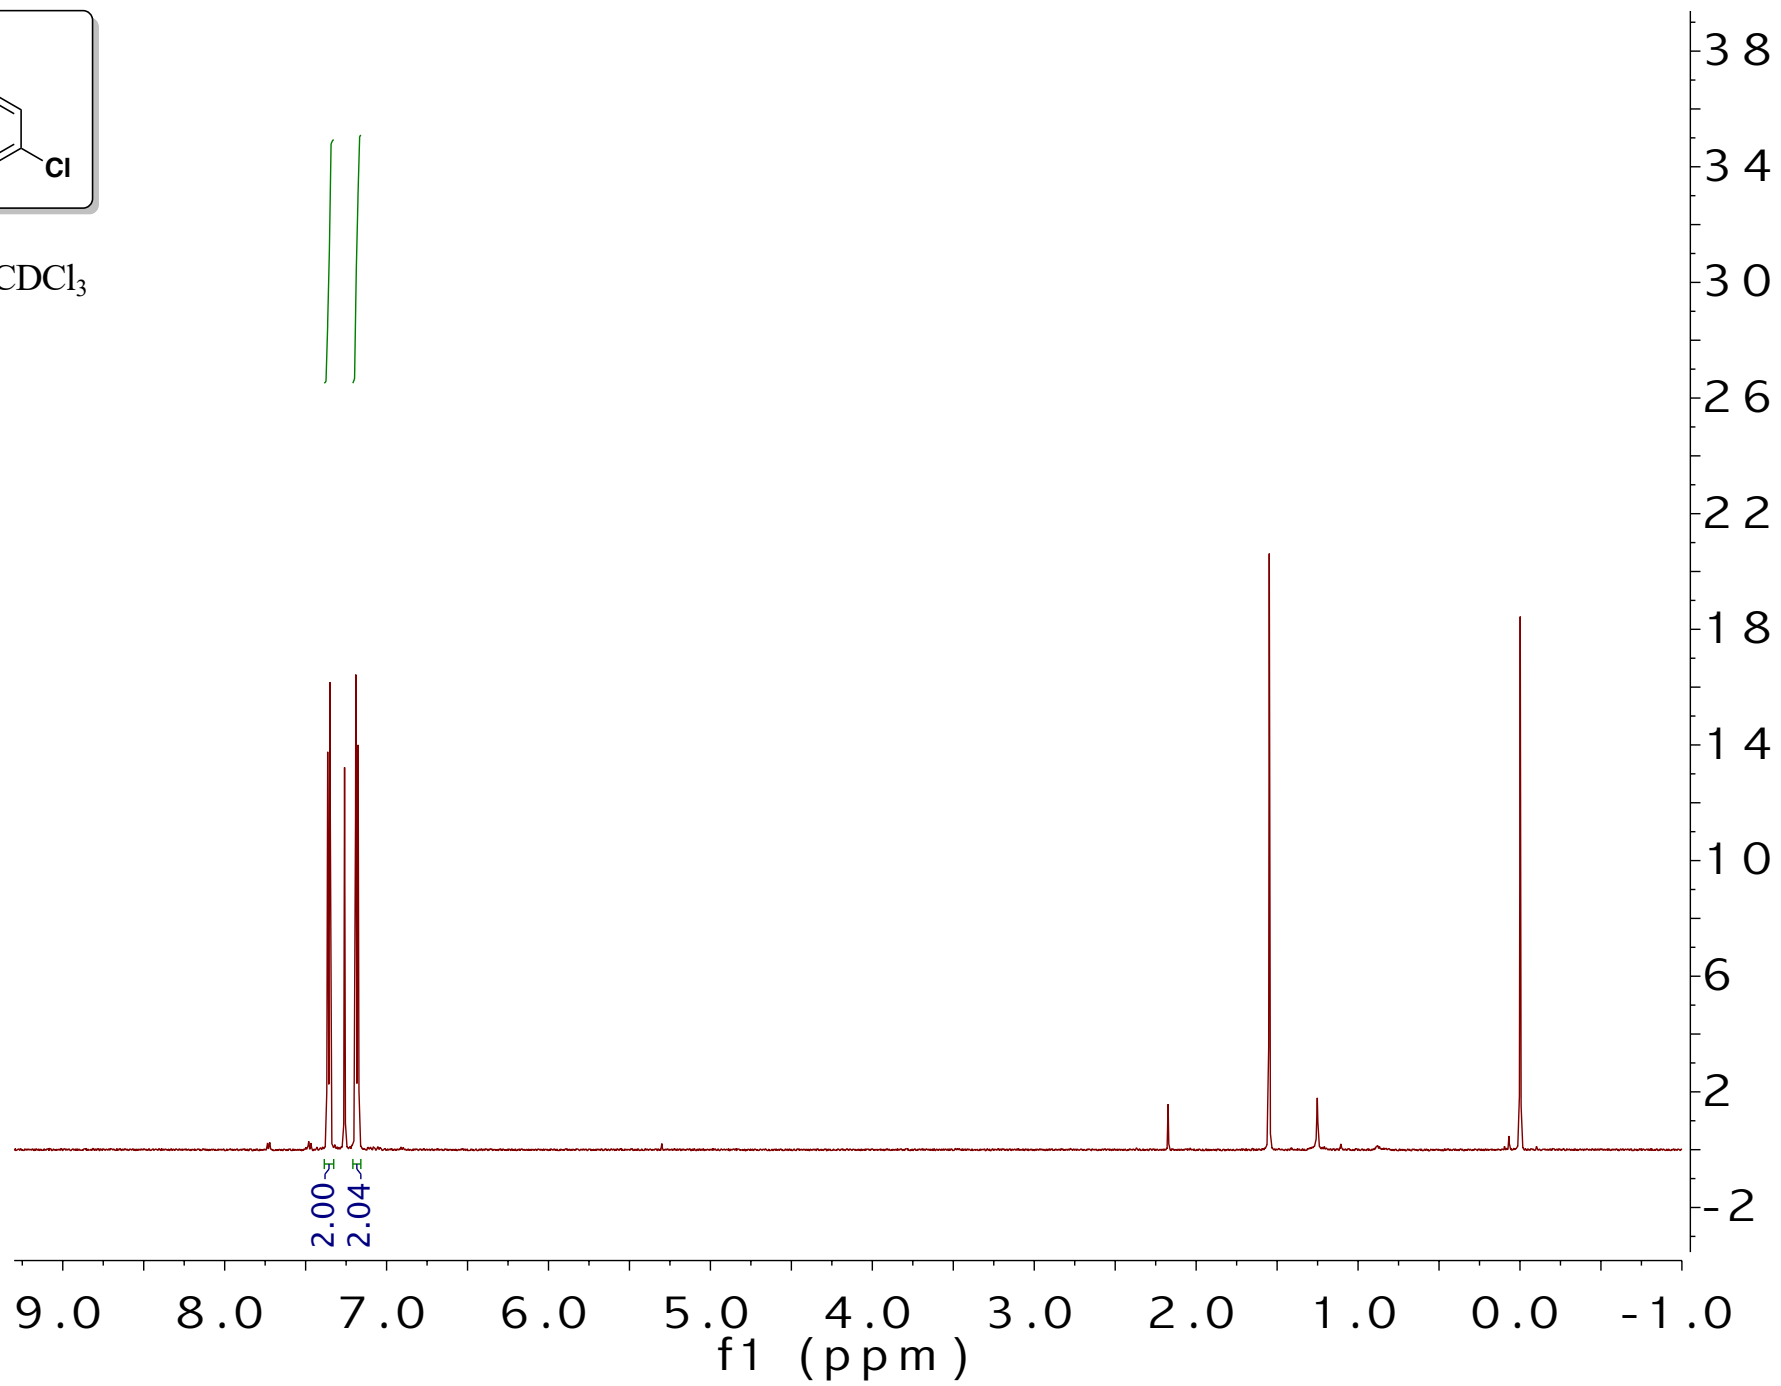

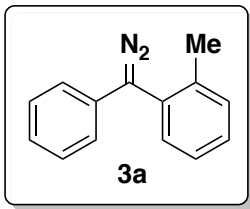

$^1\text{H}$ , 600 MHz,  $\text{CDCl}_3$

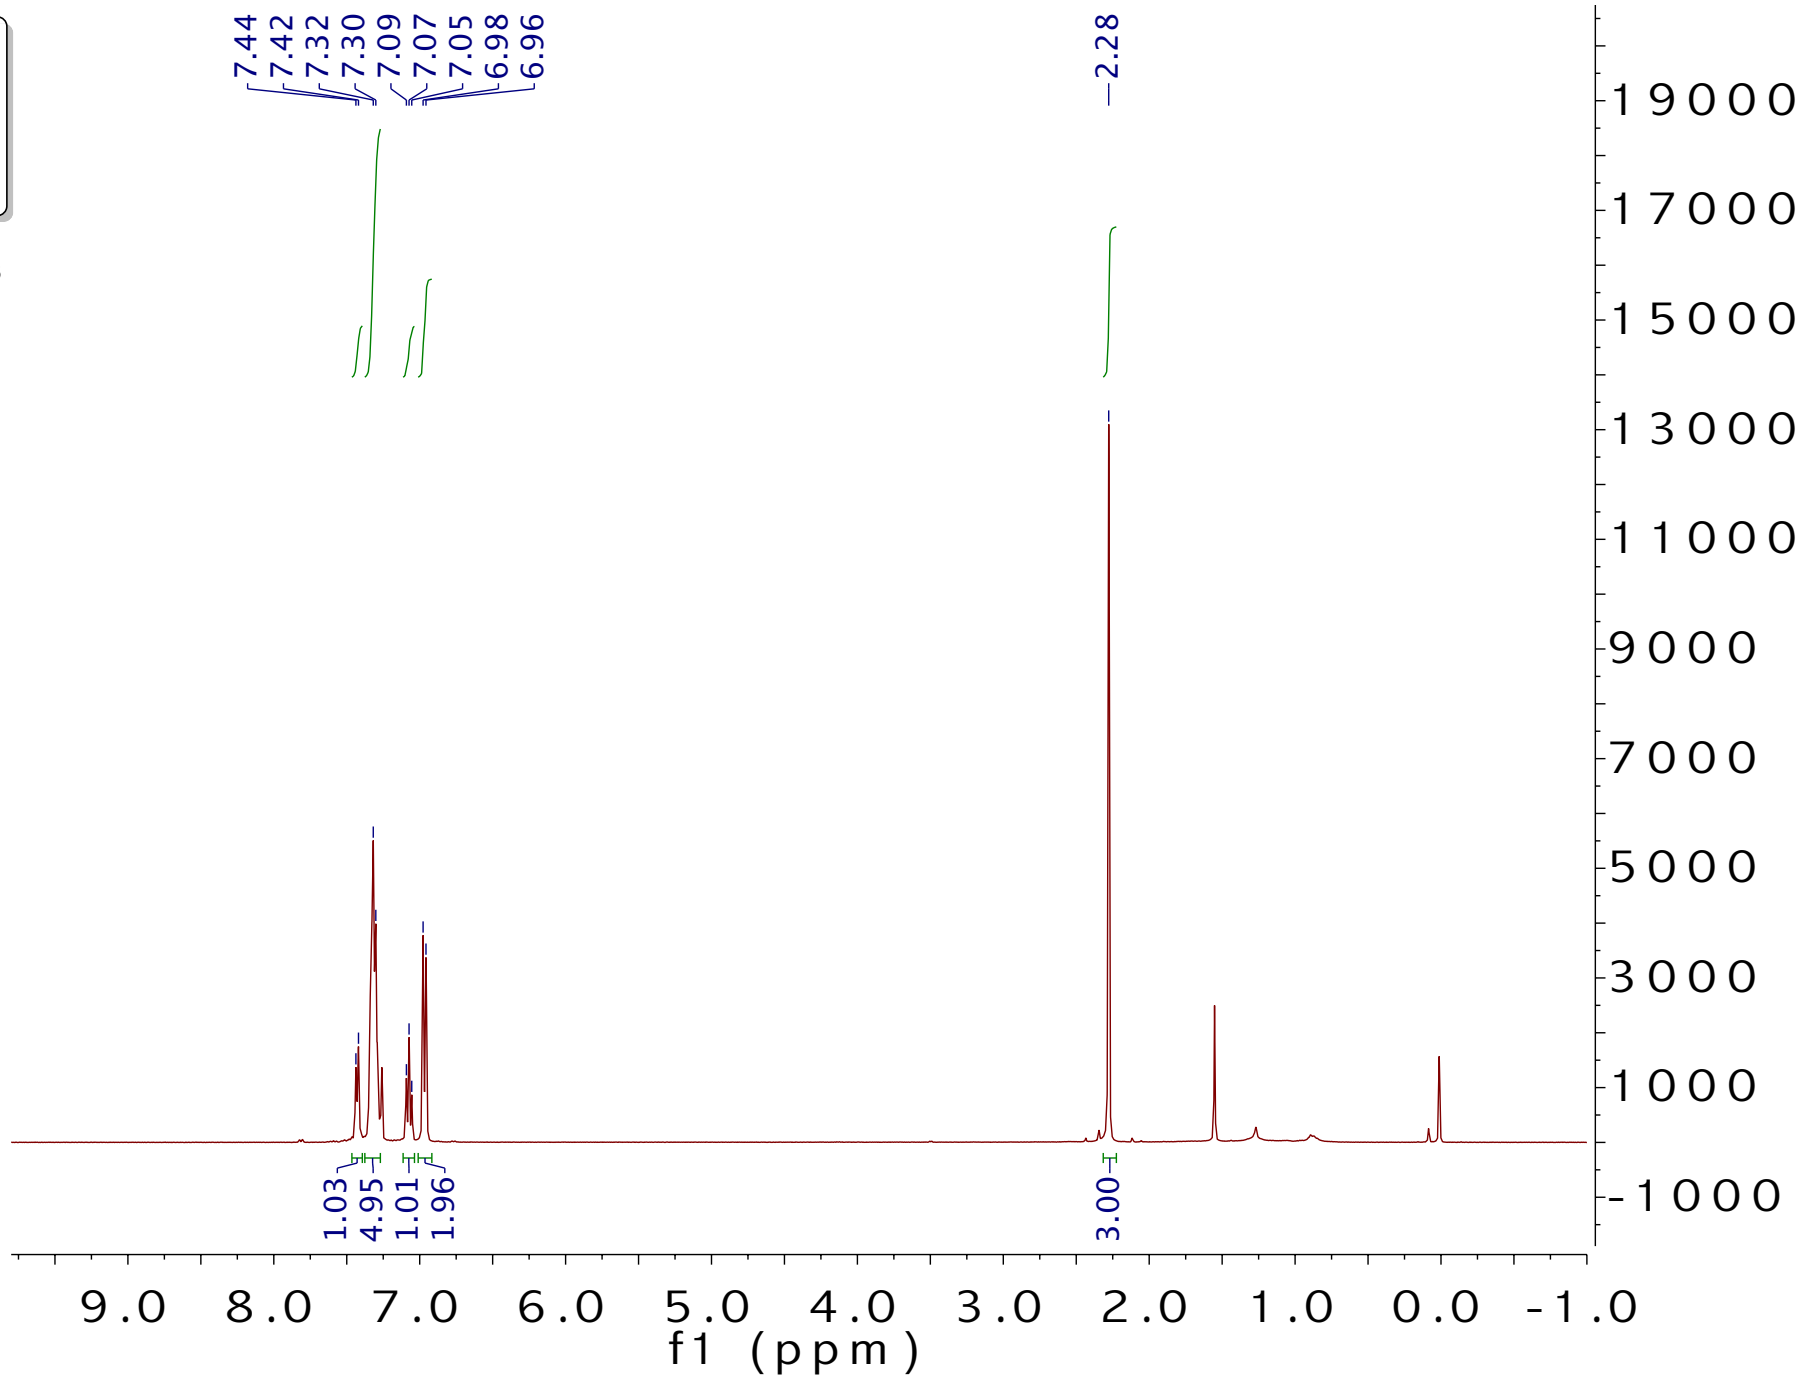

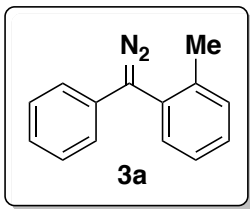

$^{13}\text{C}$ , 151 MHz,  $\text{CDCl}_3$

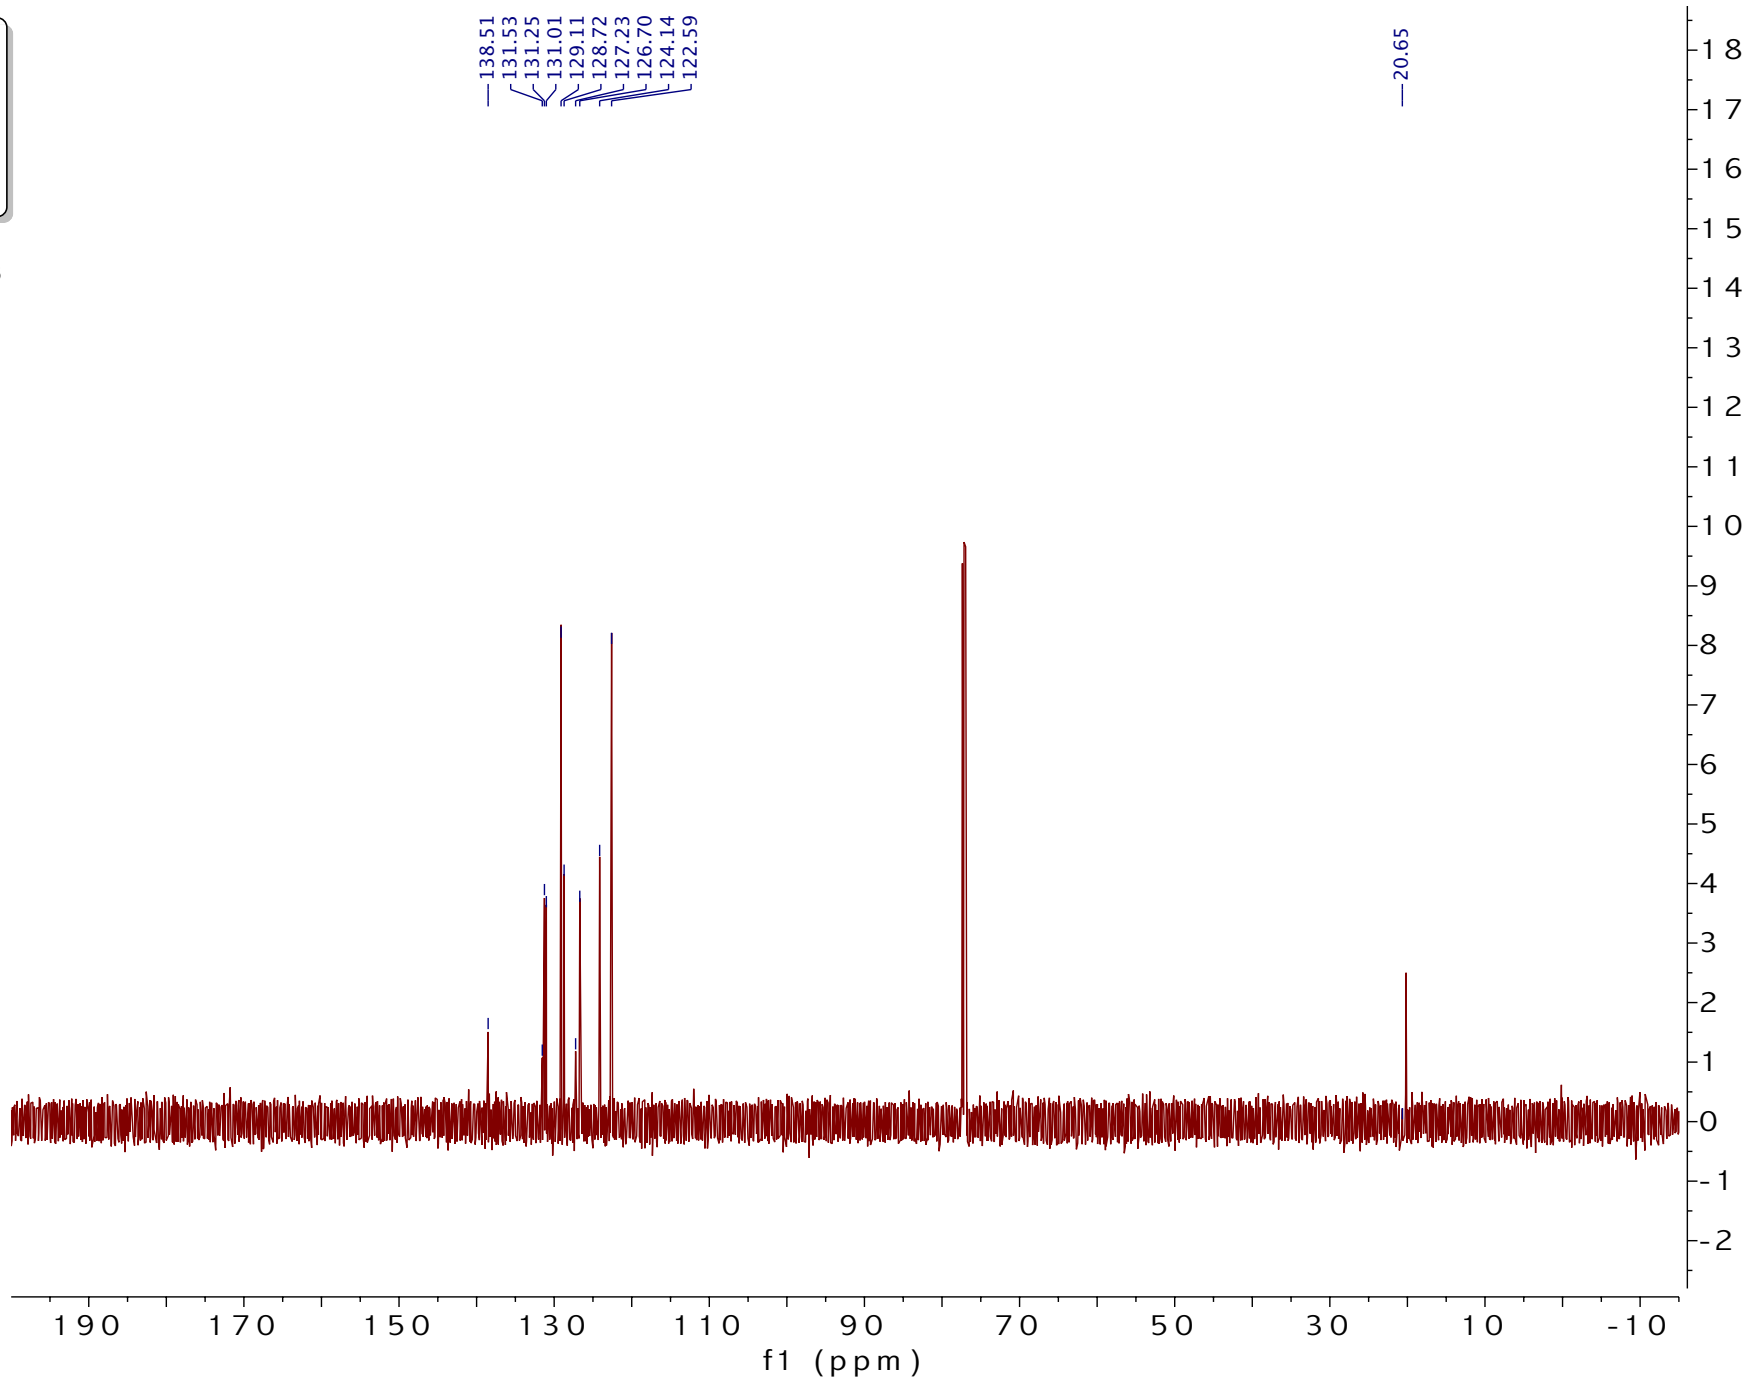

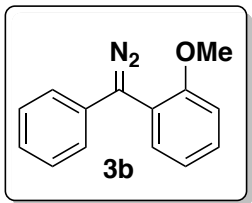

$^1\text{H}$ , 600 MHz,  $\text{CDCl}_3$

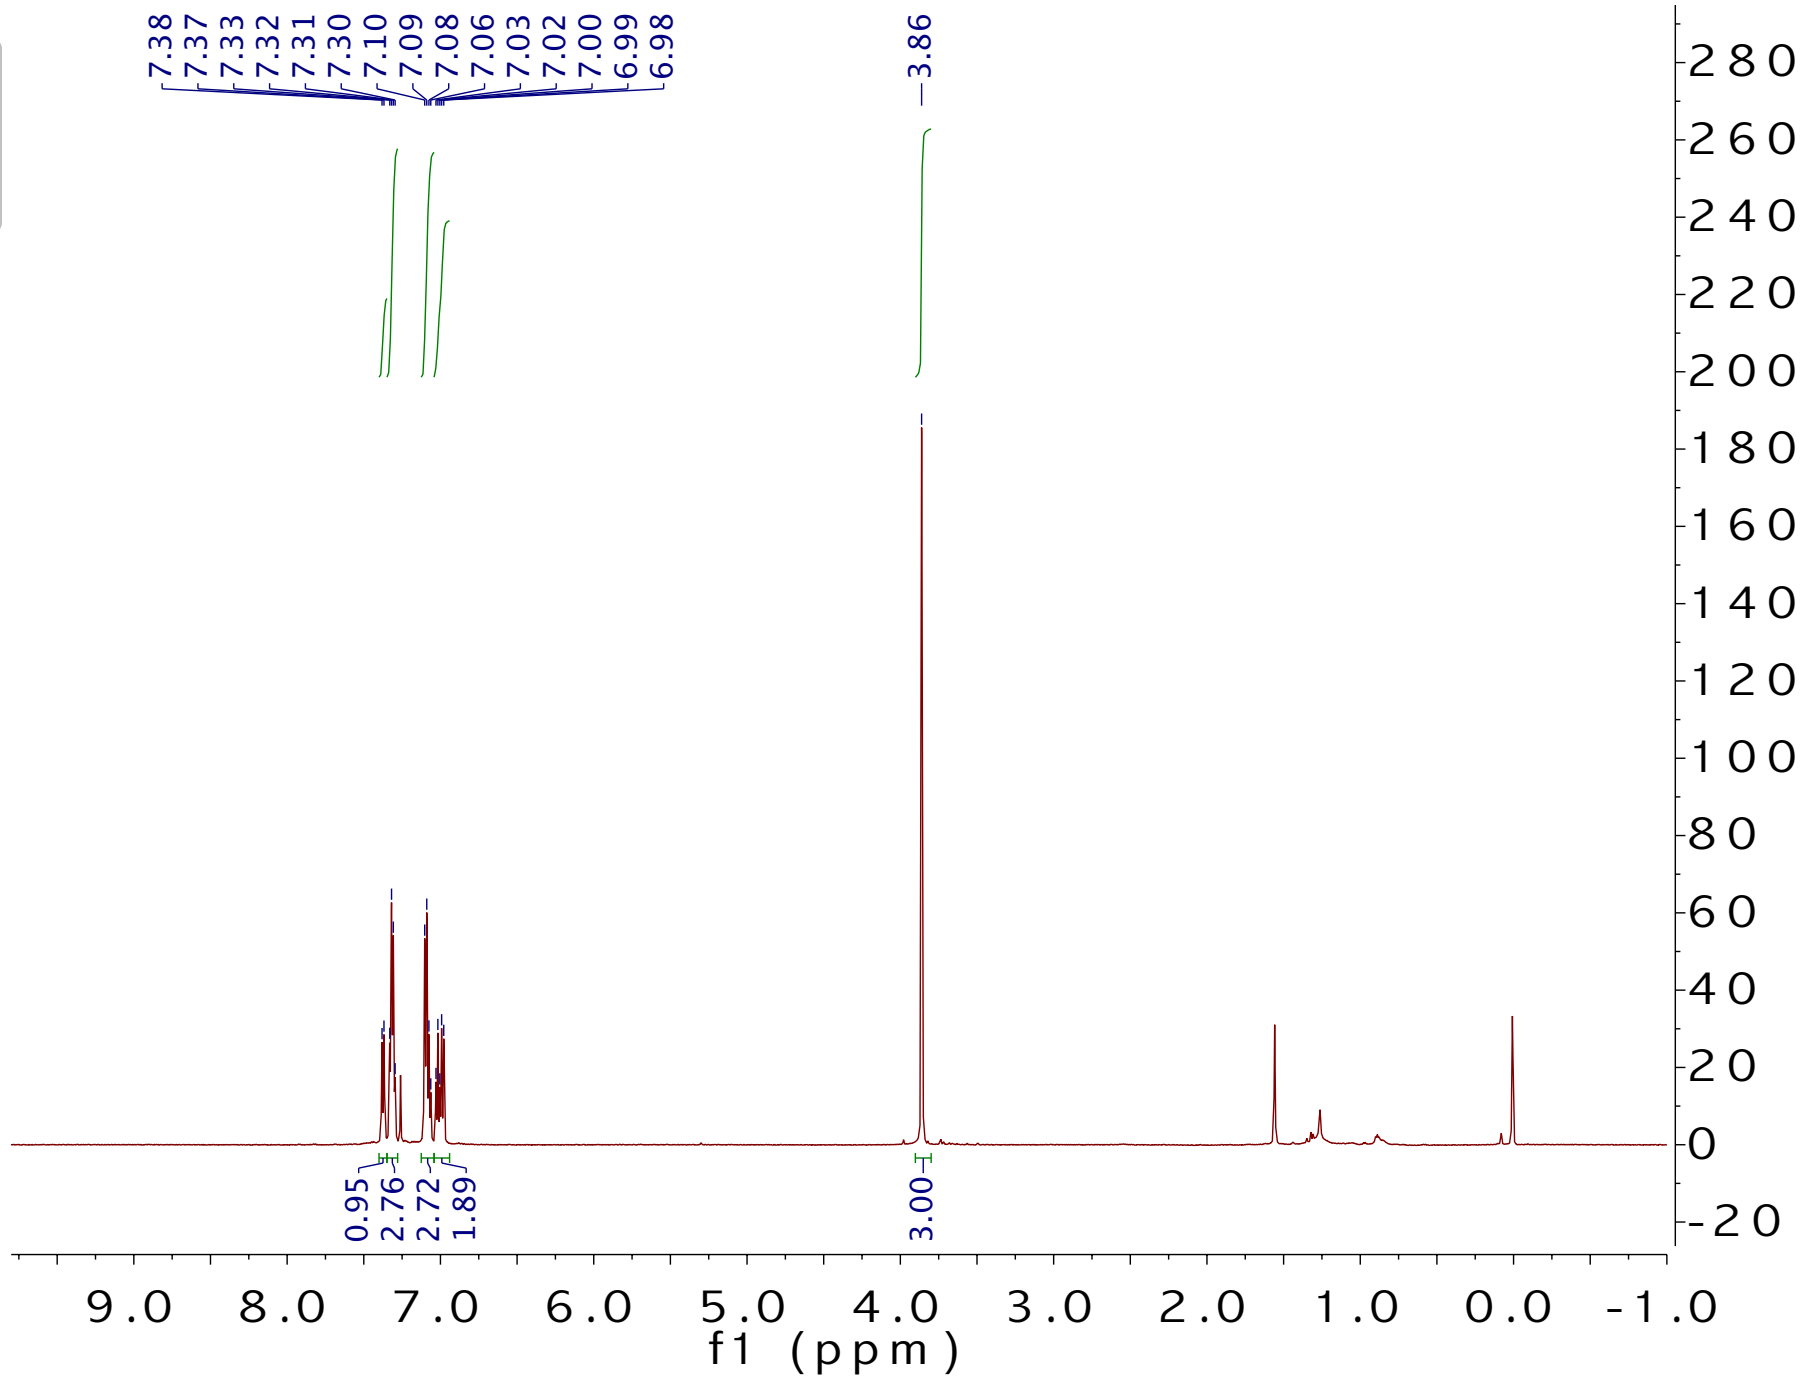

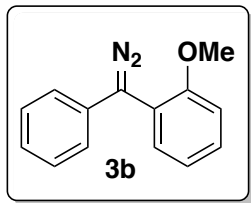

$^{13}\text{C}$ , 100 MHz,  $\text{CDCl}_3$

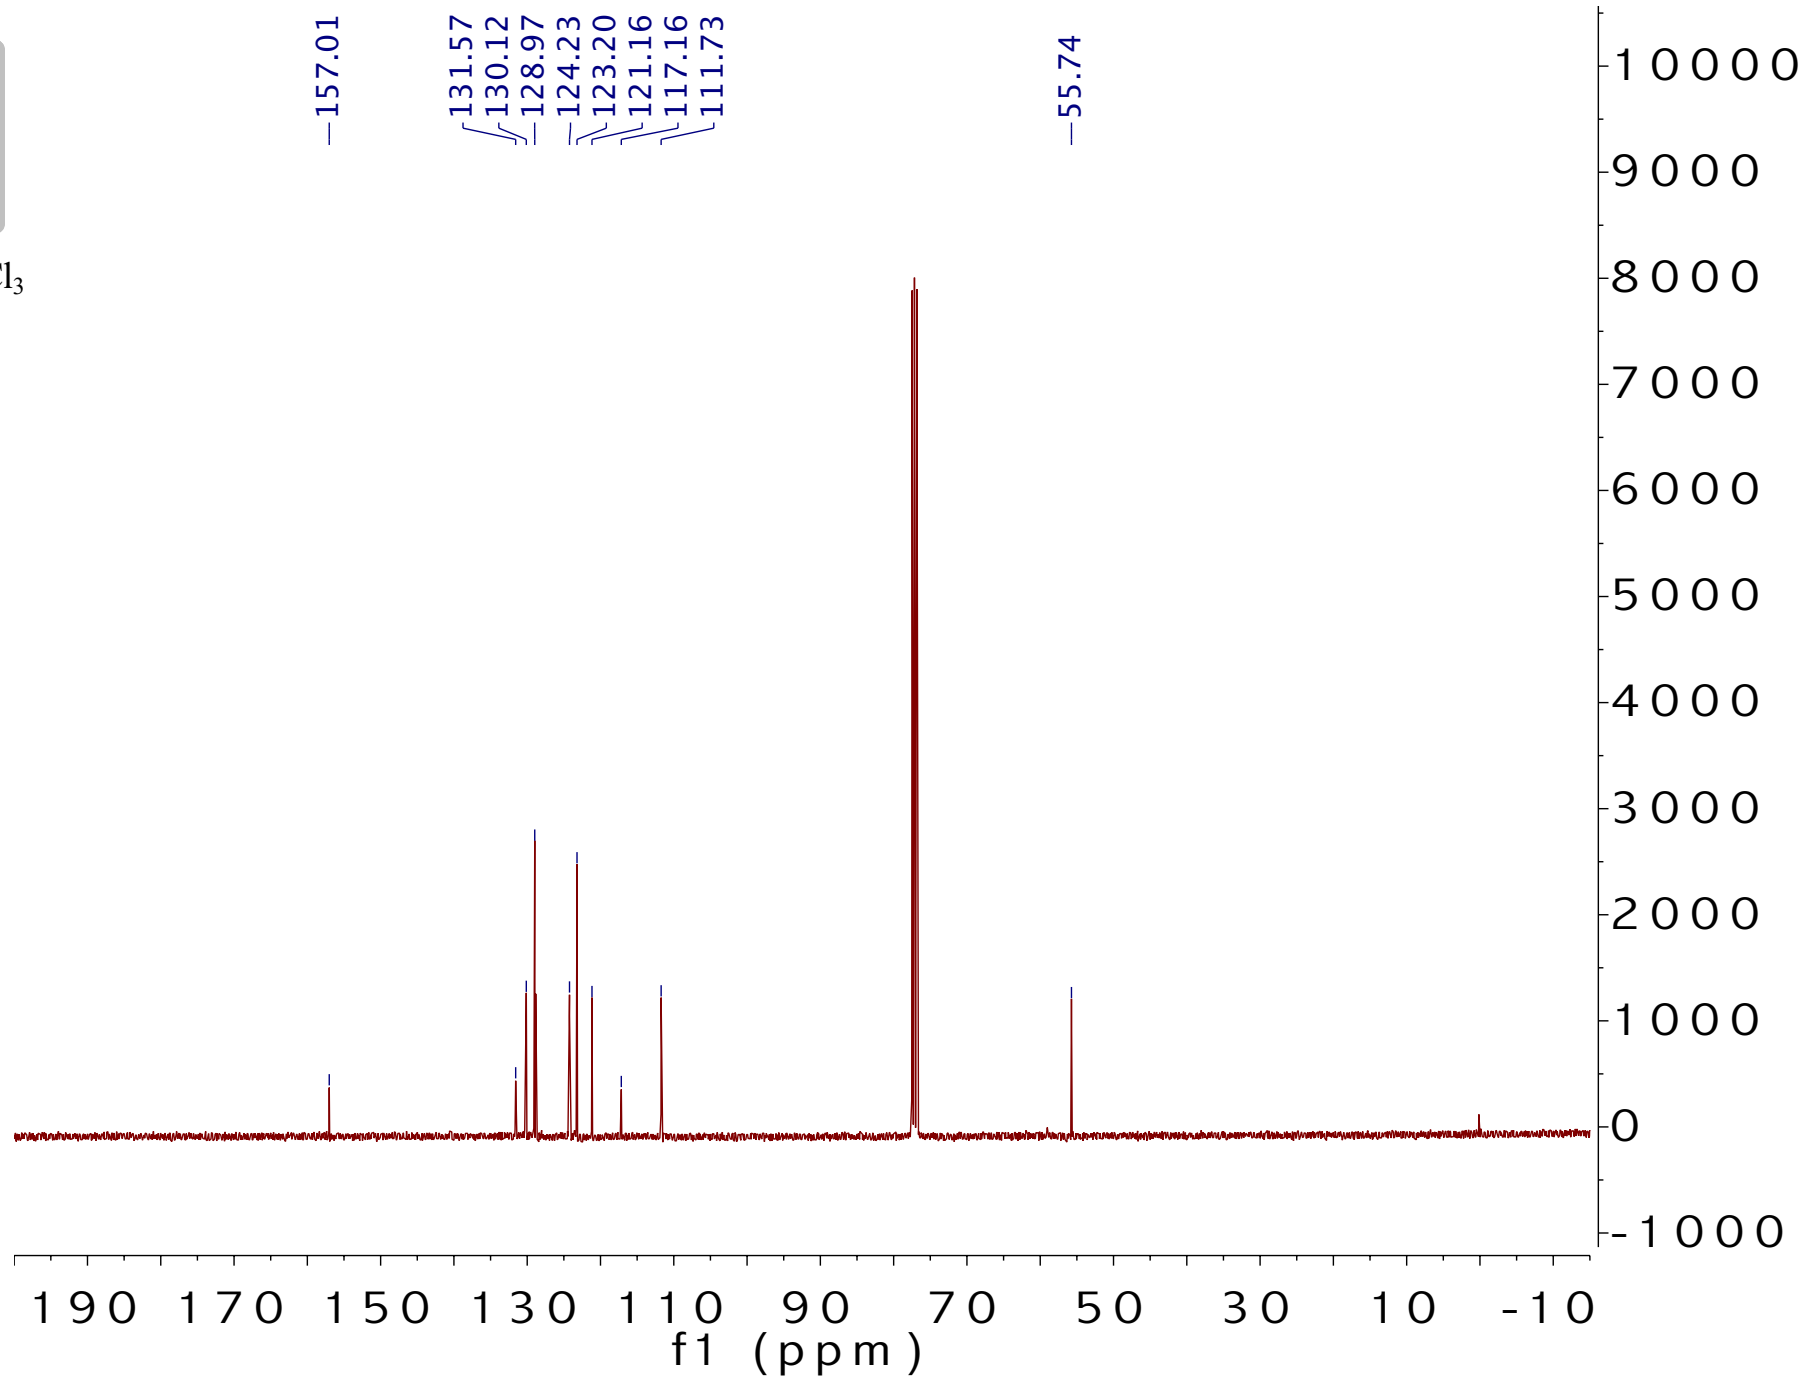



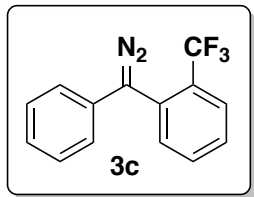

$^1\text{H}$ , 400 MHz,  $\text{CDCl}_3$

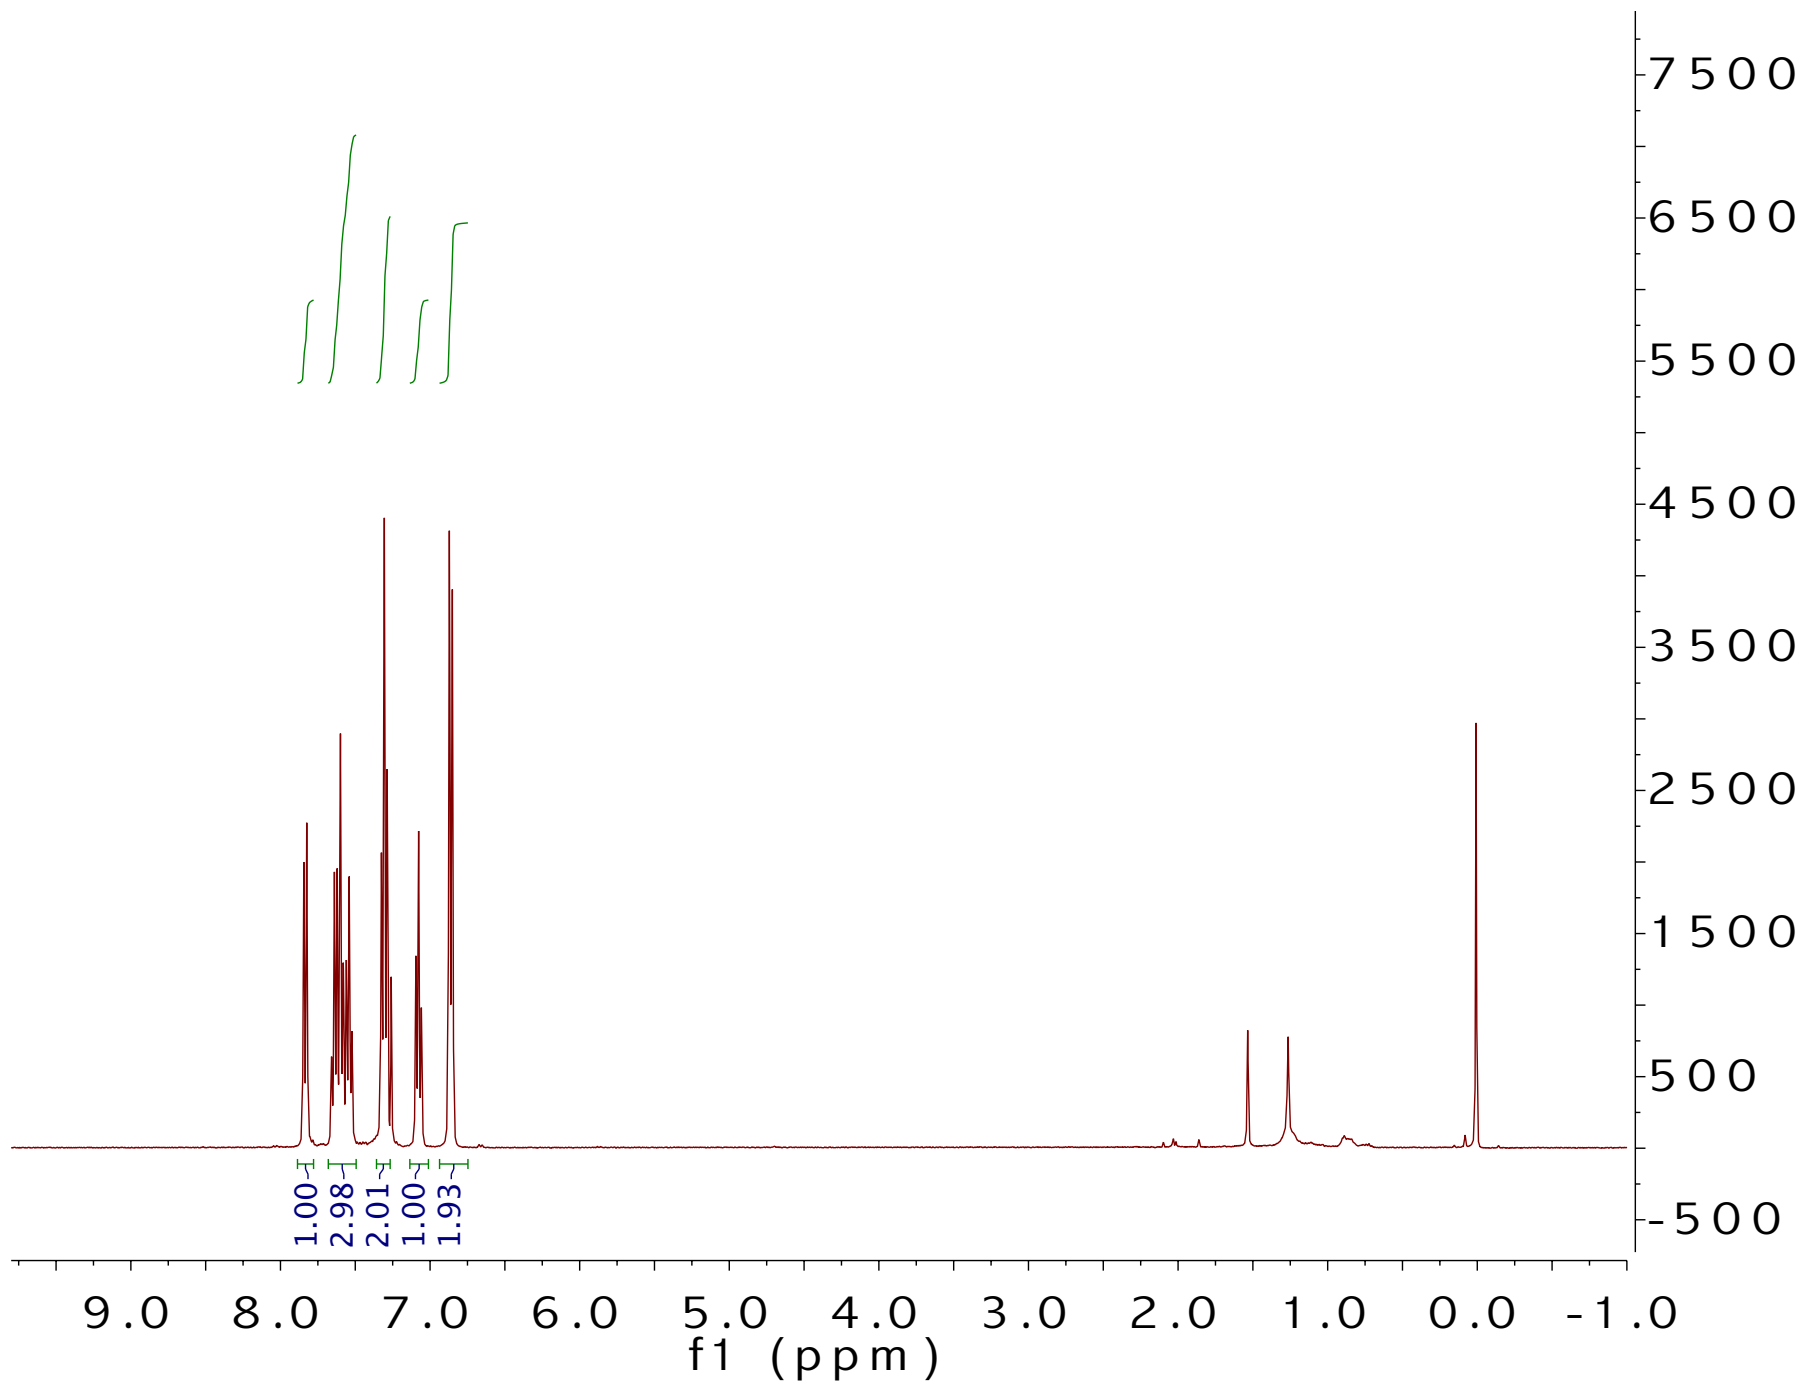

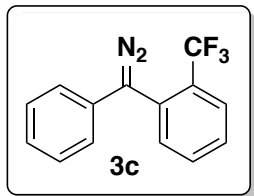

$^{13}\text{C}$ , 100 MHz,  $\text{CDCl}_3$

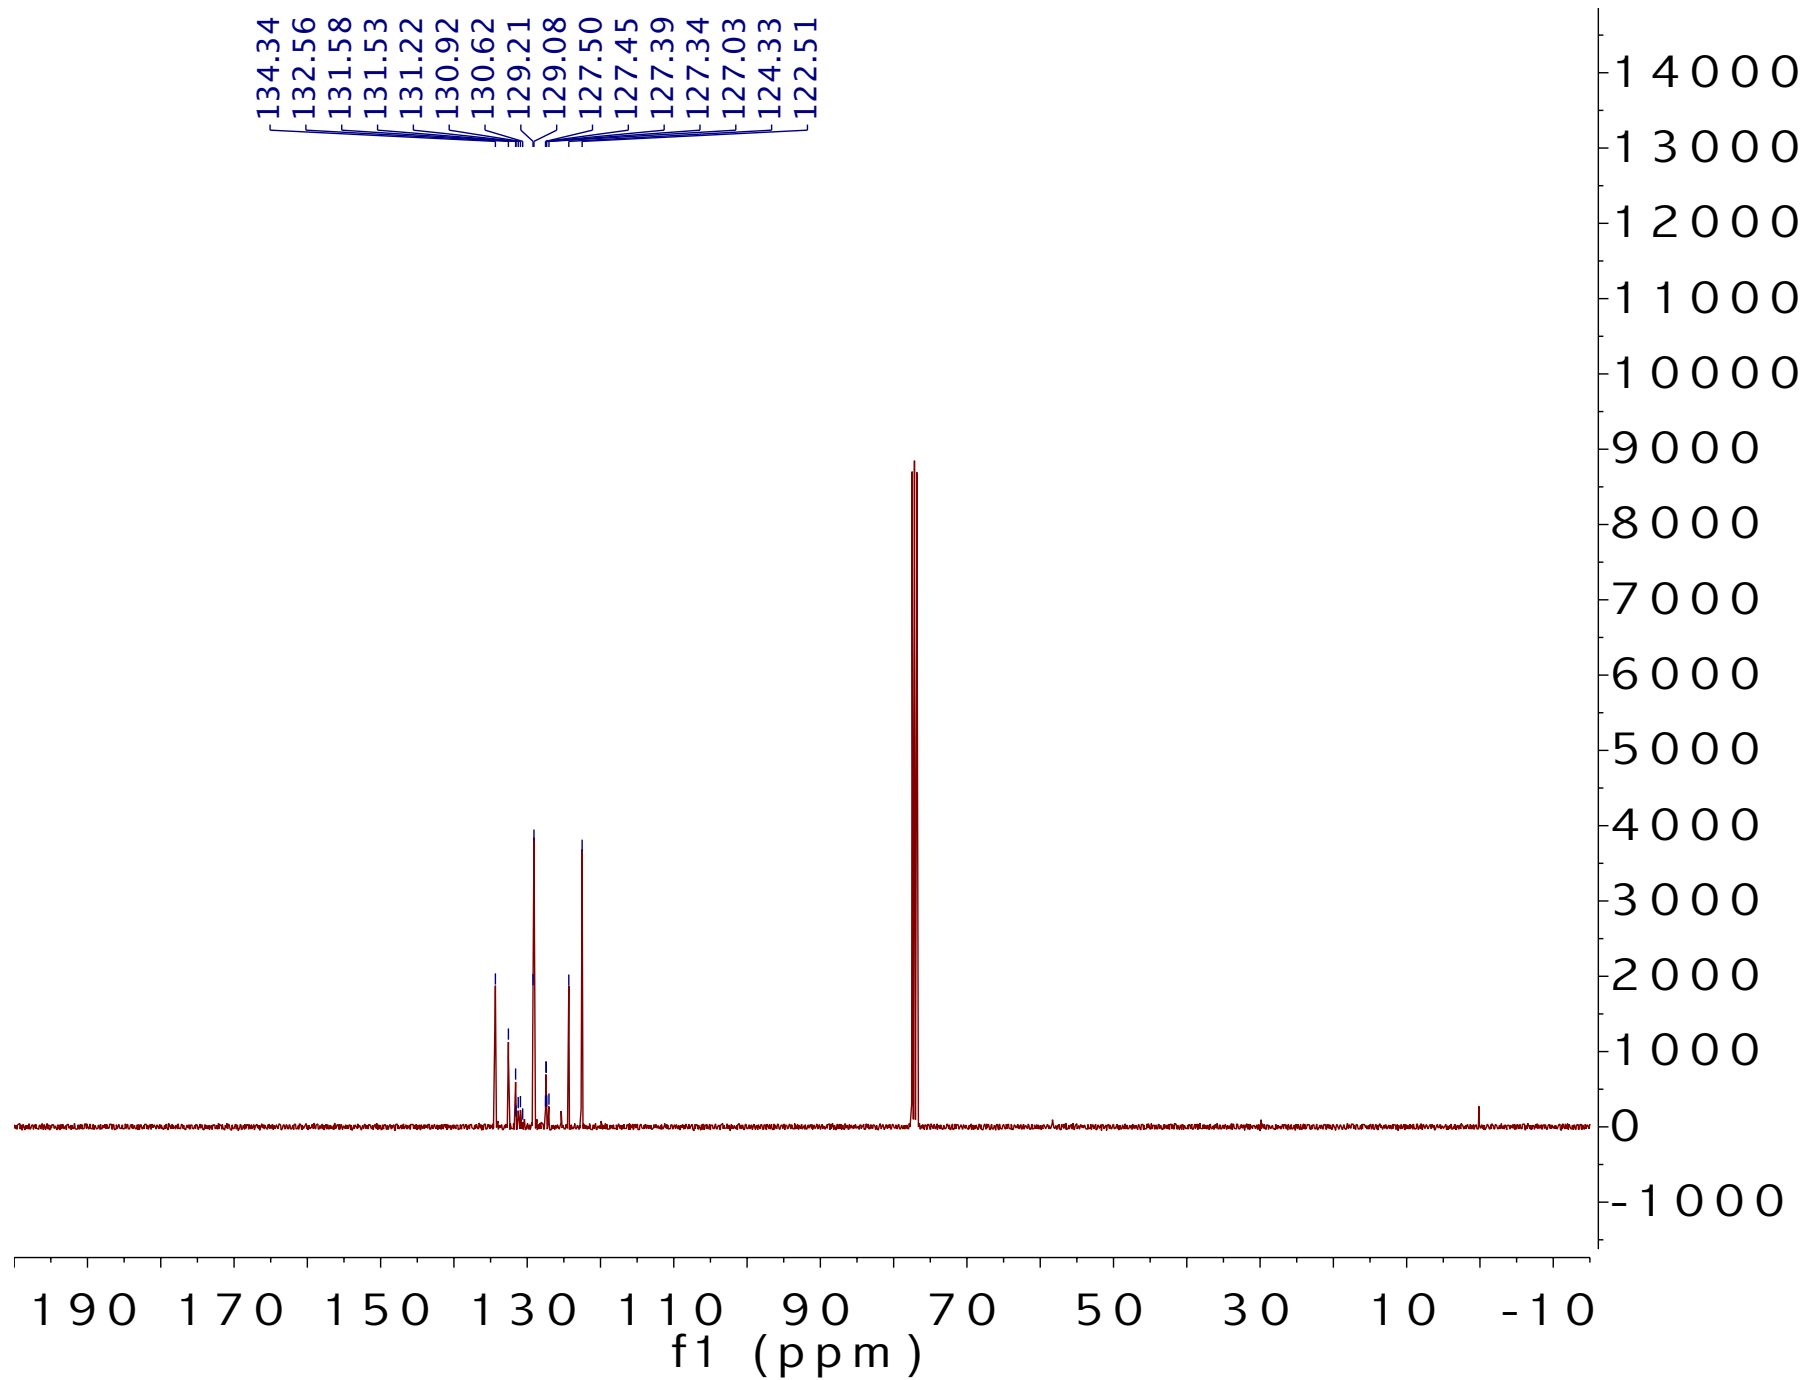

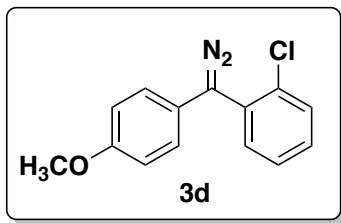

$^1\text{H}$ , 600 MHz,  $\text{CDCl}_3$

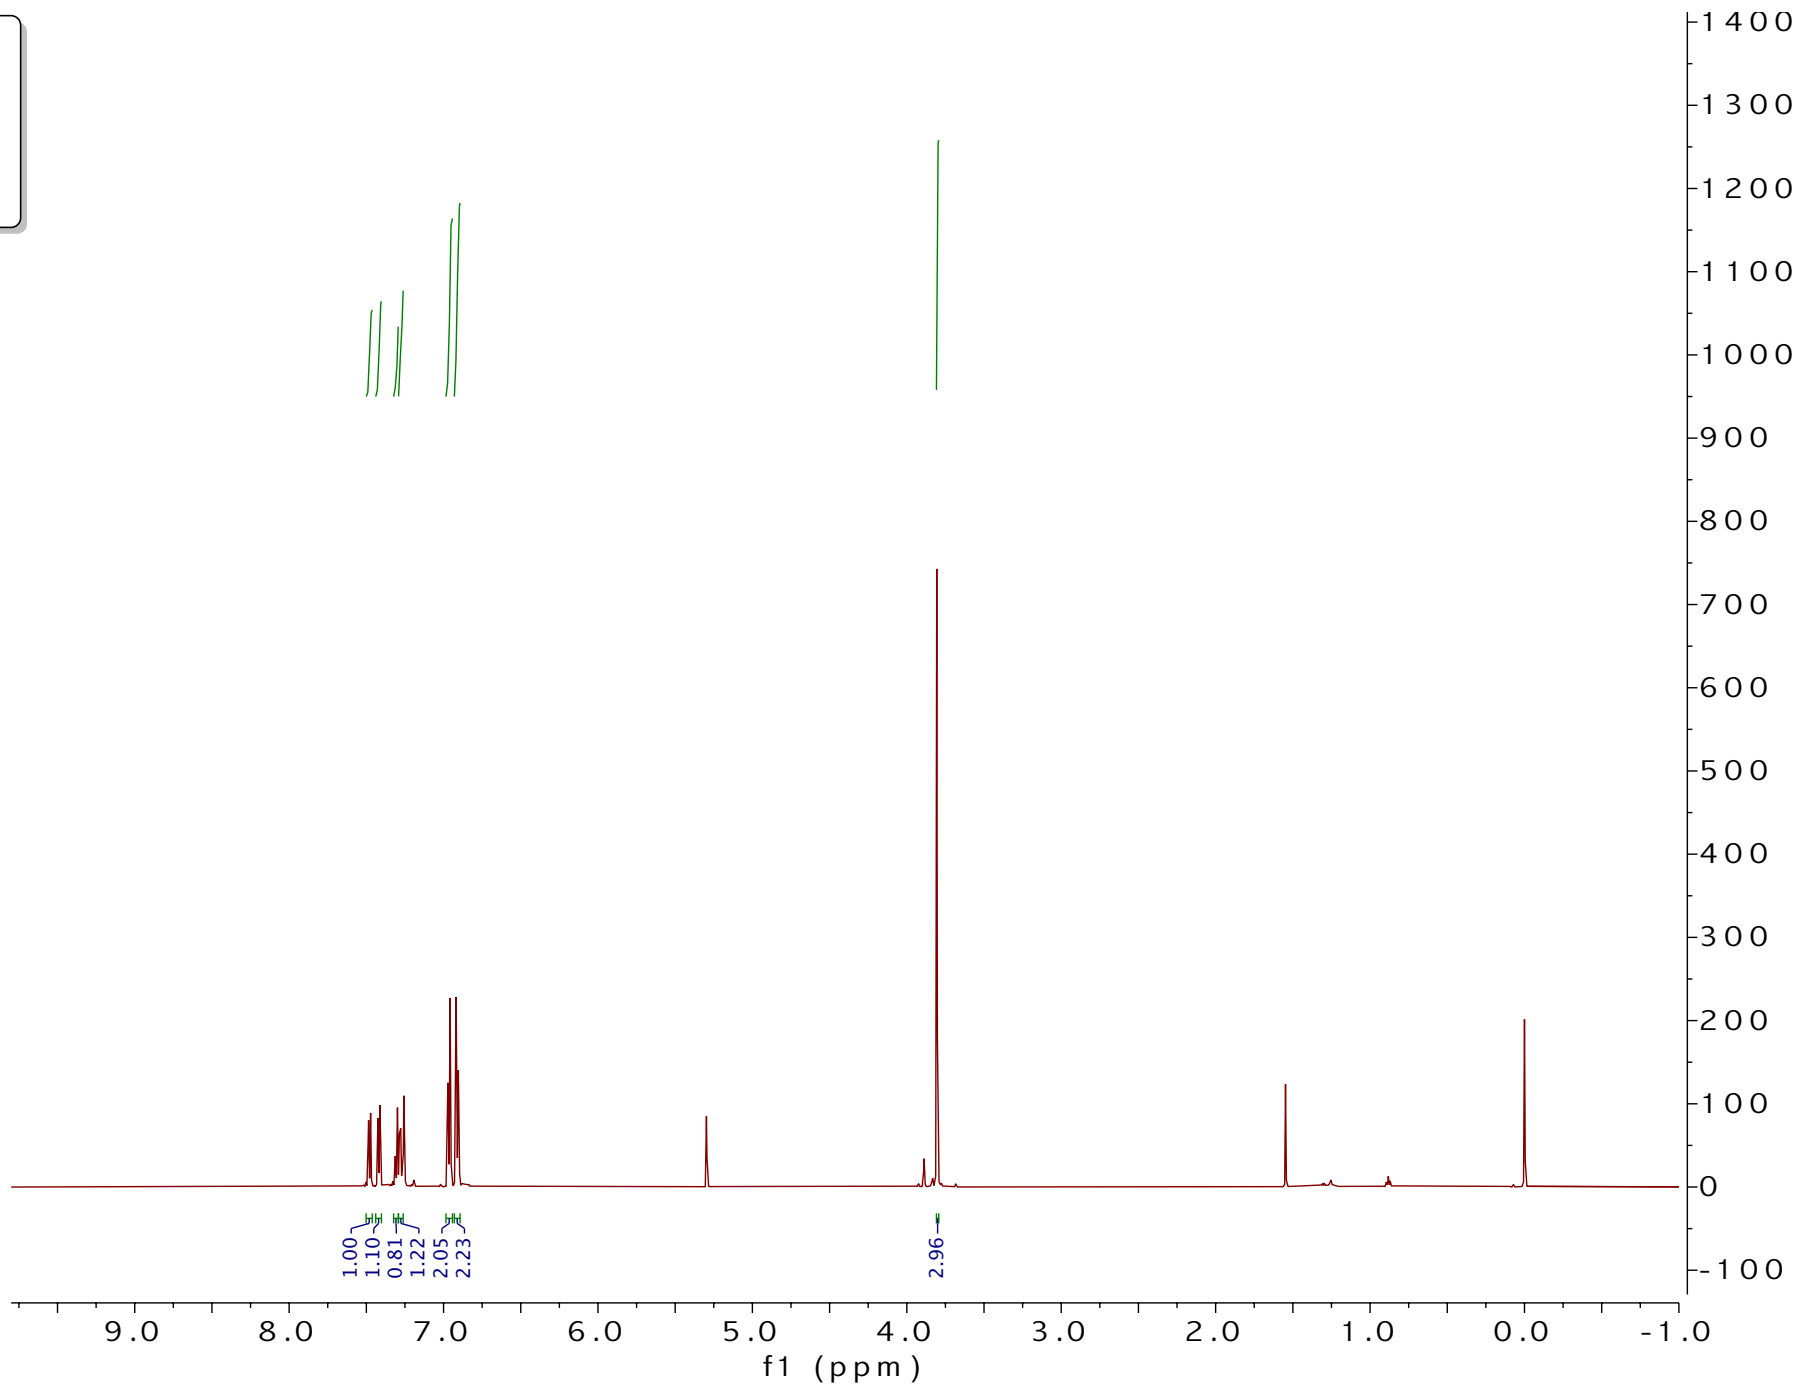

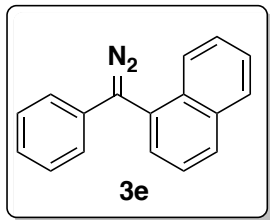

$^1\text{H}$ , 600 MHz,  $\text{CDCl}_3$

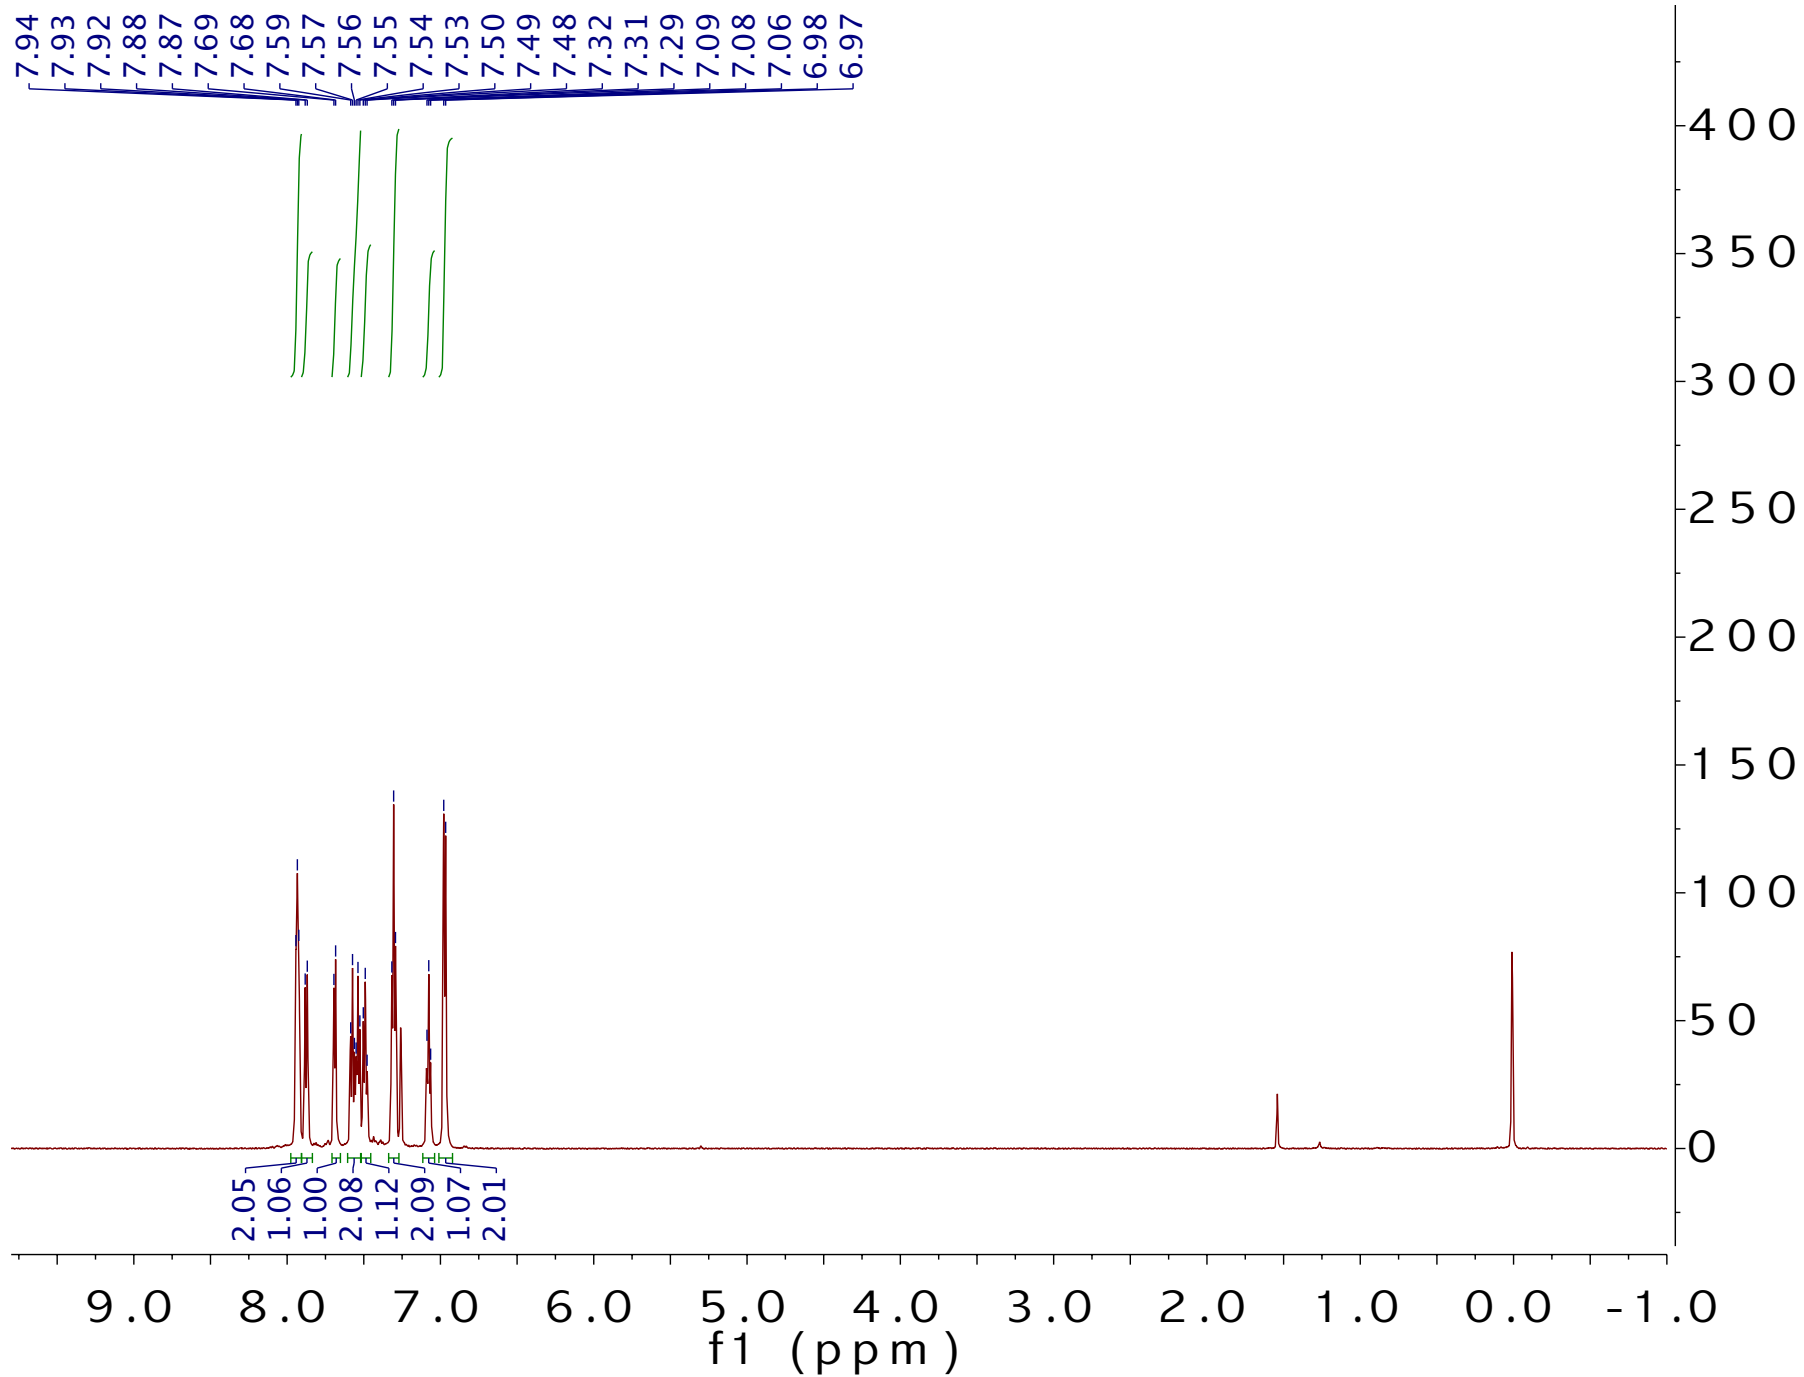



$^{13}\text{C}$ , 151 MHz,  $\text{CDCl}_3$

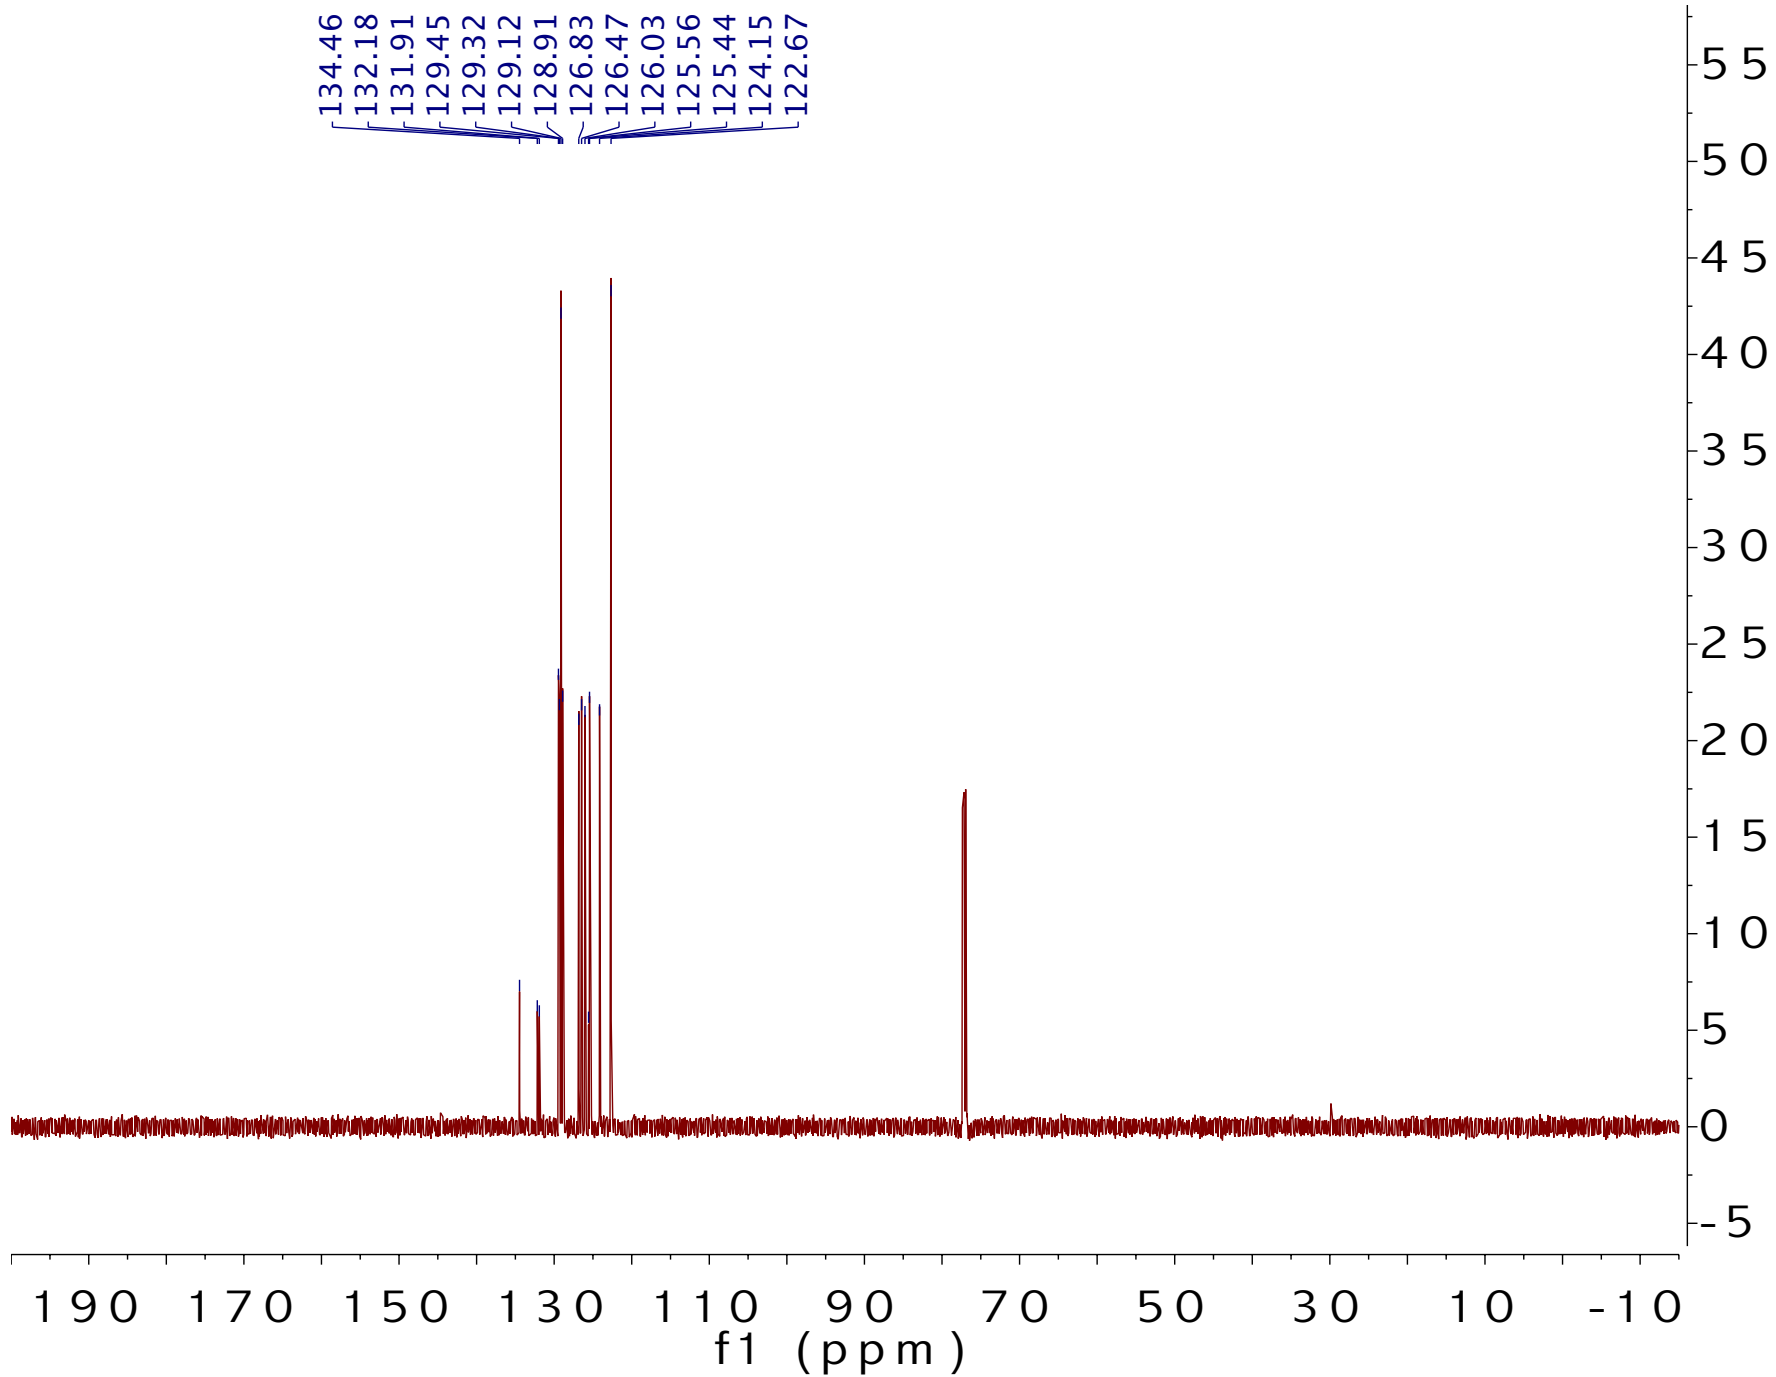

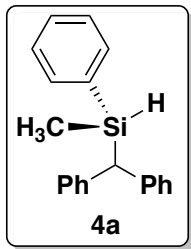

$^1\text{H}$ , 400 MHz,  $\text{CDCl}_3$

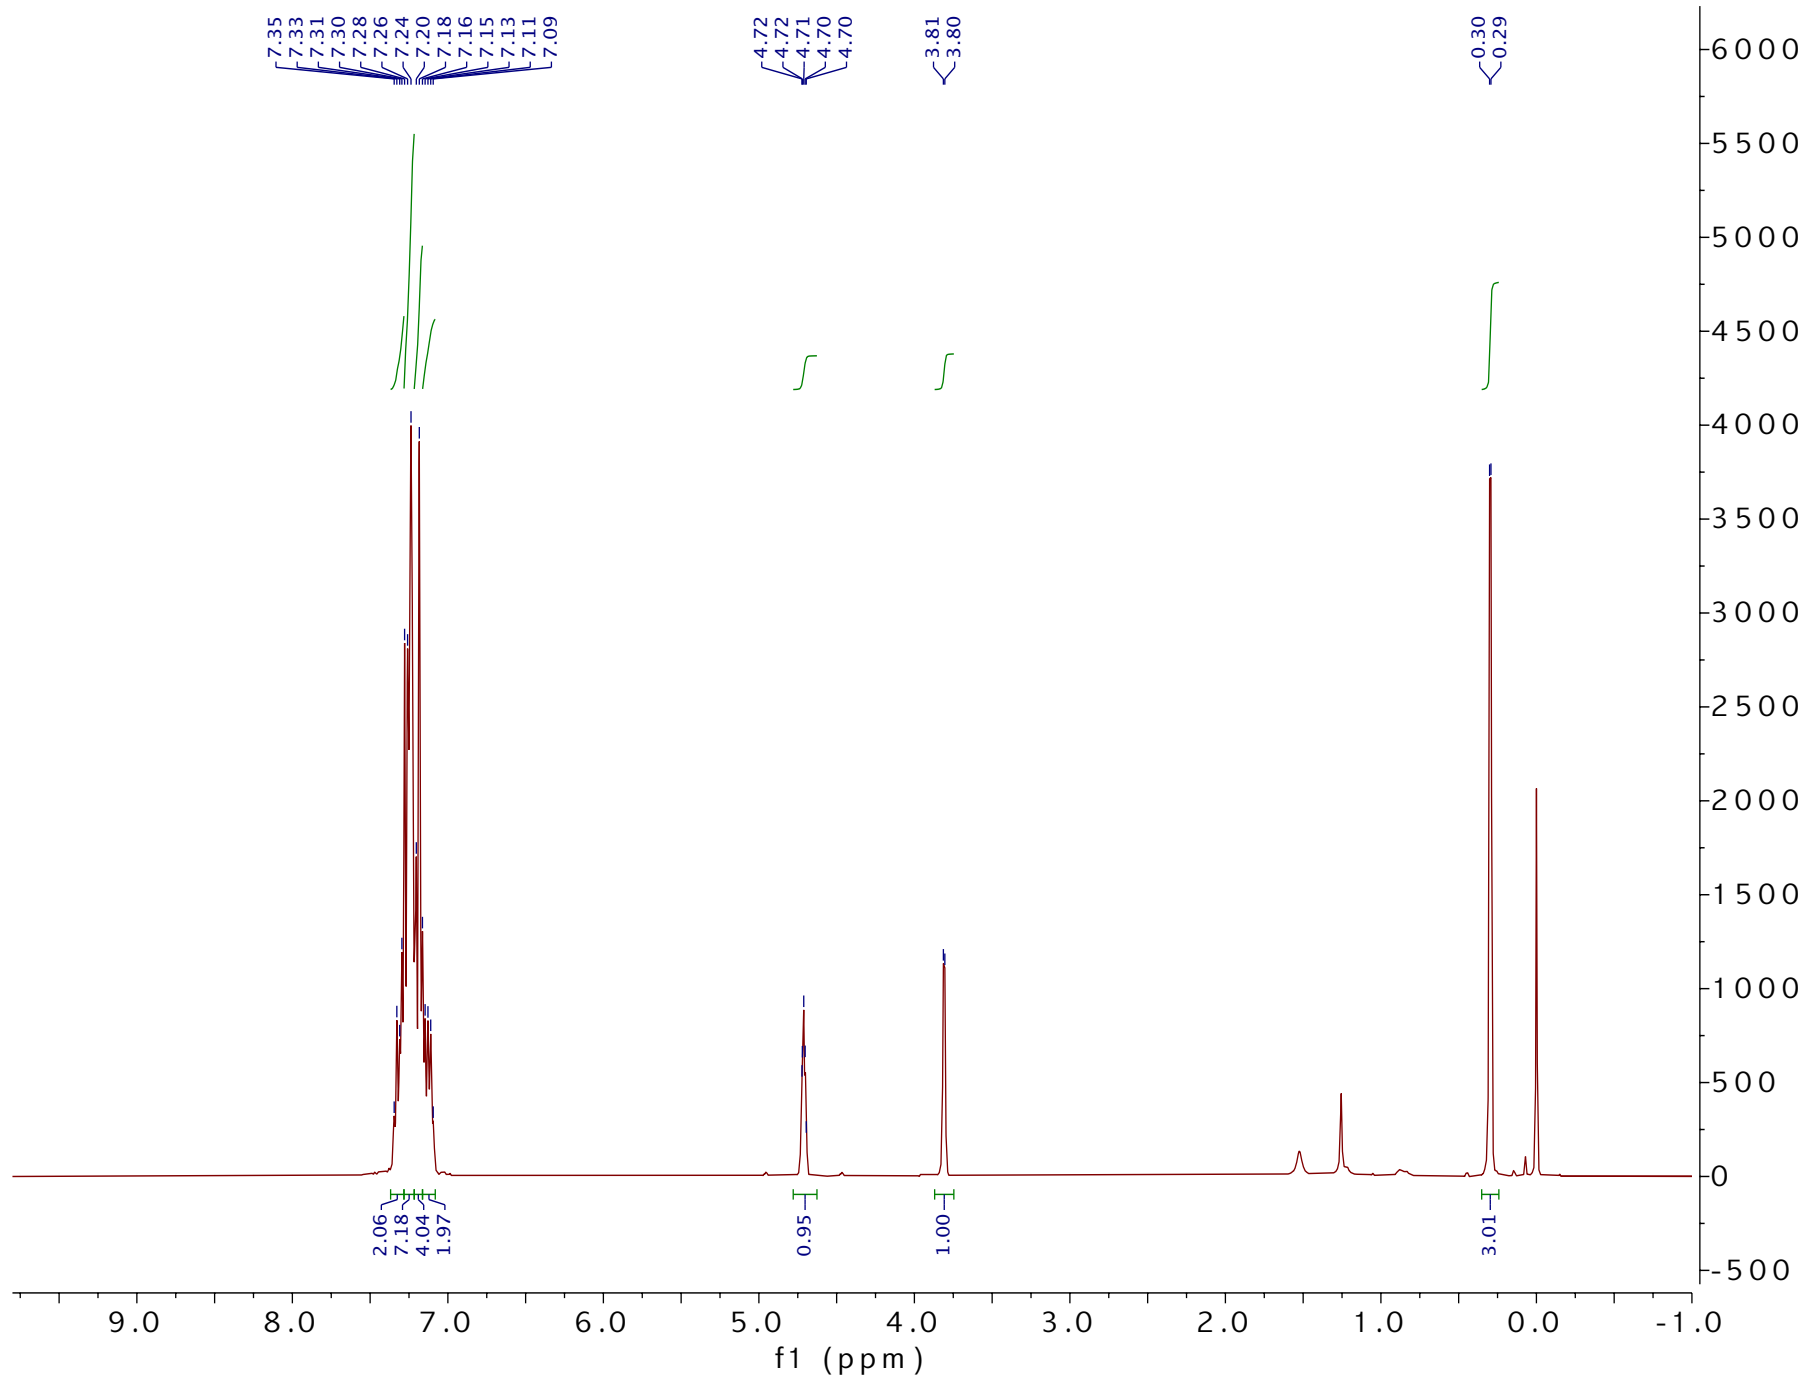

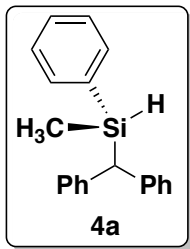

$^{13}\text{C}$ , 100 MHz,  $\text{CDCl}_3$

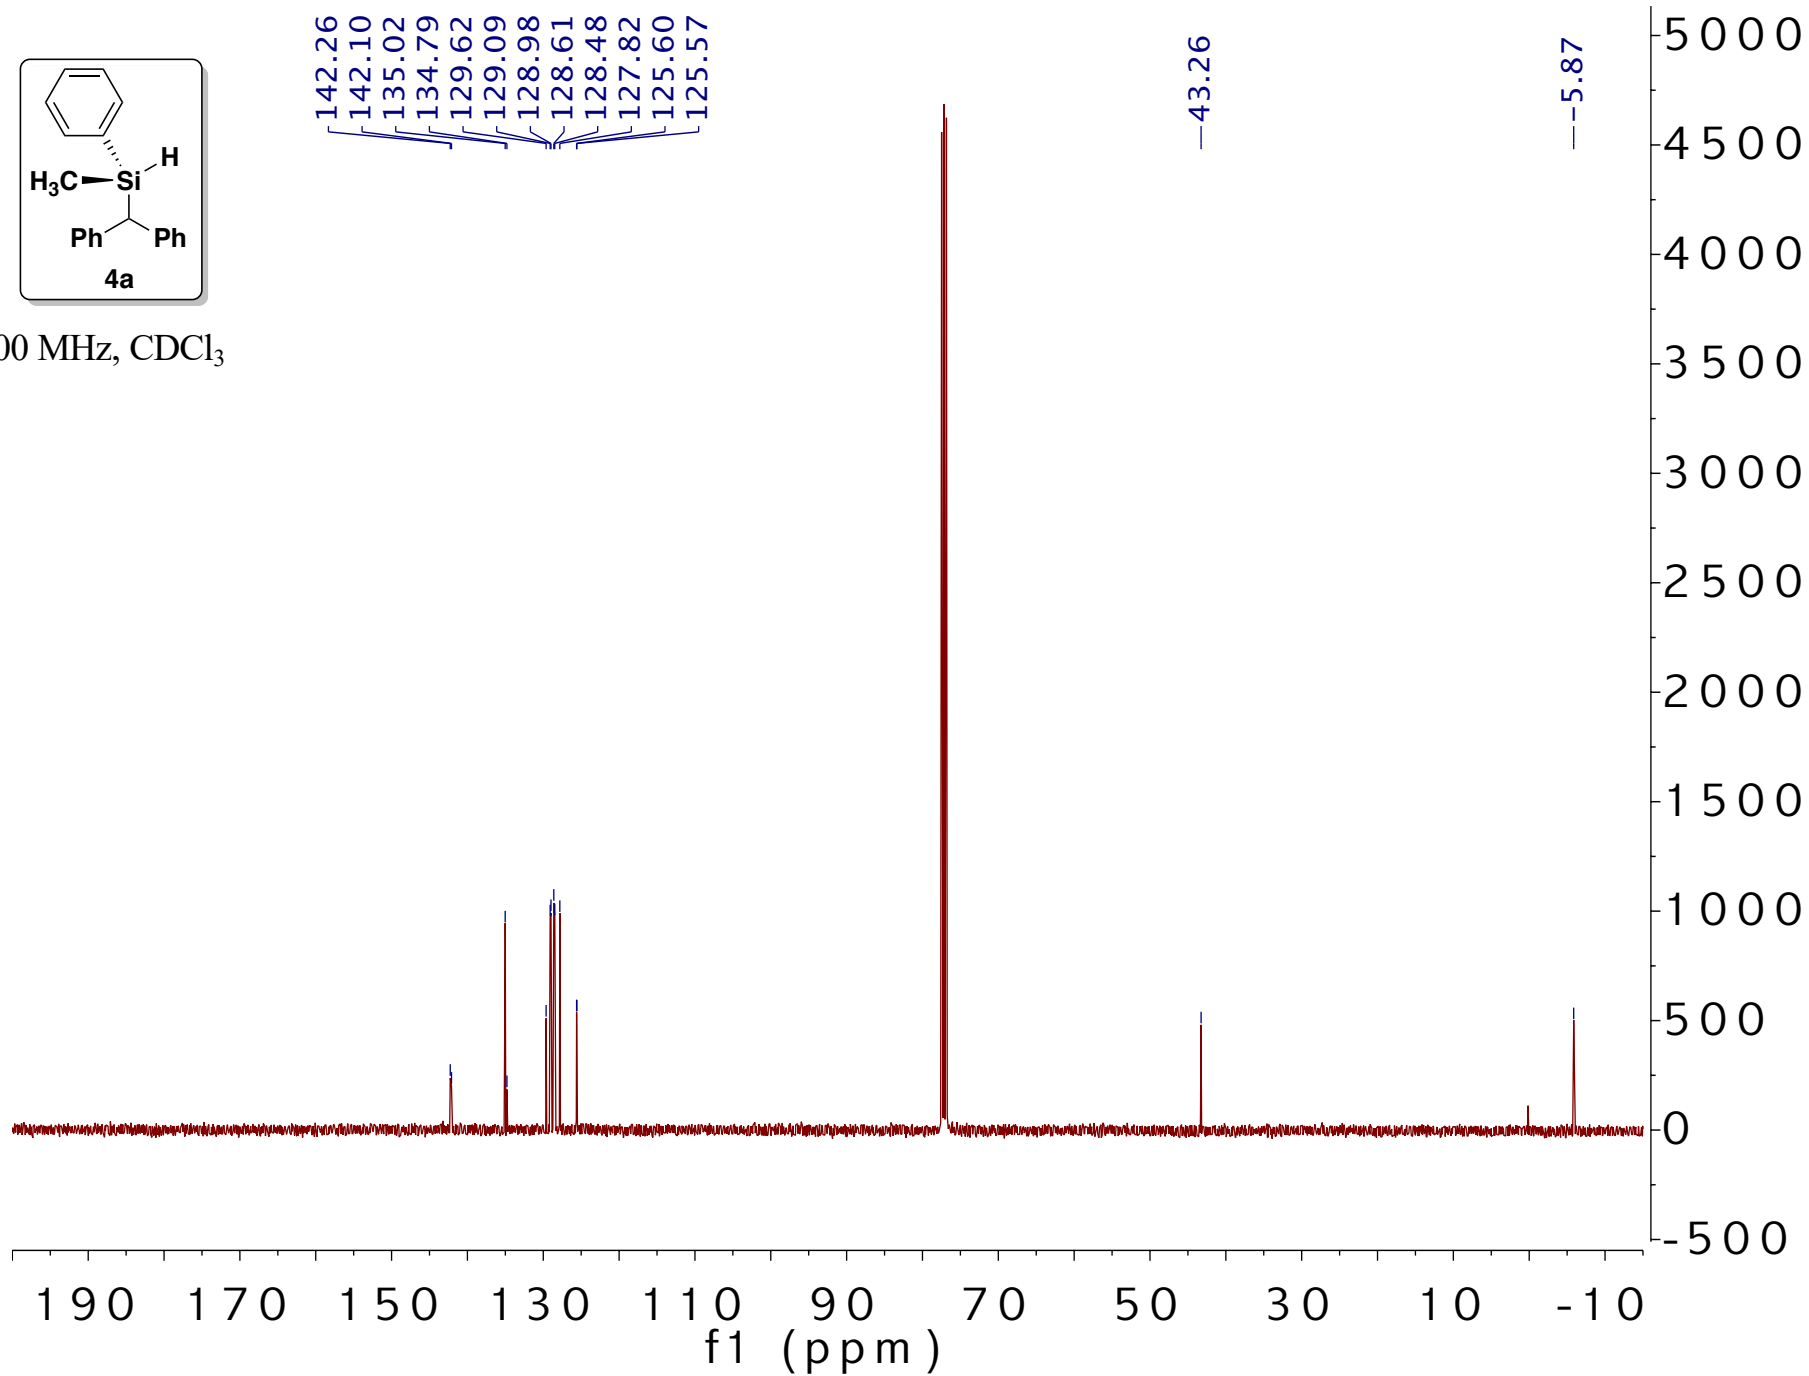

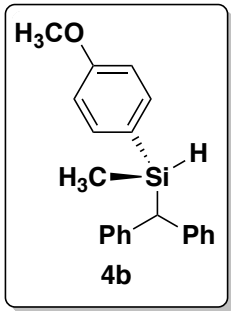

$^1\text{H}$ , 600 MHz,  $\text{CDCl}_3$

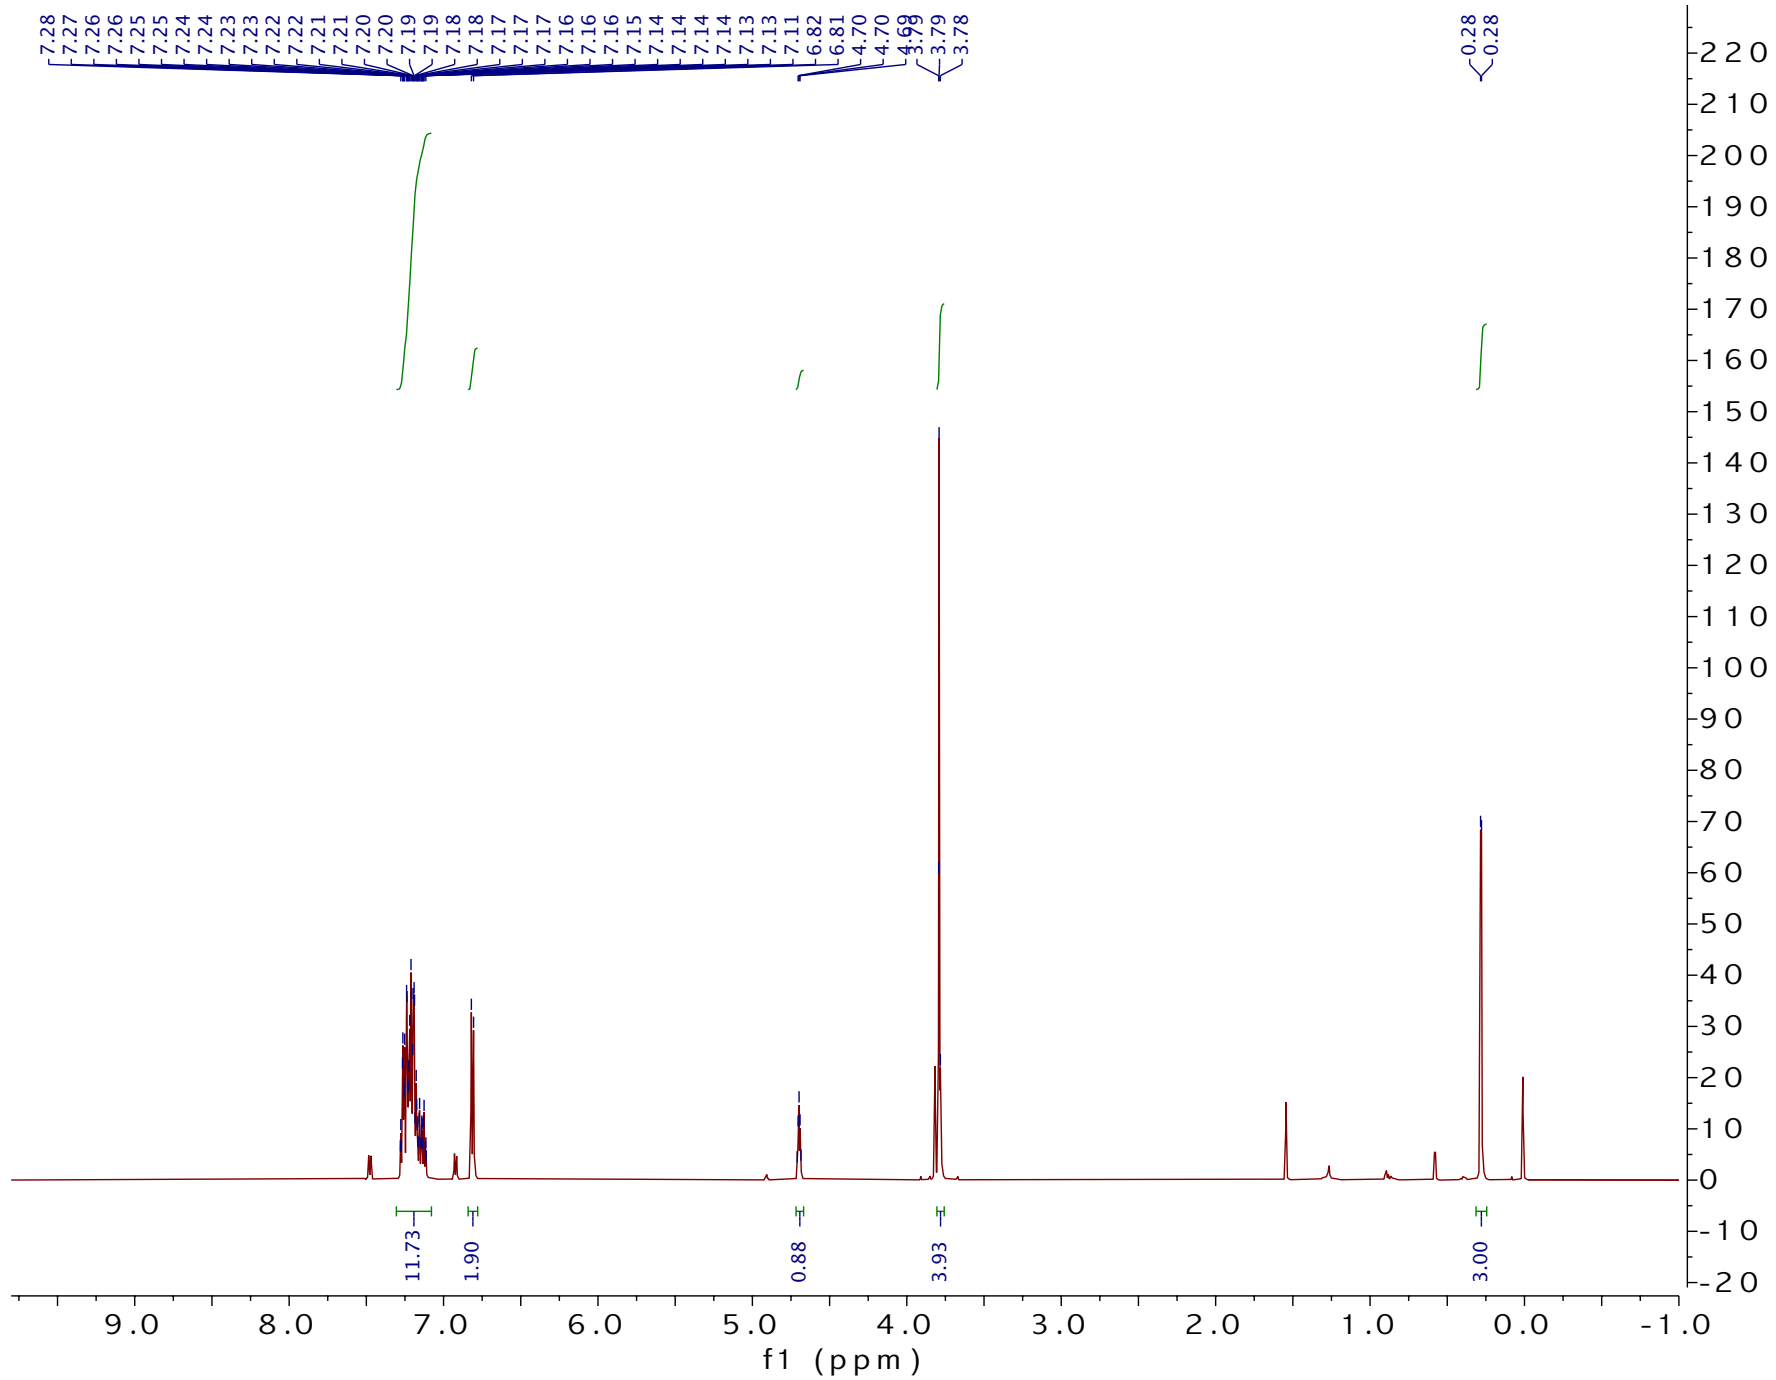



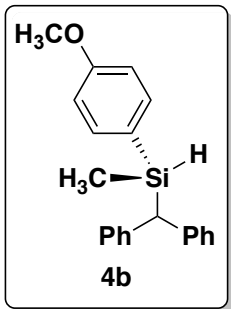

$^{13}\text{C}$ , 151 MHz,  $\text{CDCl}_3$

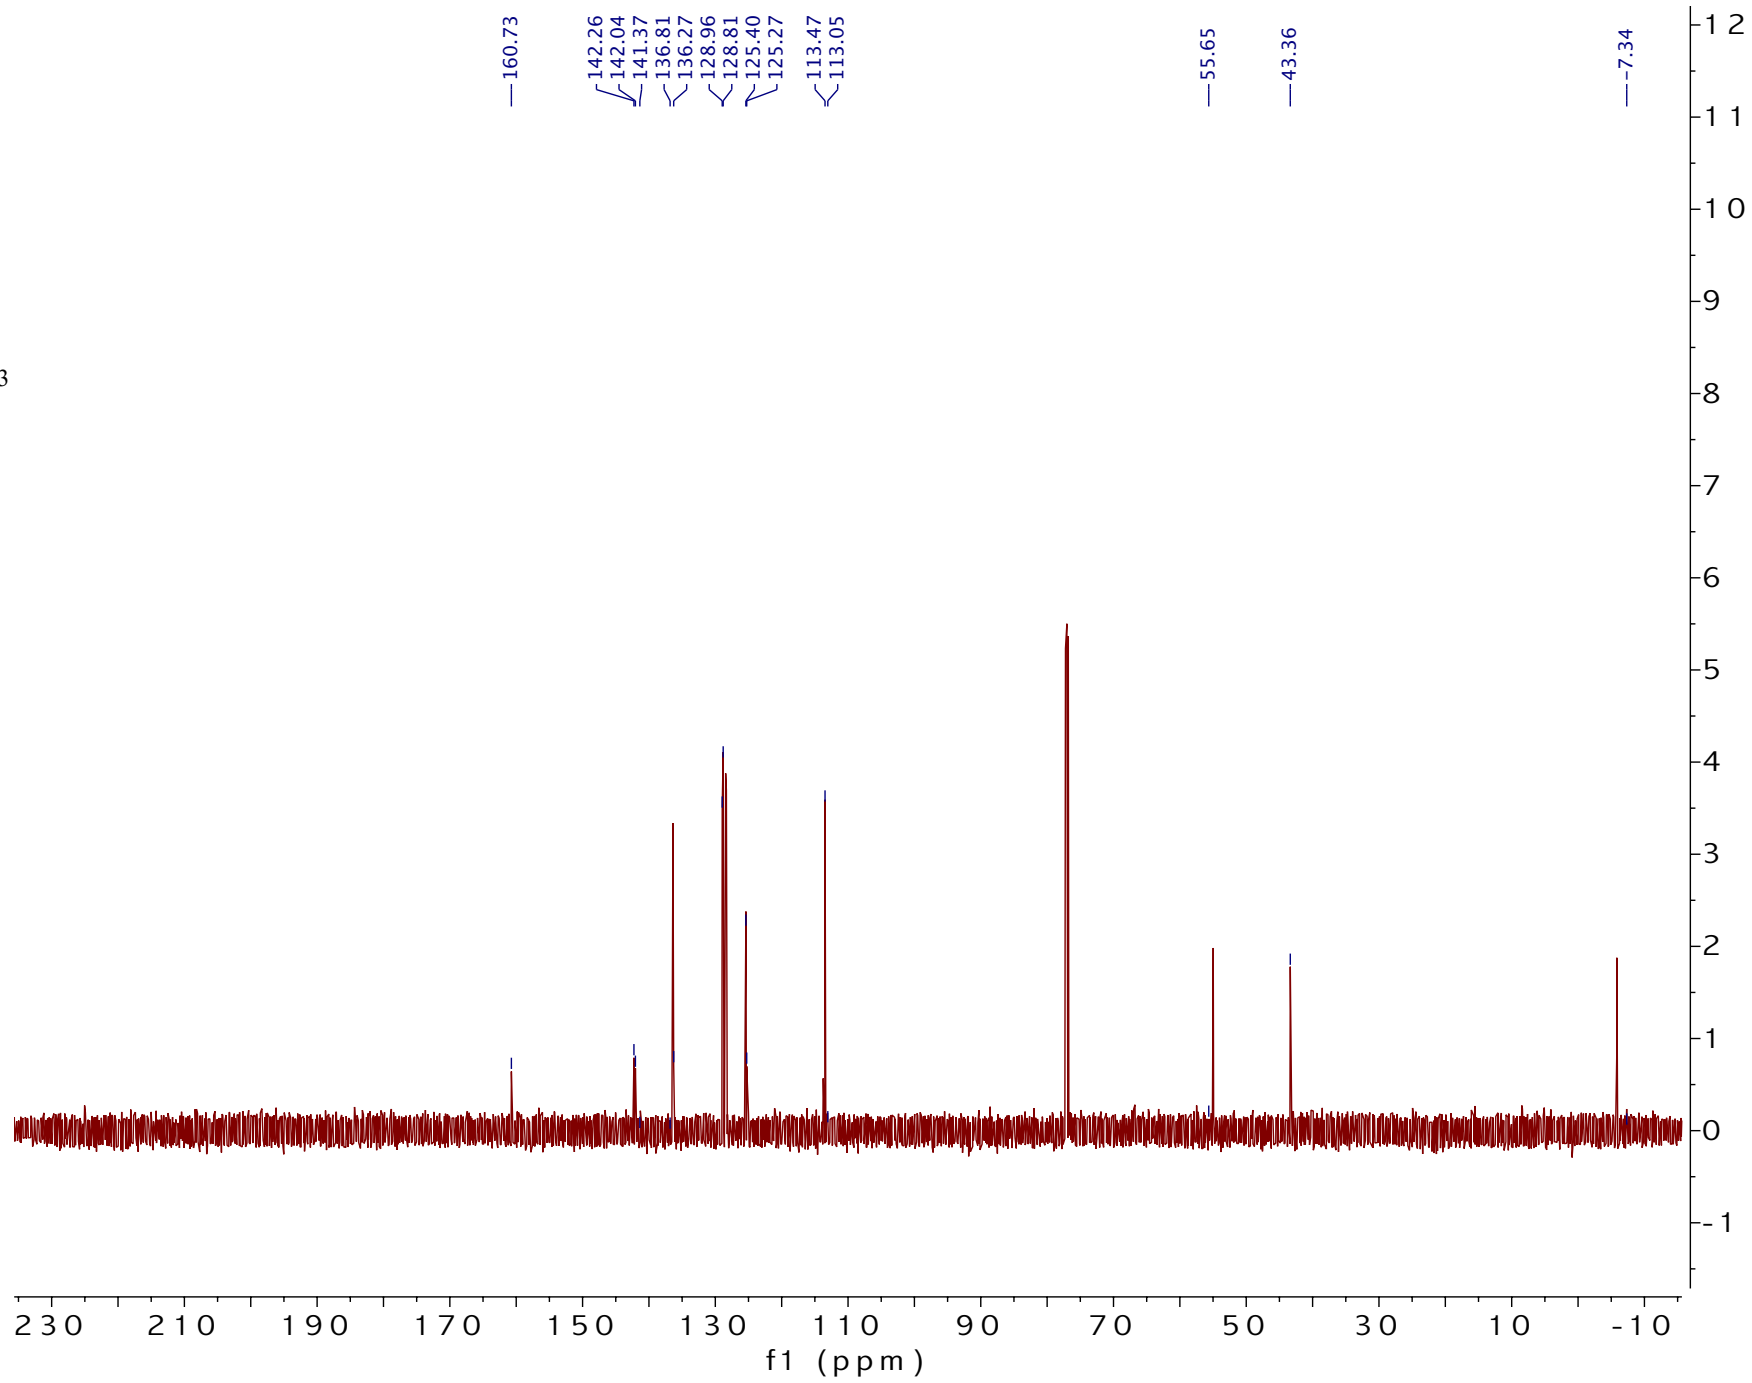

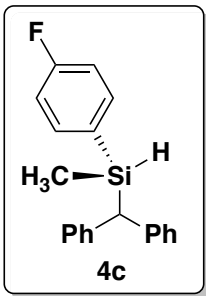

$^1\text{H}$ , 400 MHz,  $\text{CDCl}_3$

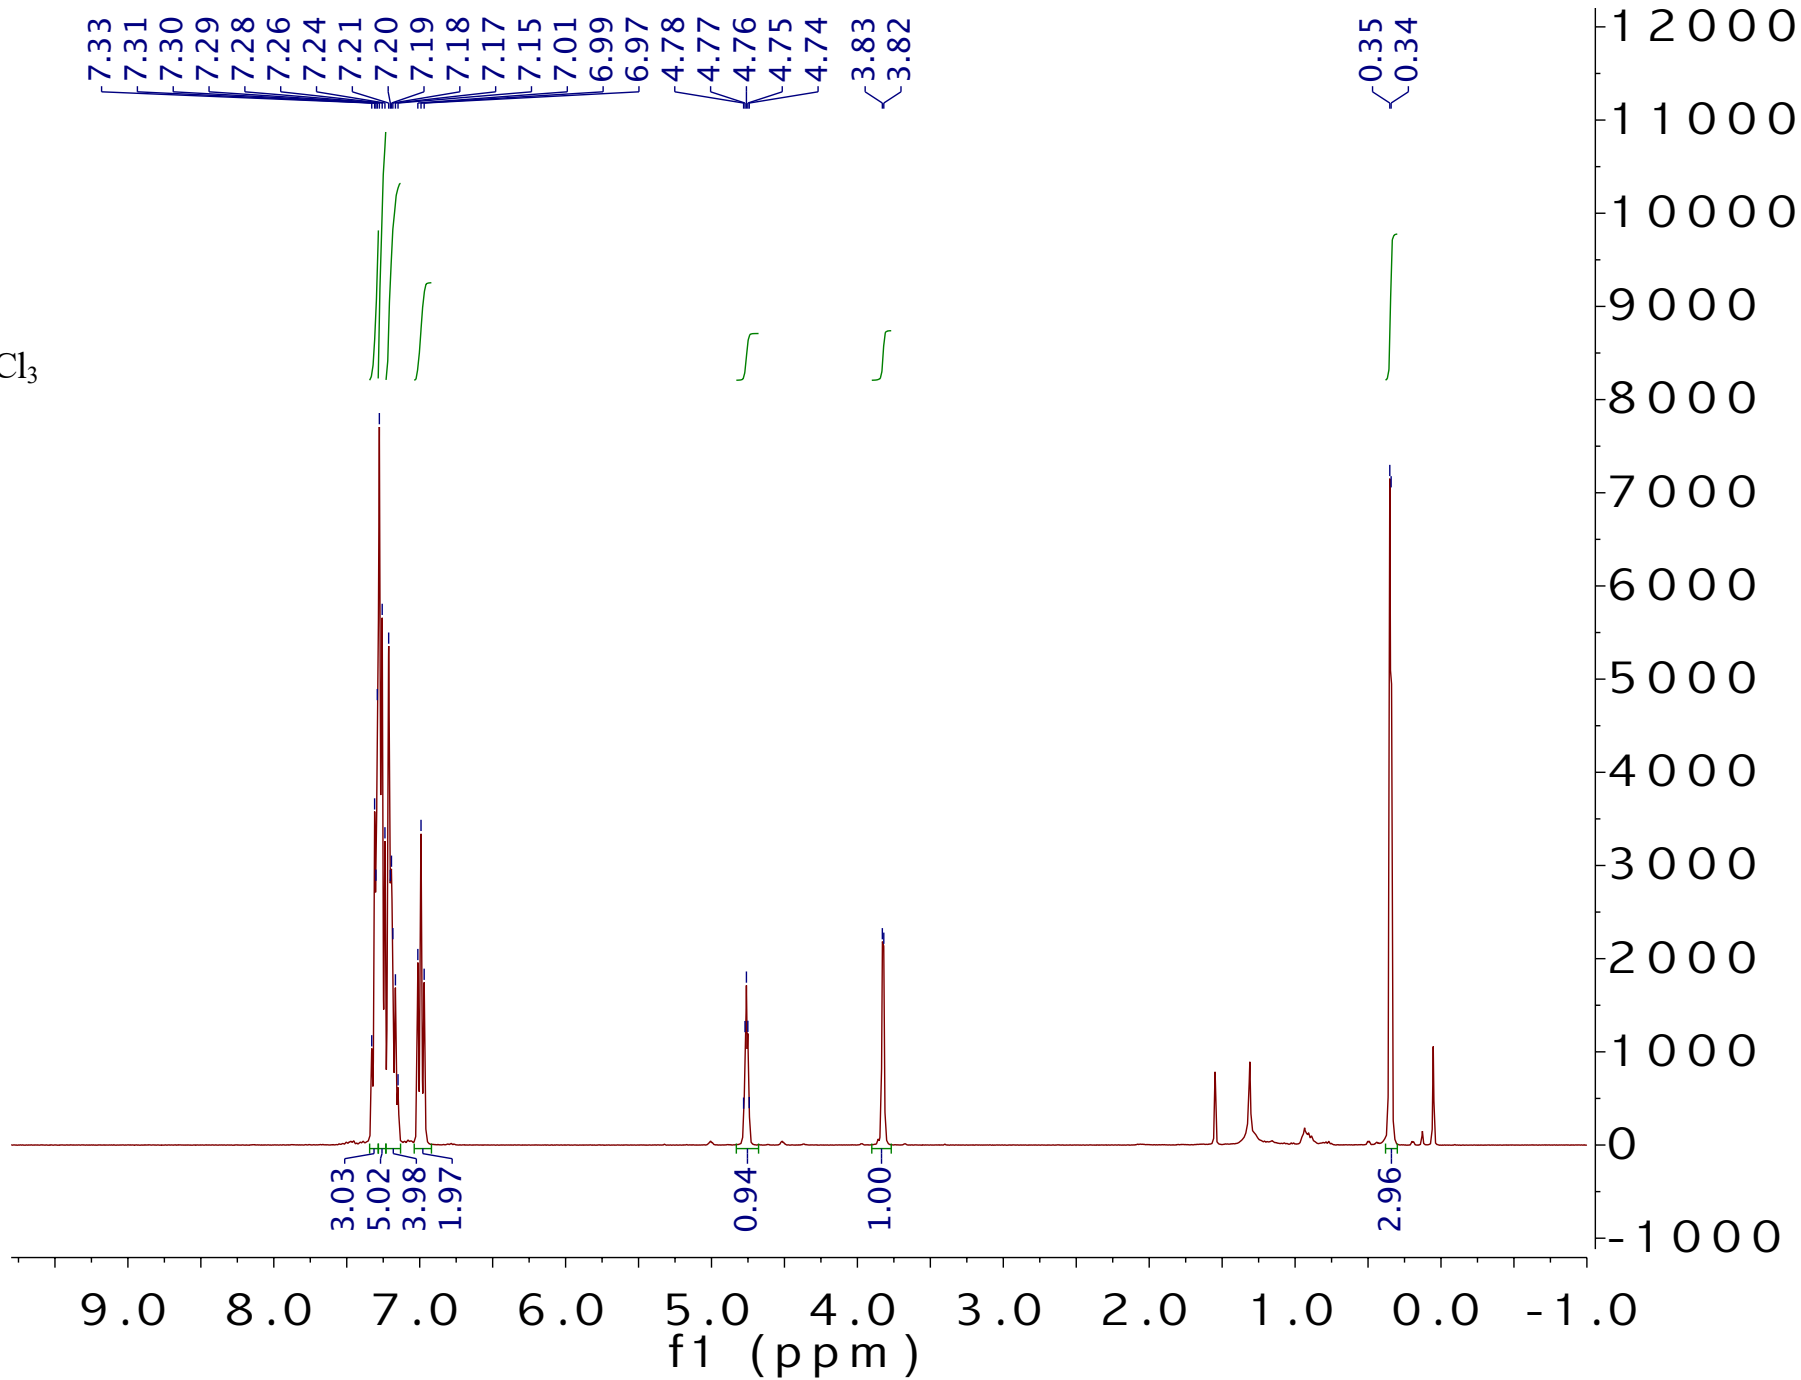

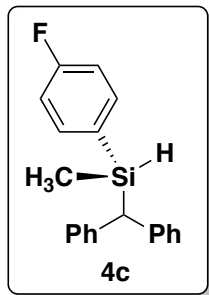

$^{13}\text{C}$ , 100 MHz,  $\text{CDCl}_3$

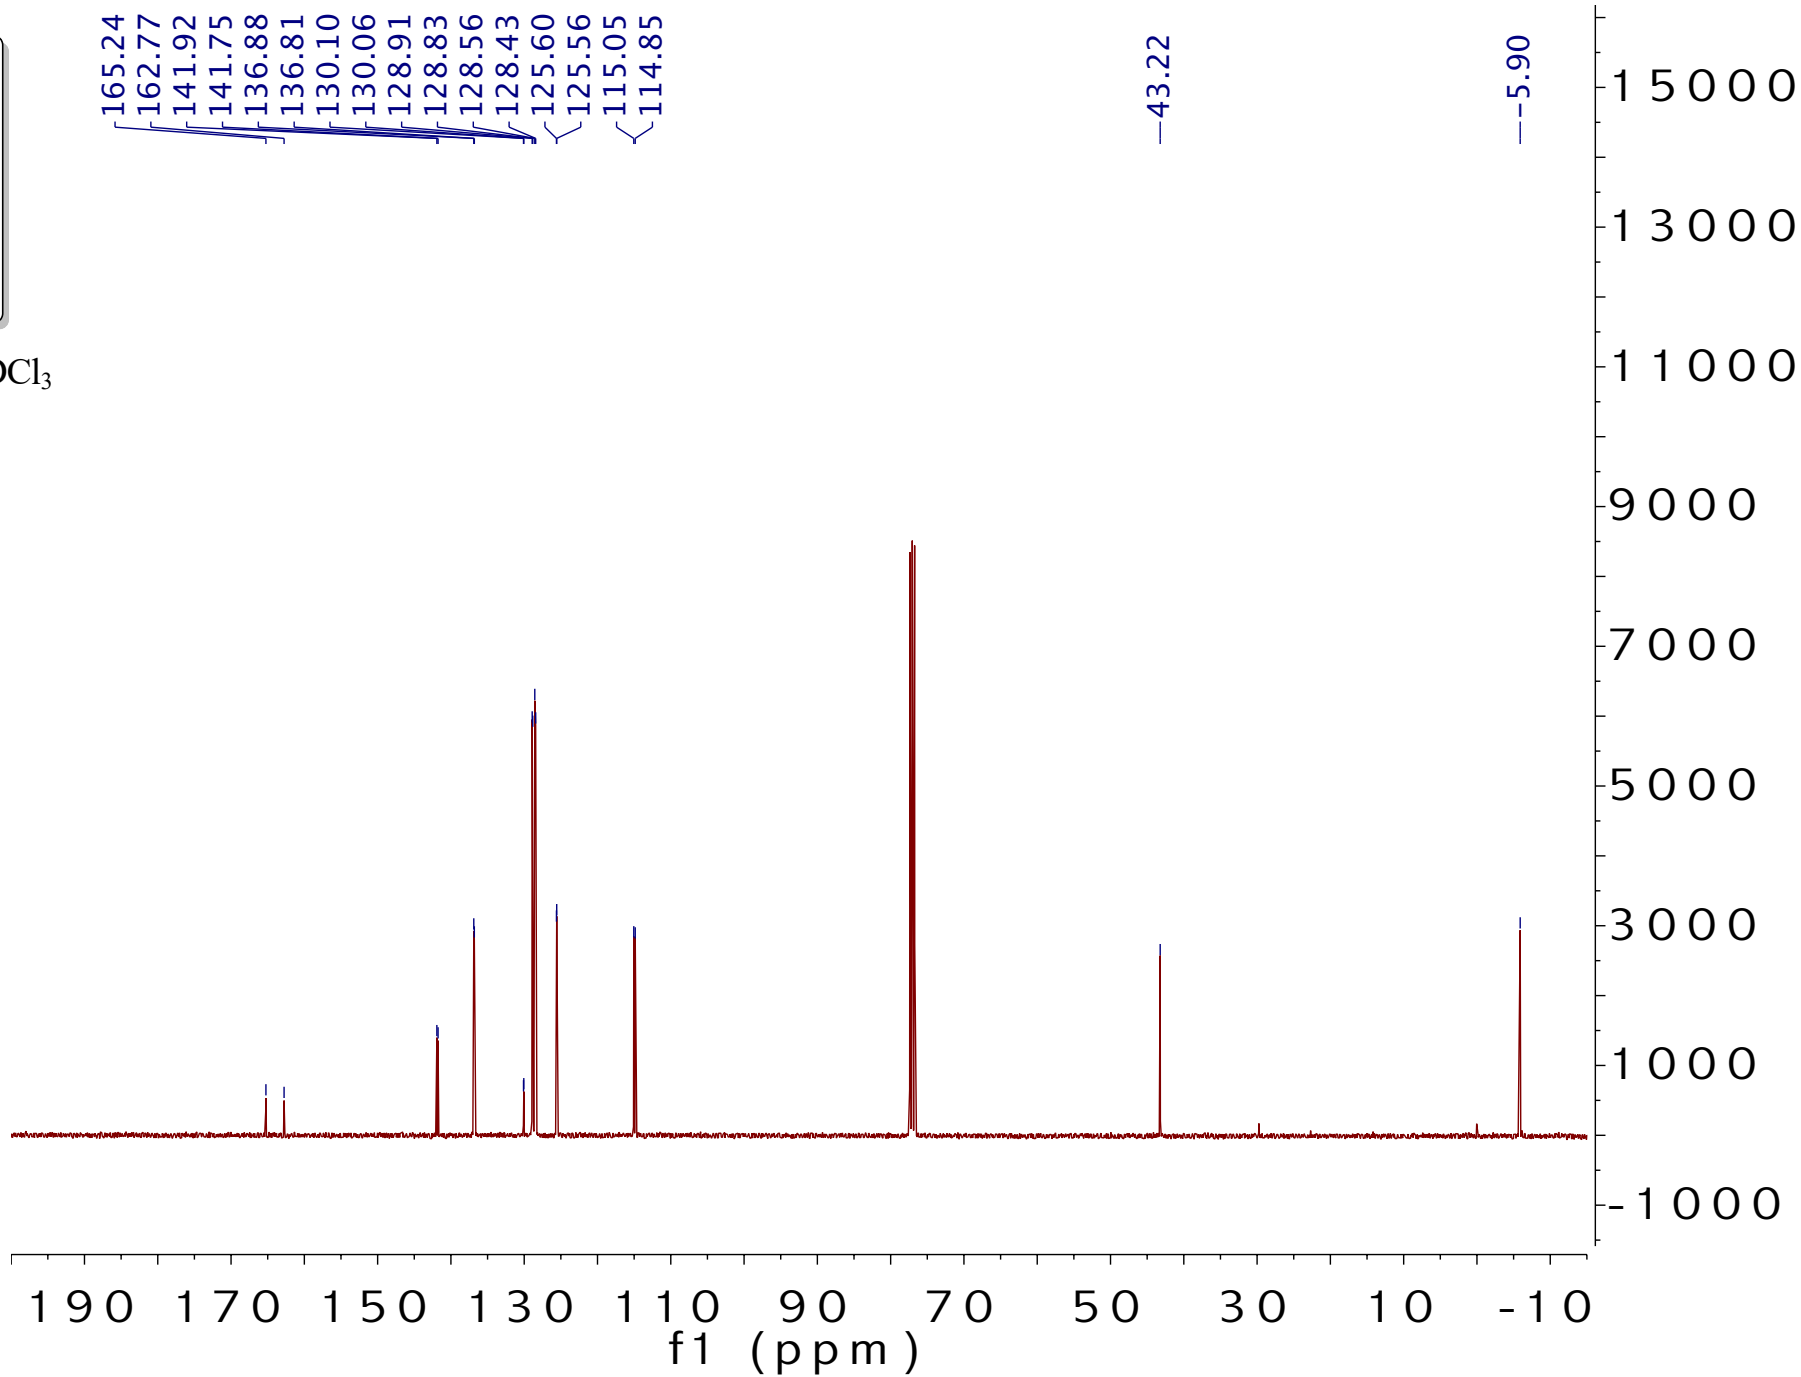

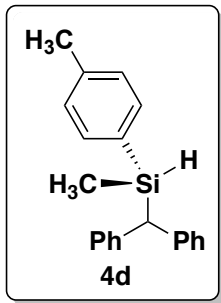

$^1\text{H}$ , 600 MHz,  $\text{CDCl}_3$

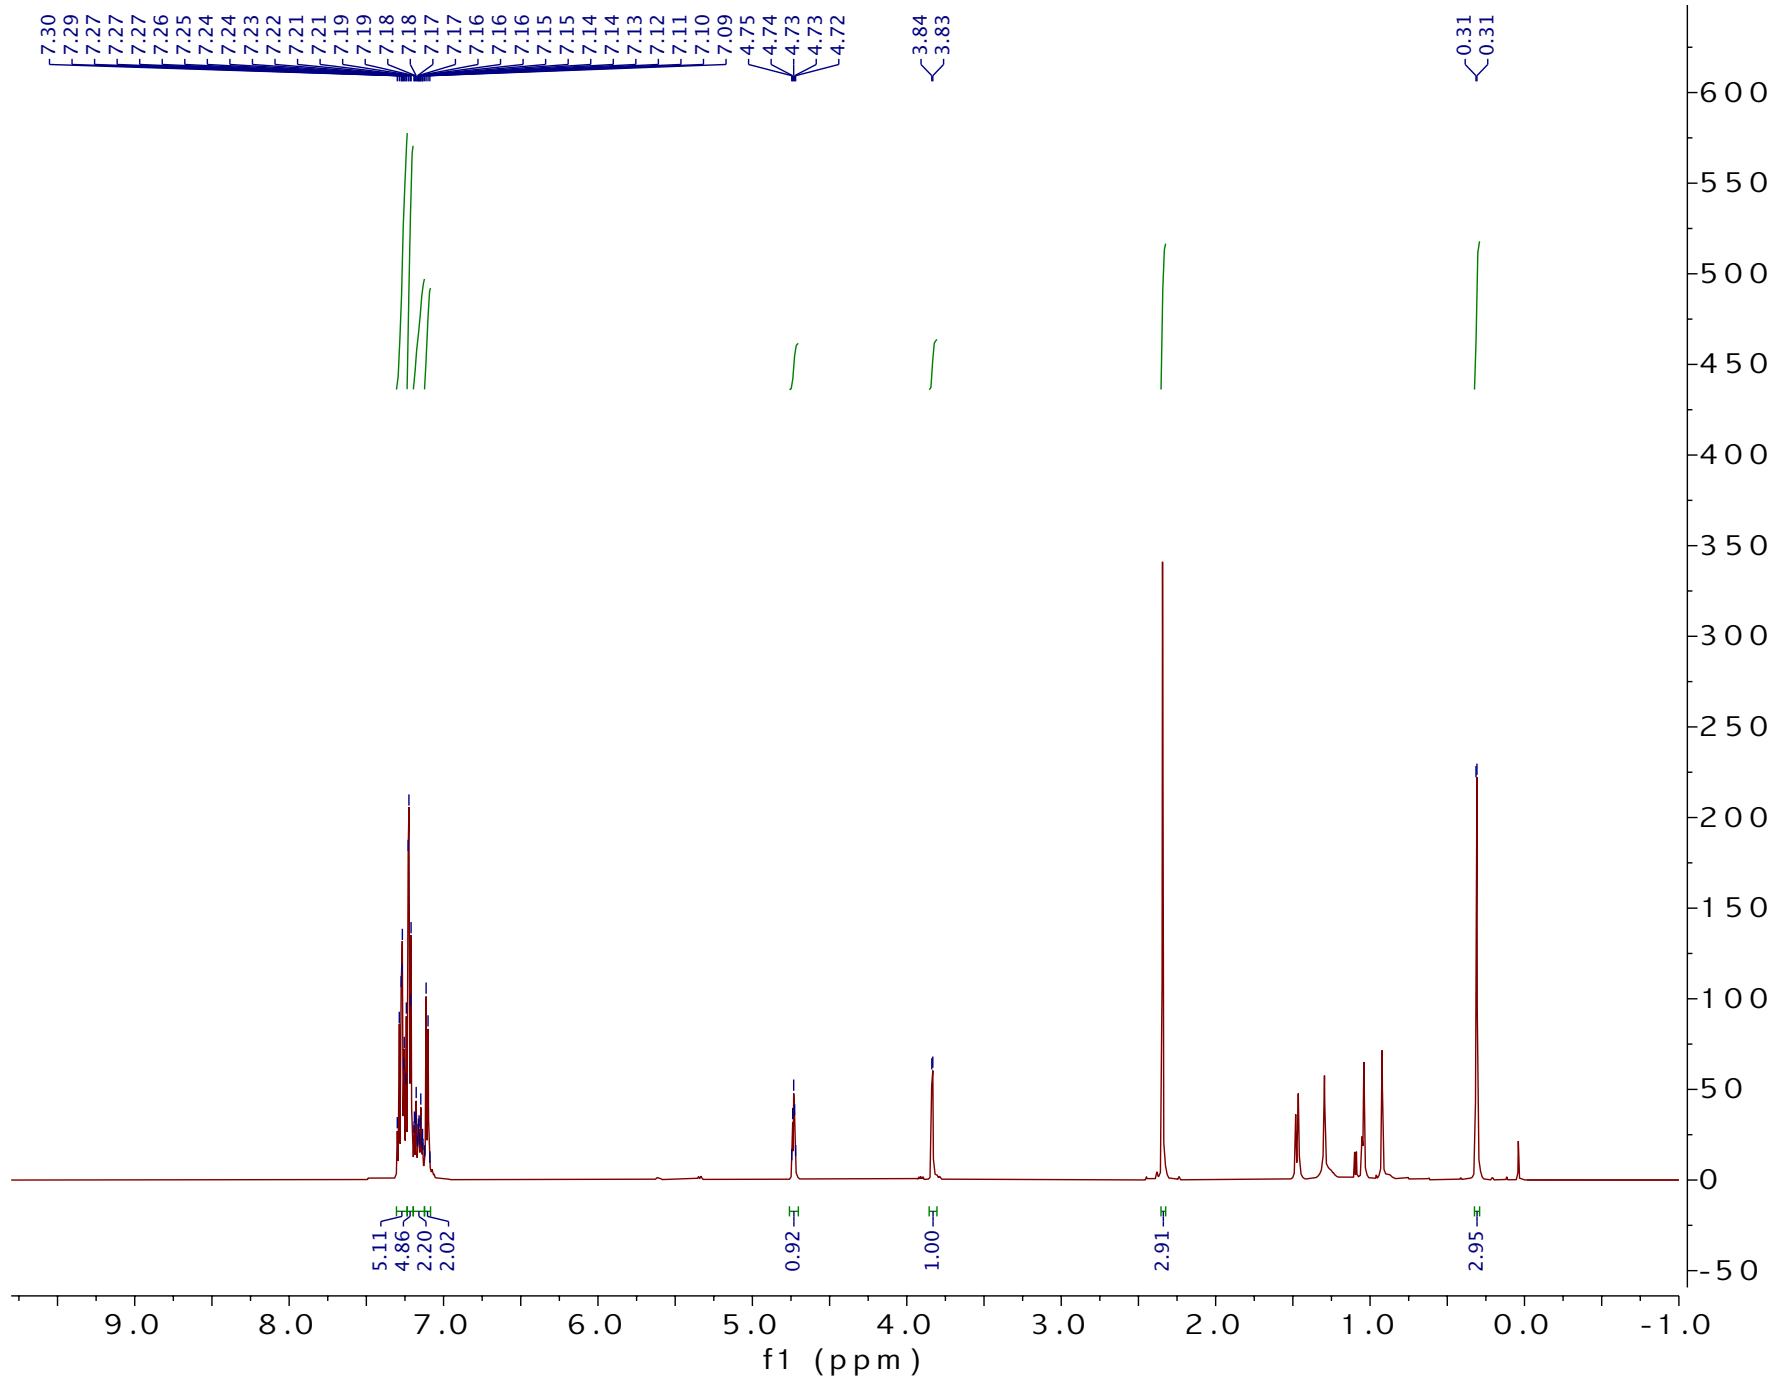

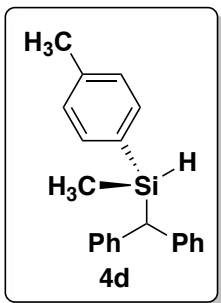

$^{13}\text{C}$ , 151 MHz,  $\text{CDCl}_3$

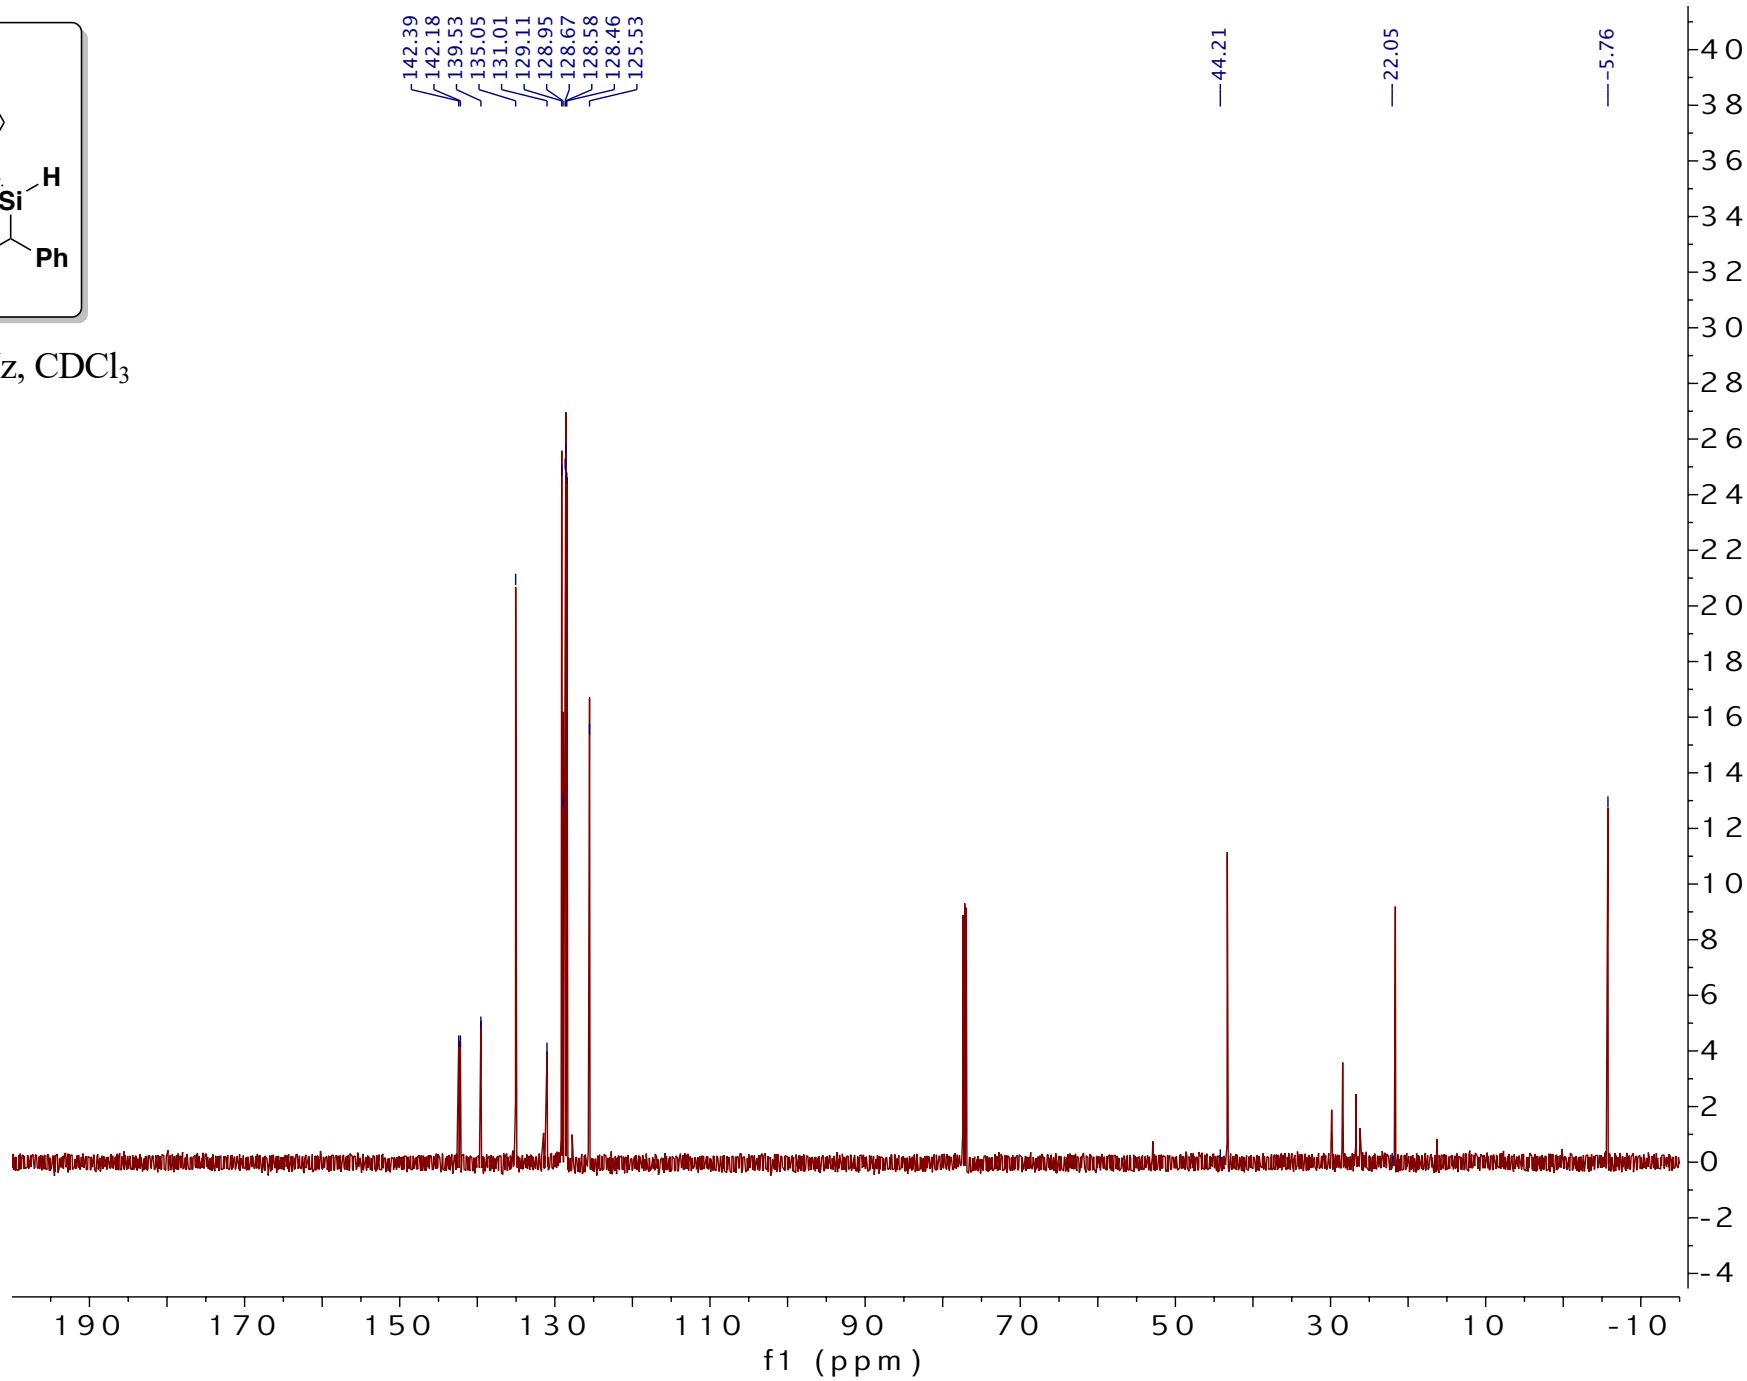

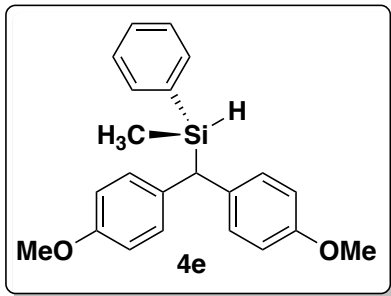

$^1\text{H}$ , 600 MHz,  $\text{C}_6\text{D}_6$

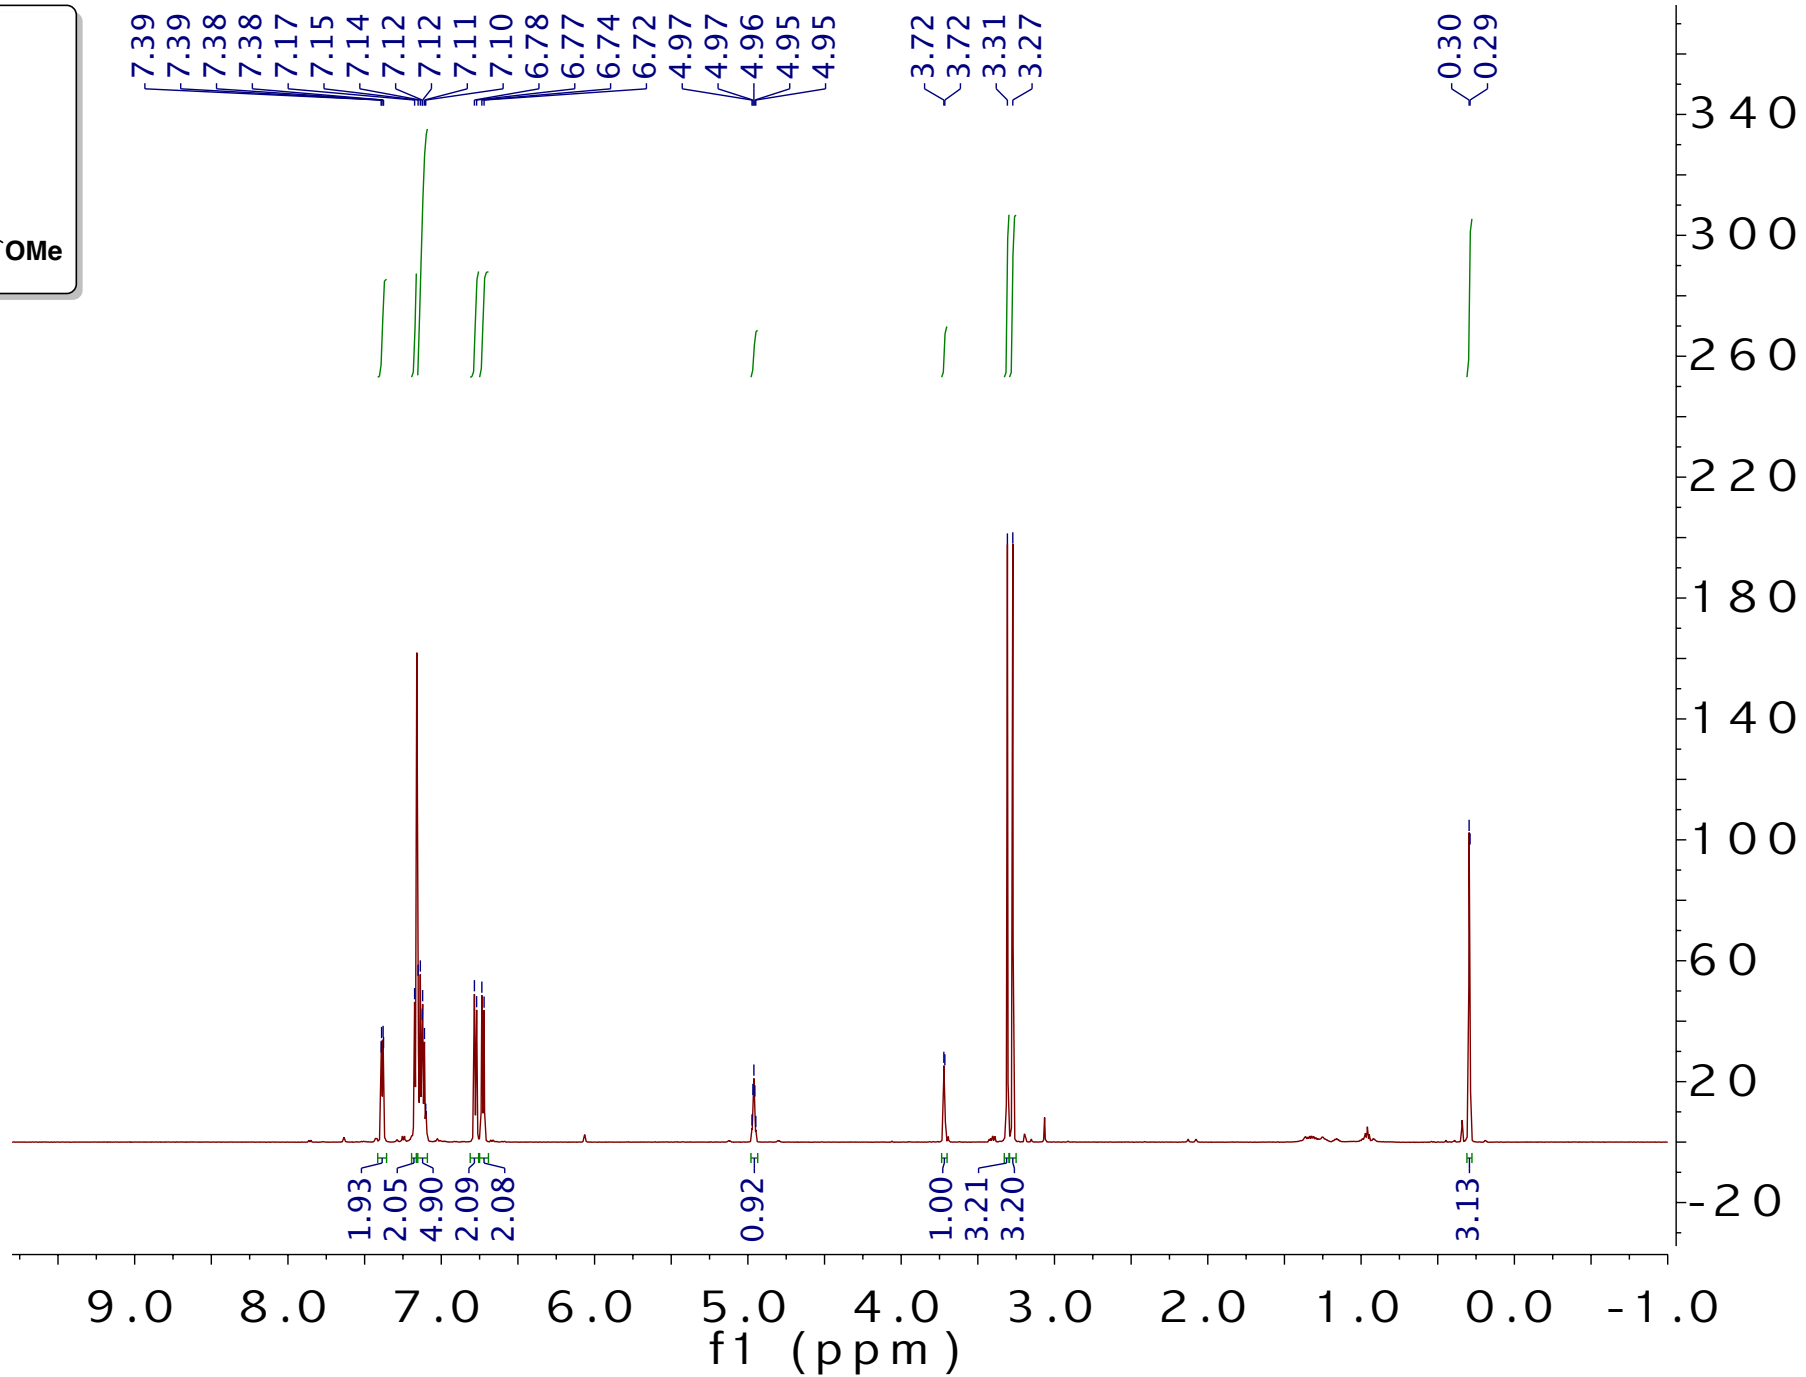

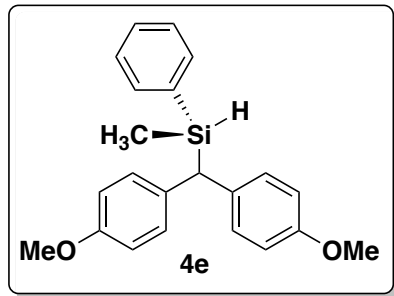

$^{13}\text{C}$ , 100 MHz,  $\text{CDCl}_3$

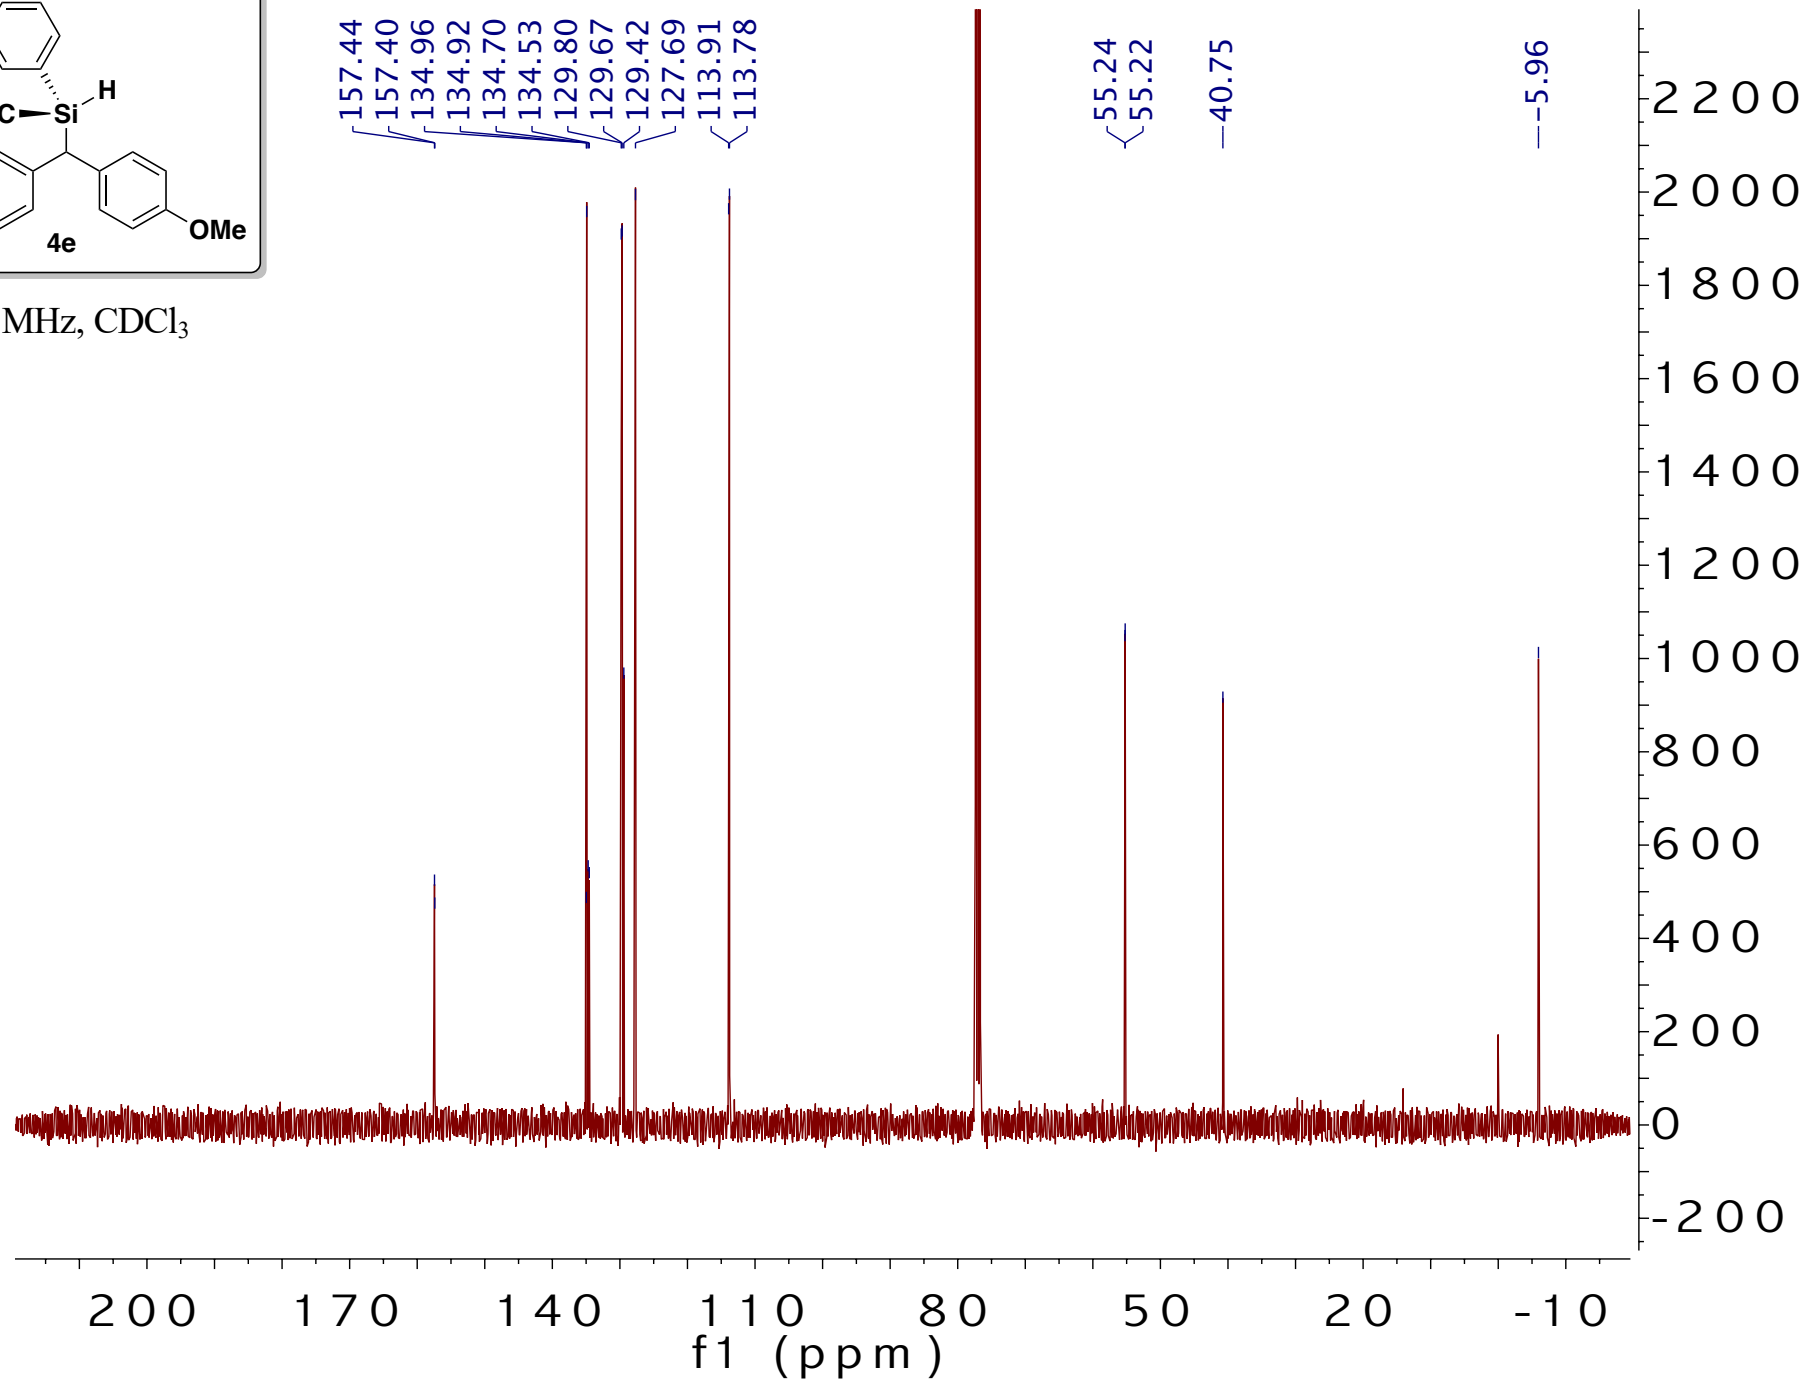

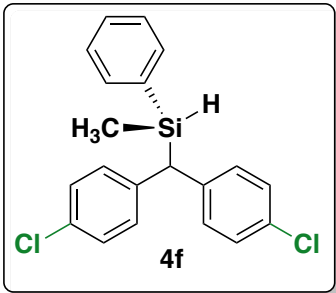

$^1\text{H}$ , 600 MHz,  $\text{CDCl}_3$

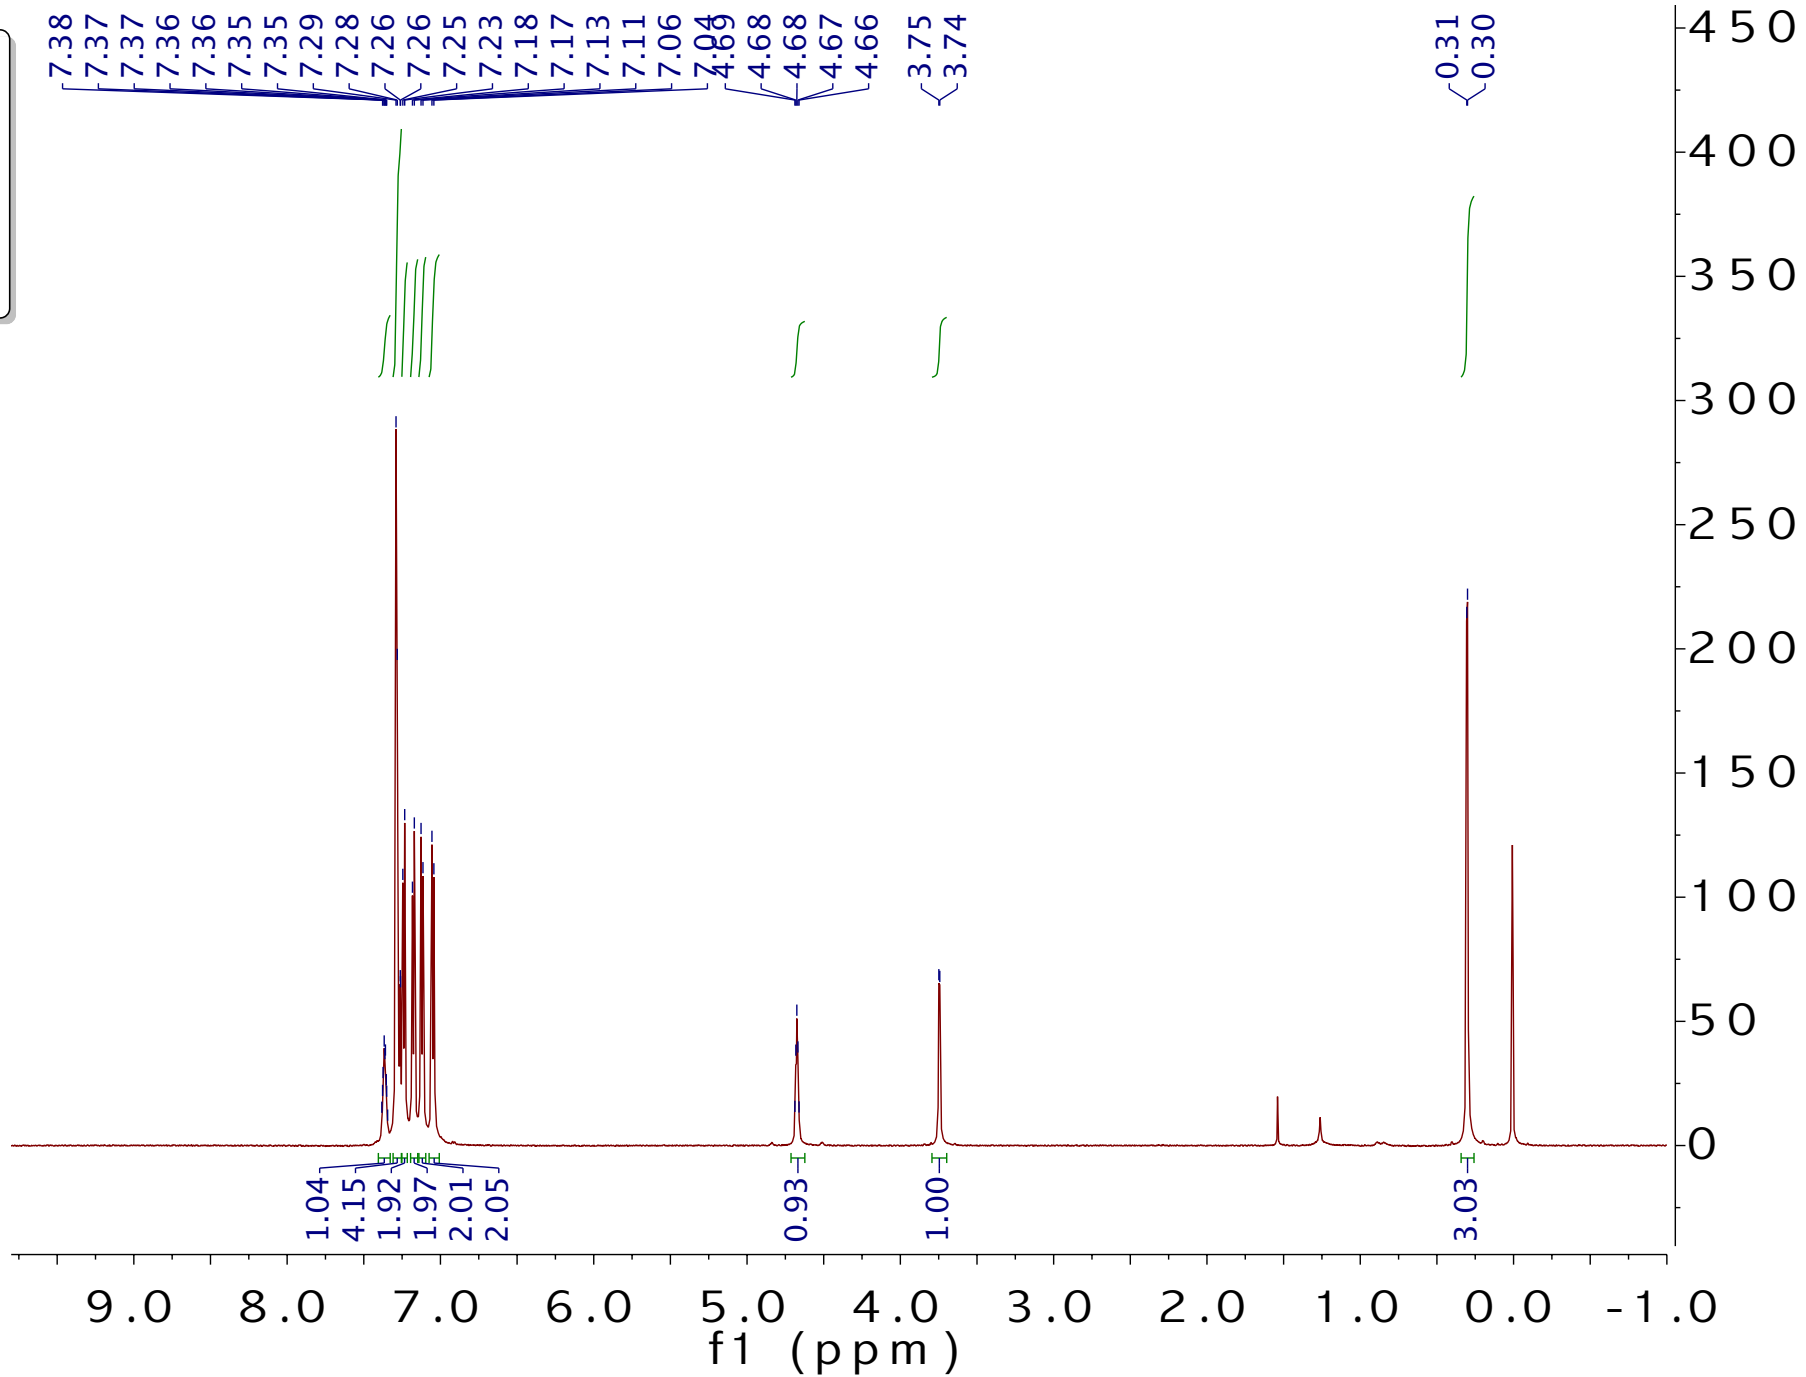





$^{13}\text{C}$ , 100 MHz,  $\text{CDCl}_3$

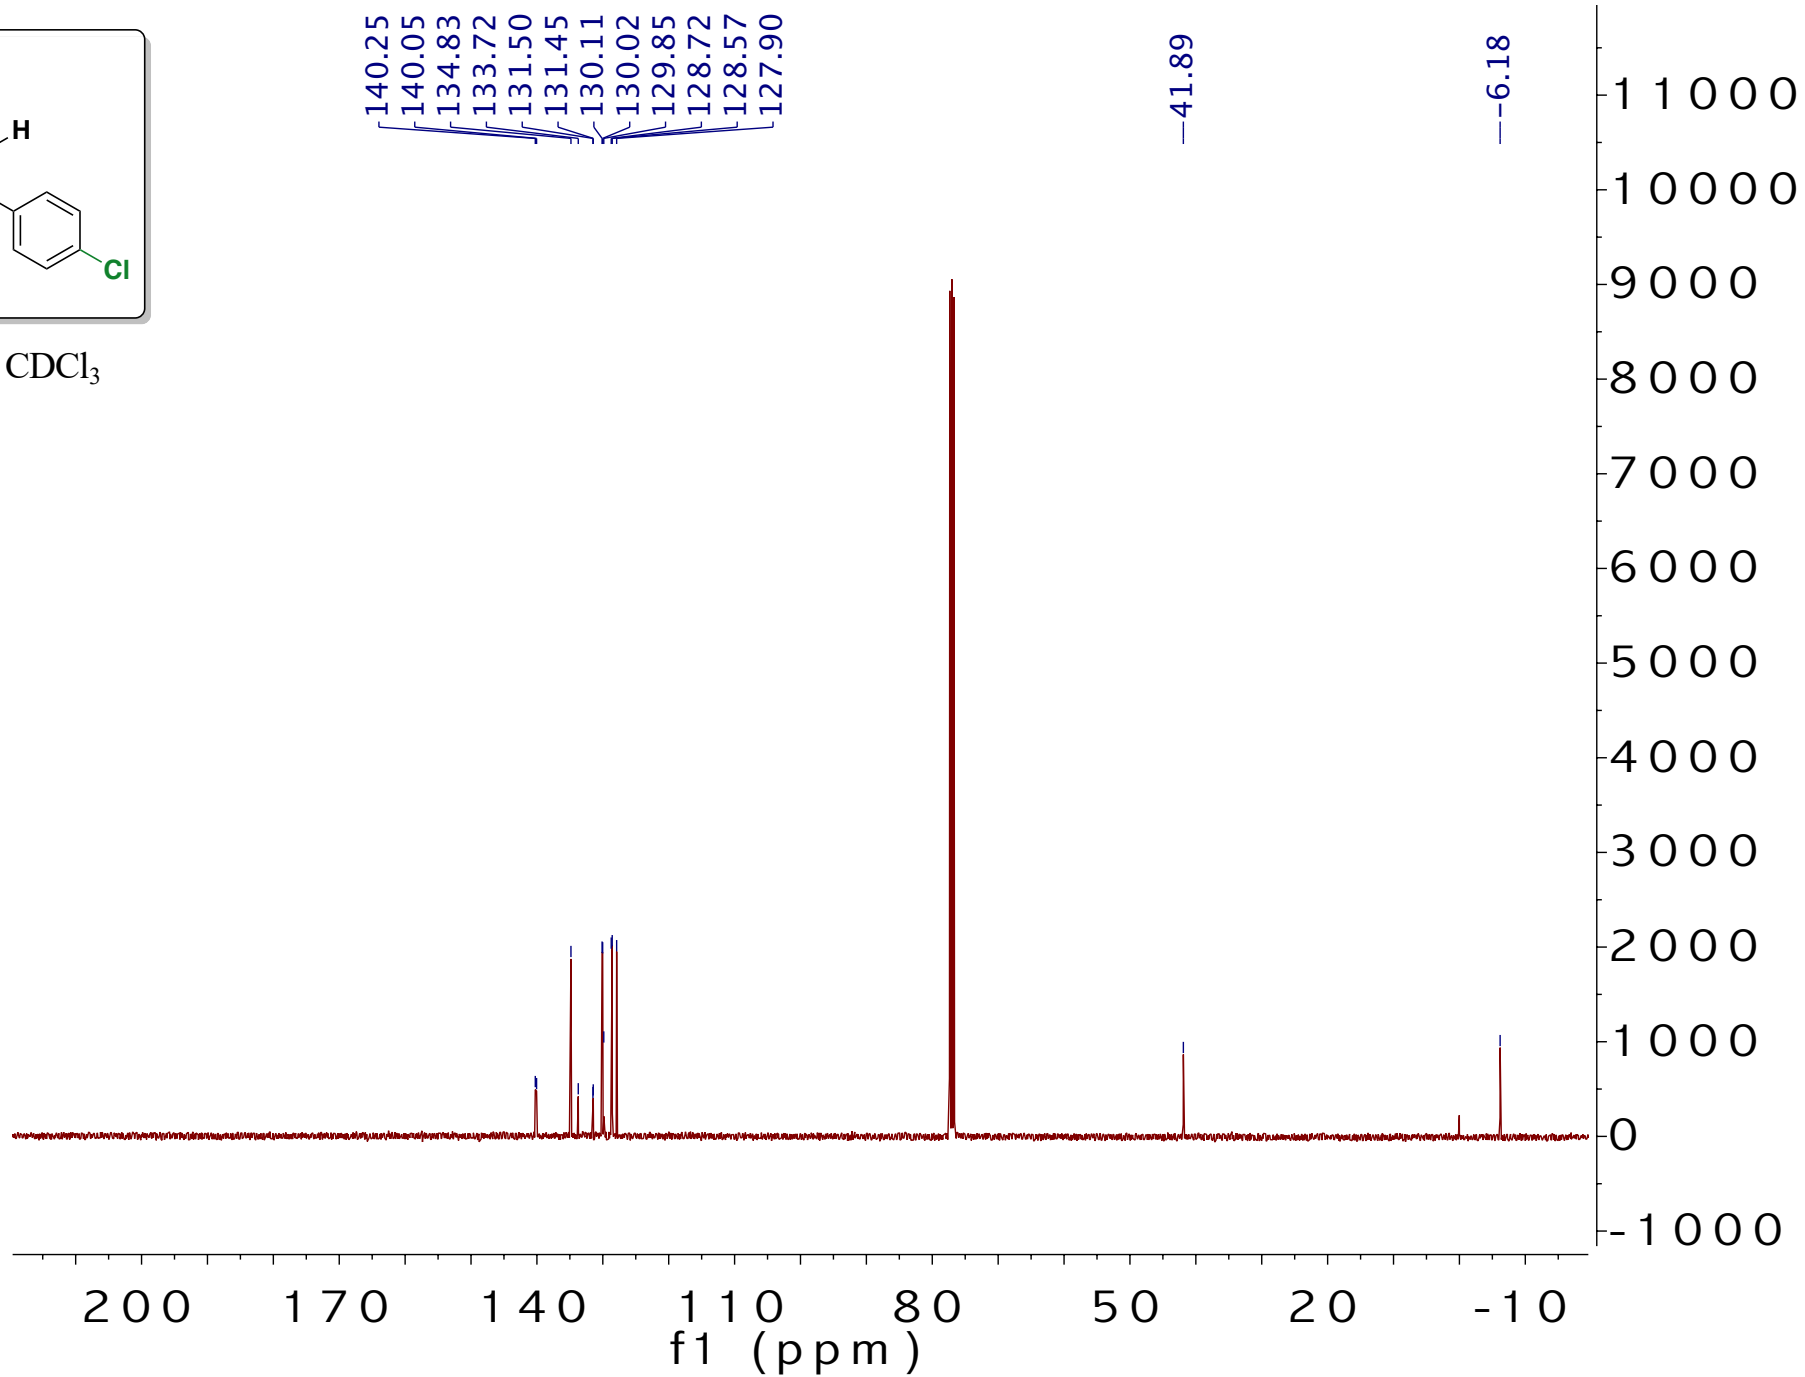

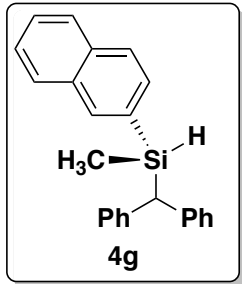

$^1\text{H}$ , 600 MHz,  $\text{C}_6\text{D}_6$

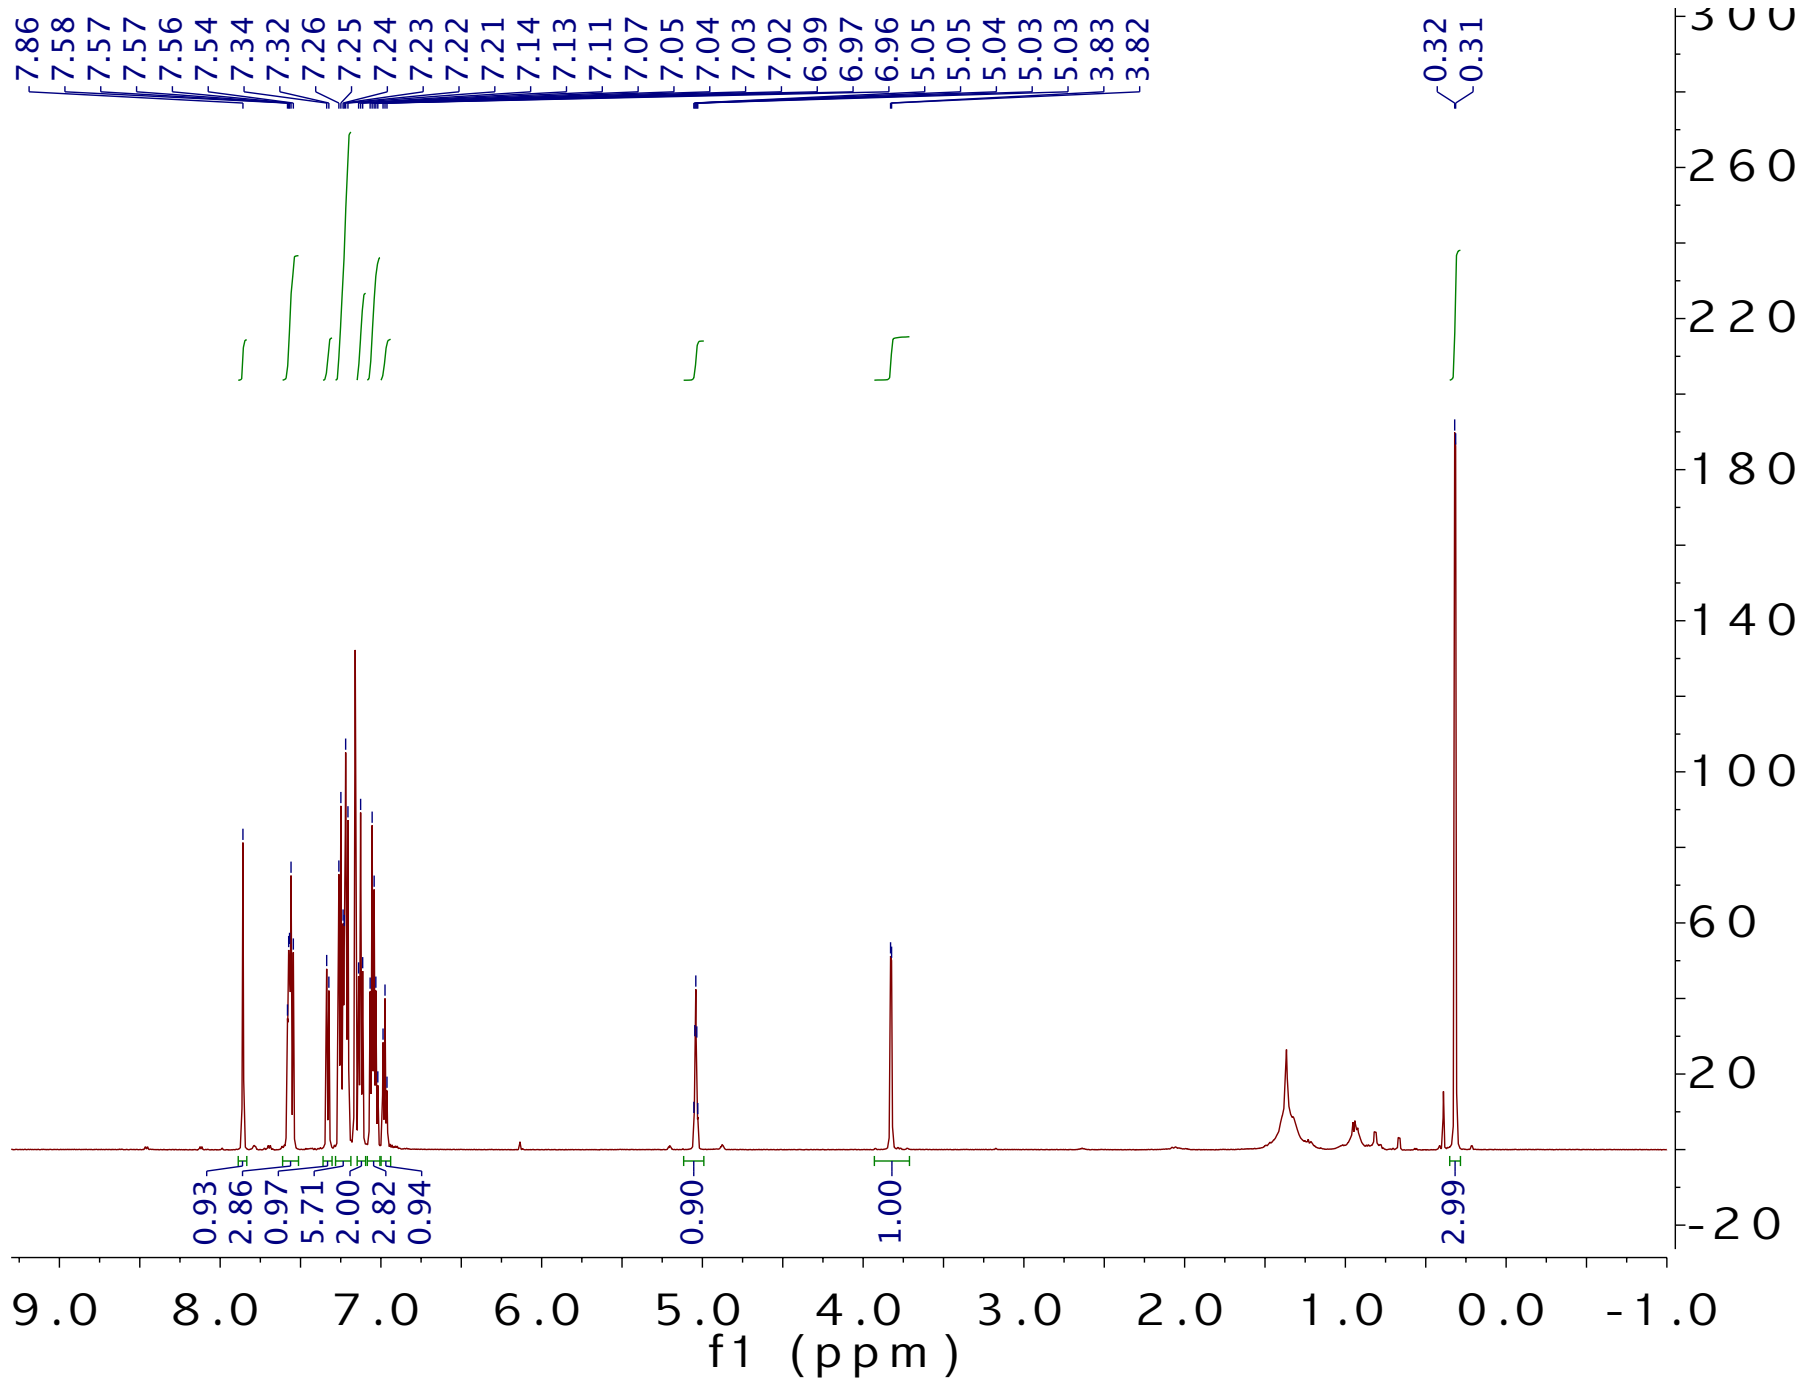

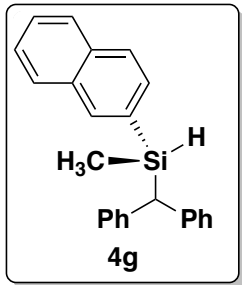

$^{13}\text{C}$ , 151 MHz,  $\text{CDCl}_3$

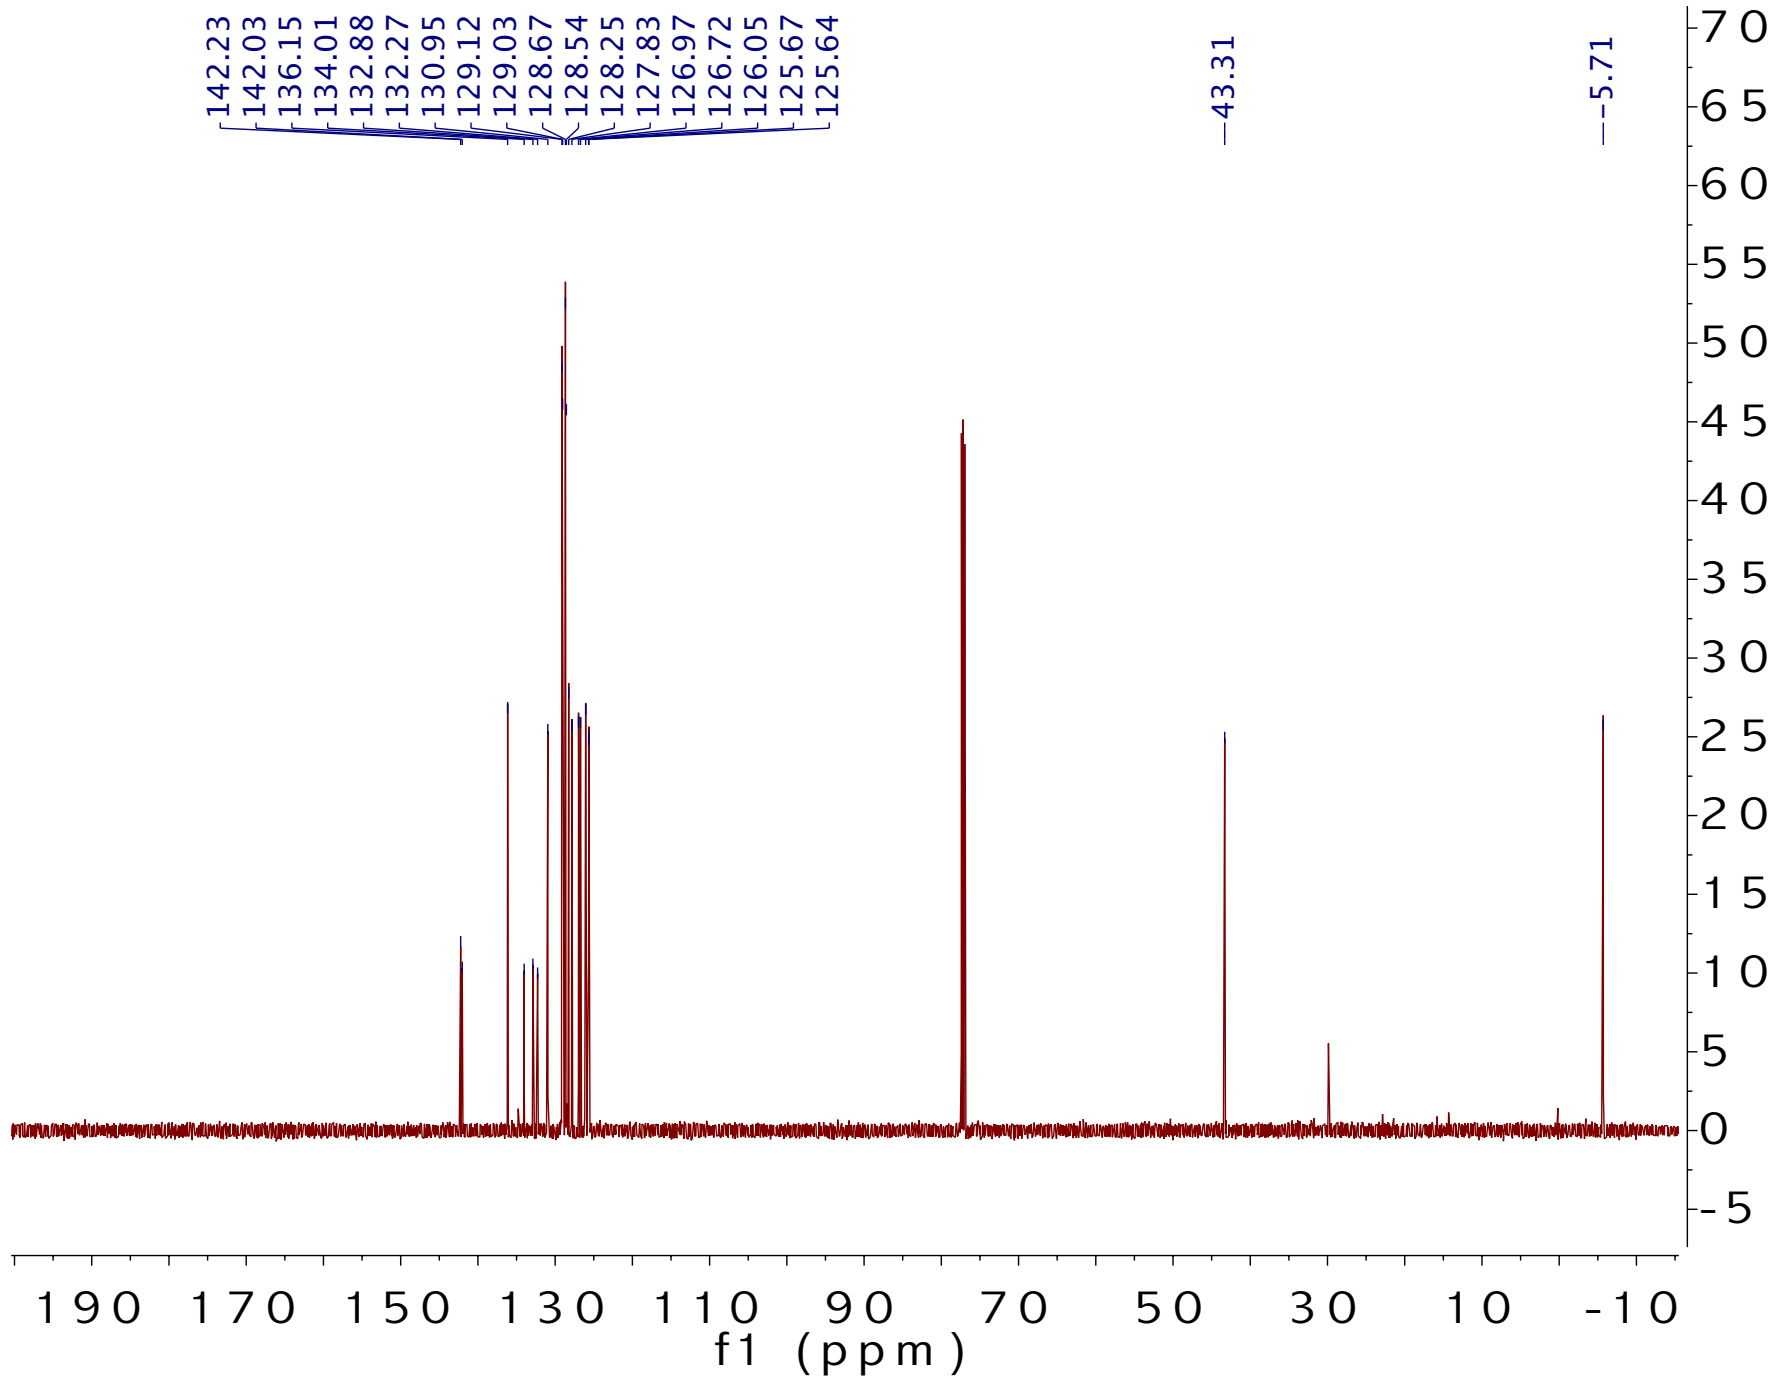

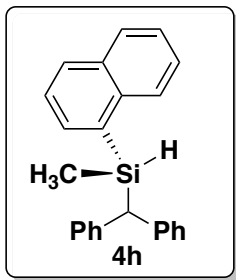

$^1\text{H}$ , 600 MHz,  $\text{C}_6\text{D}_6$

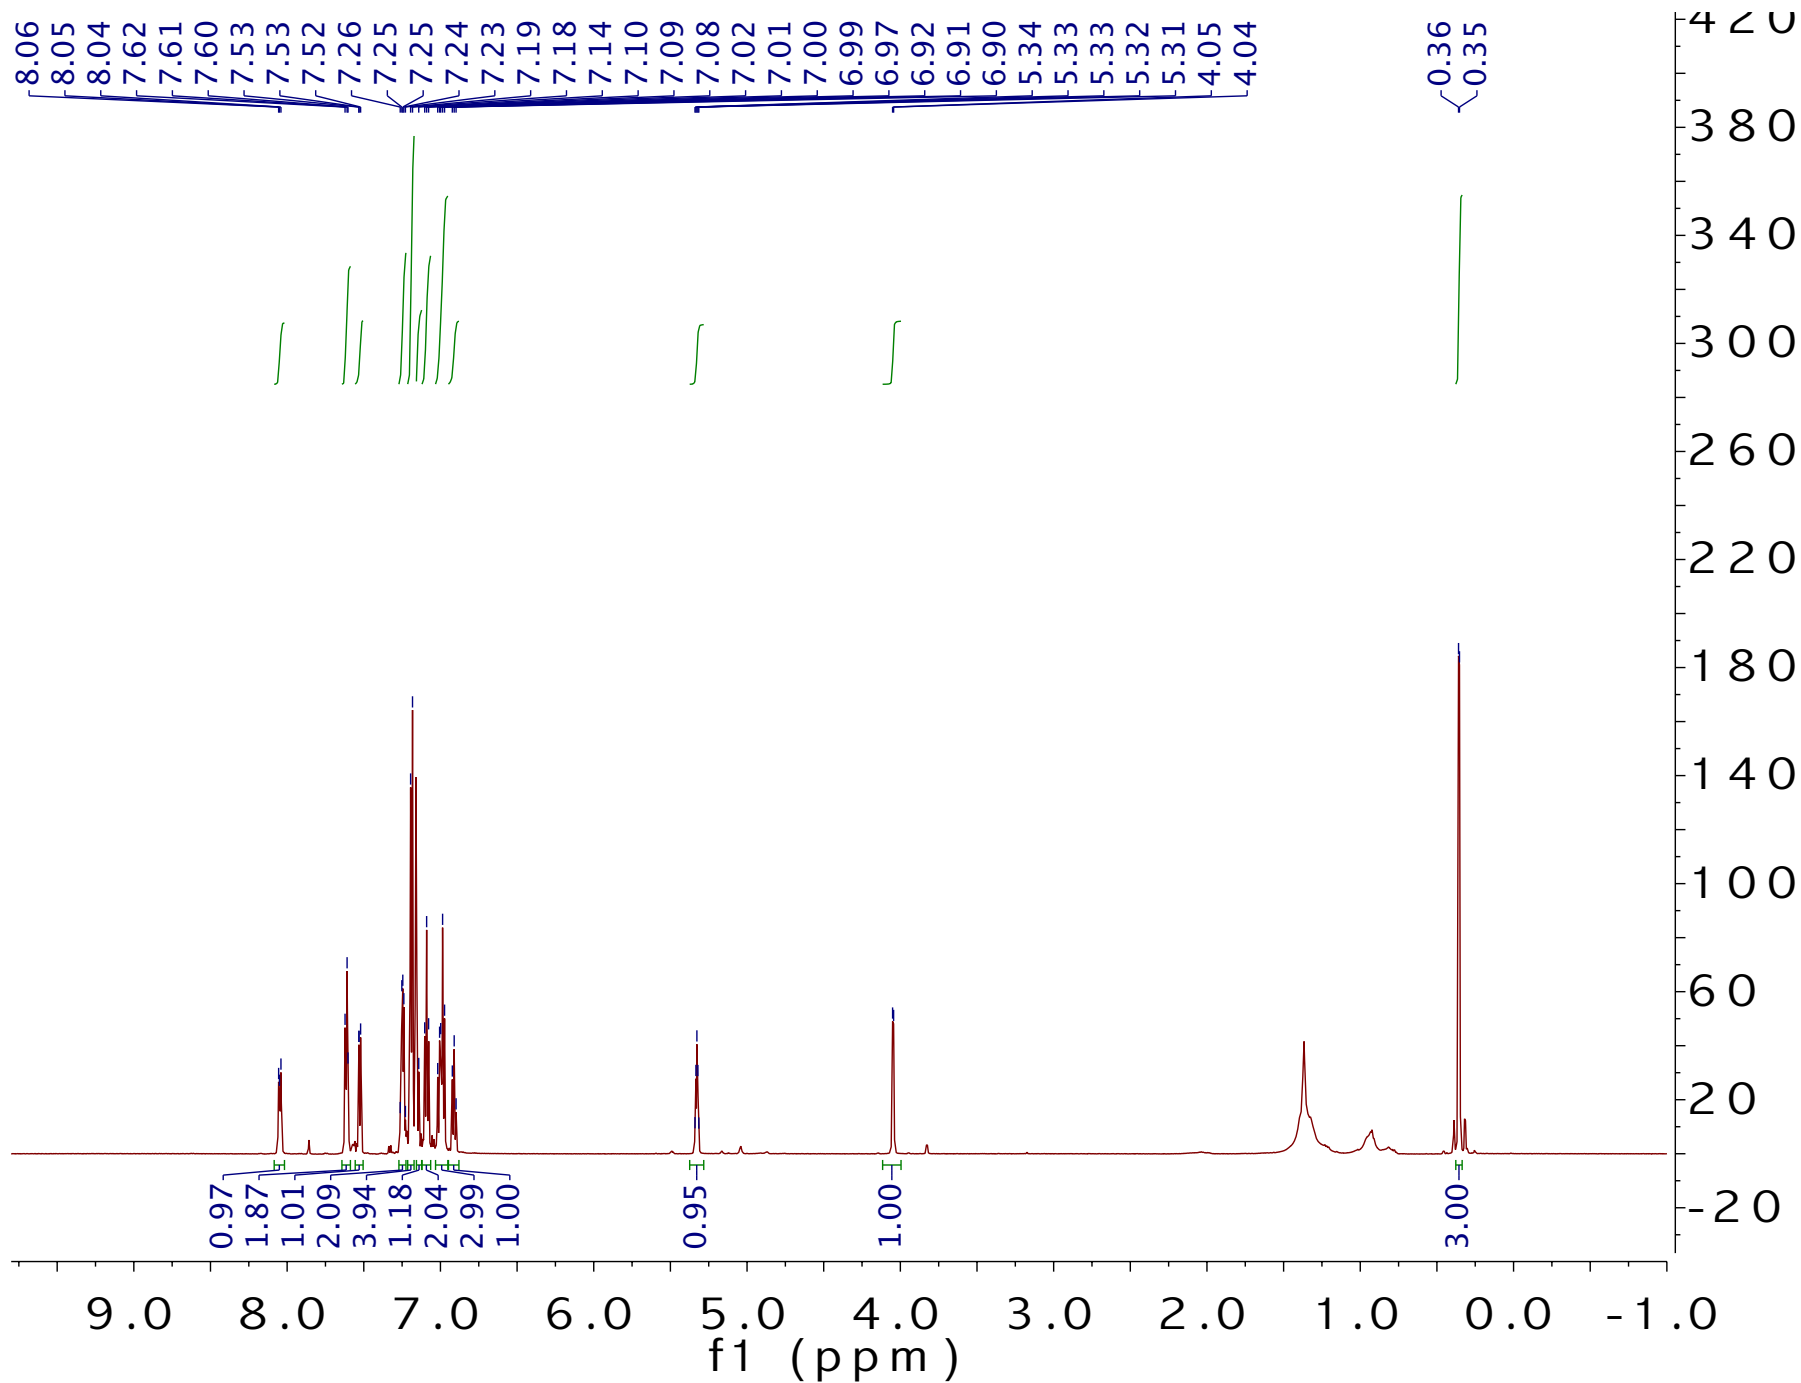

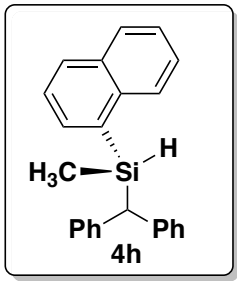

$^{13}\text{C}$ , 100 MHz,  $\text{CDCl}_3$

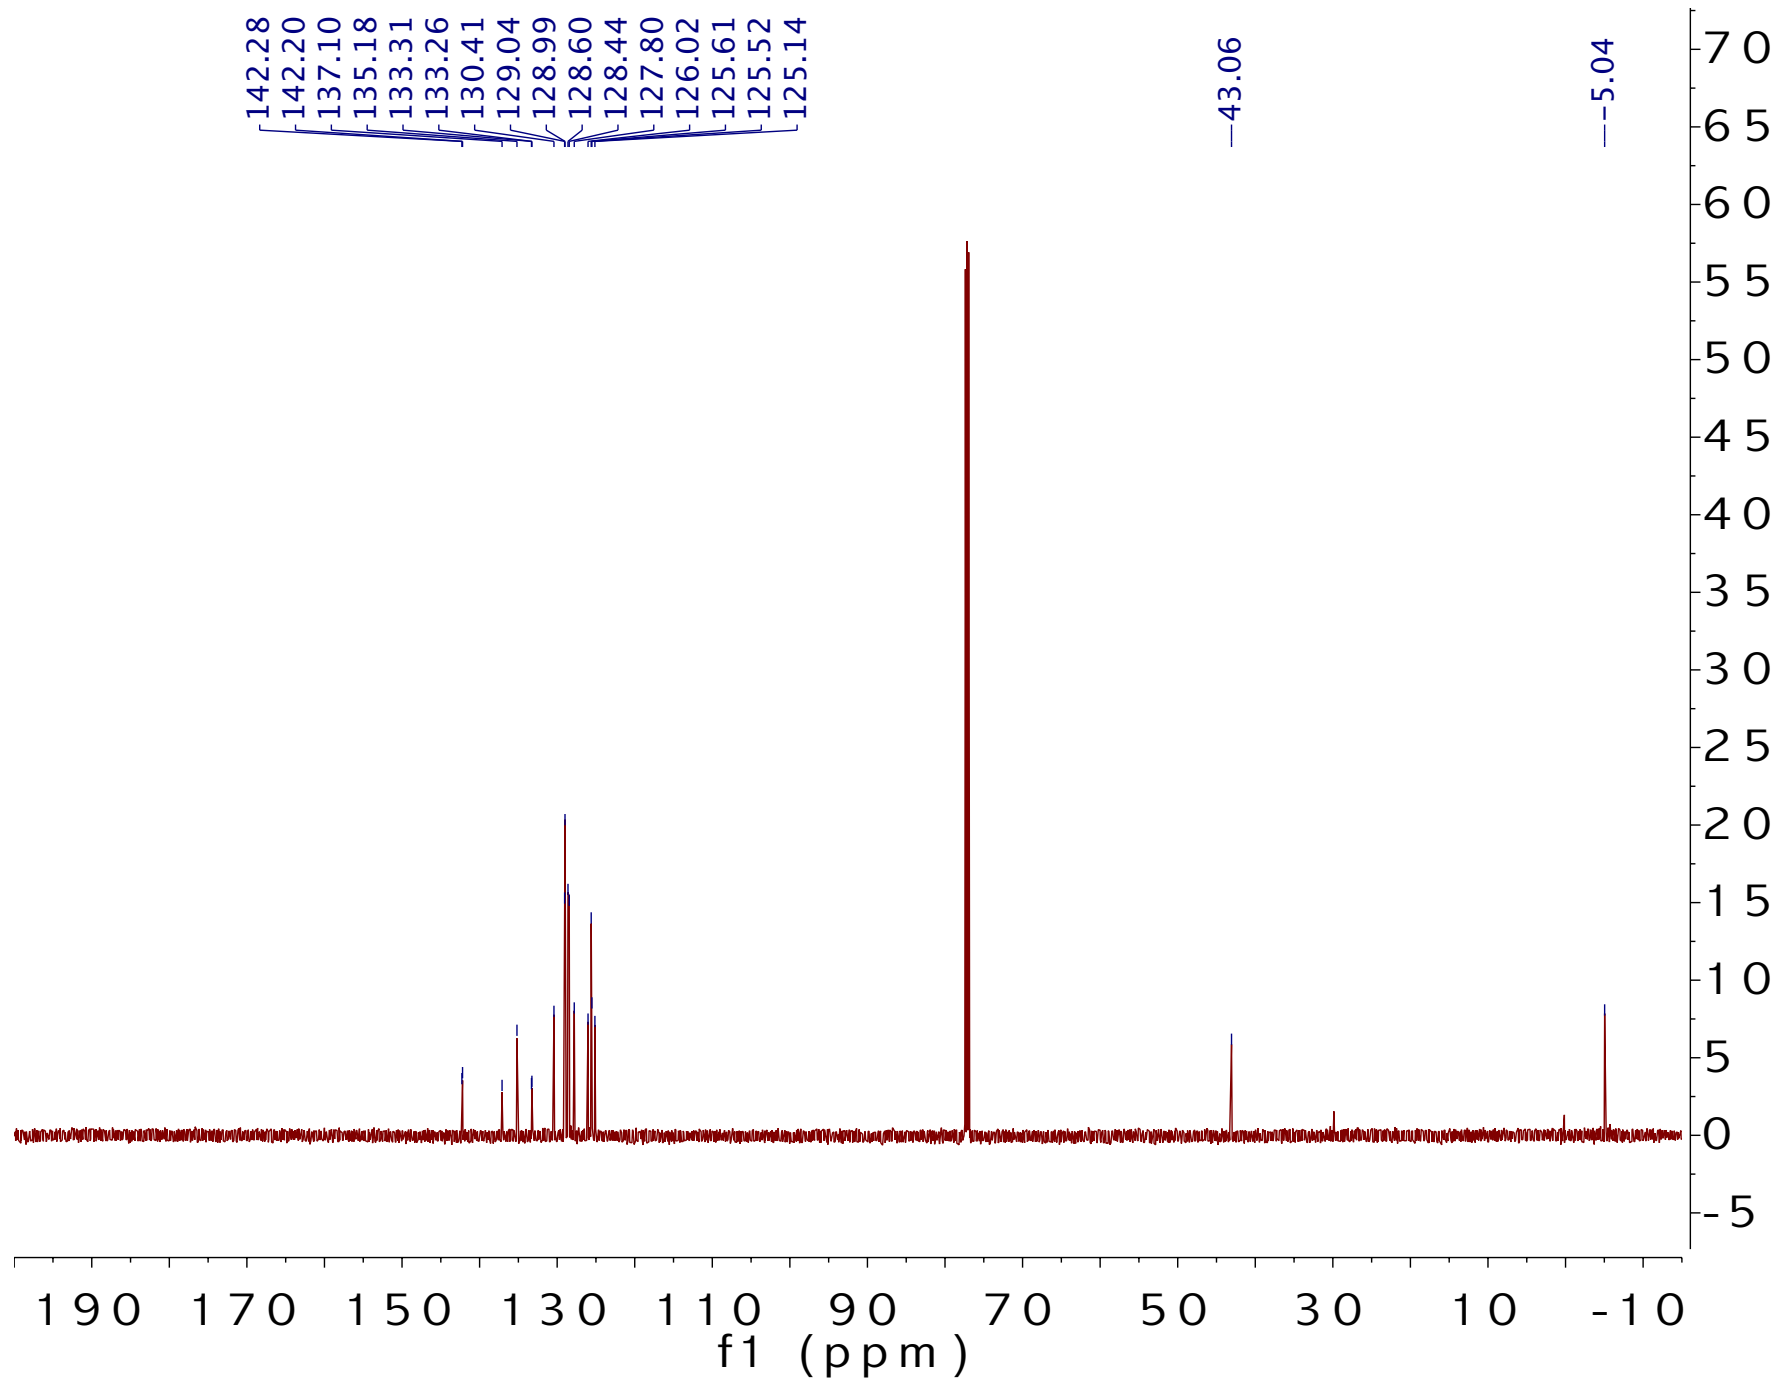

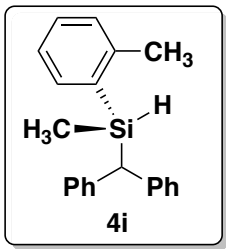

$^1\text{H}$ , 600 MHz,  $\text{CDCl}_3$

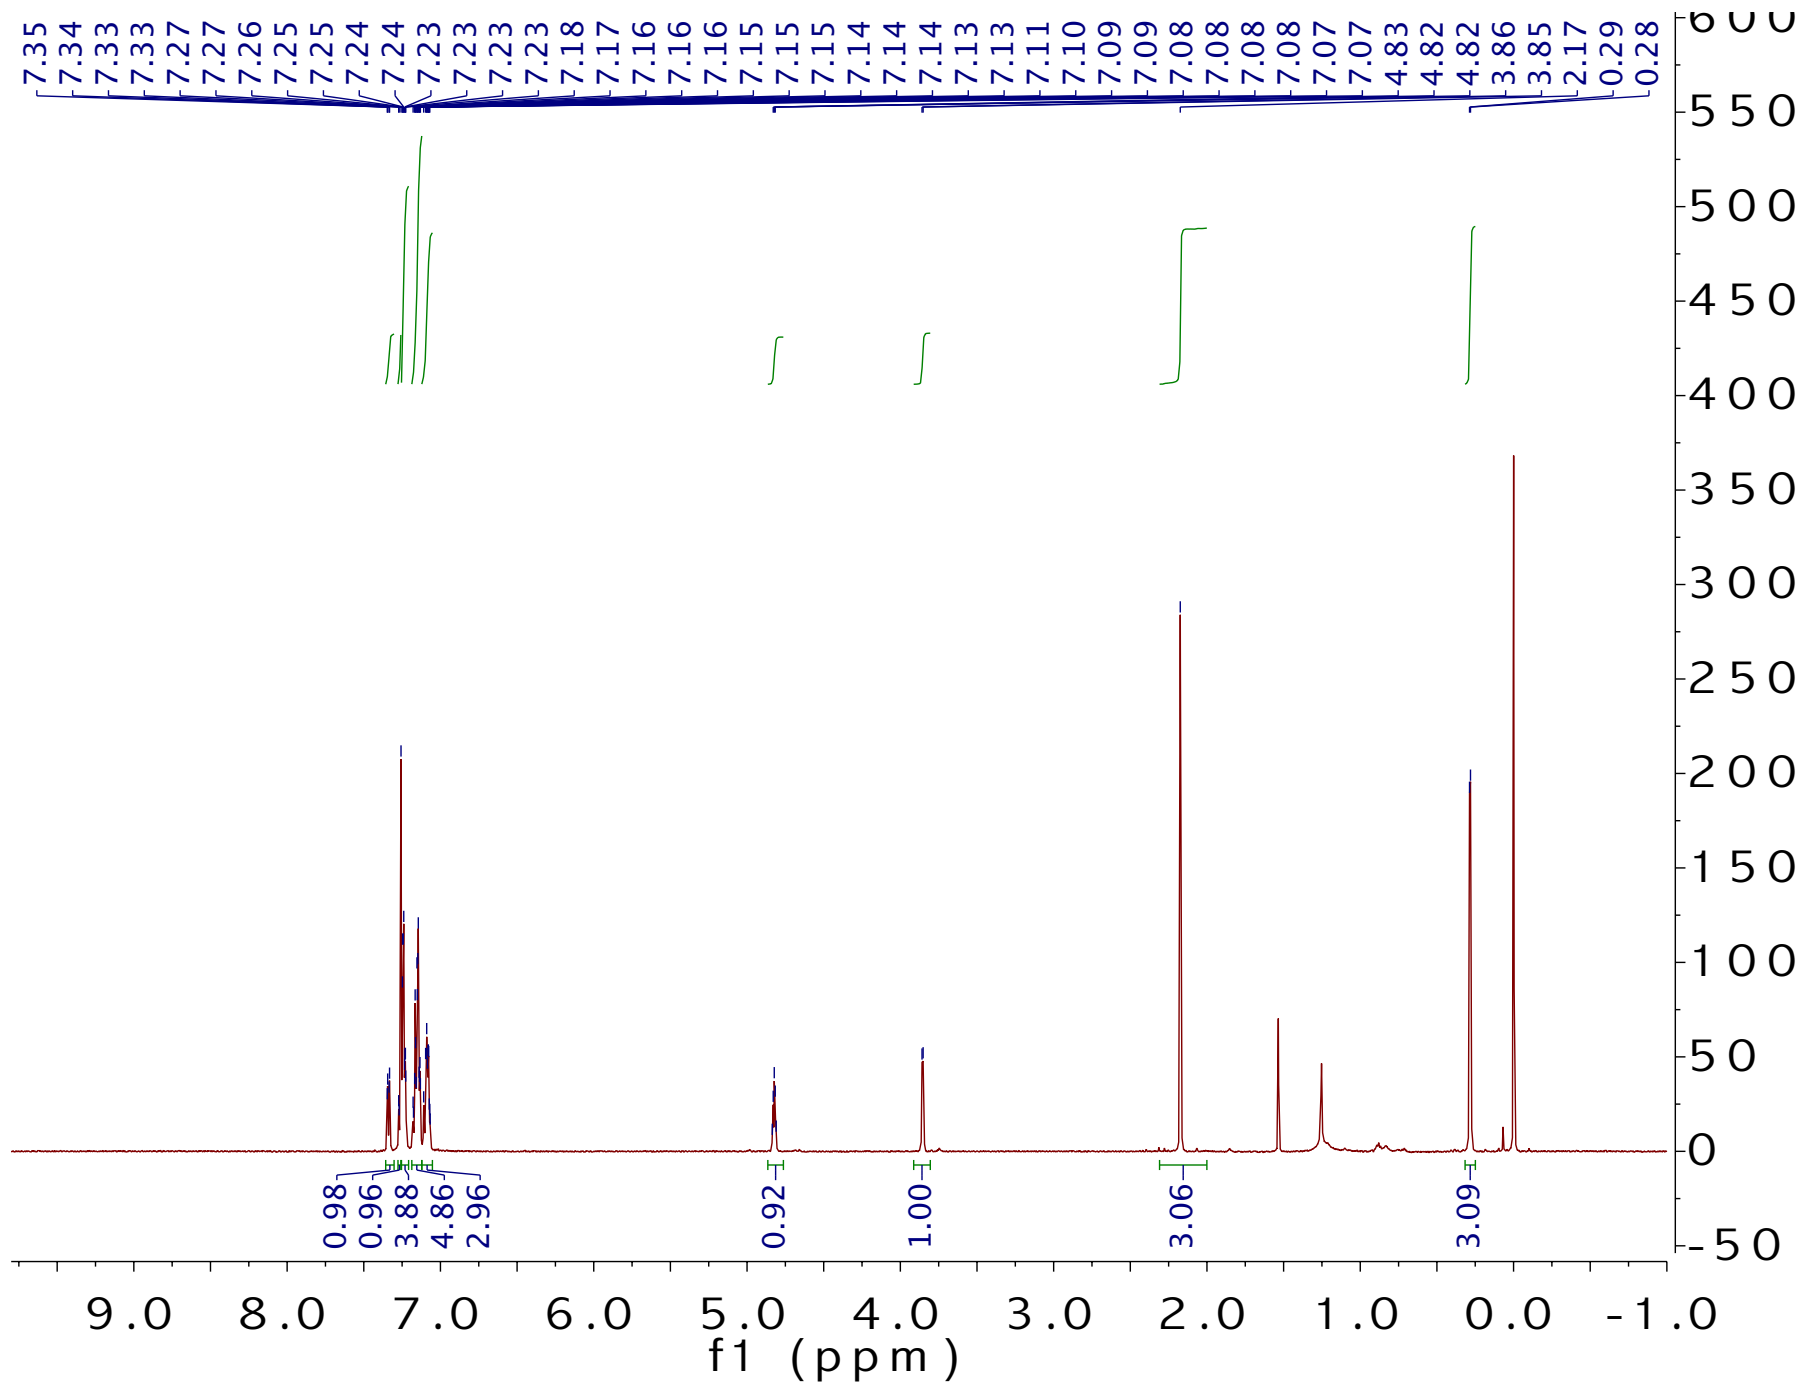

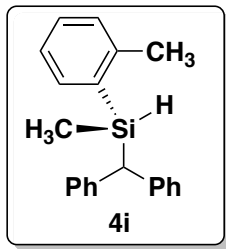

$^{13}\text{C}$ , 151 MHz,  $\text{CDCl}_3$

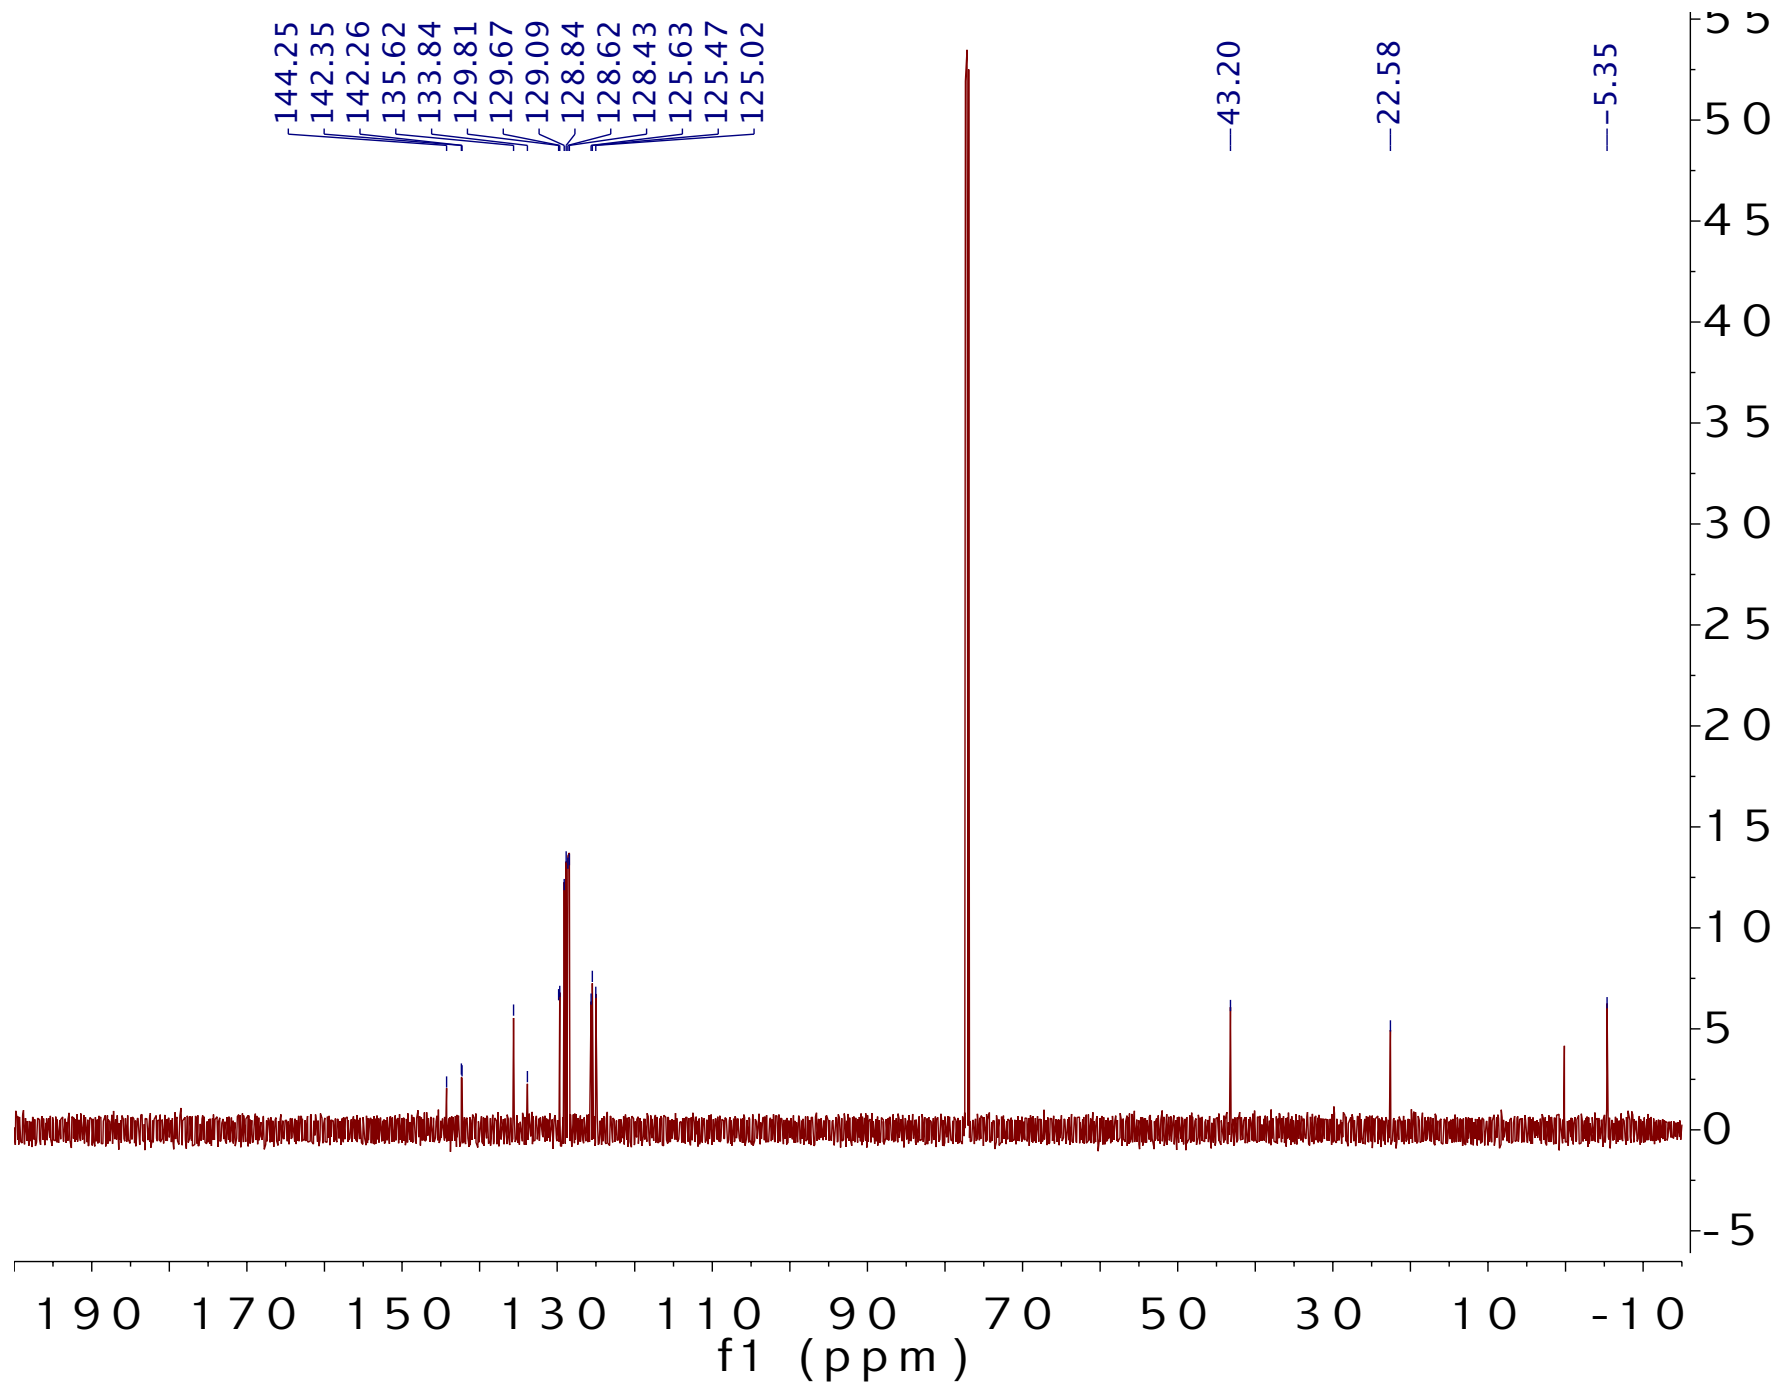

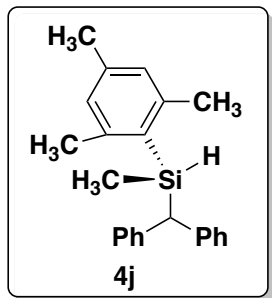

$^1\text{H}$ , 400 MHz  $\text{CDCl}_3$

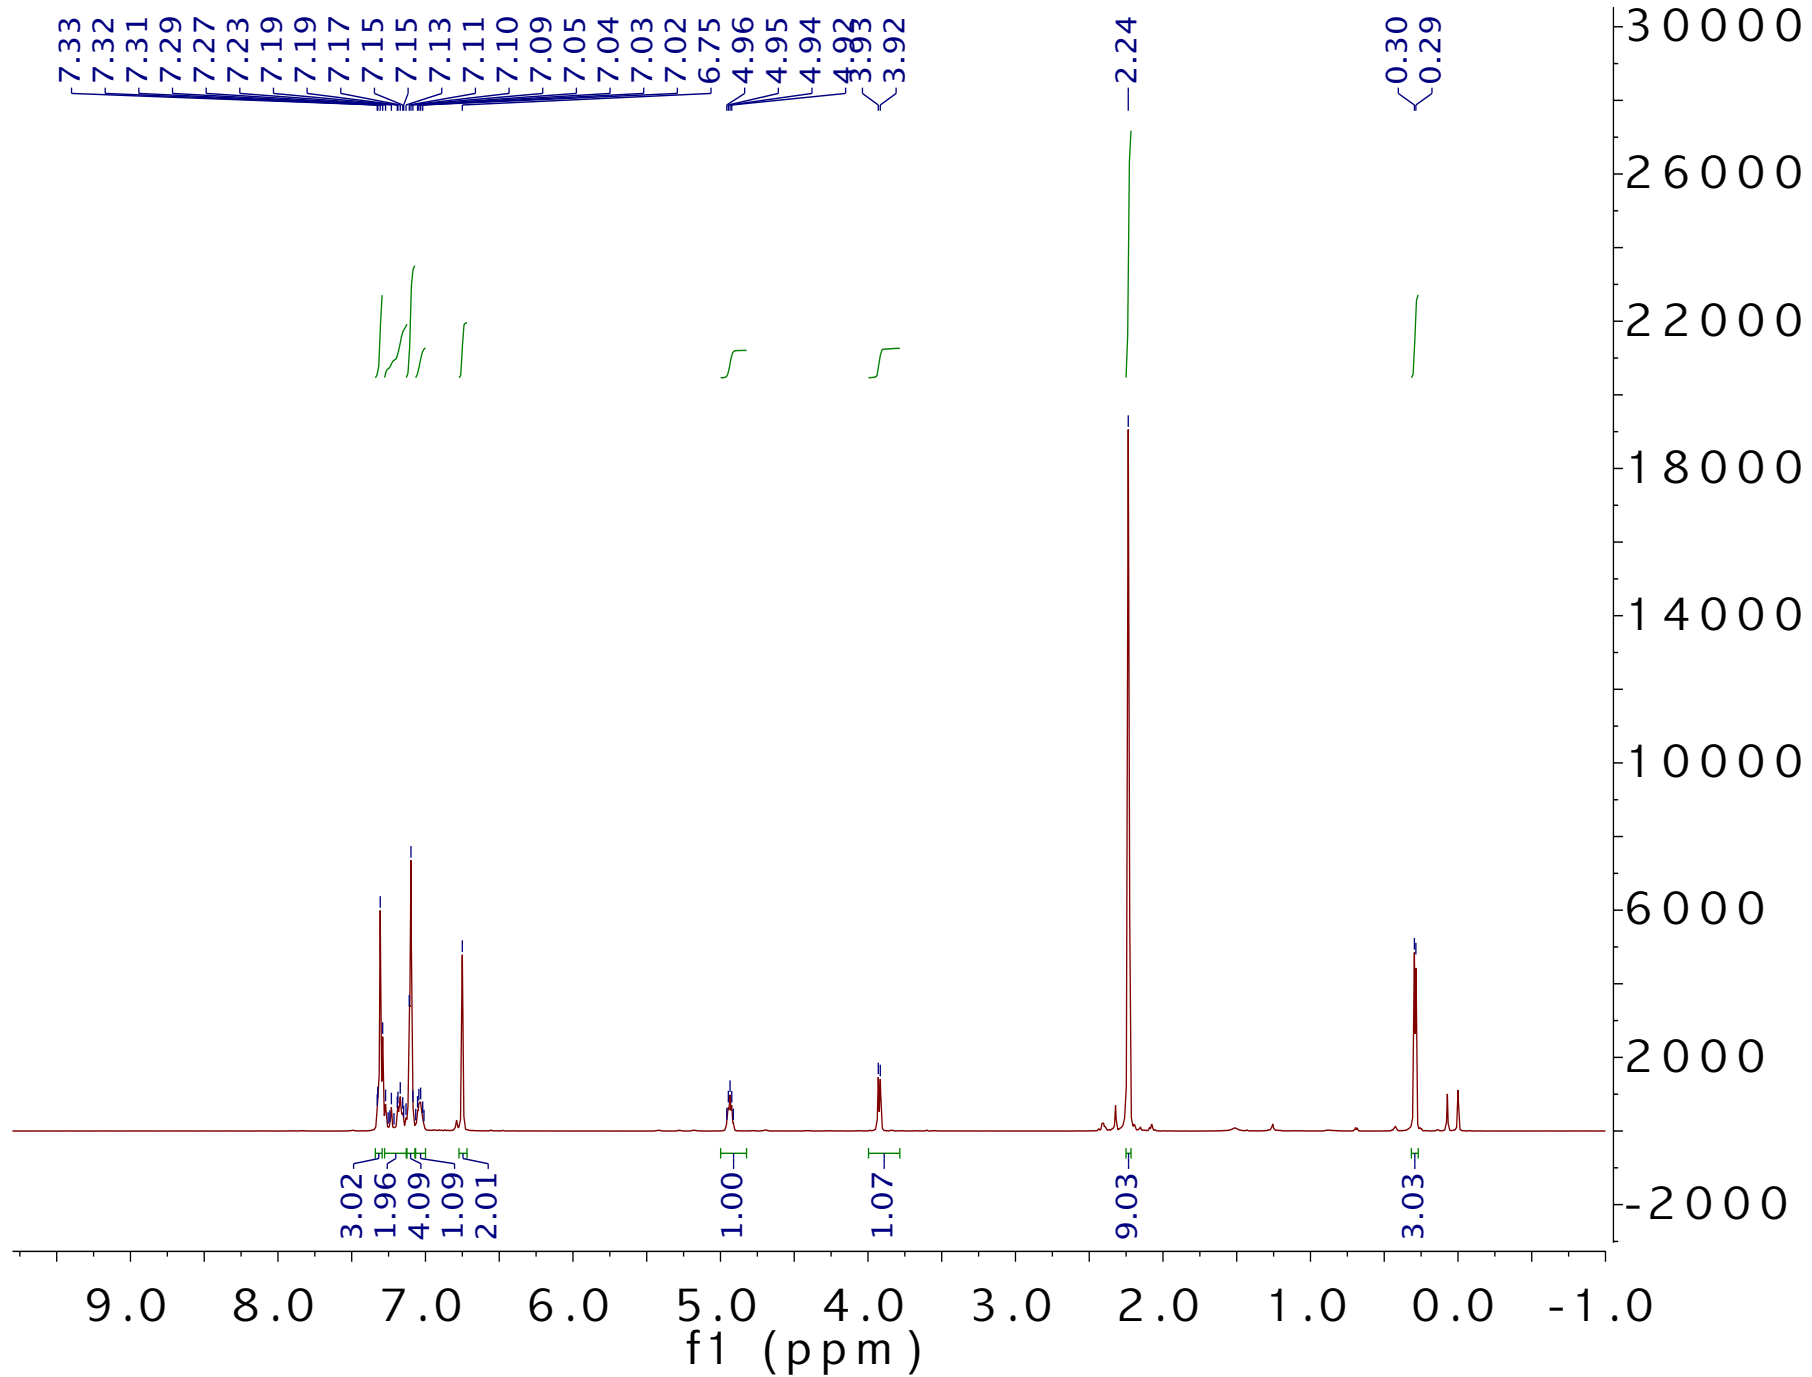



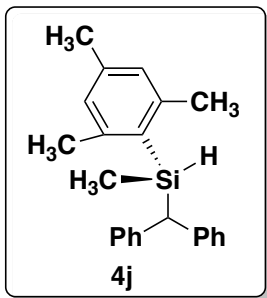

$^{13}\text{C}$ , 100 MHz,  $\text{CDCl}_3$

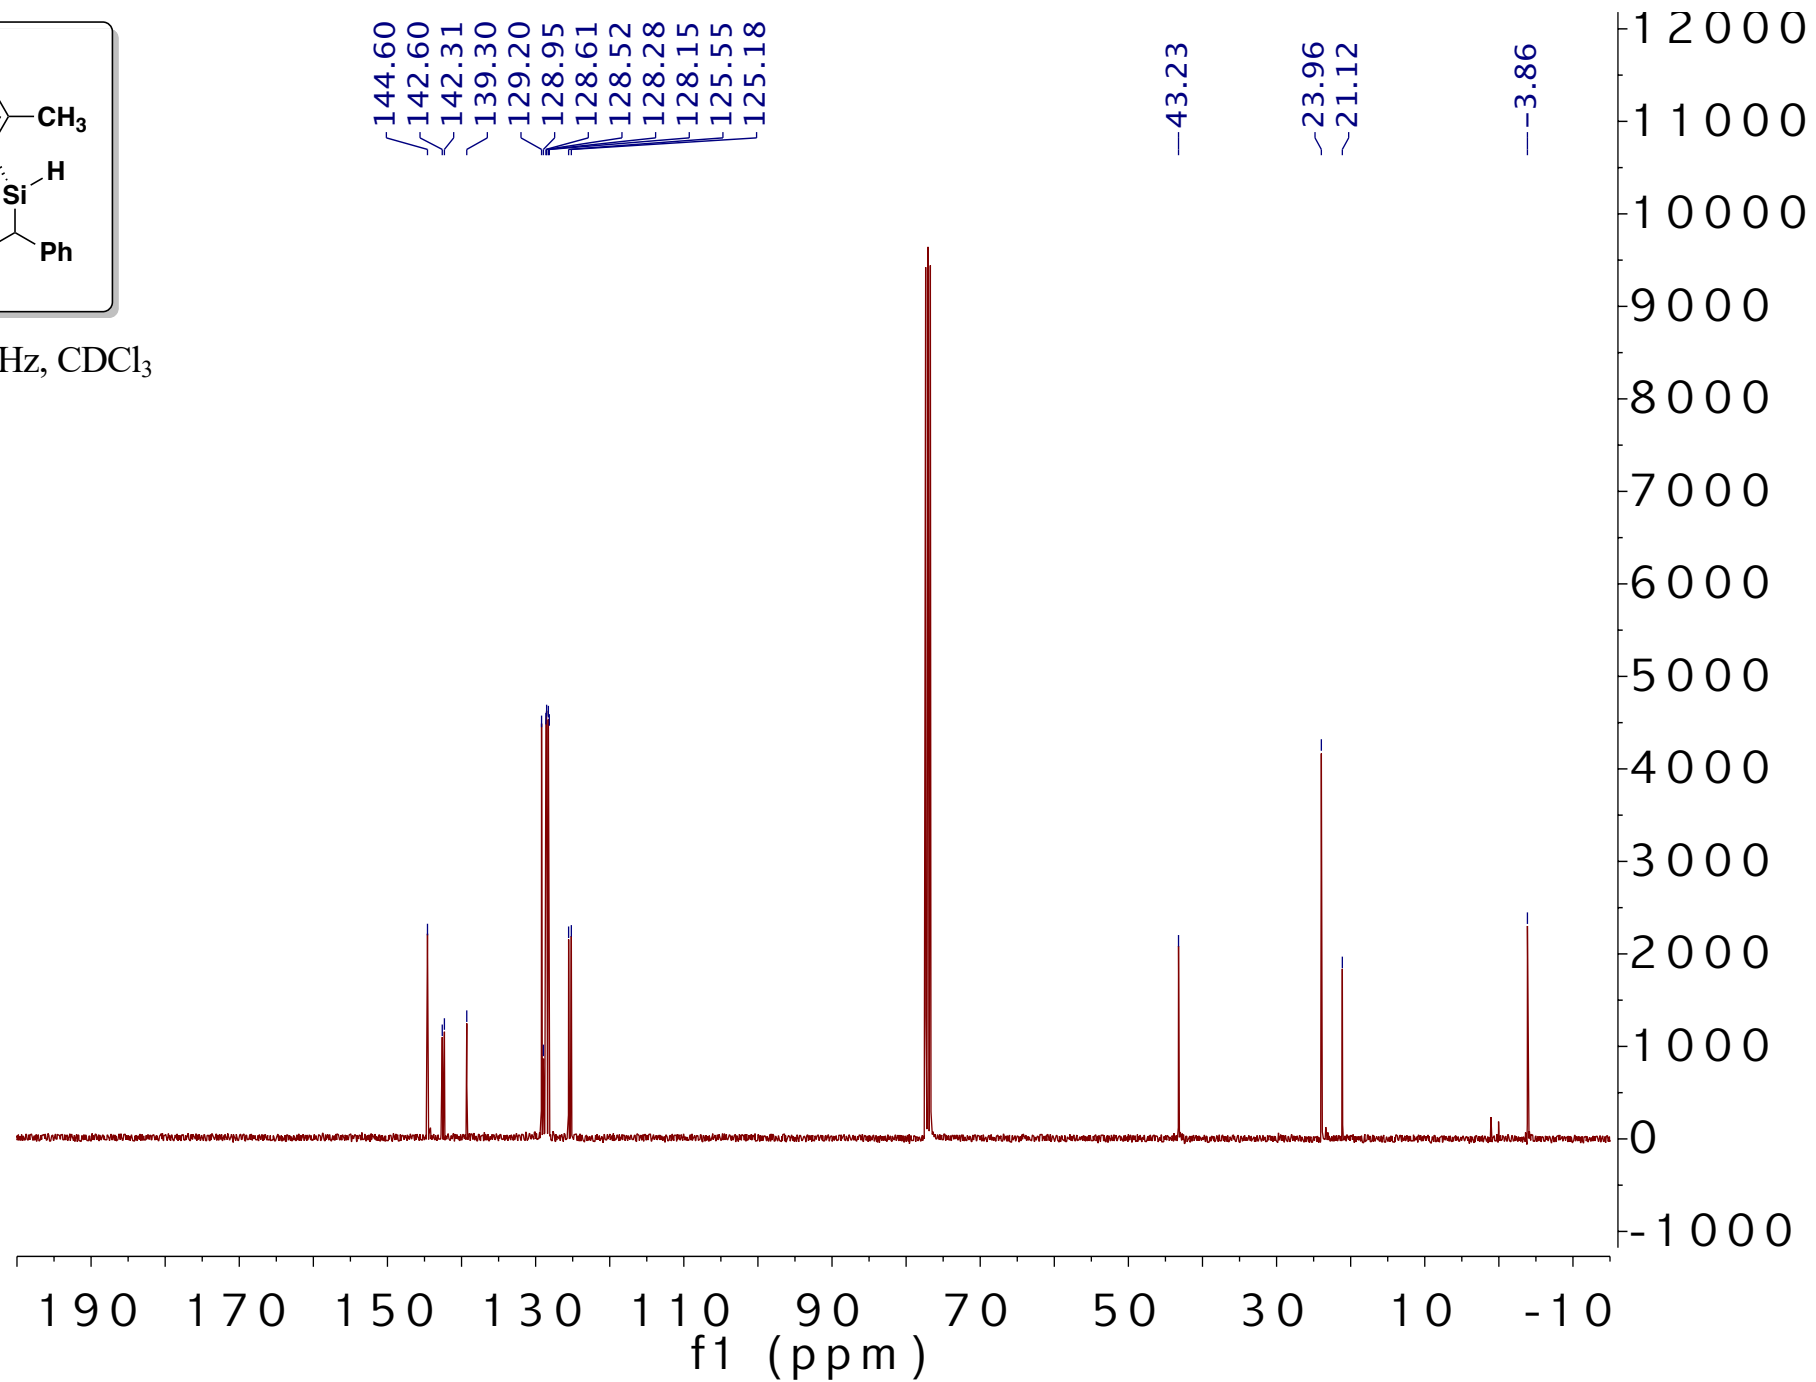

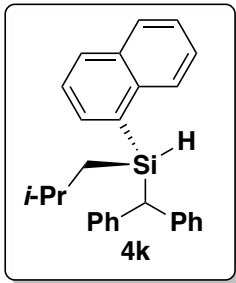

$^1\text{H}$ , 600 MHz,  $\text{CDCl}_3$

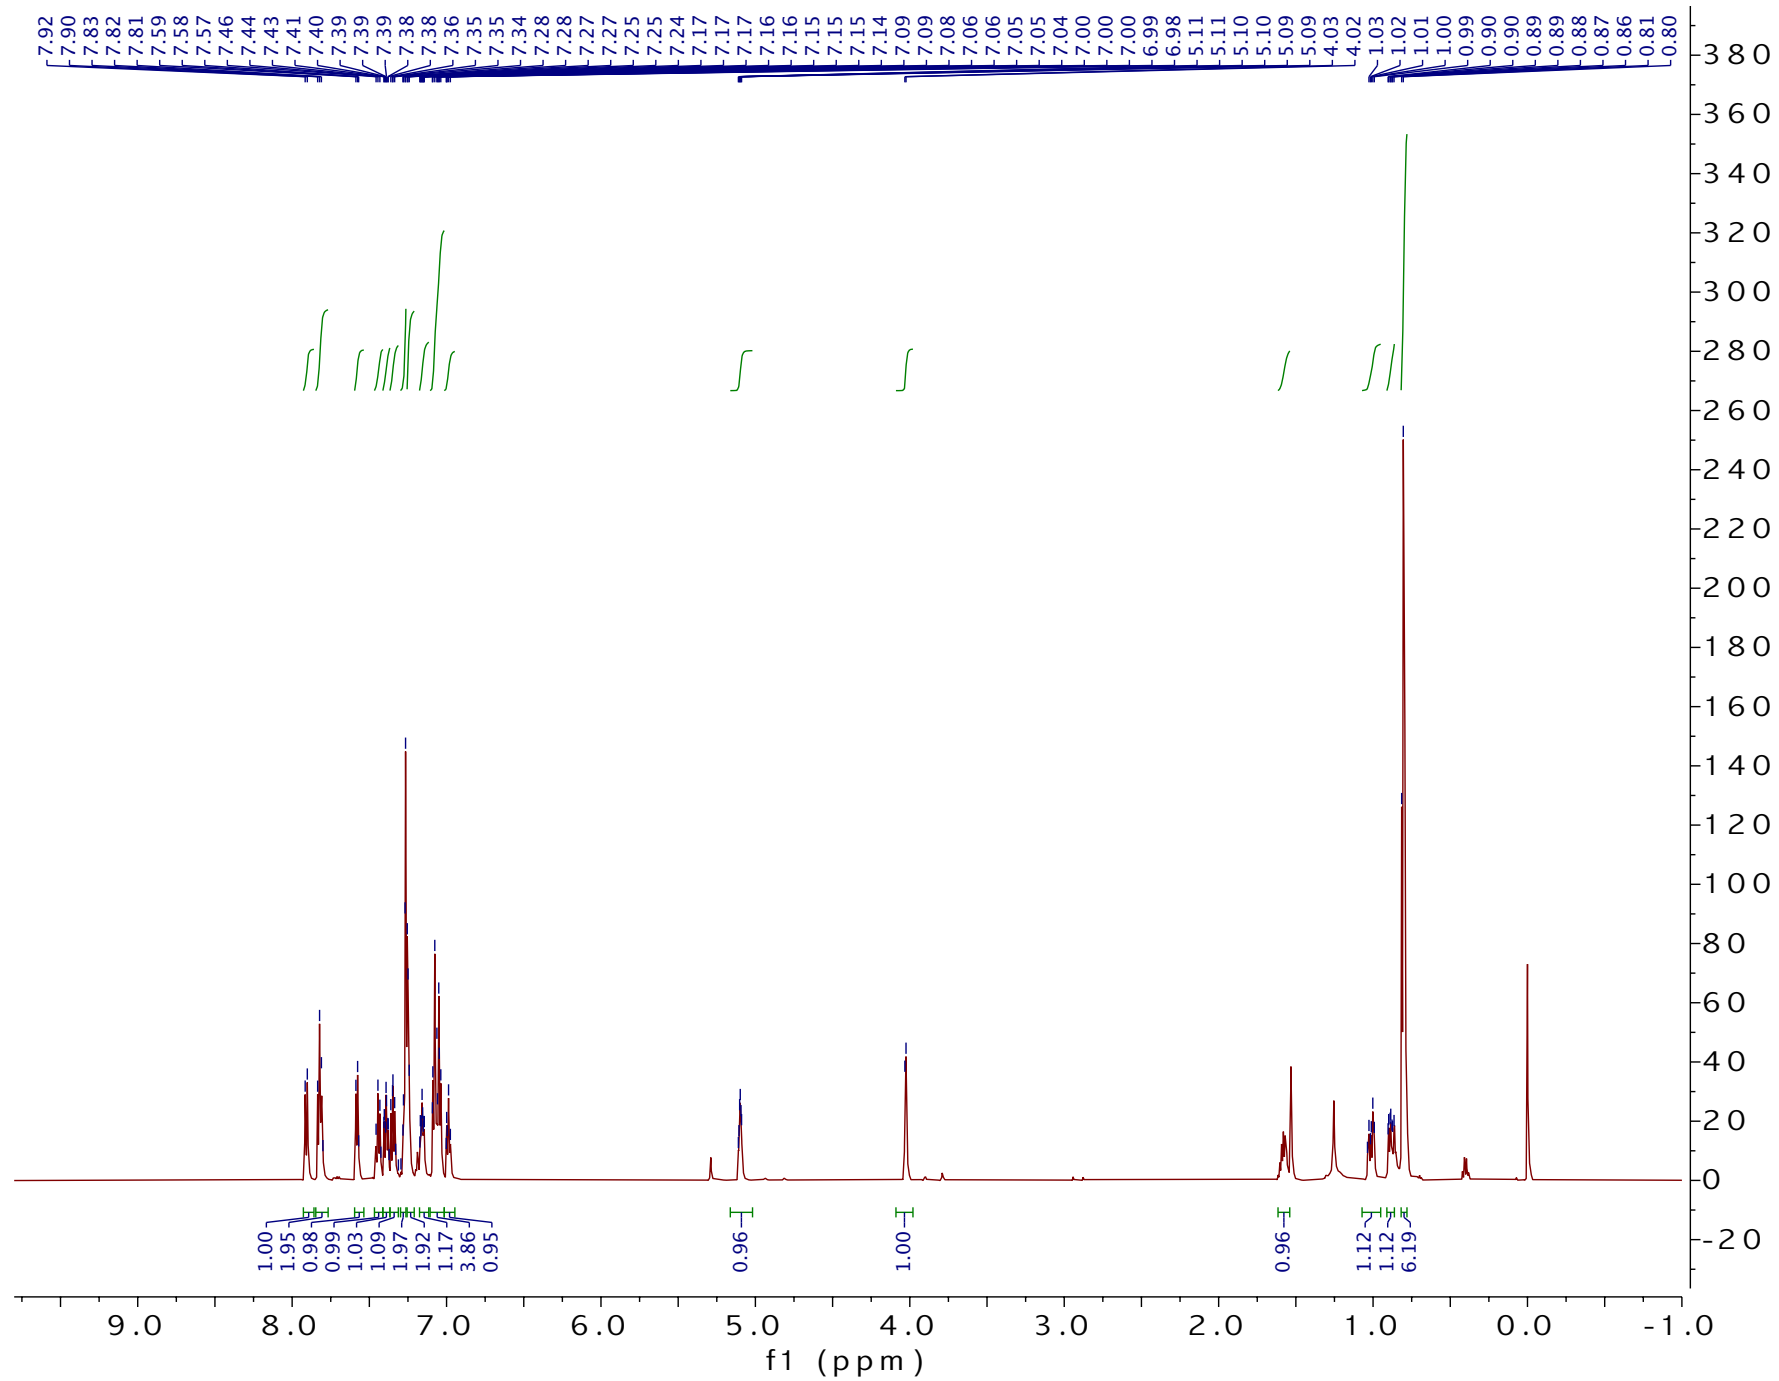

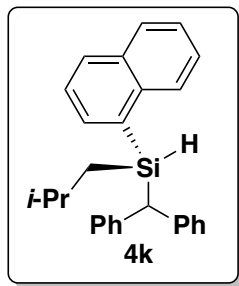

$^{13}\text{C}$ , 151 MHz,  $\text{CDCl}_3$

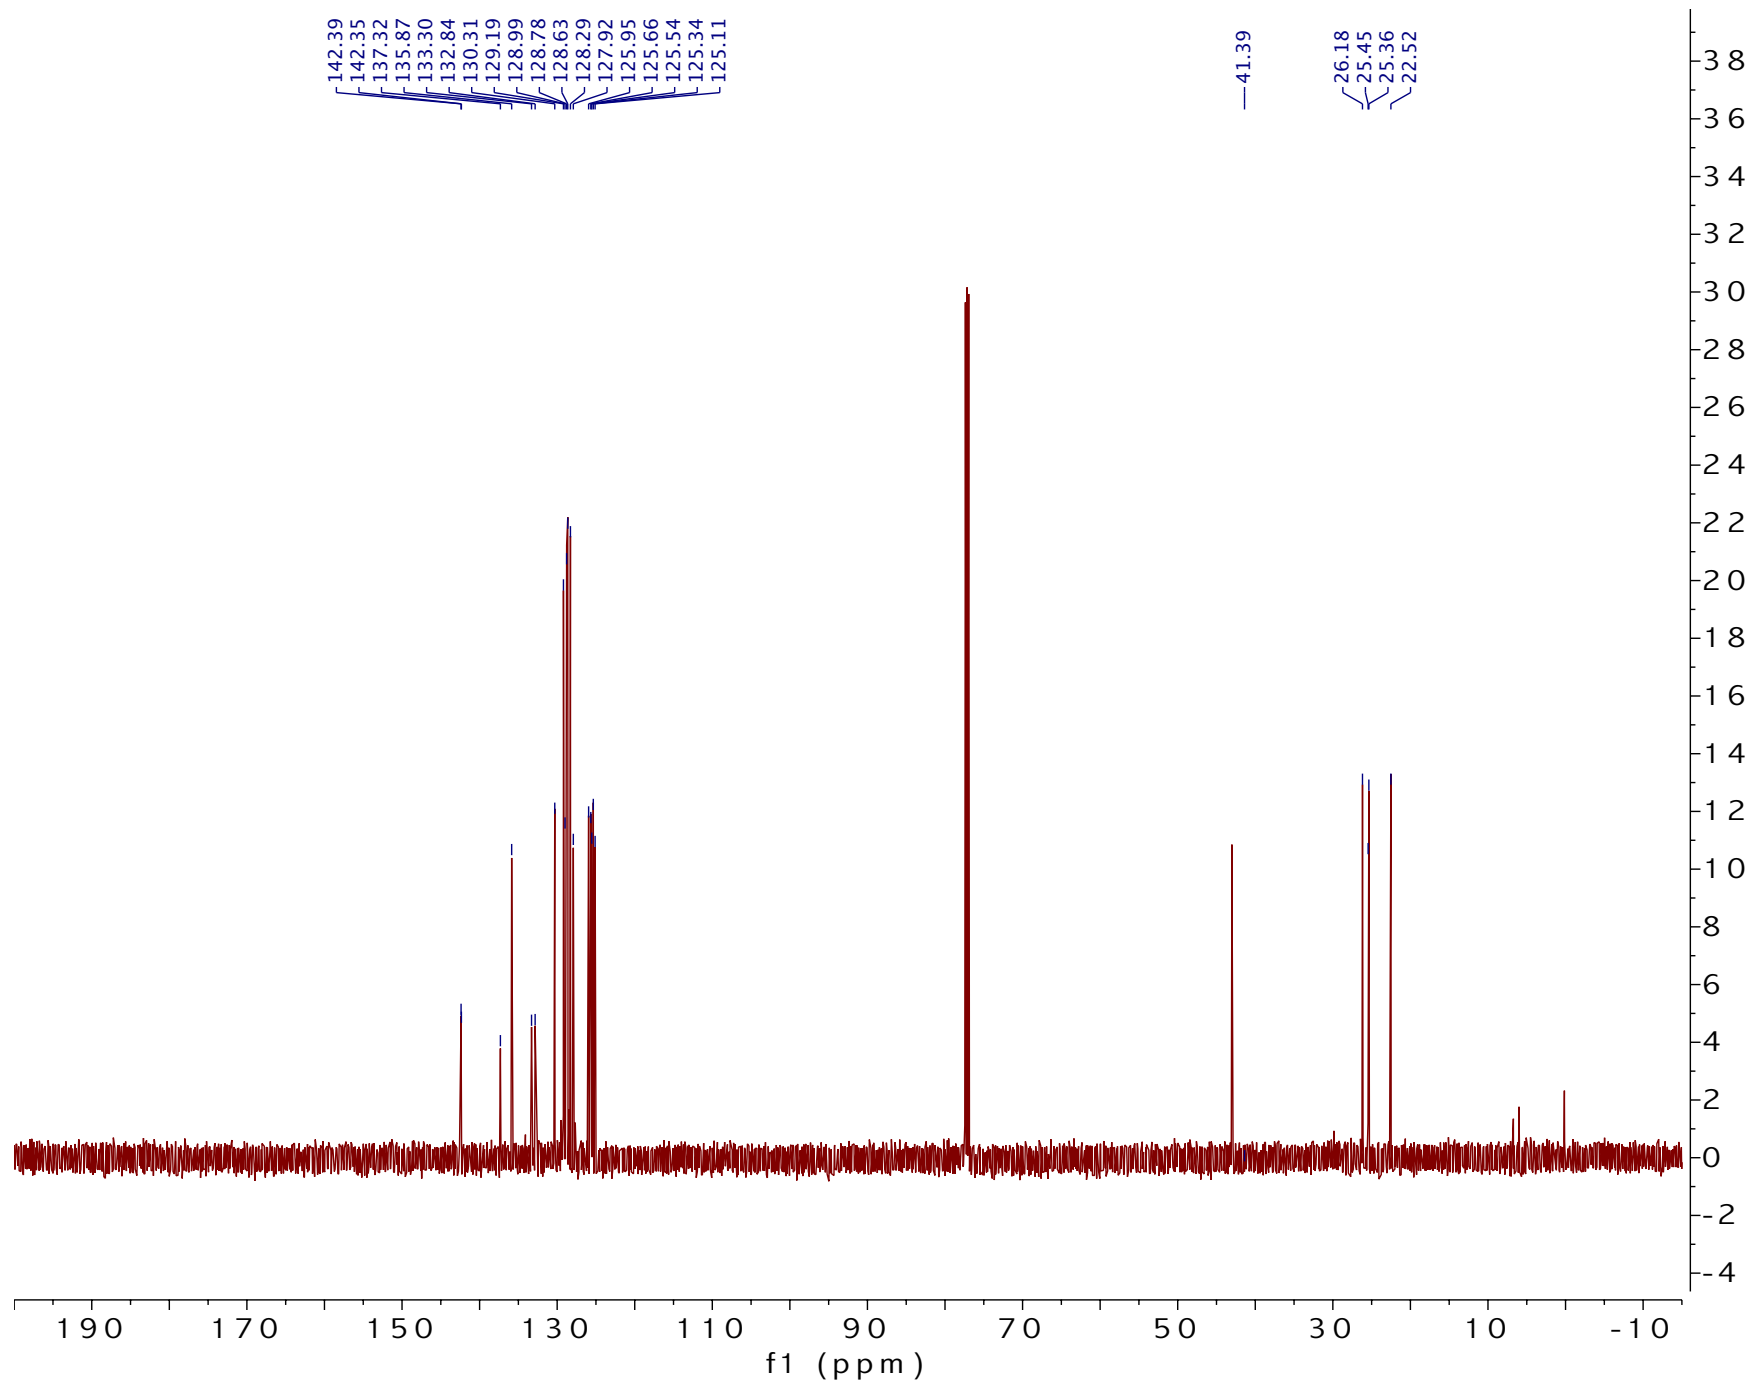

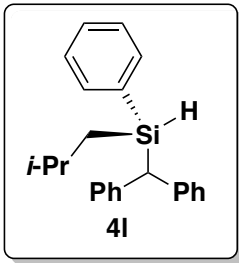

$^1\text{H}$ , 400 MHz,  $\text{CDCl}_3$

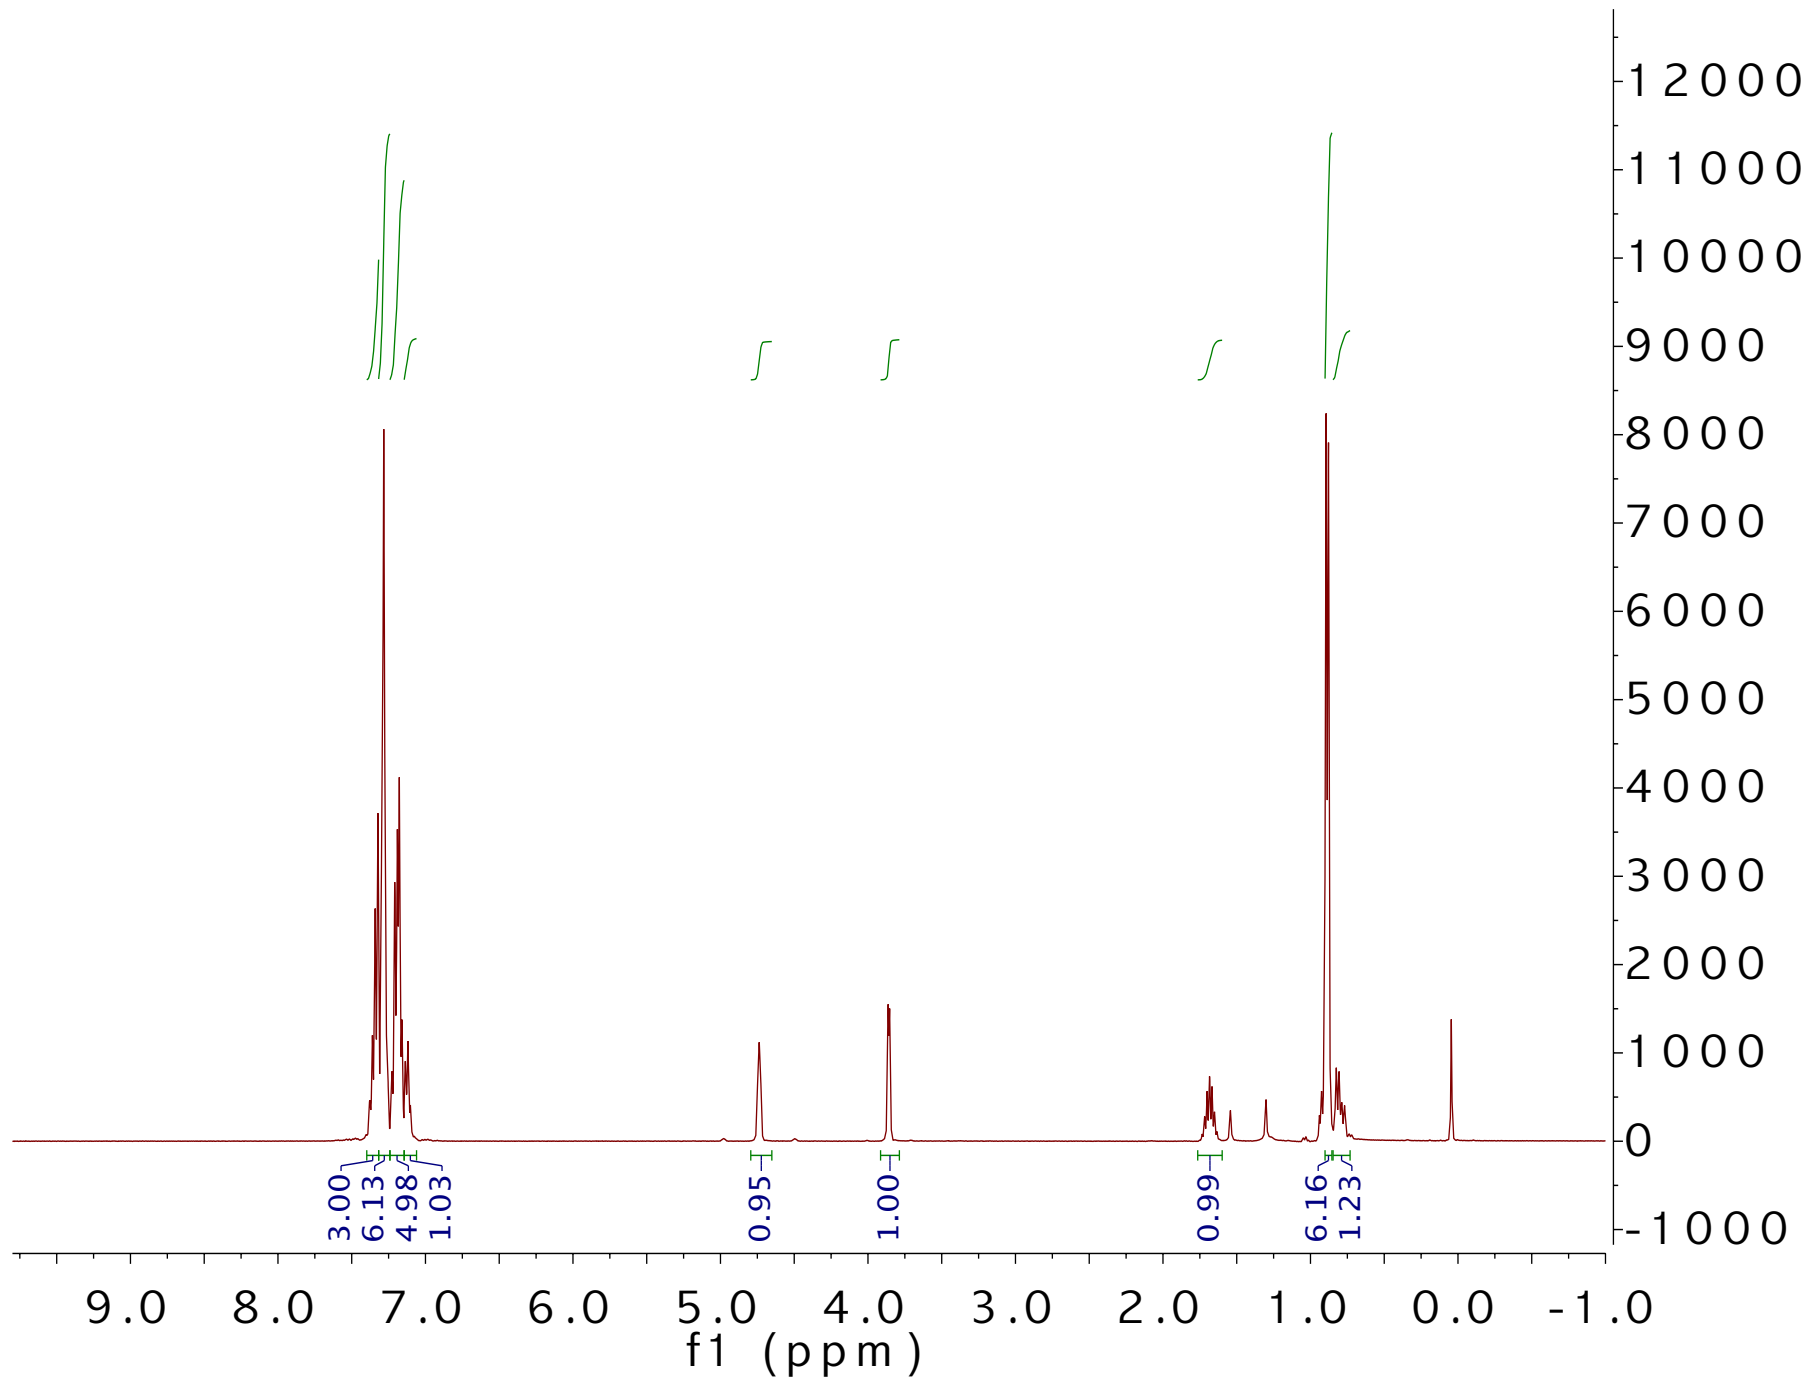

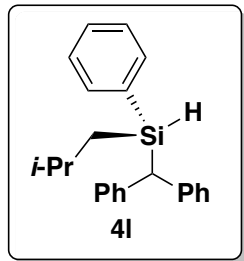

$^{13}\text{C}$ , 100 MHz,  $\text{CDCl}_3$

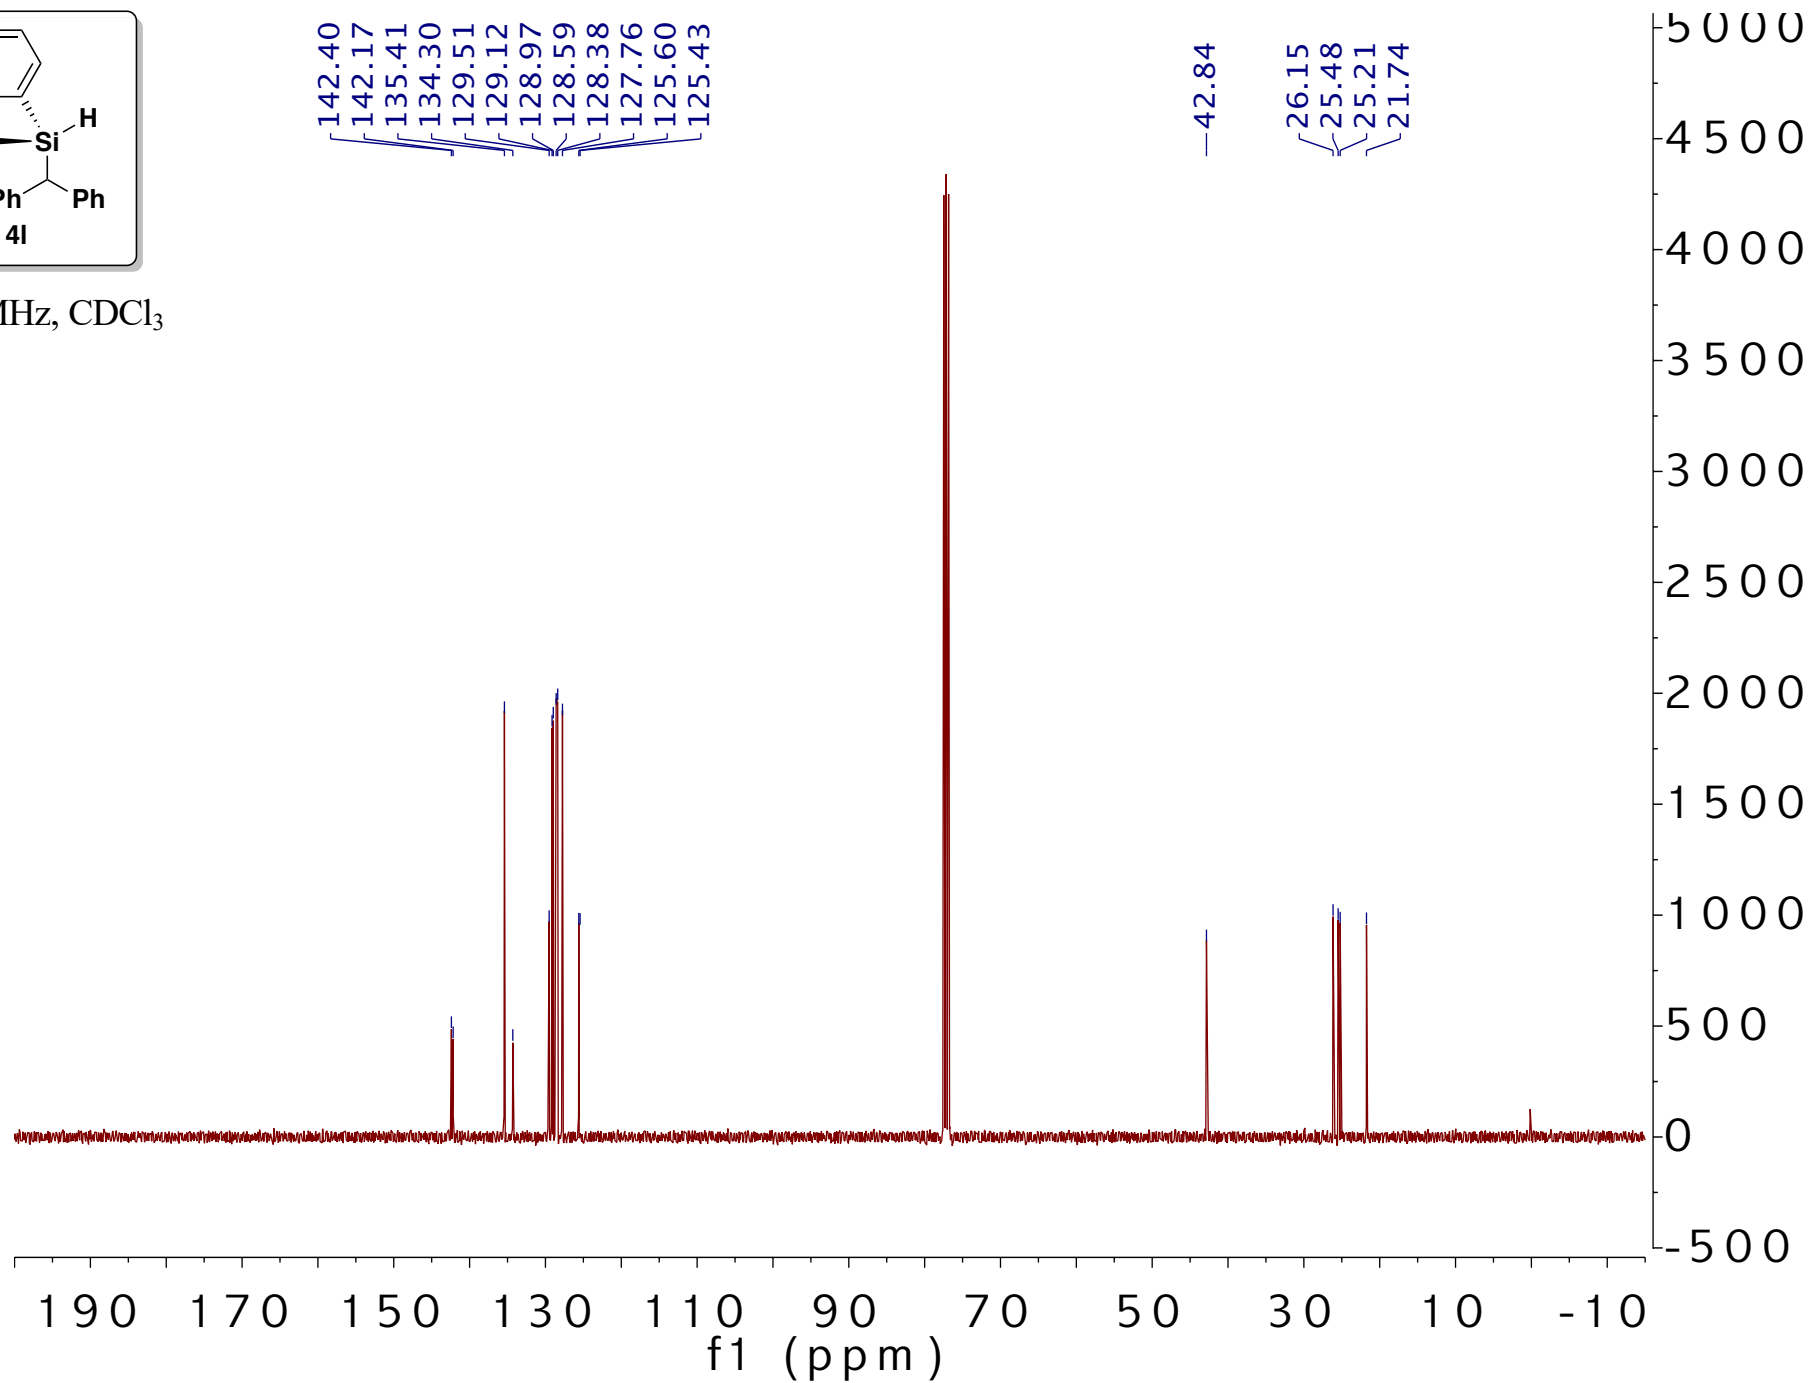

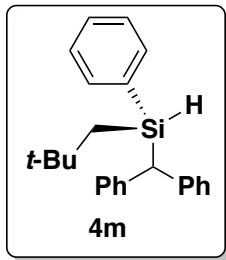

$^1\text{H}$ , 400 MHz,  $\text{CDCl}_3$

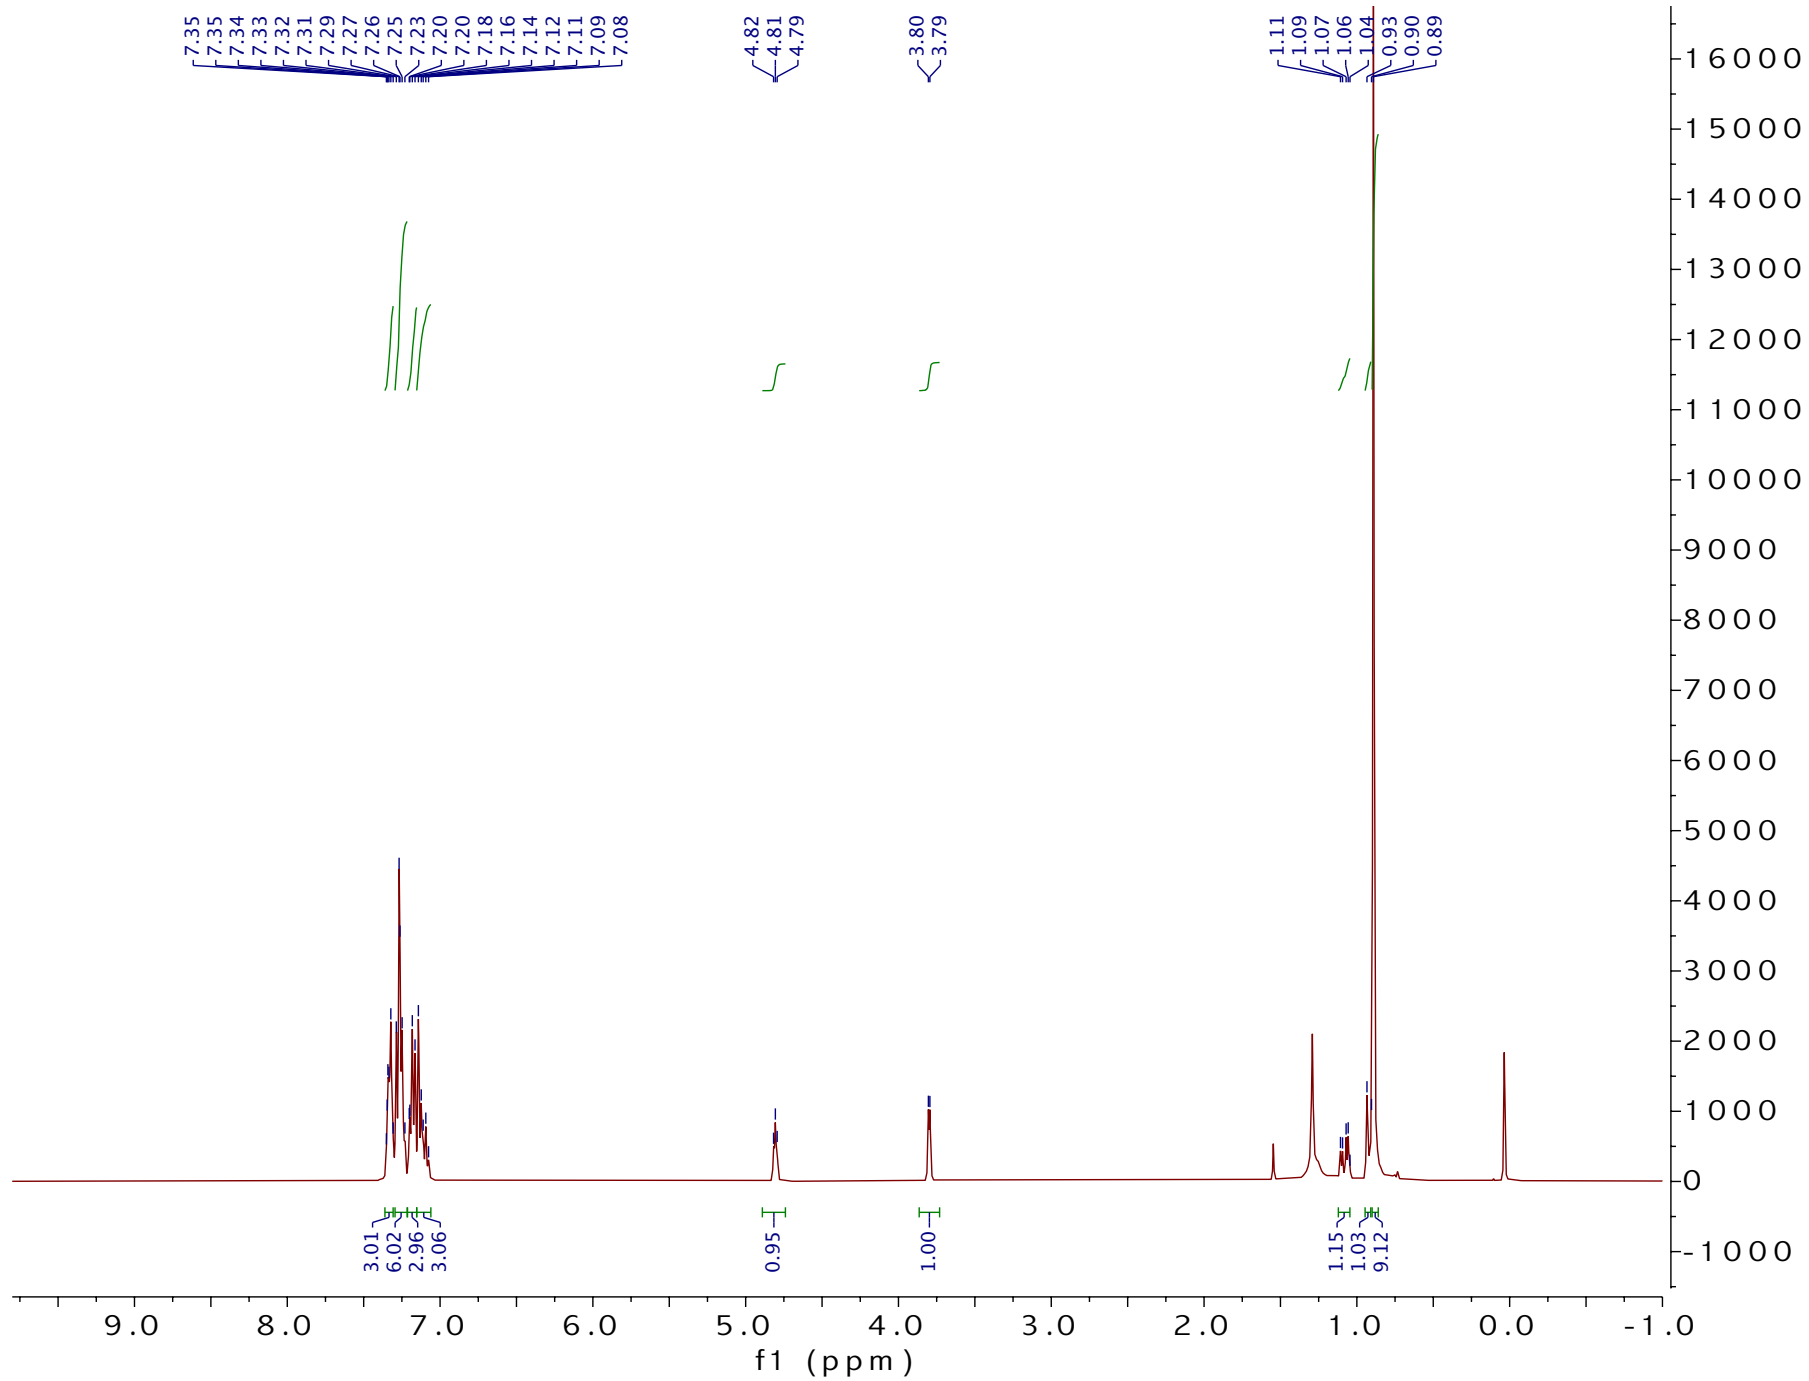

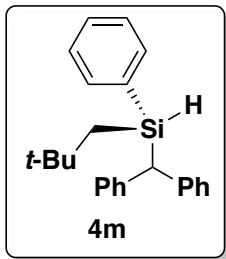

$^{13}\text{C}$ , 100 MHz,  $\text{CDCl}_3$

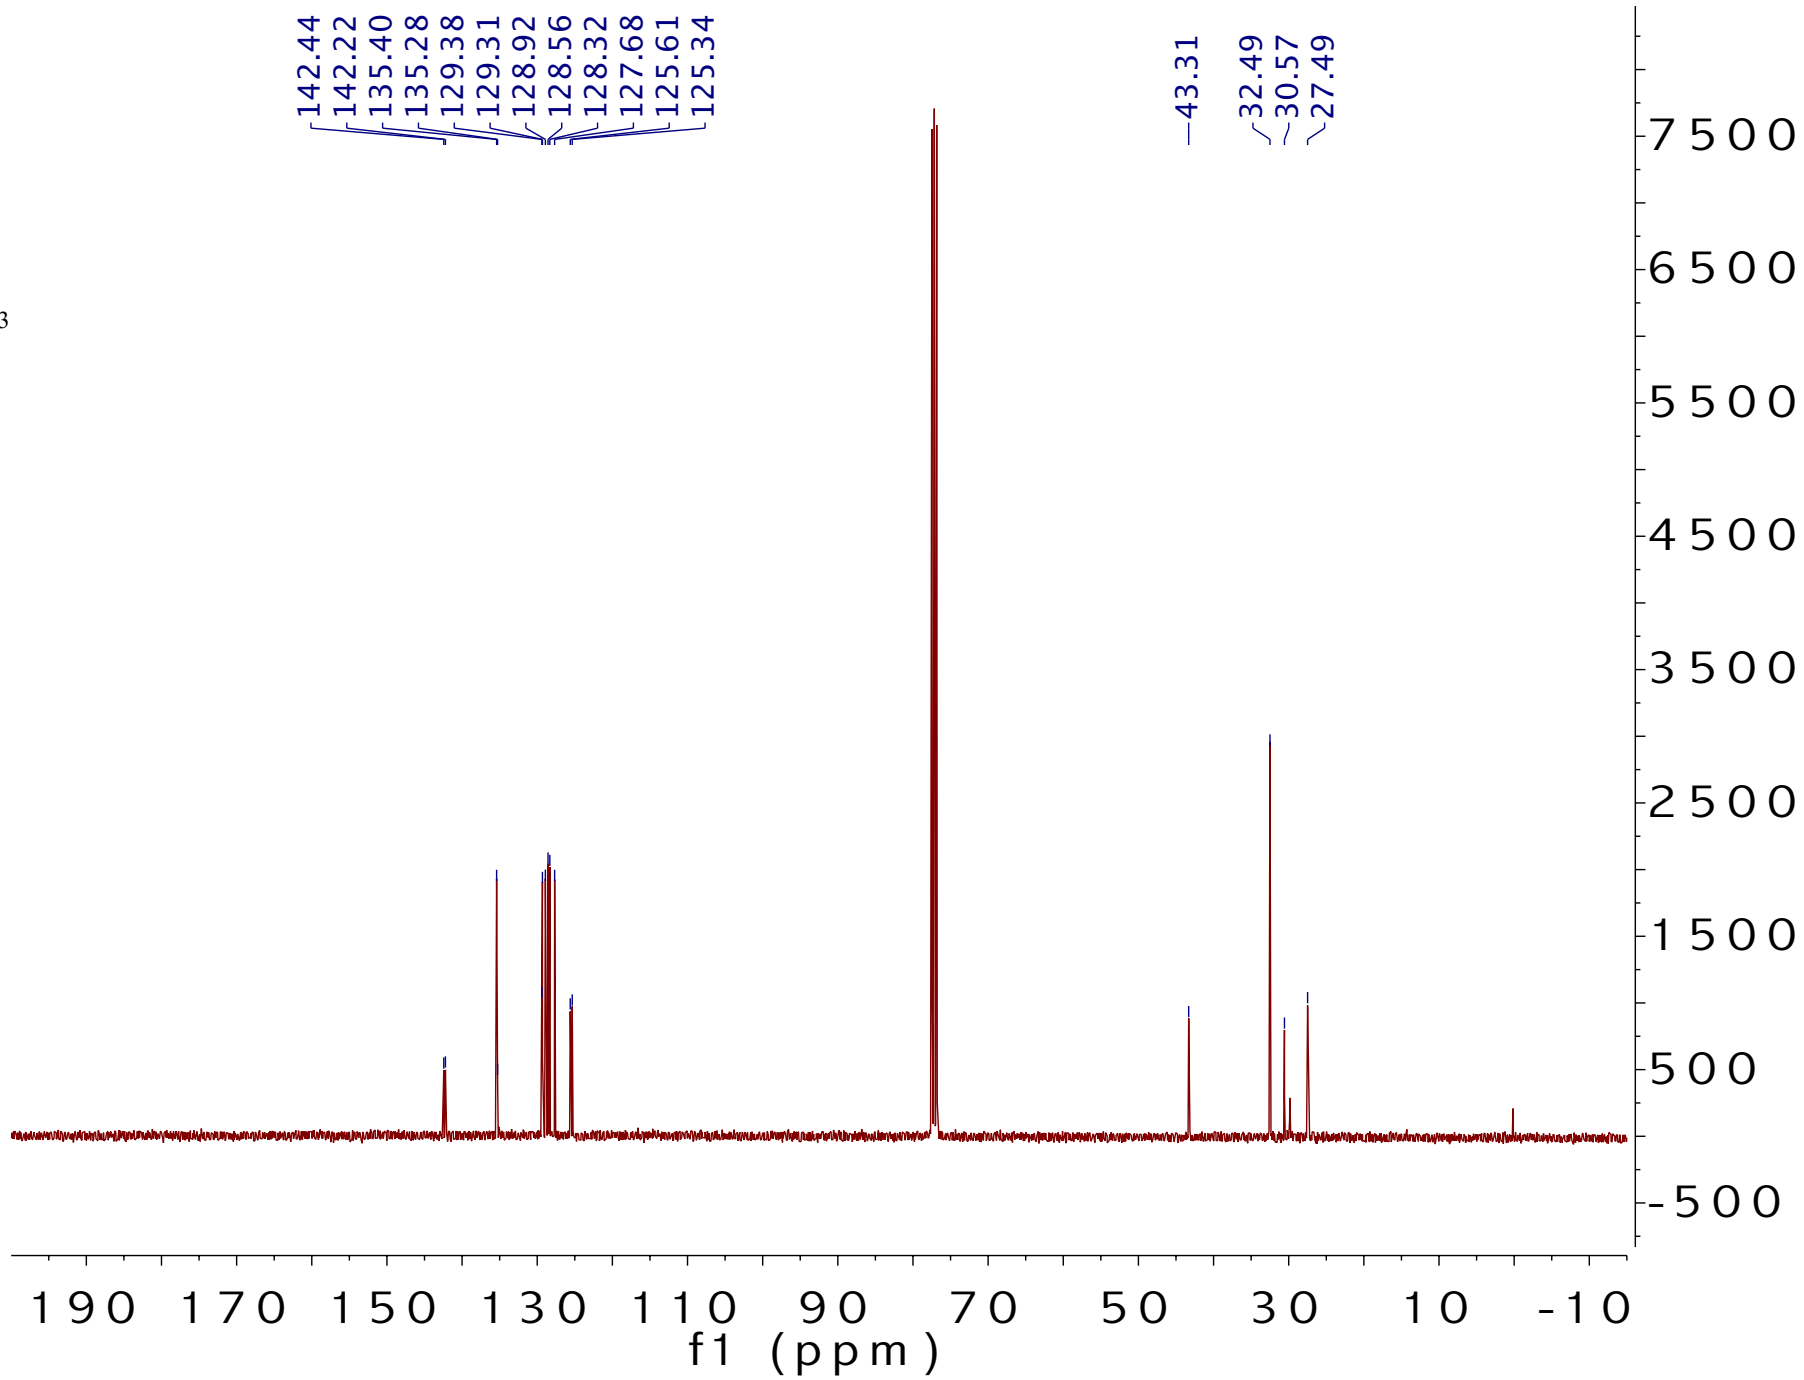

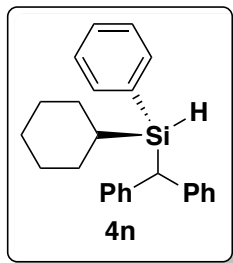

$^1\text{H}$ , 600 MHz,  $\text{CDCl}_3$

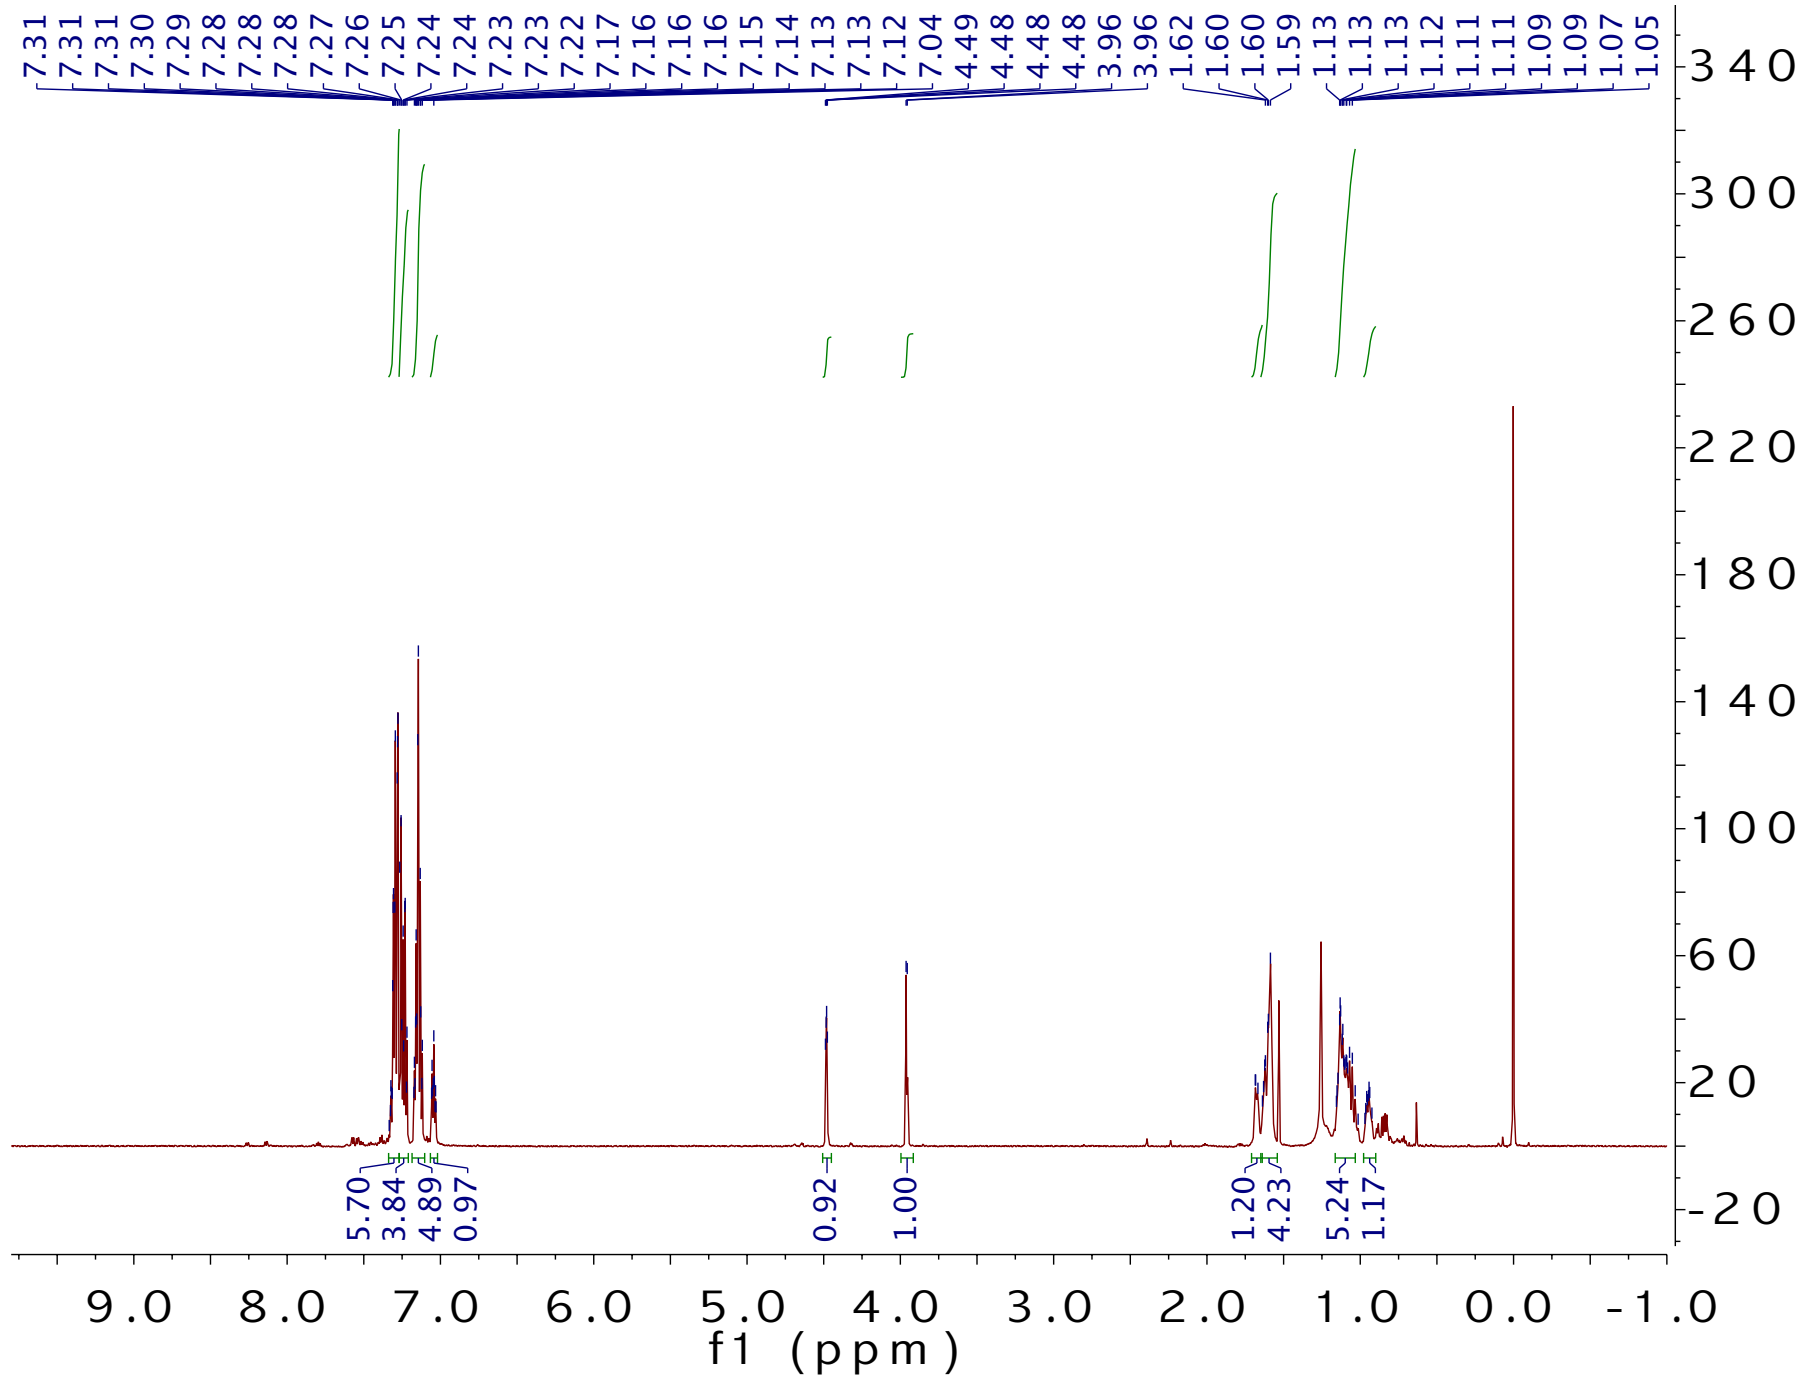



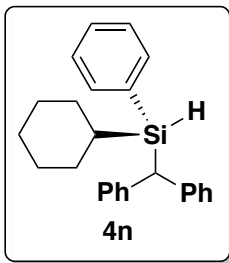

$^{13}\text{C}$ , 151 MHz,  $\text{CDCl}_3$

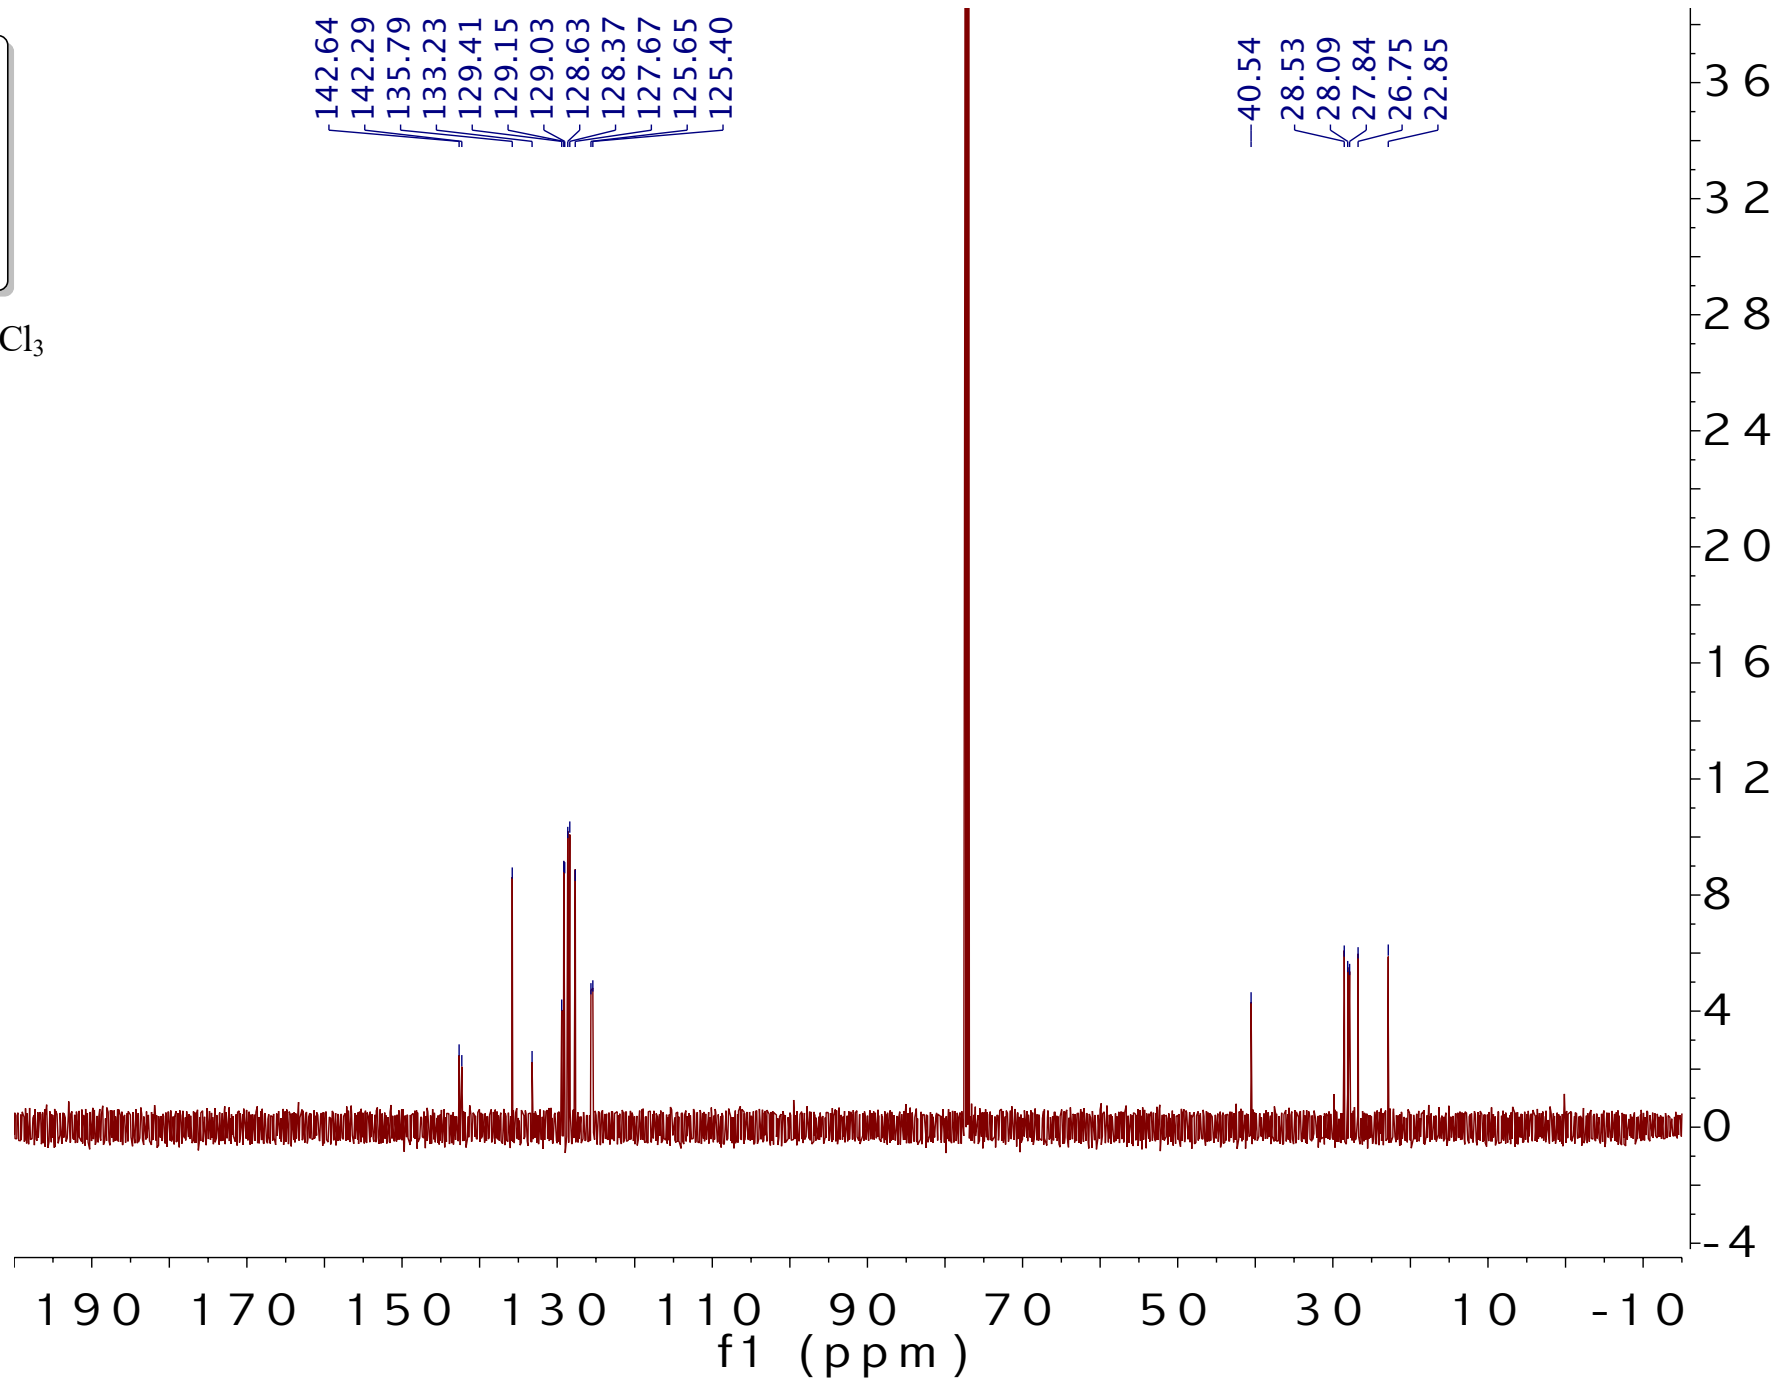

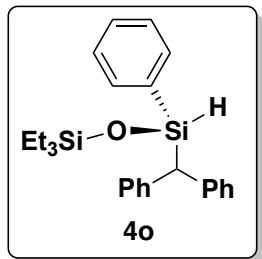

$^1\text{H}$ , 600 MHz,  $\text{CDCl}_3$

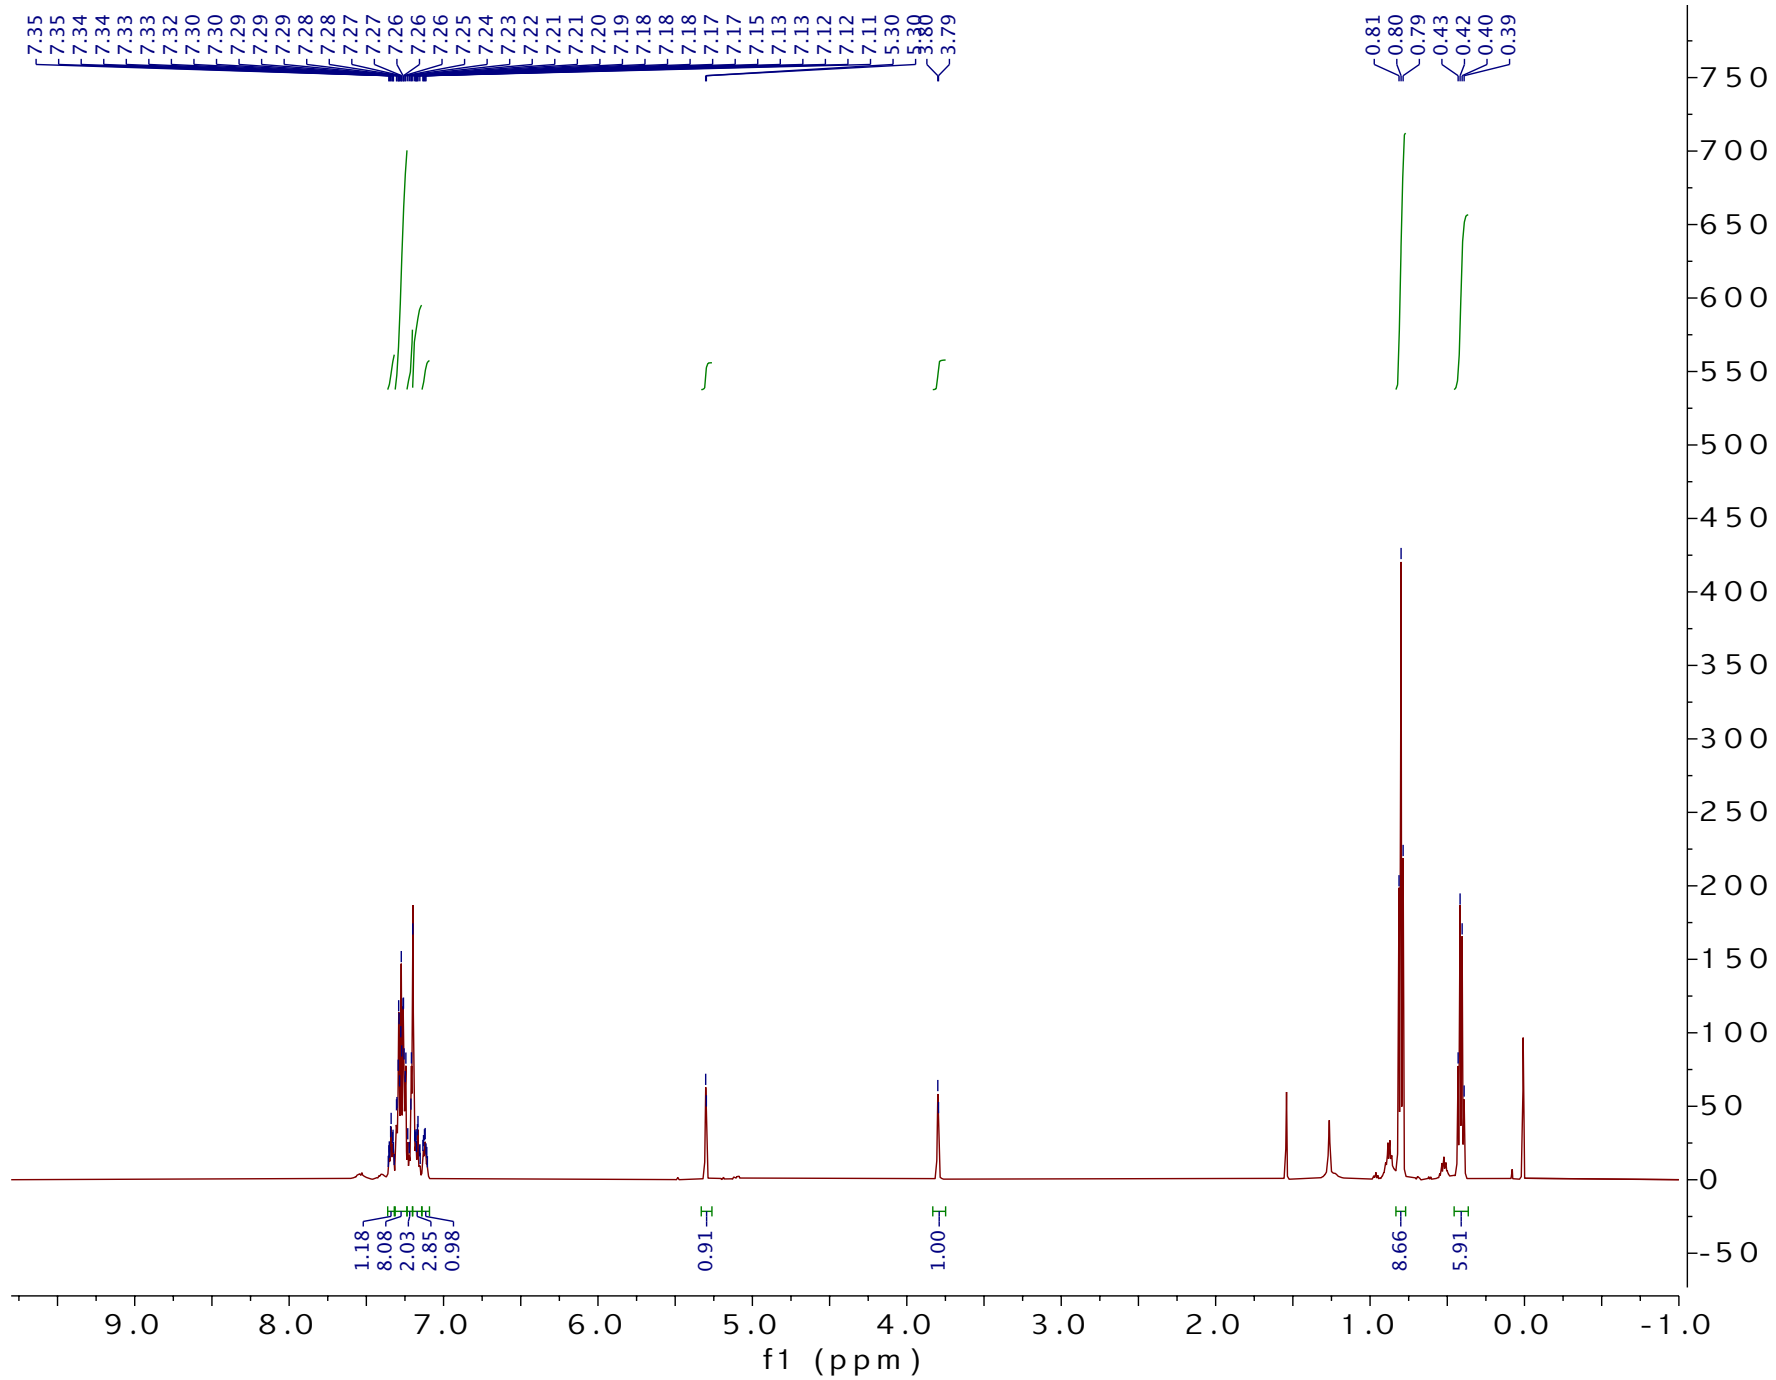

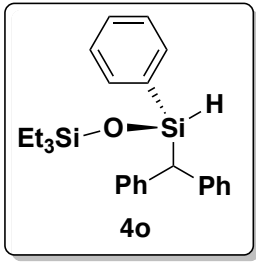

$^{13}\text{C}$ , 151 MHz,  $\text{CDCl}_3$

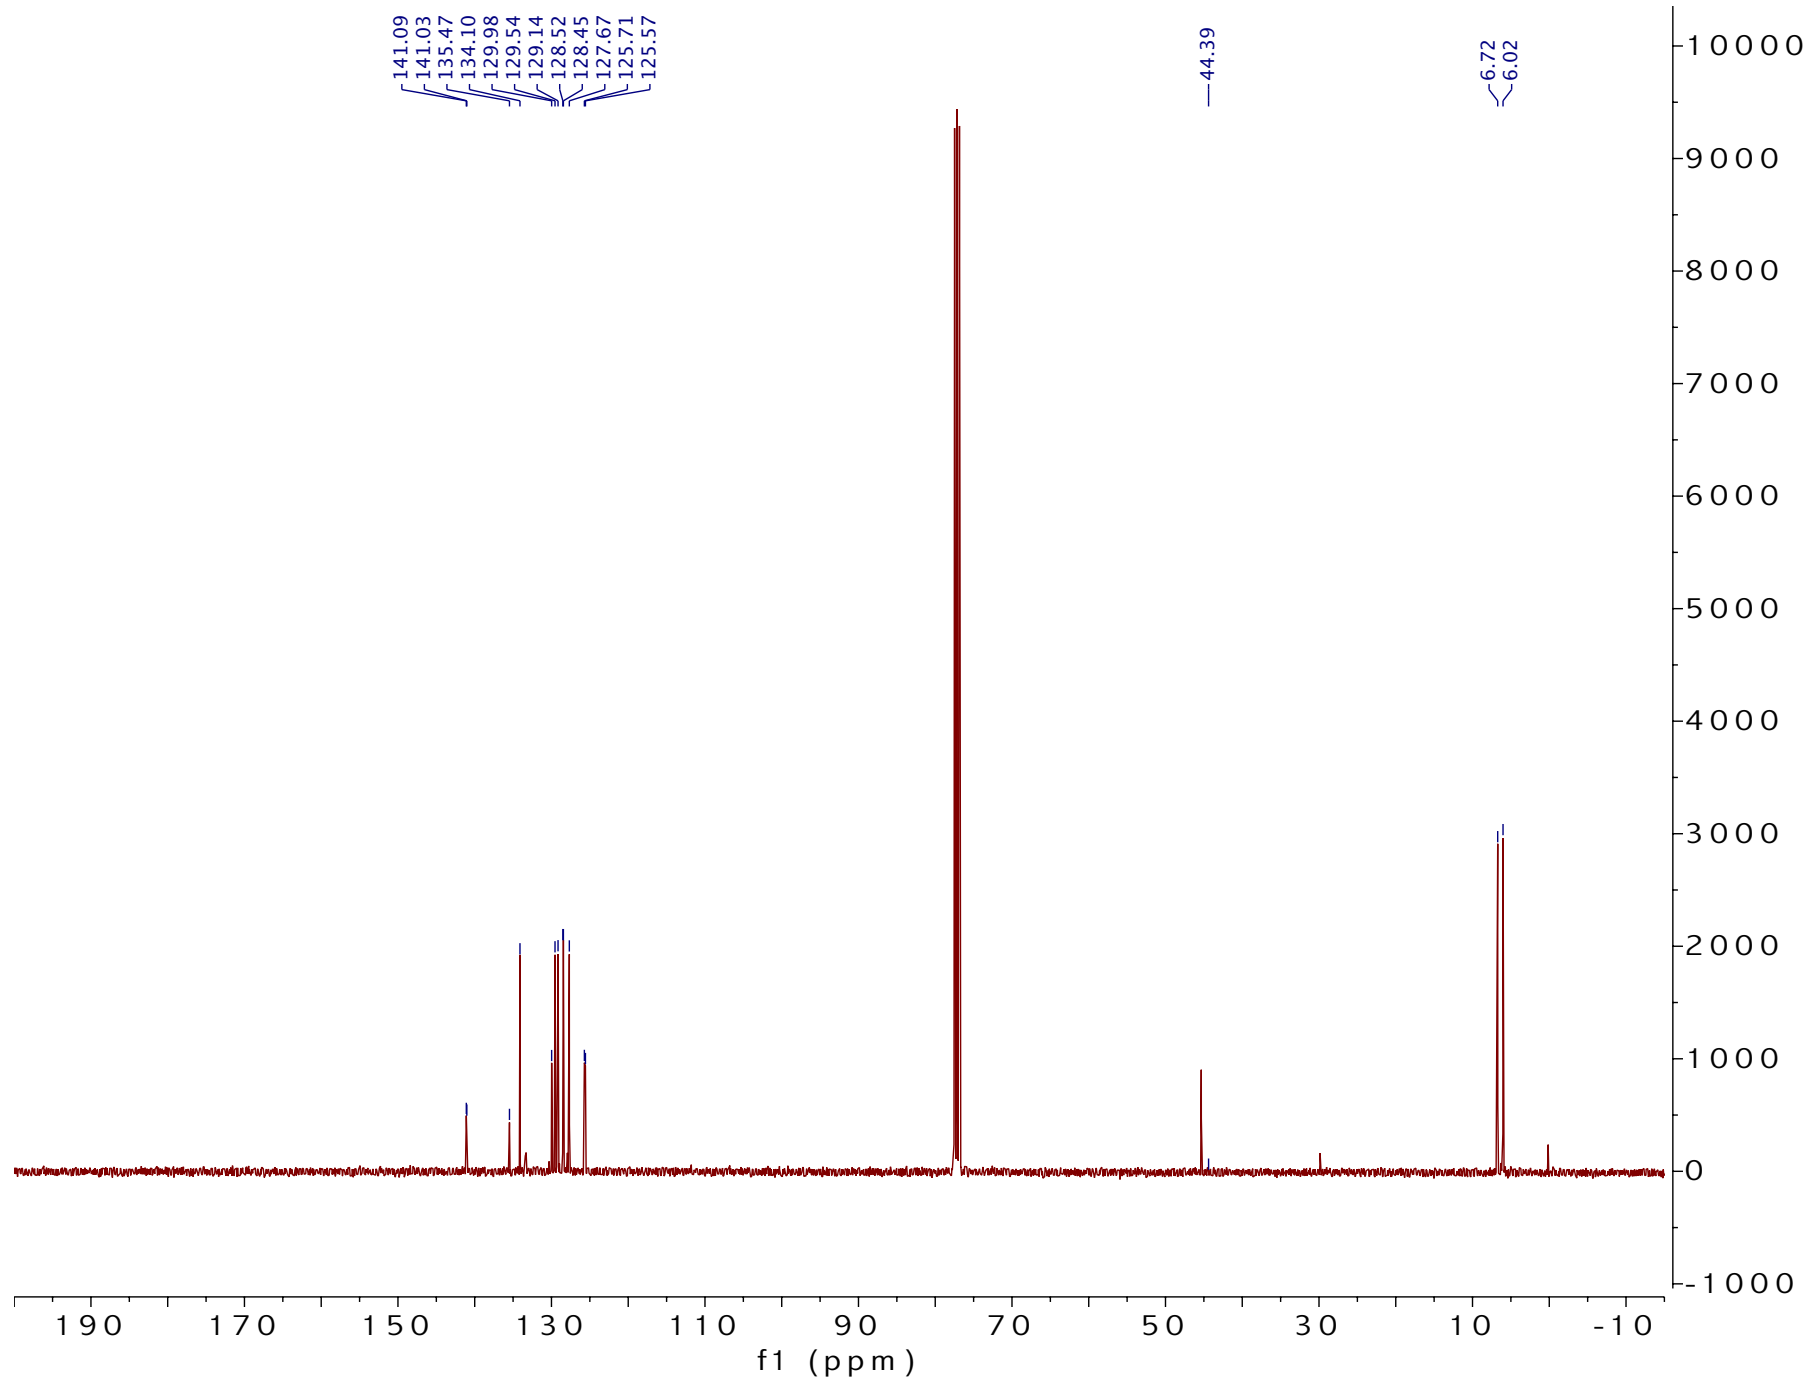

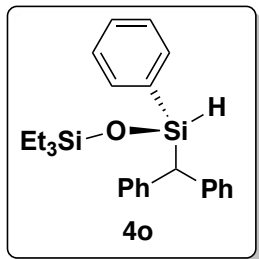

$^{29}\text{Si}$ , 76 MHz,  $\text{CDCl}_3$

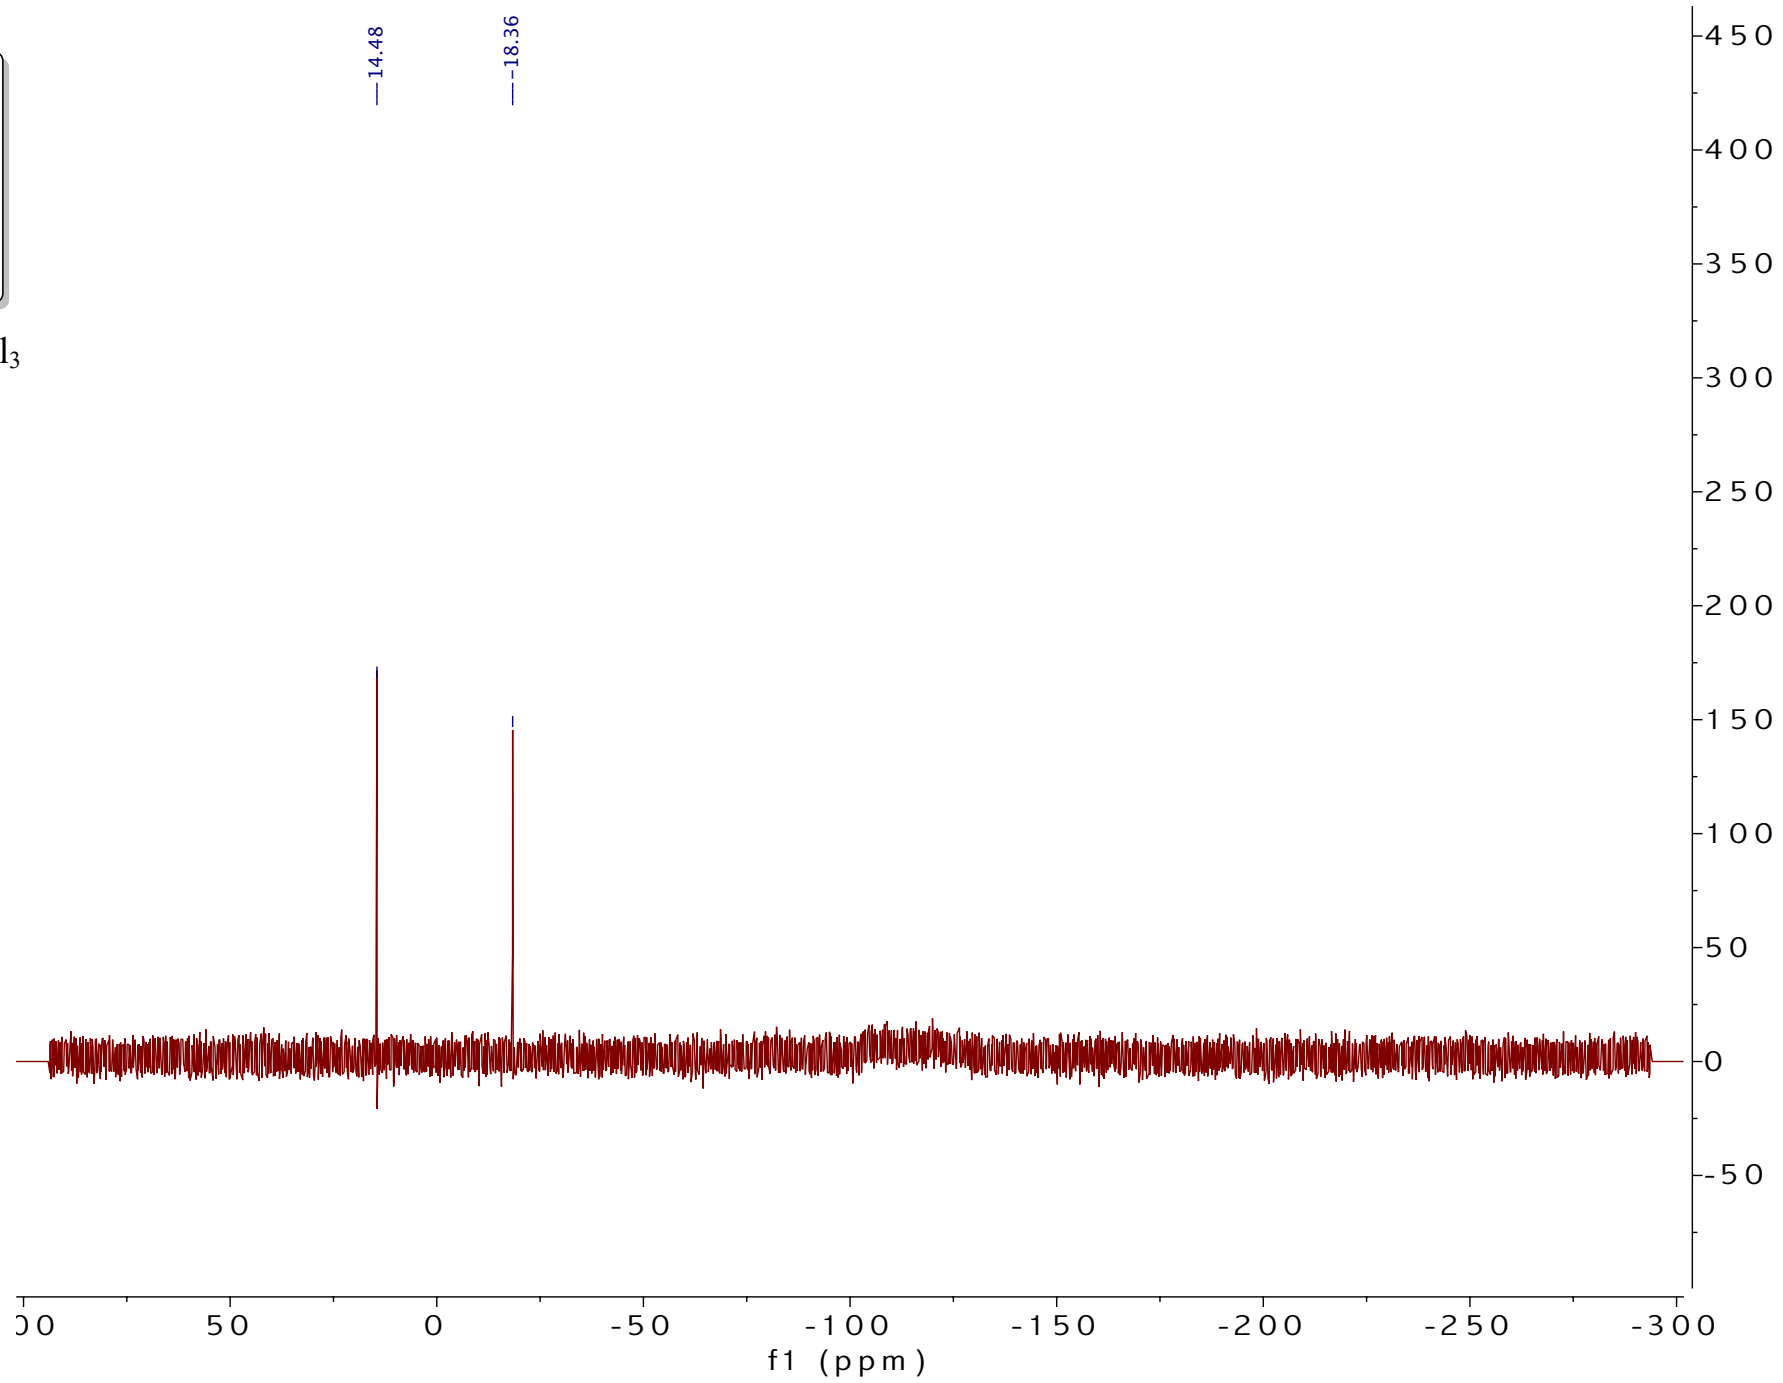

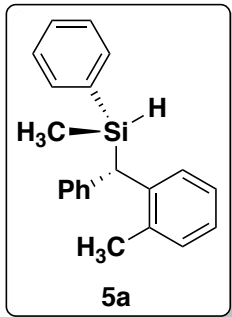

$^1\text{H}$ , 600 MHz,  $\text{CDCl}_3$

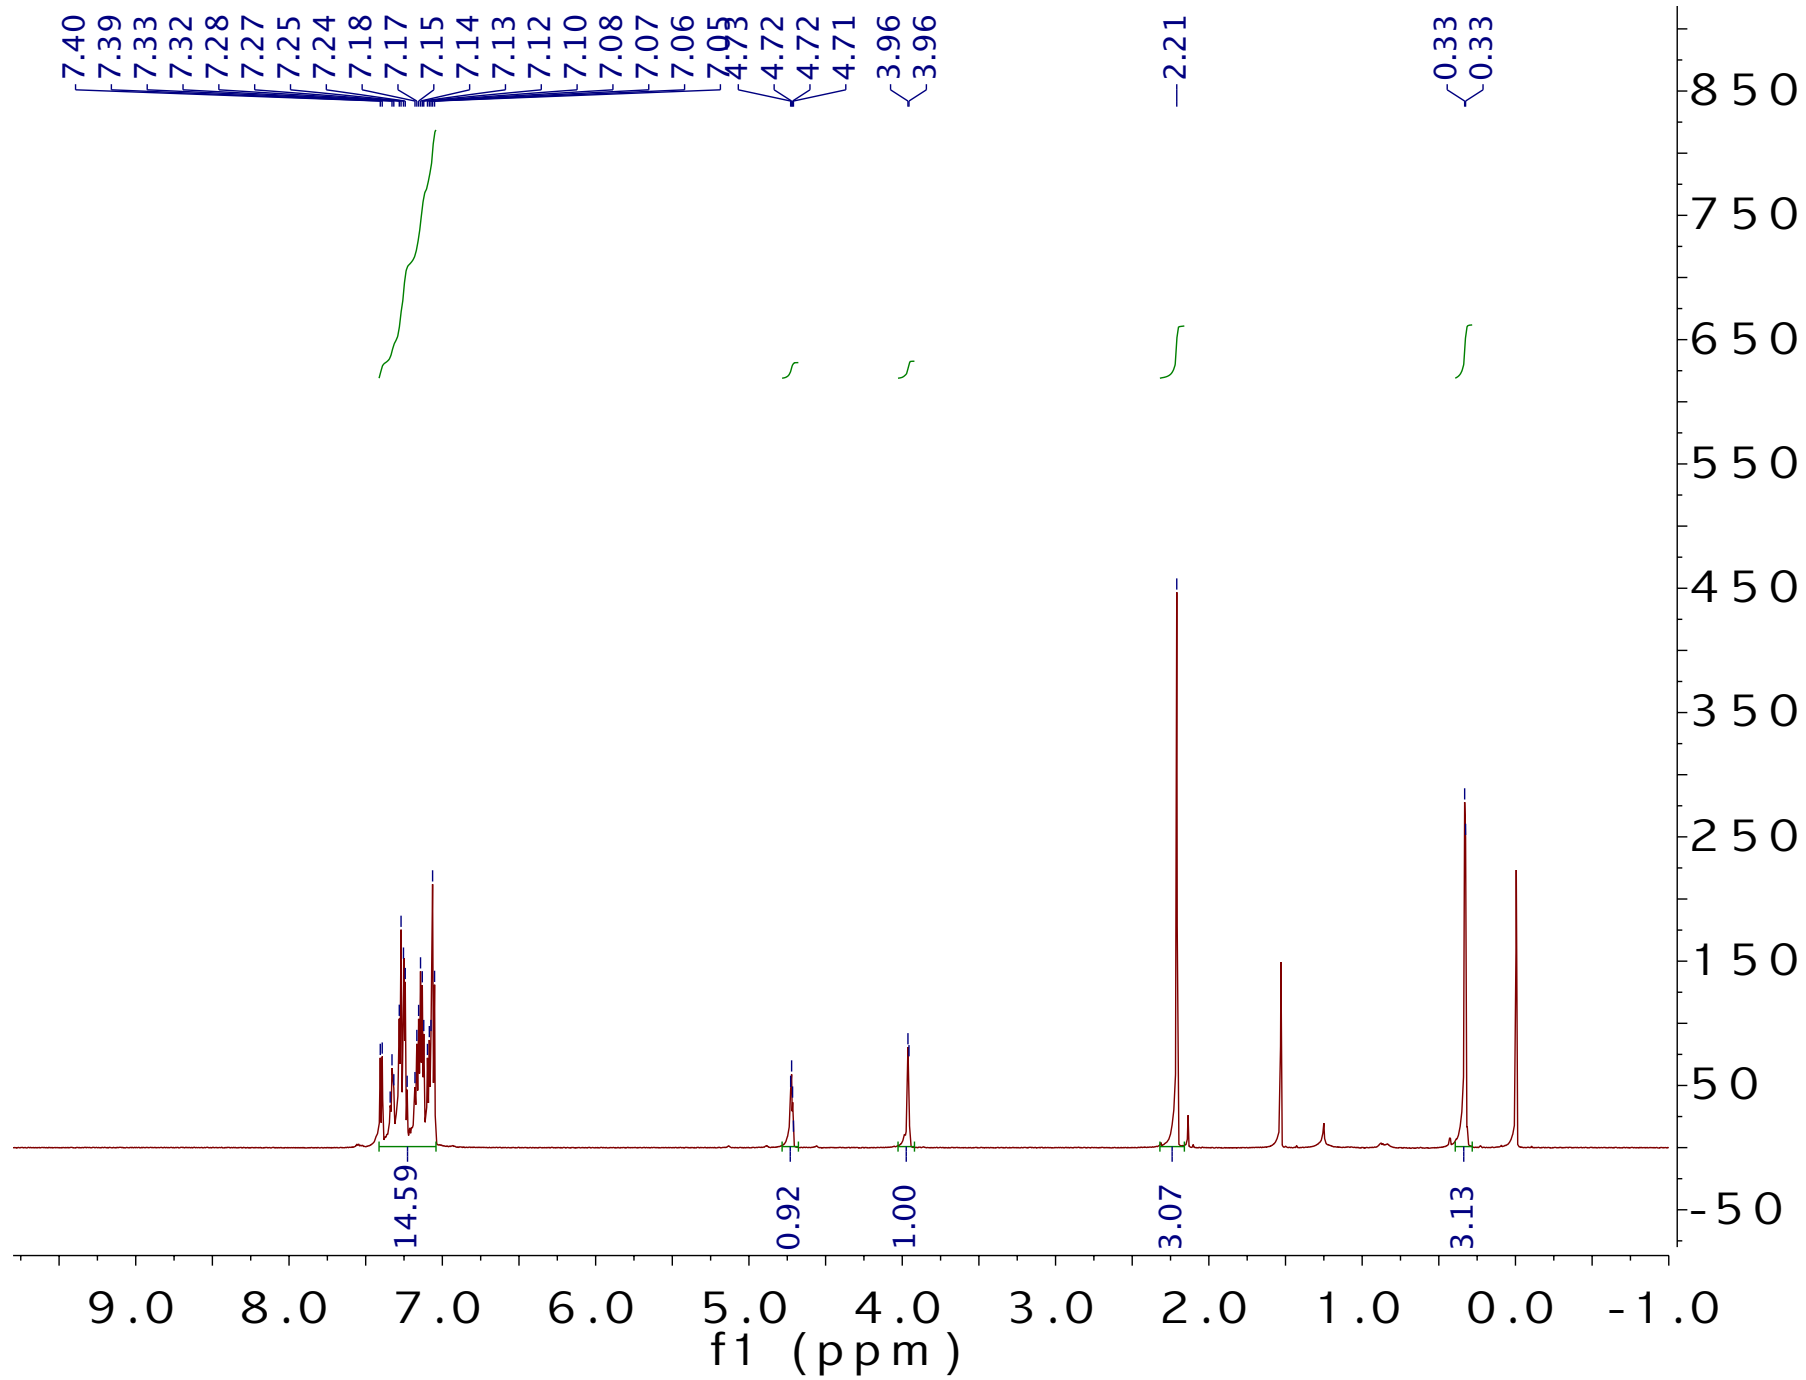

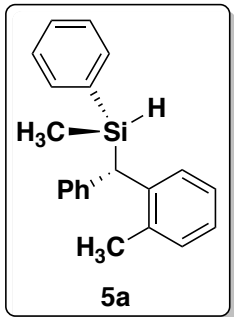

$^{13}\text{C}$ , 150 MHz,  $\text{CDCl}_3$

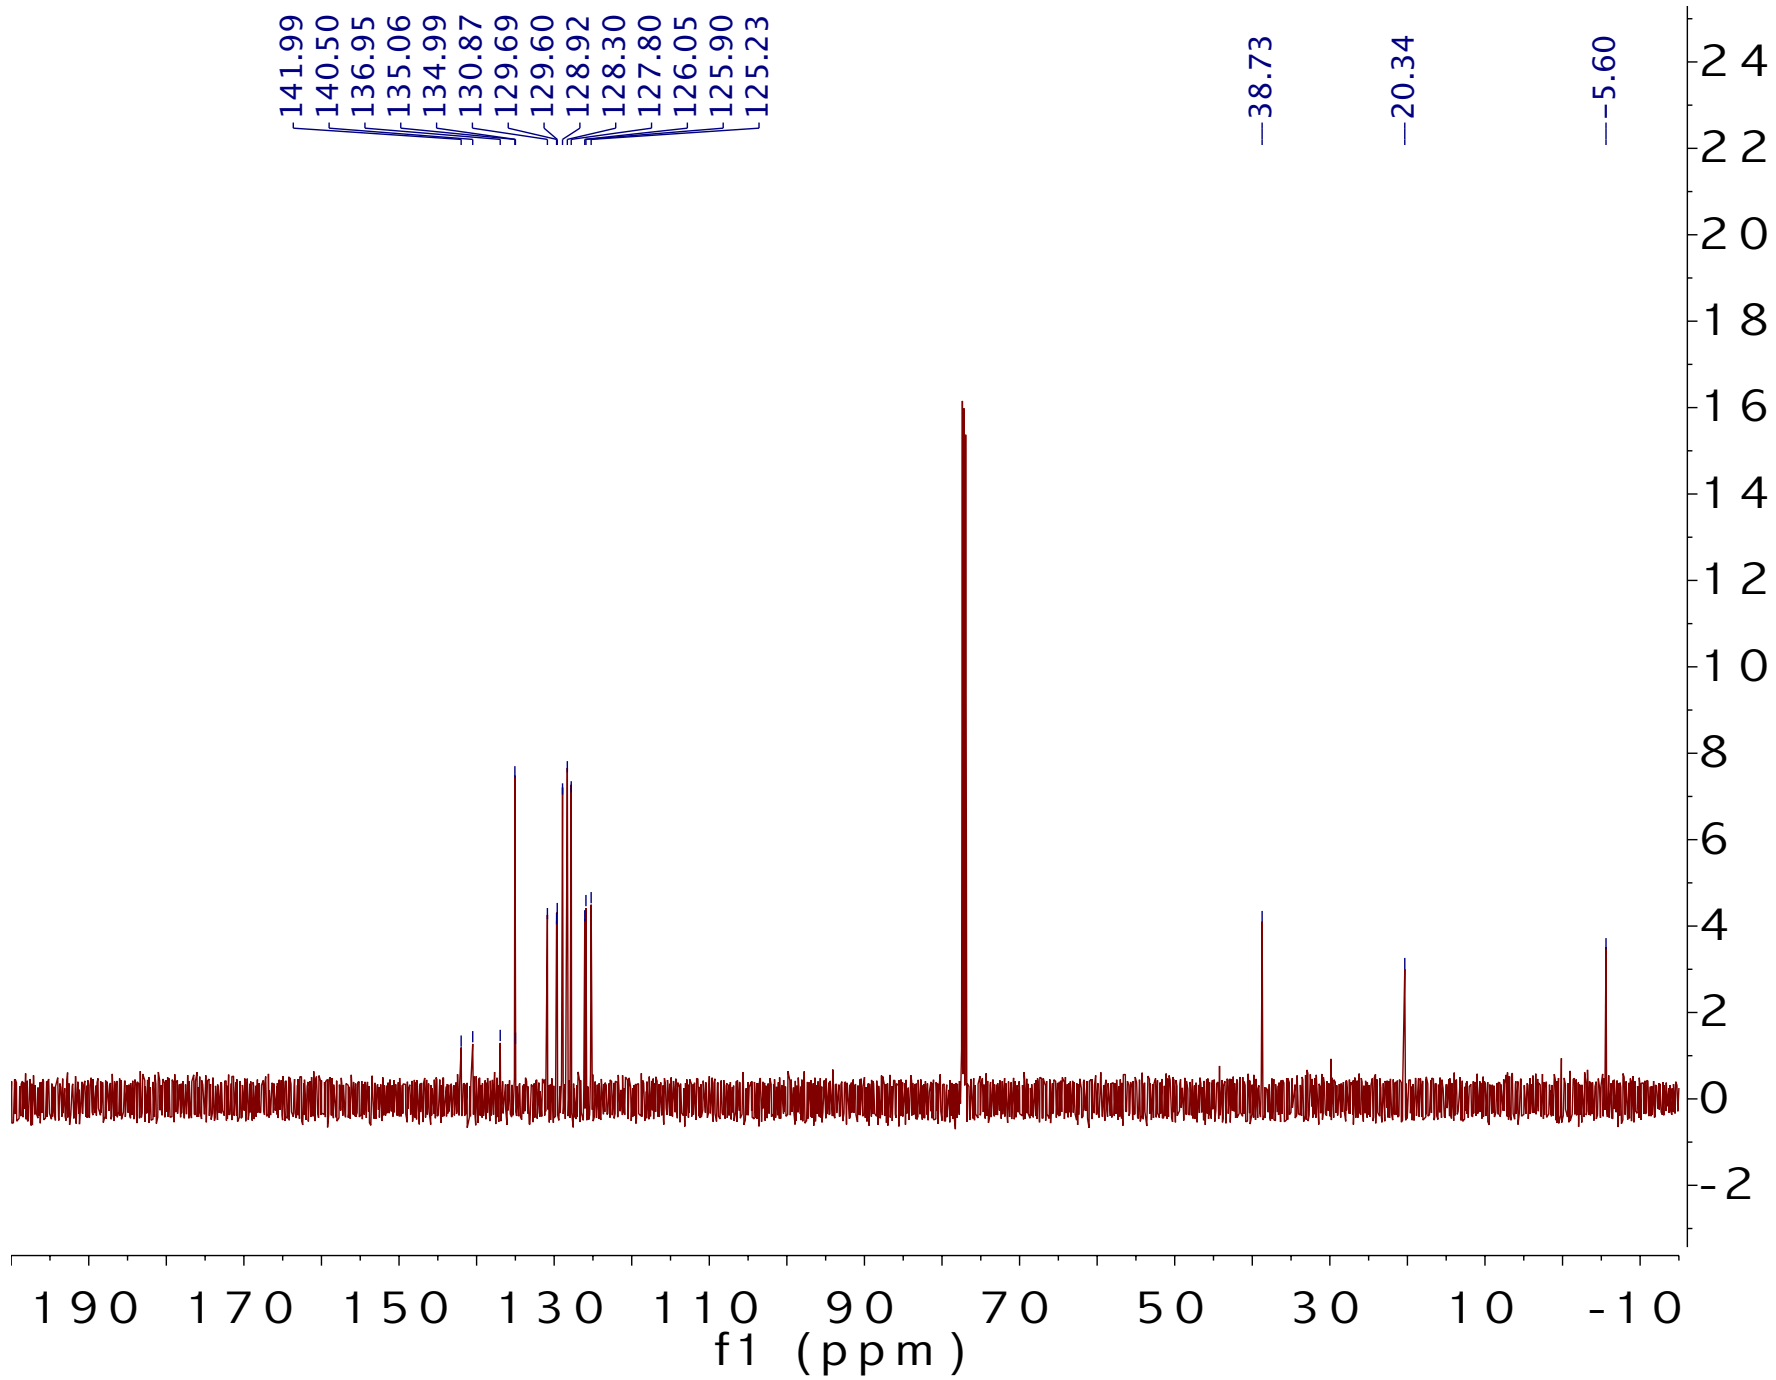

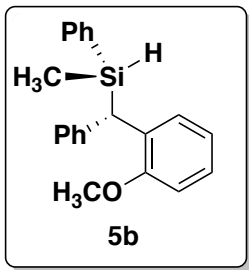

$^1\text{H}$ , 600 MHz,  $\text{CDCl}_3$

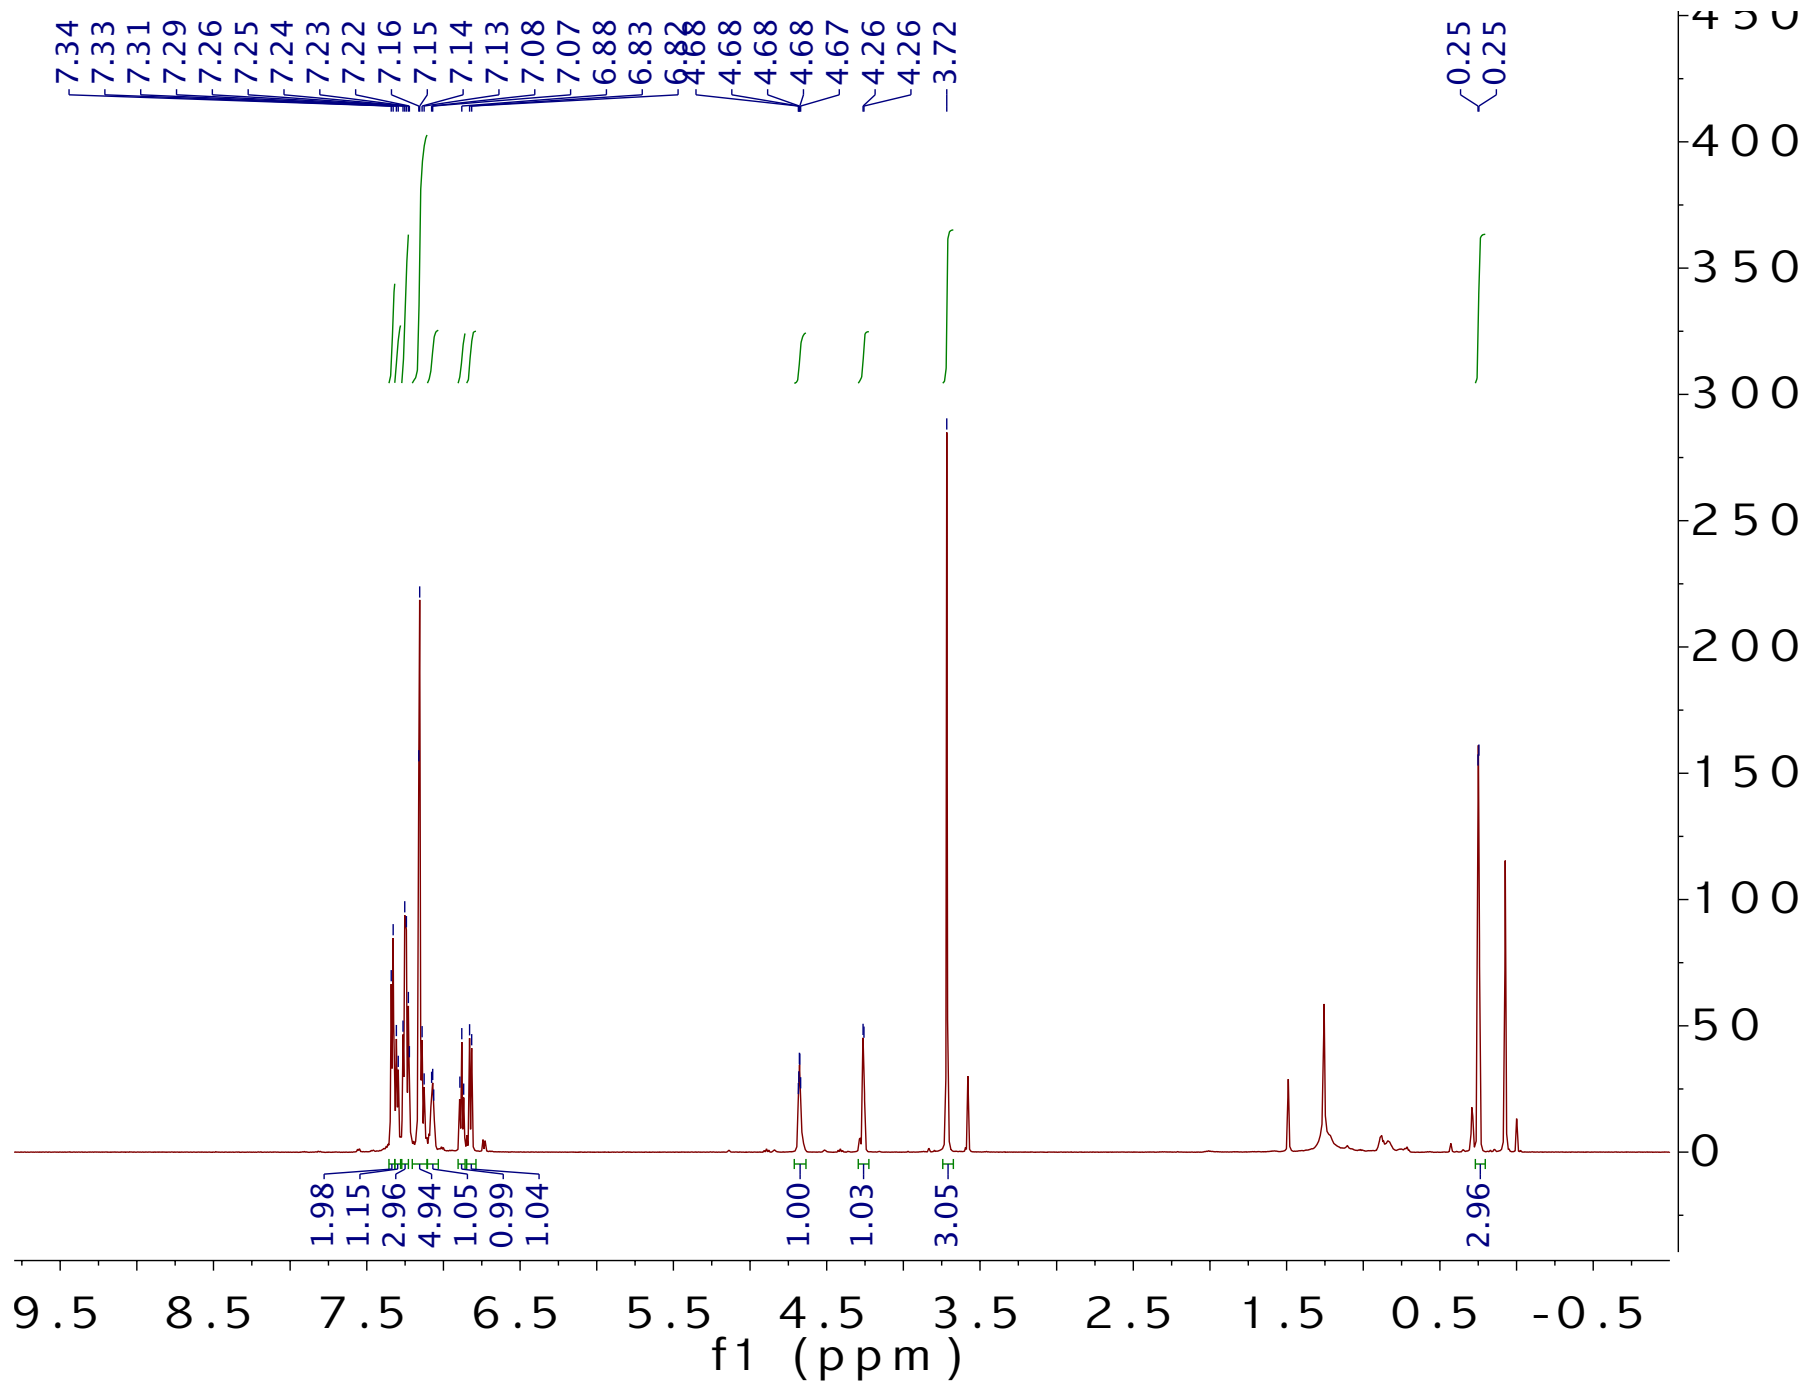

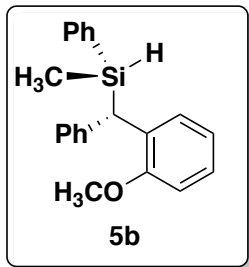

$^{13}\text{C}$ , 151 MHz,  $\text{CDCl}_3$

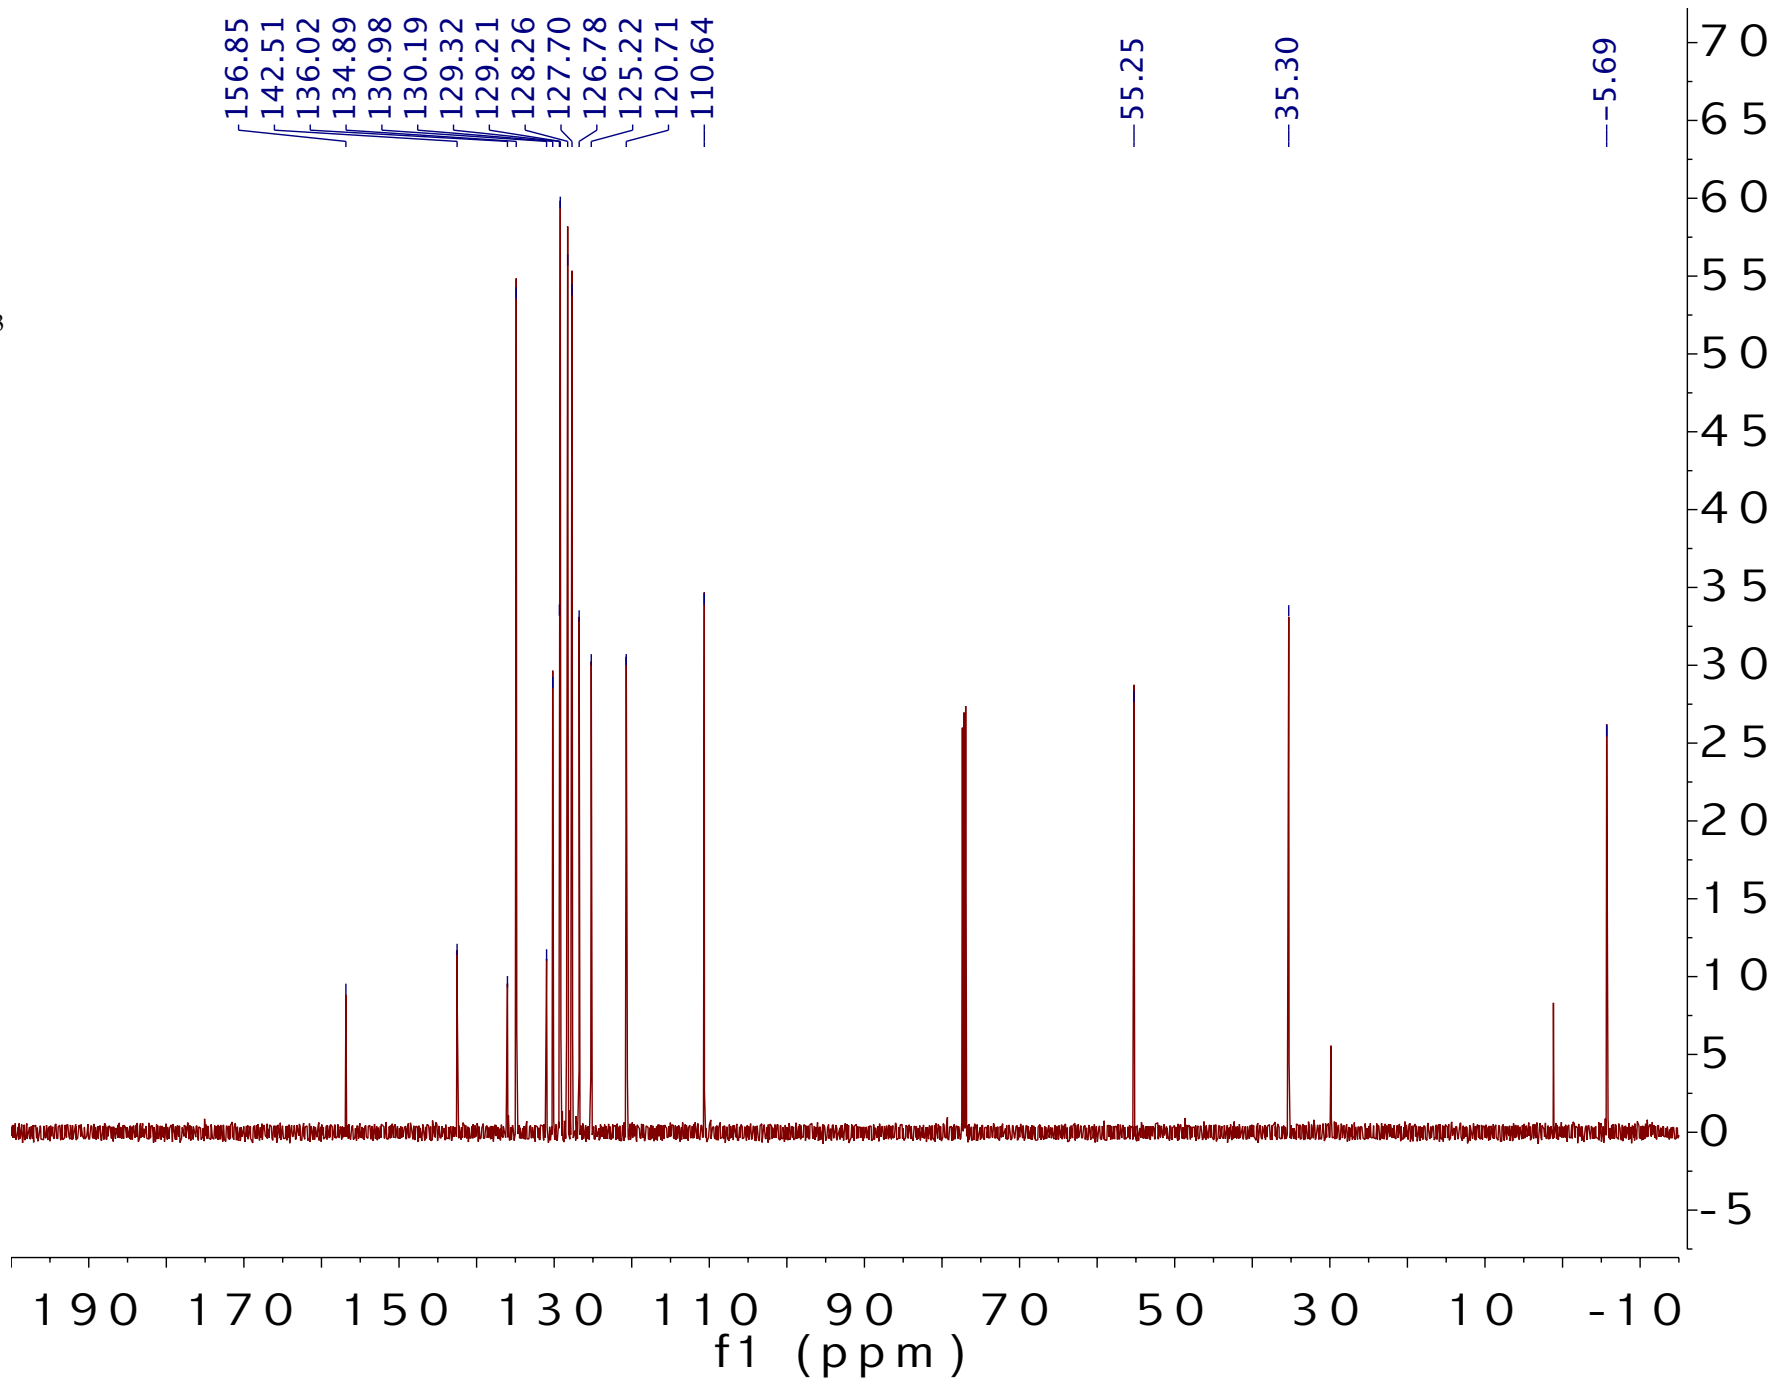



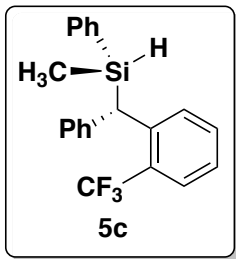

$^1\text{H}$ , 600 MHz,  $\text{CDCl}_3$

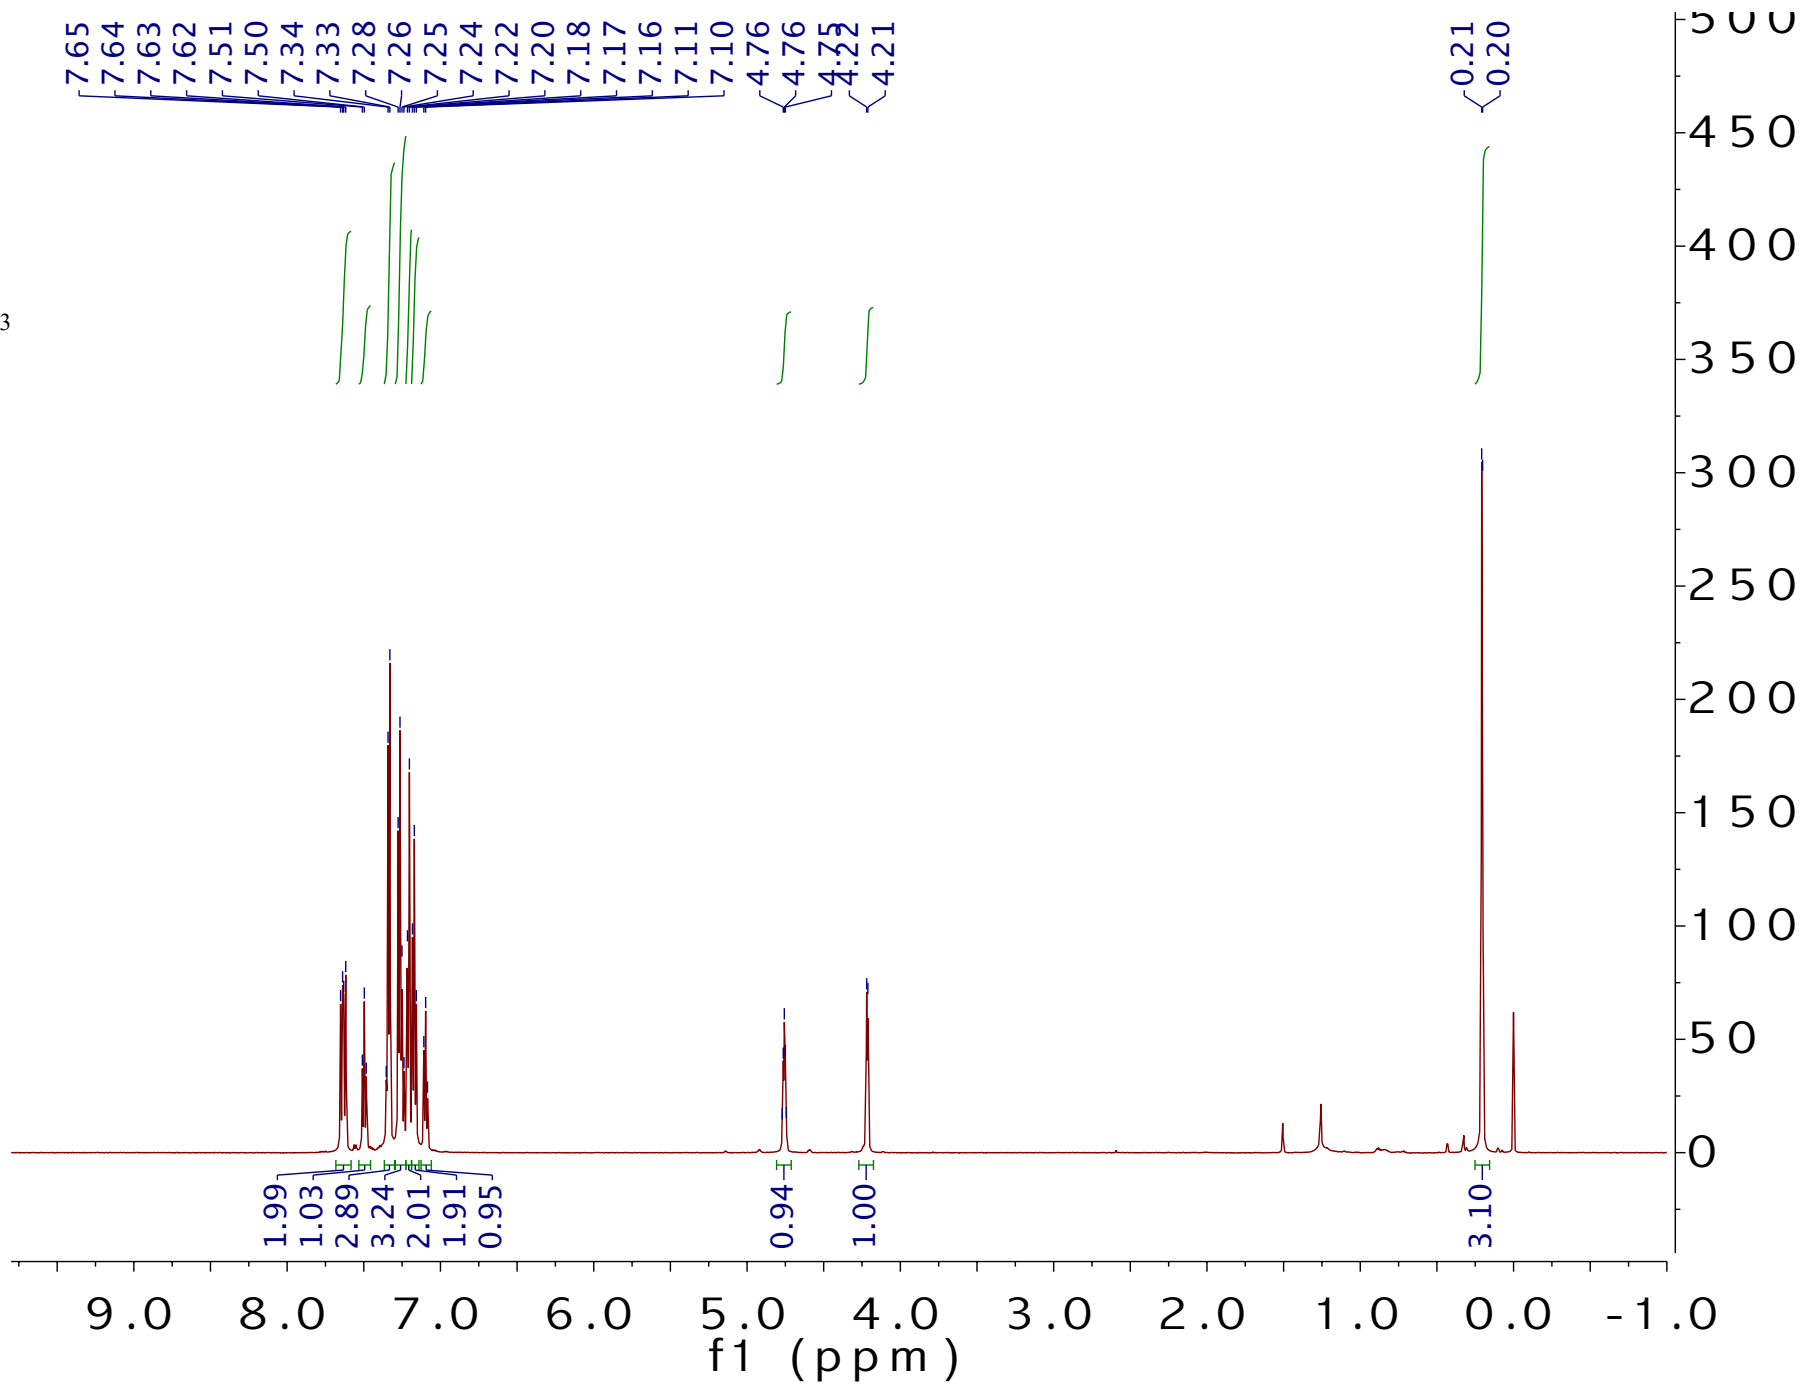

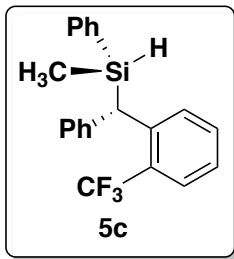

$^{13}\text{C}$ , 151 MHz,  $\text{CDCl}_3$

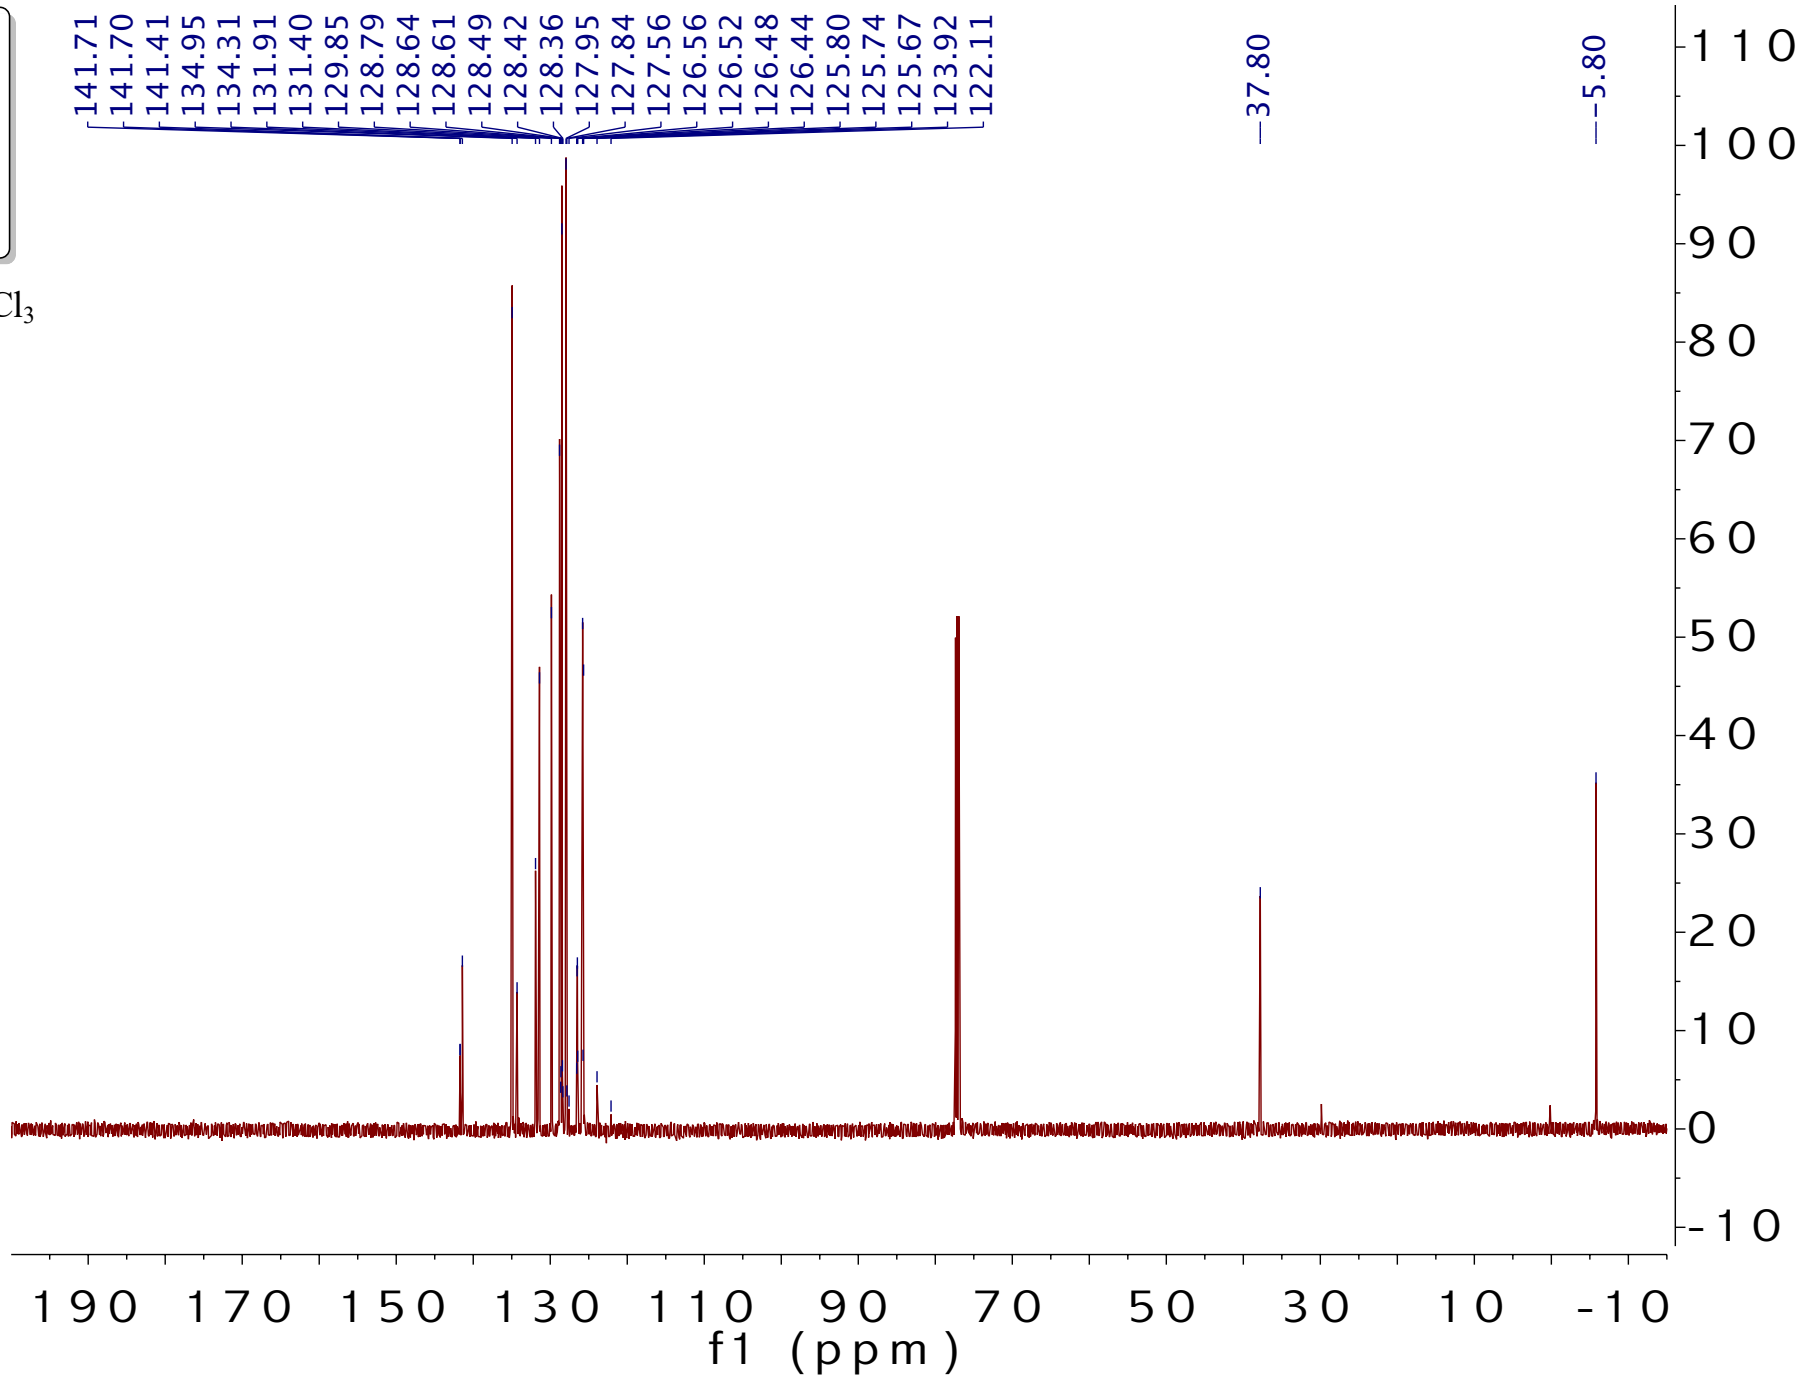

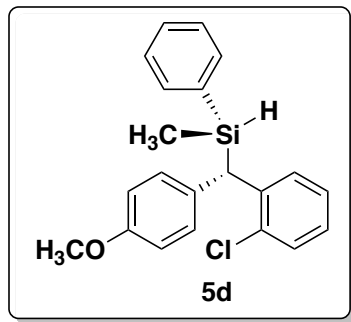

$^1\text{H}$ , 600 MHz,  $\text{CDCl}_3$

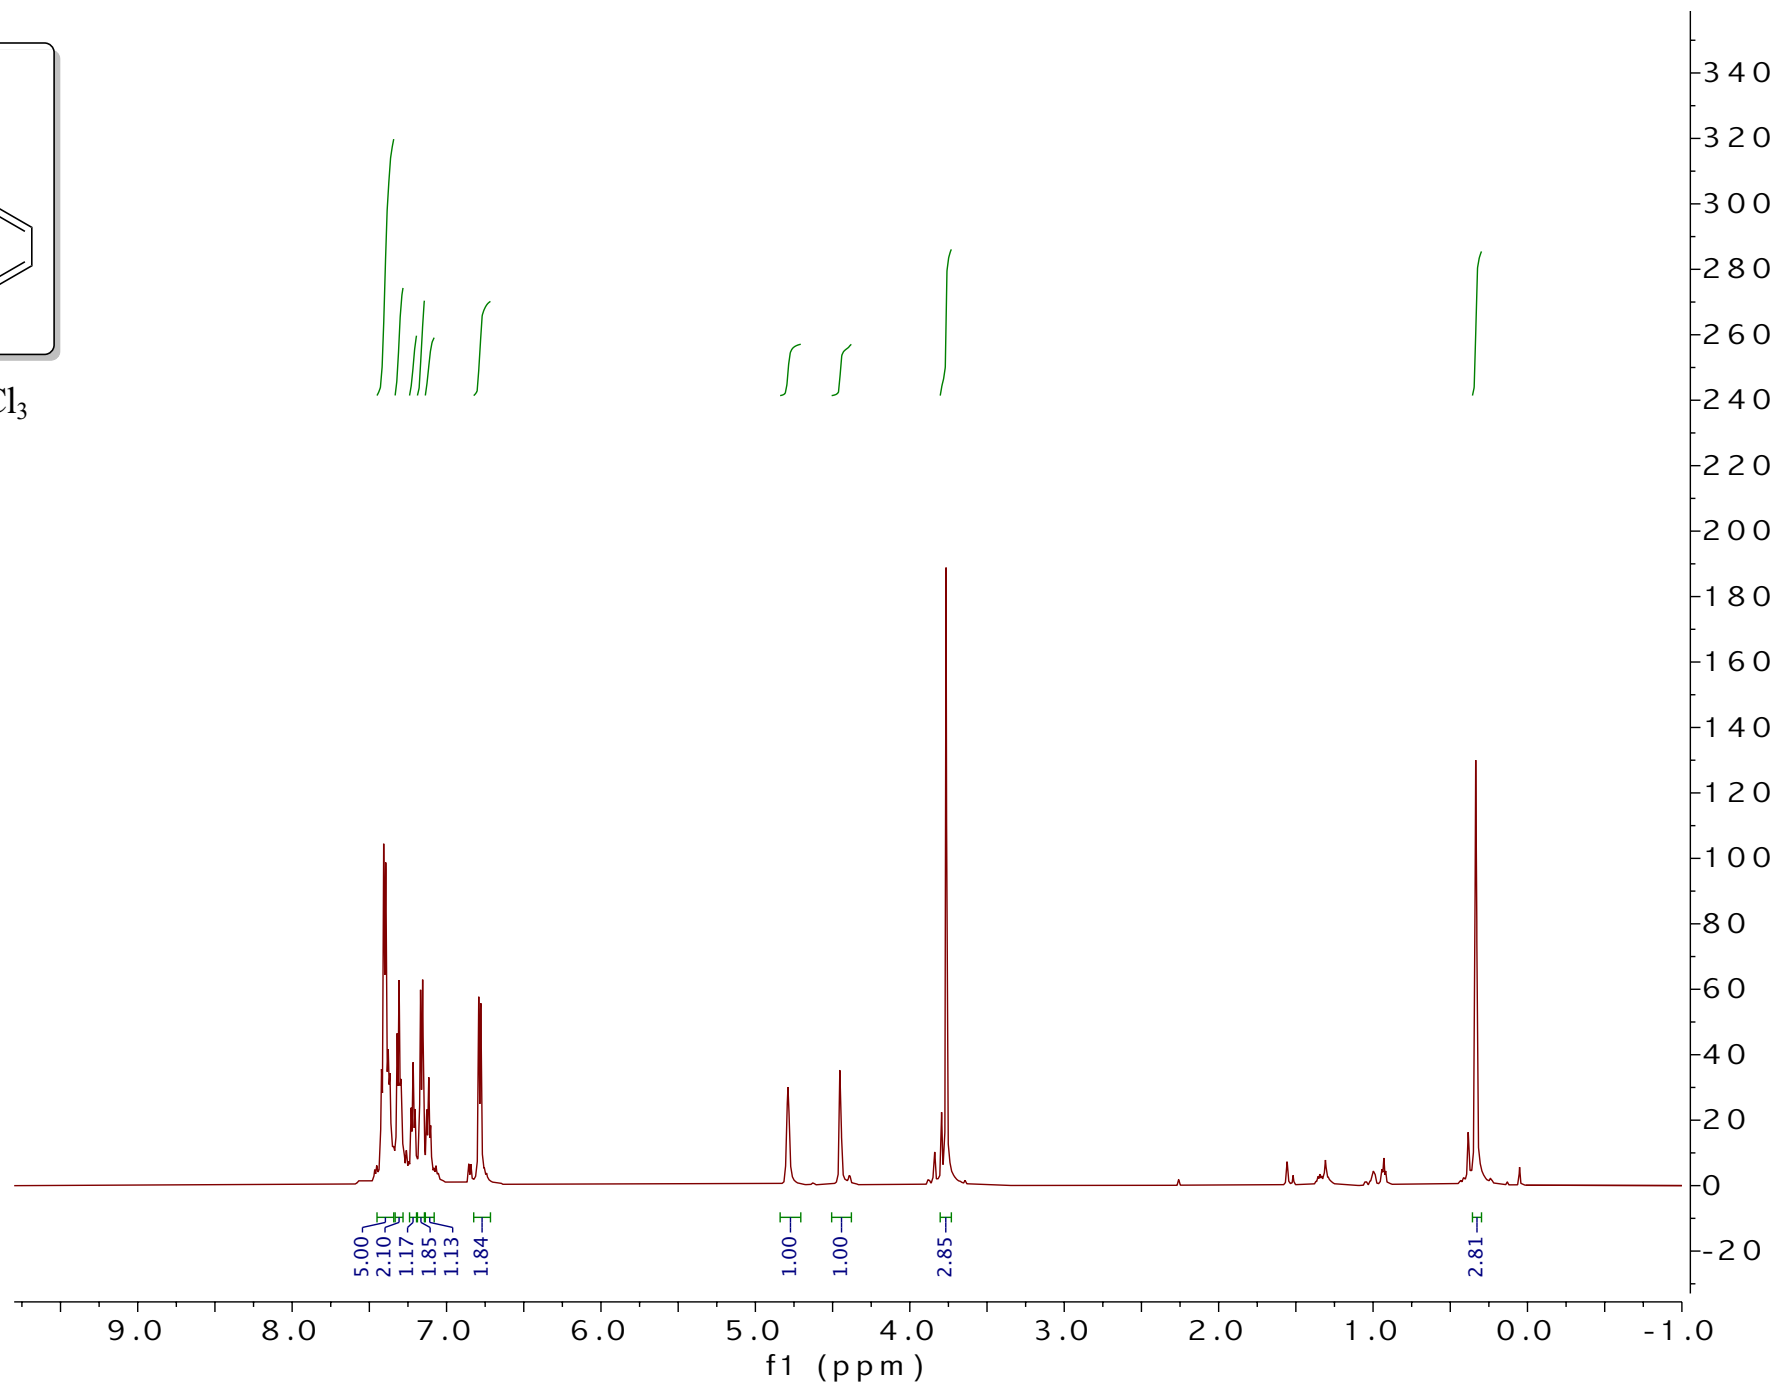

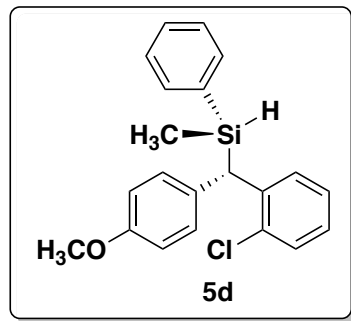

$^{13}\text{C}$ , 151 MHz,  $\text{CDCl}_3$

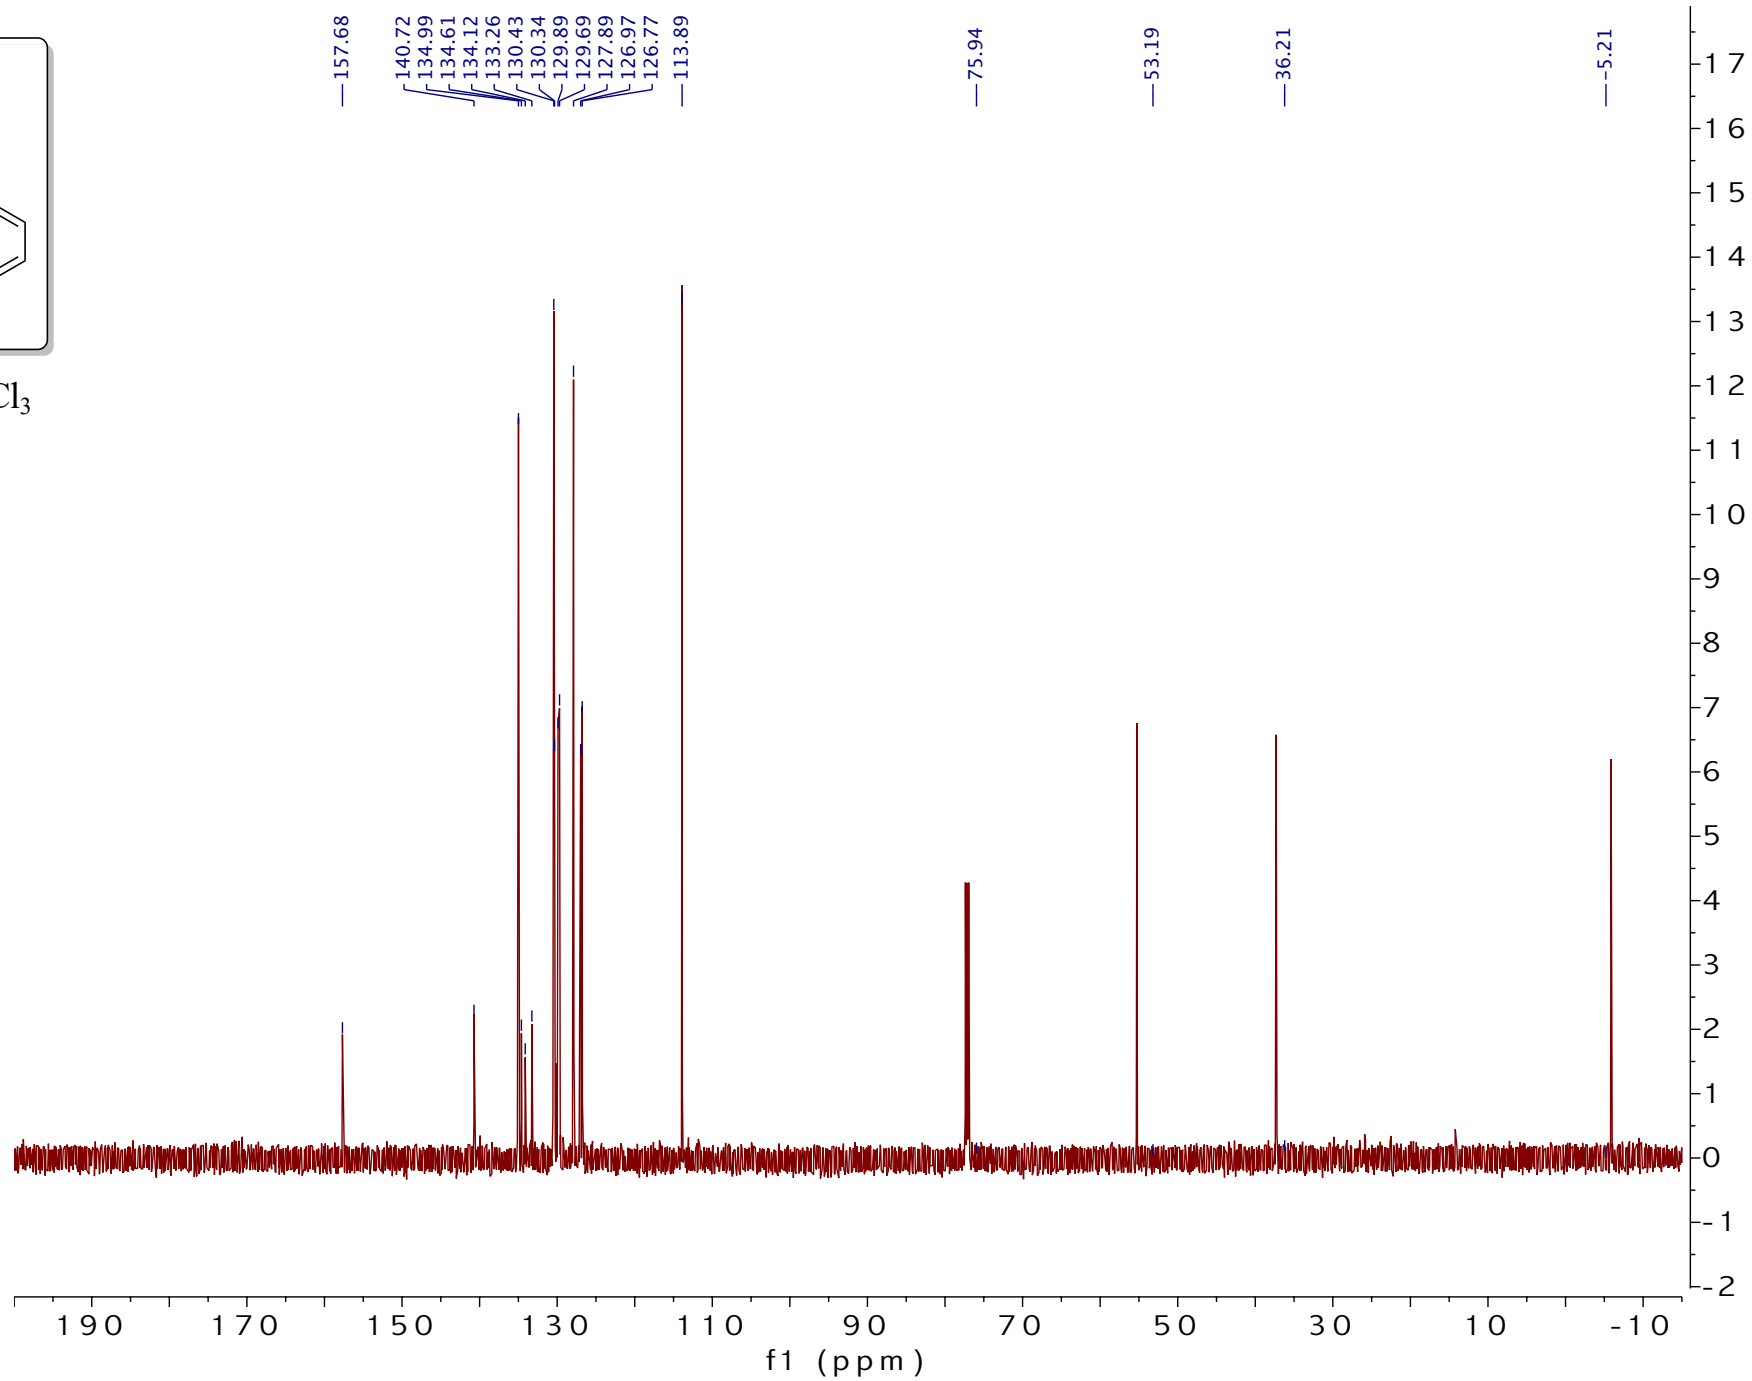

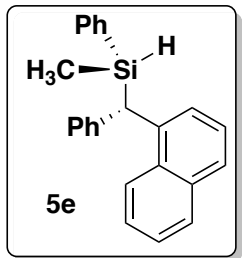

$^1\text{H}$ , 600 MHz,  $\text{CDCl}_3$

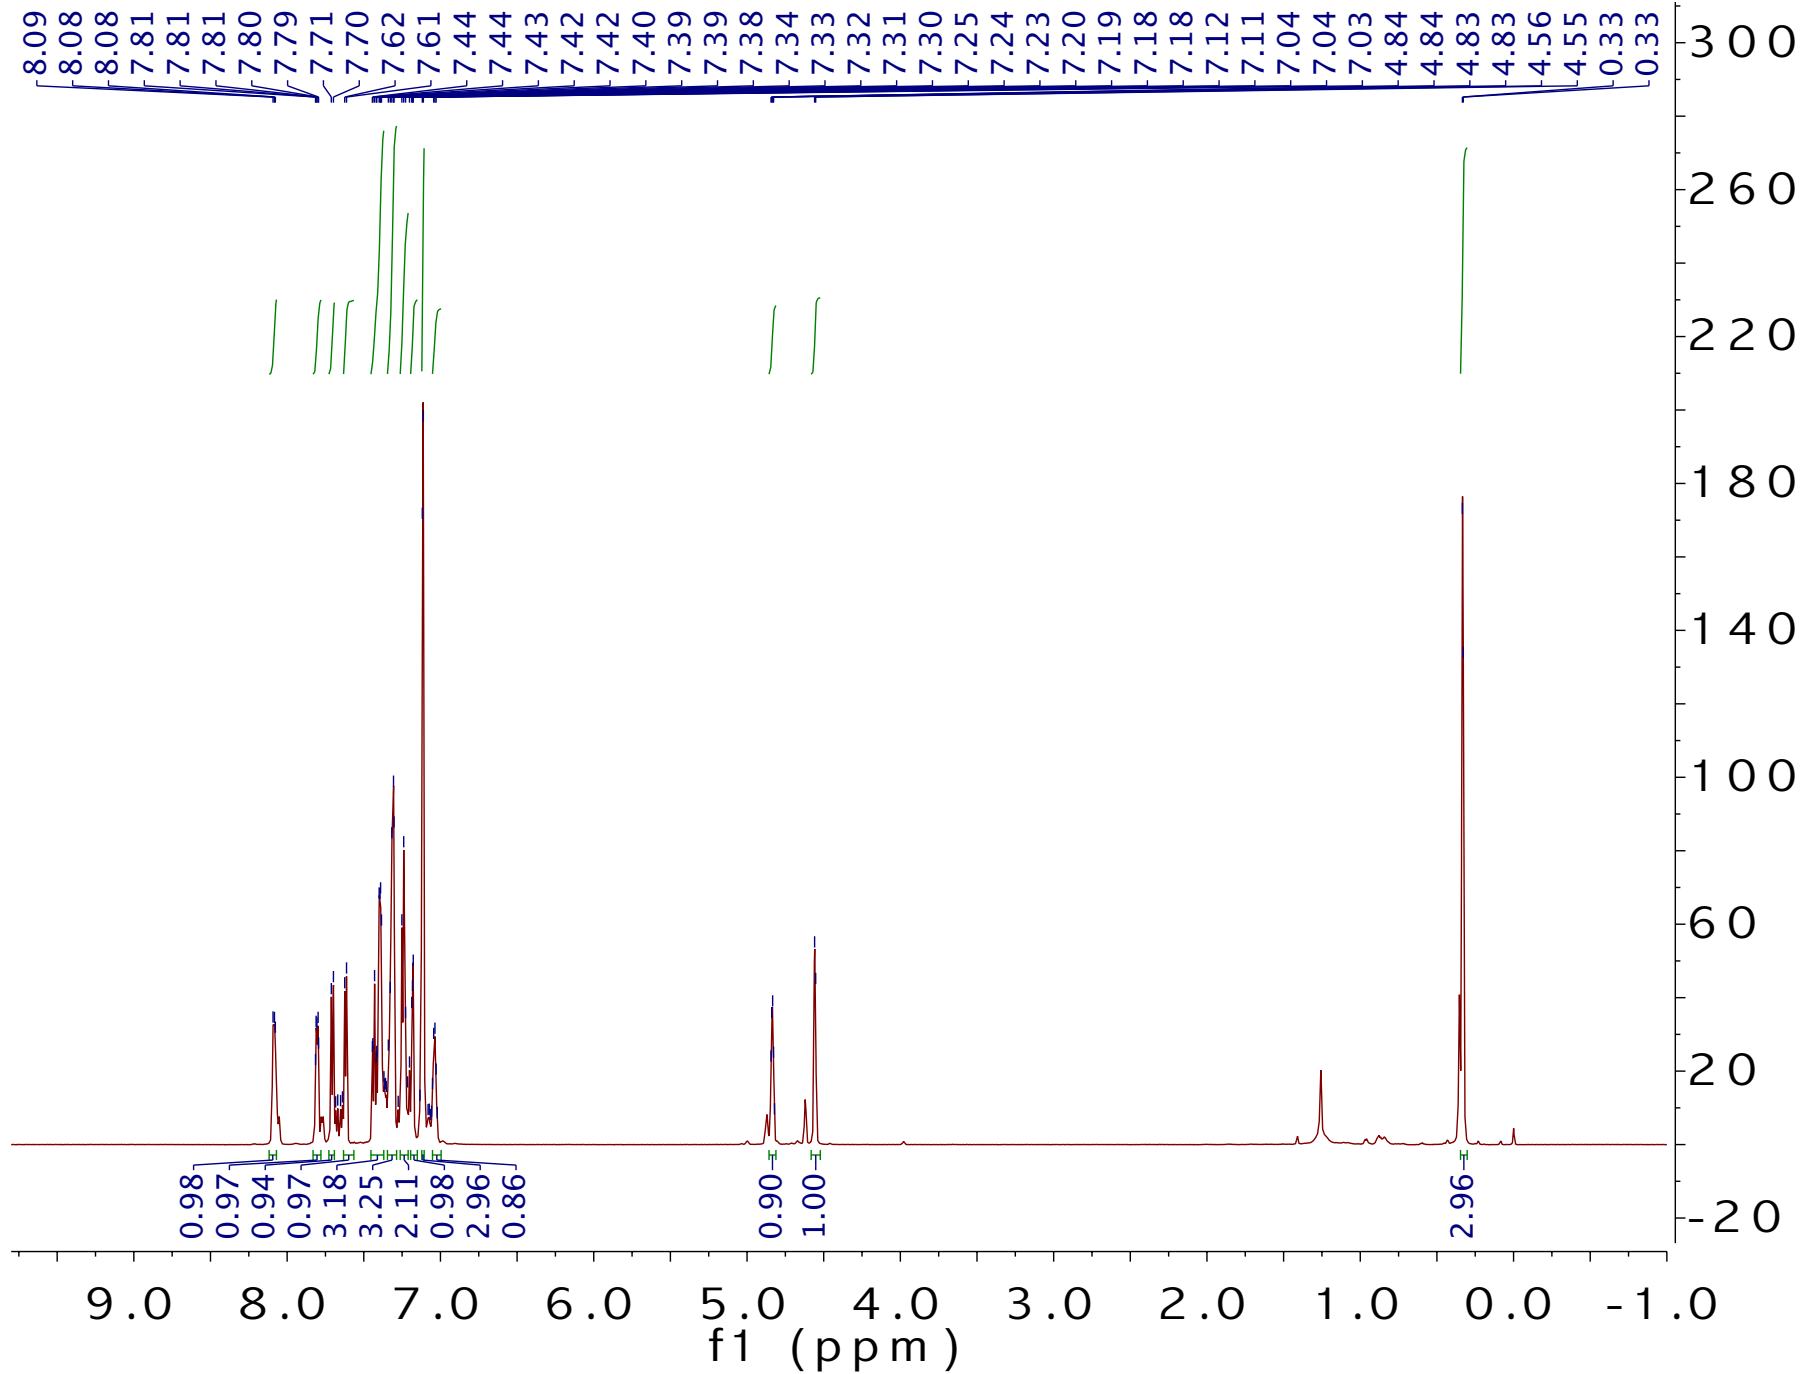

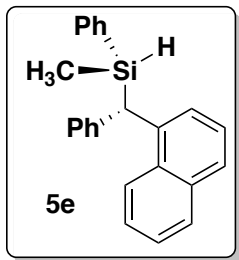

$^{13}\text{C}$ , 151 MHz,  $\text{CDCl}_3$

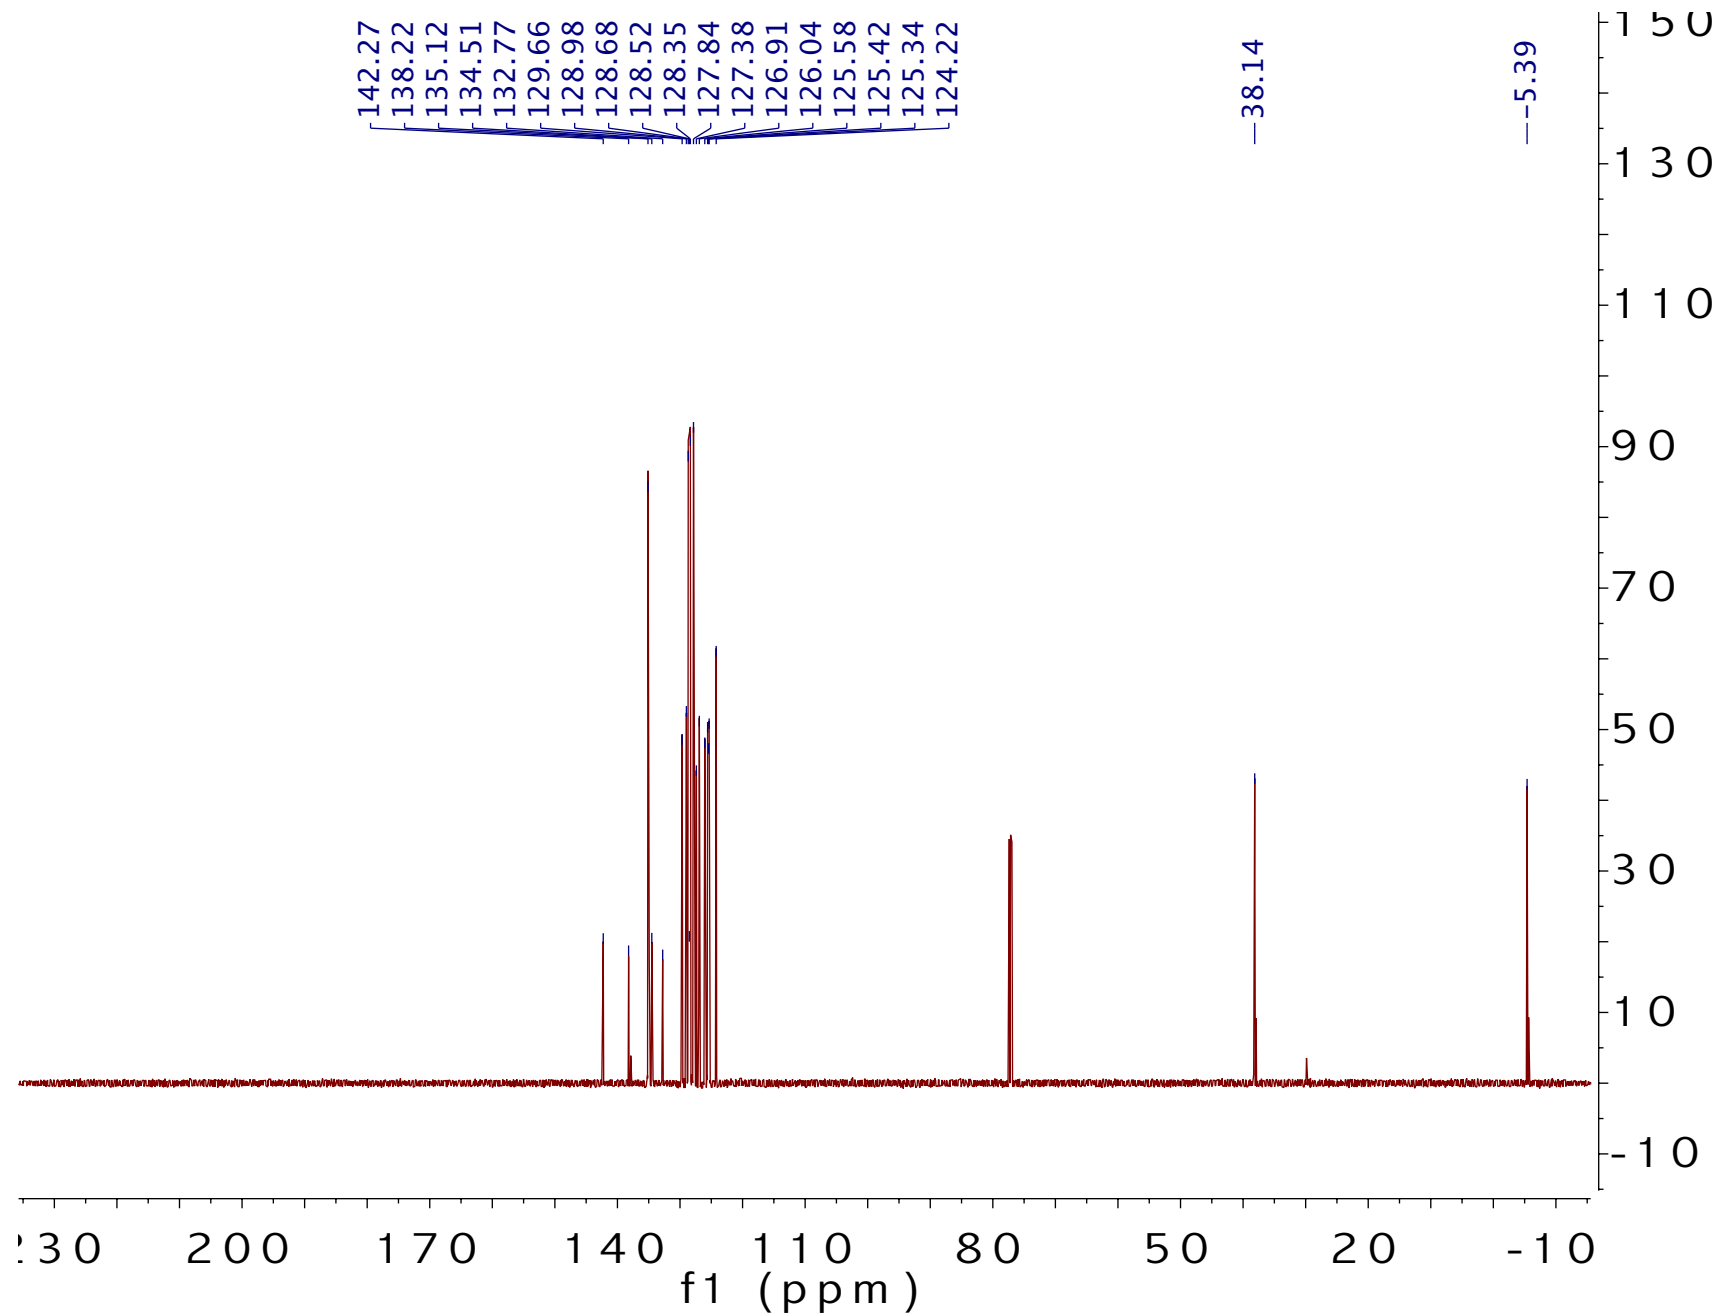

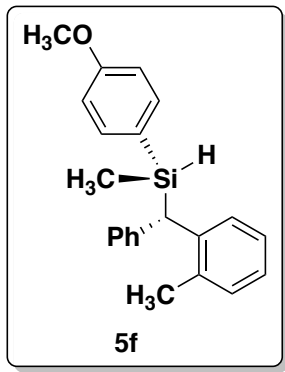

$^1\text{H}$ , 400 MHz,  $\text{CDCl}_3$

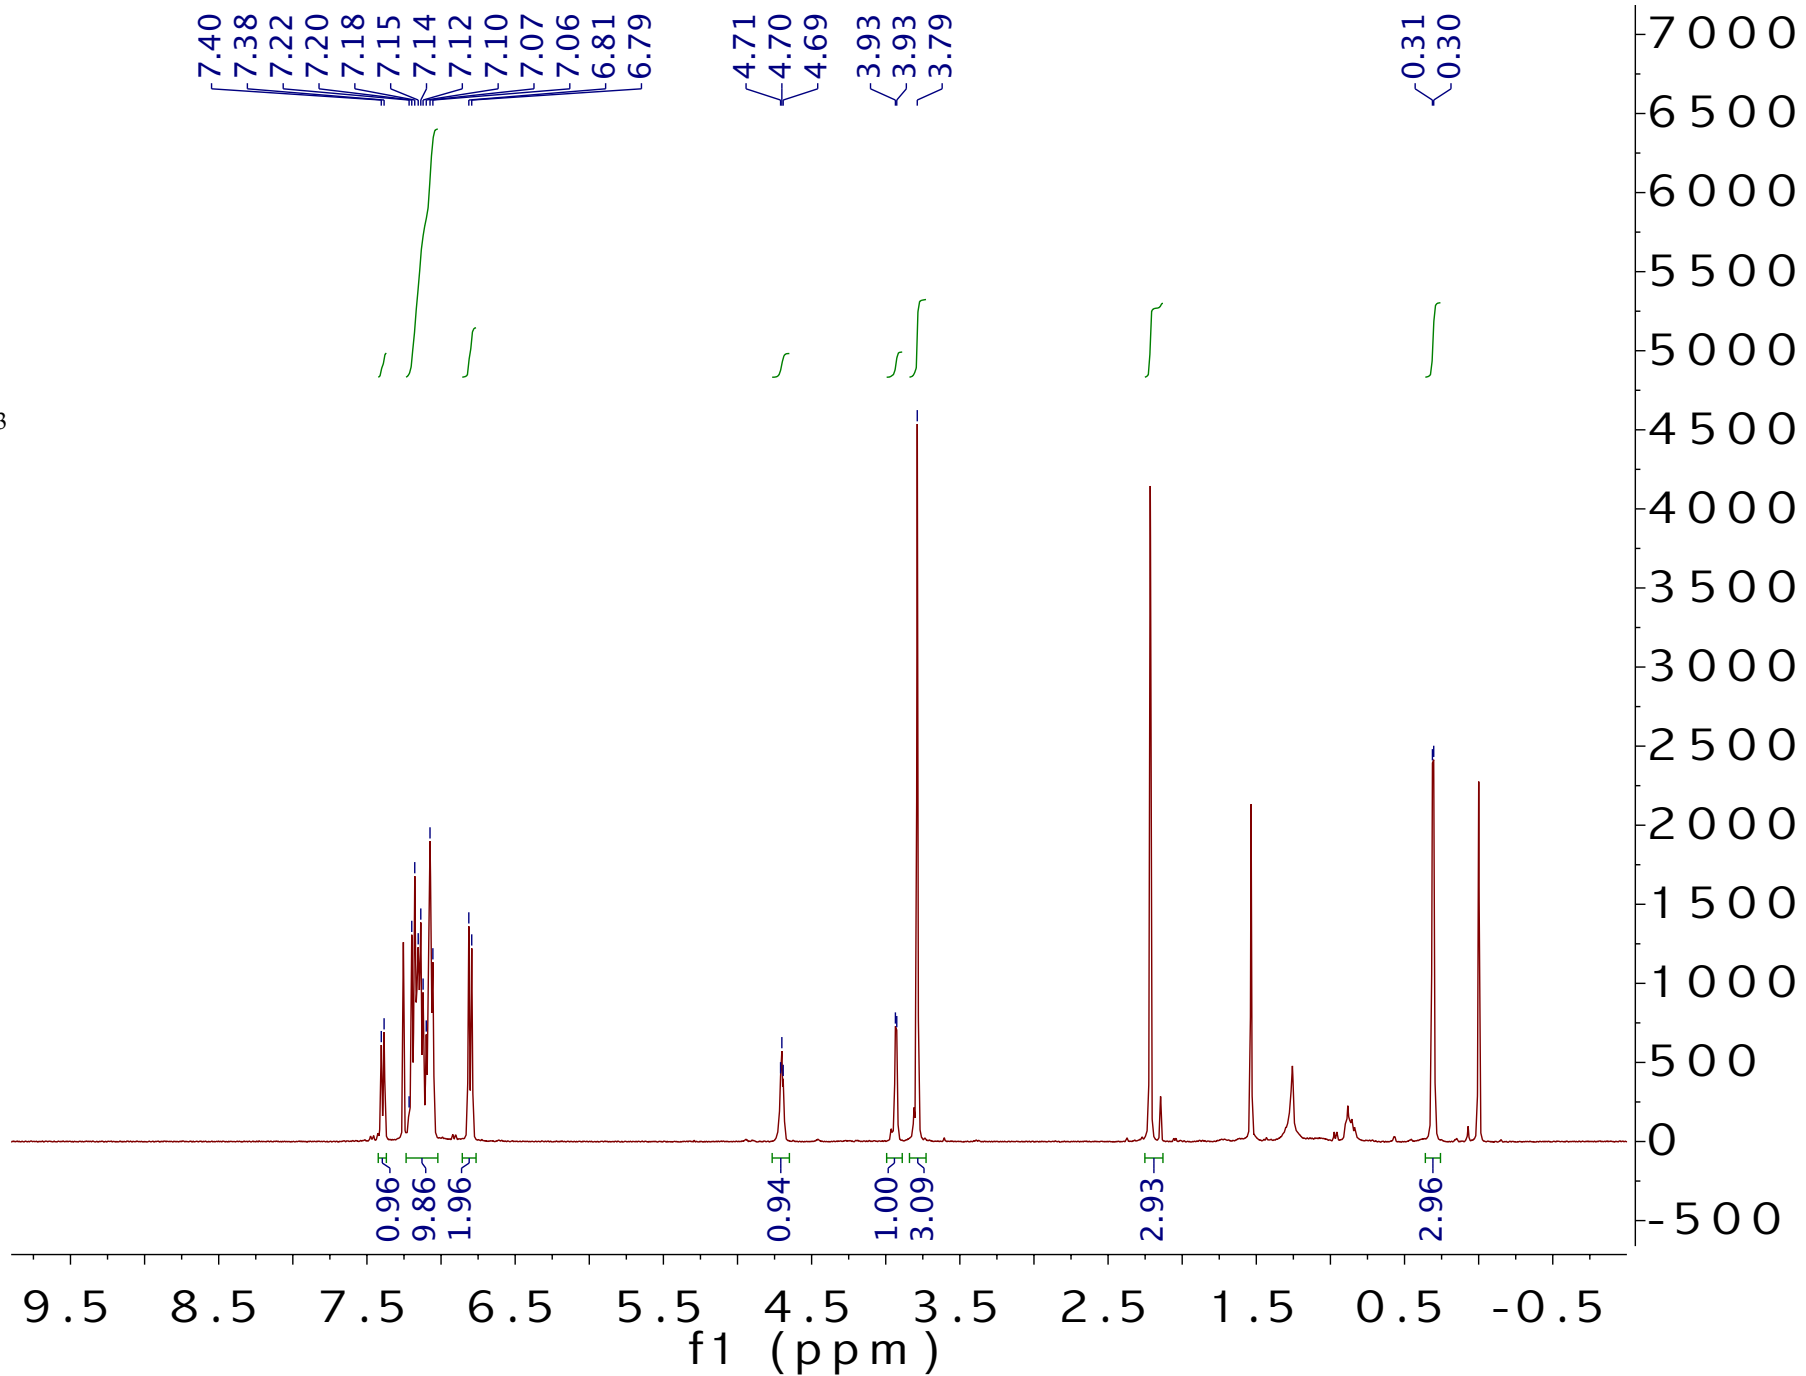

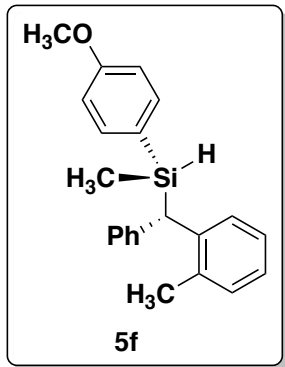

$^{13}\text{C}$ , 151 MHz,  $\text{CDCl}_3$

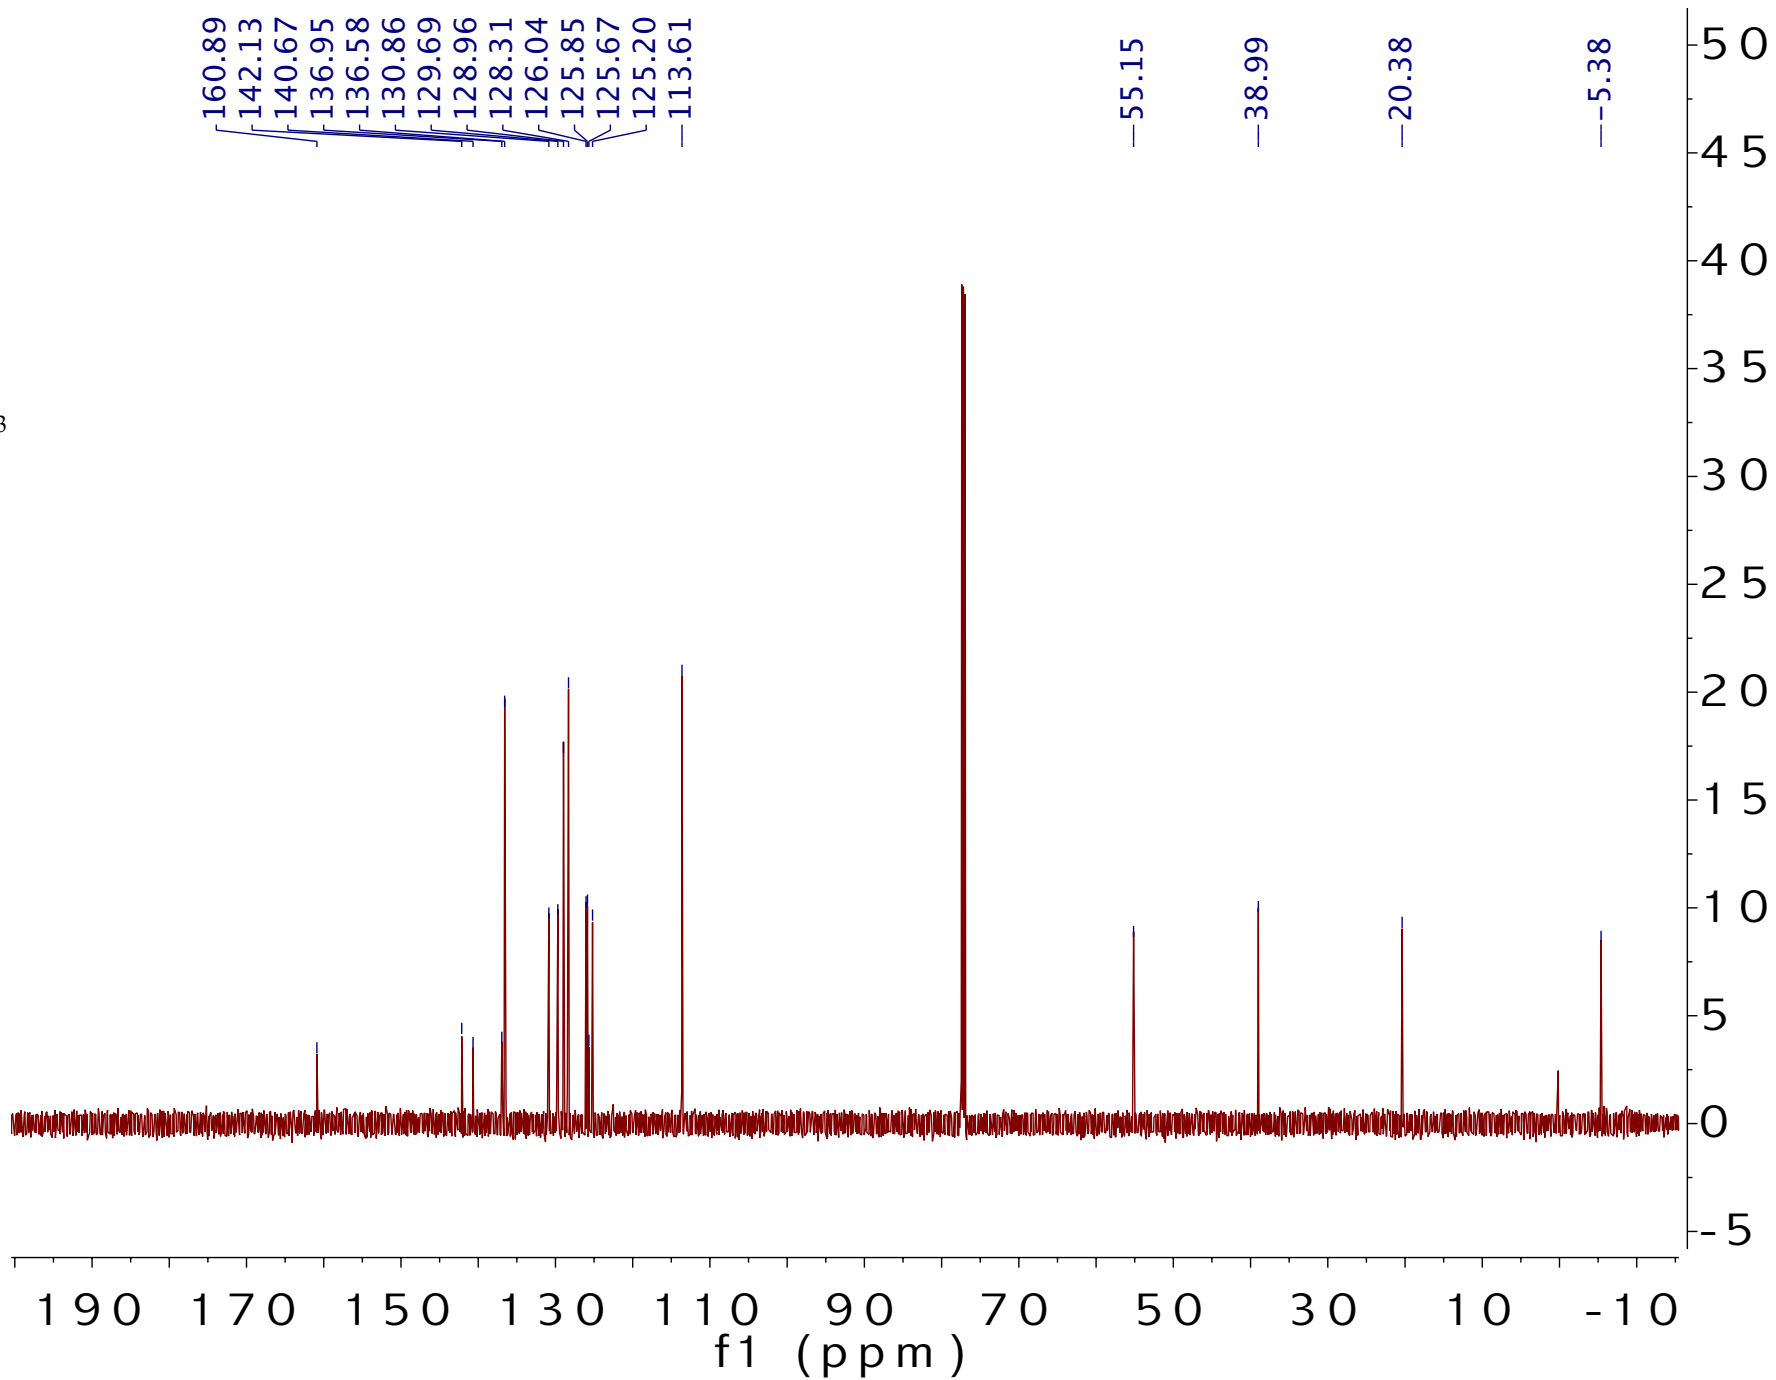



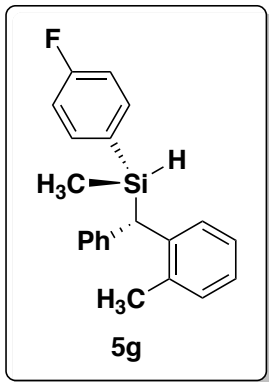

$^1\text{H}$ , 600 MHz,  $\text{CDCl}_3$

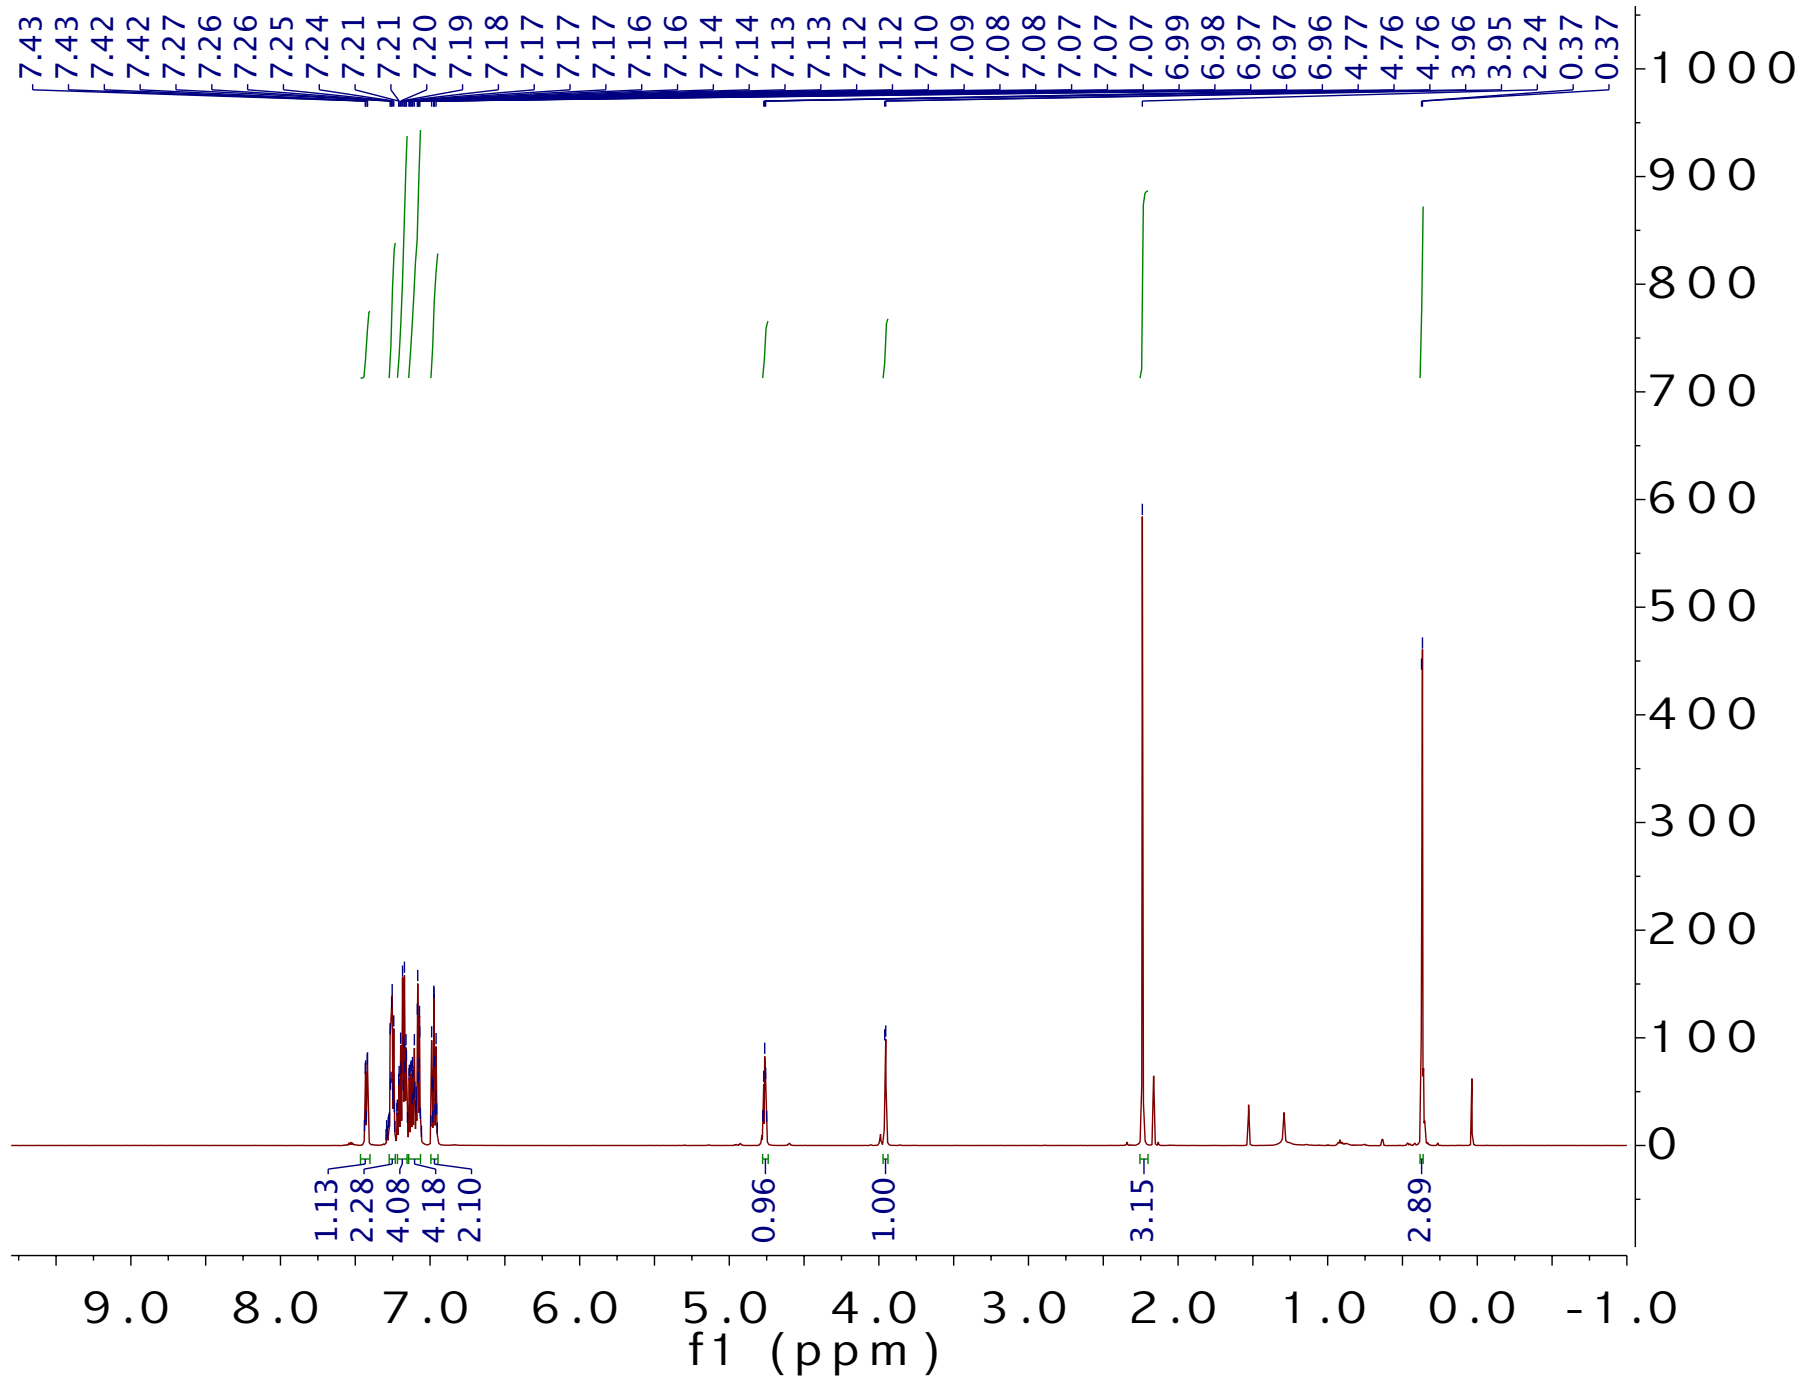

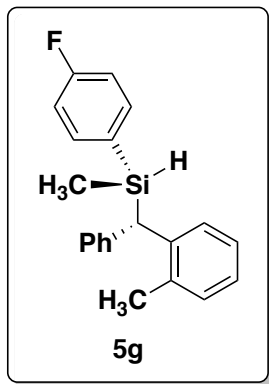

$^{13}\text{C}$ , 151 MHz,  $\text{CDCl}_3$

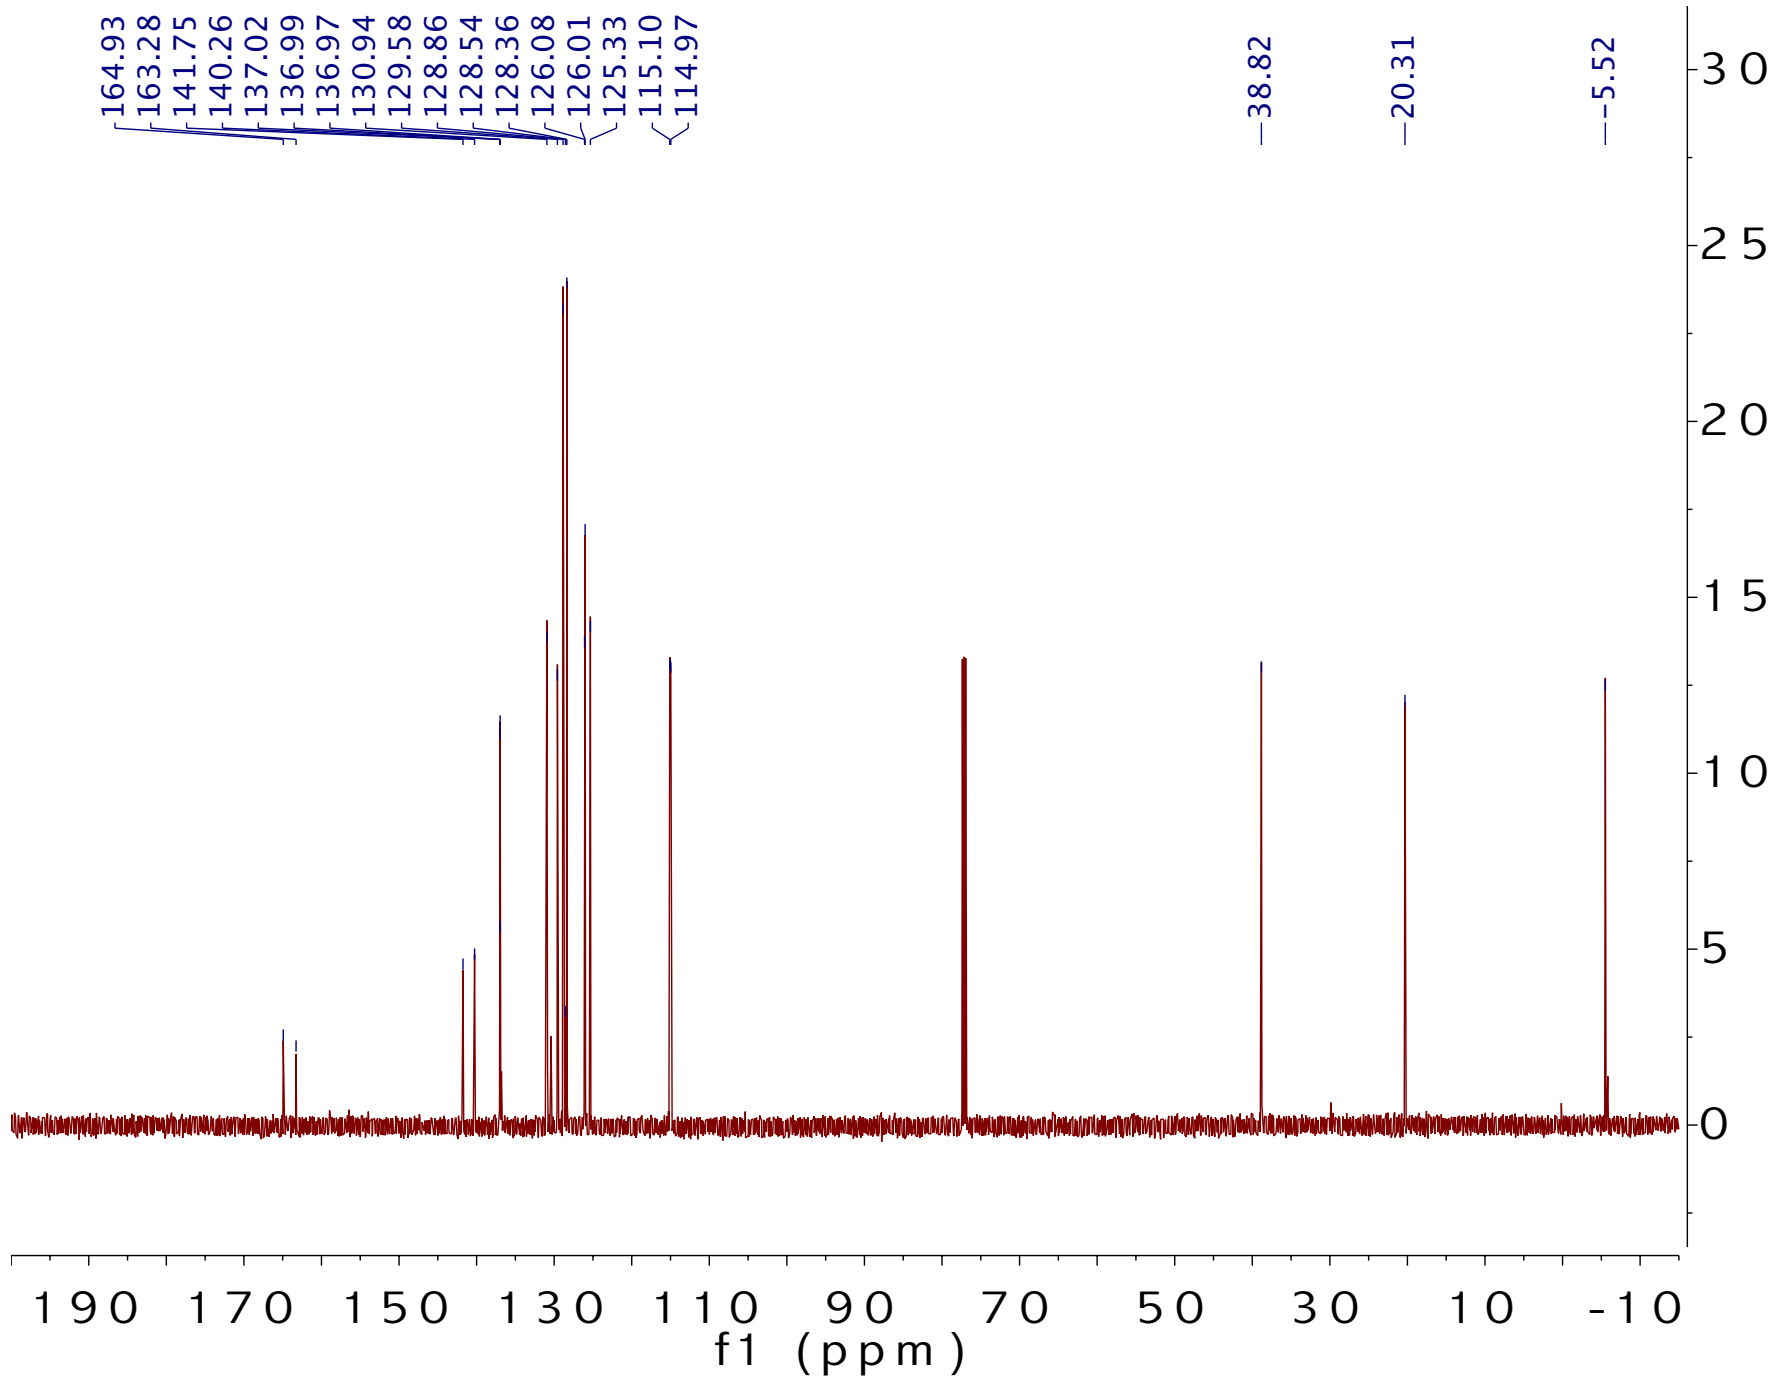

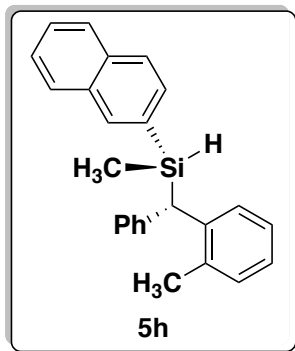

$^1\text{H}$ , 600 MHz,  $\text{CDCl}_3$

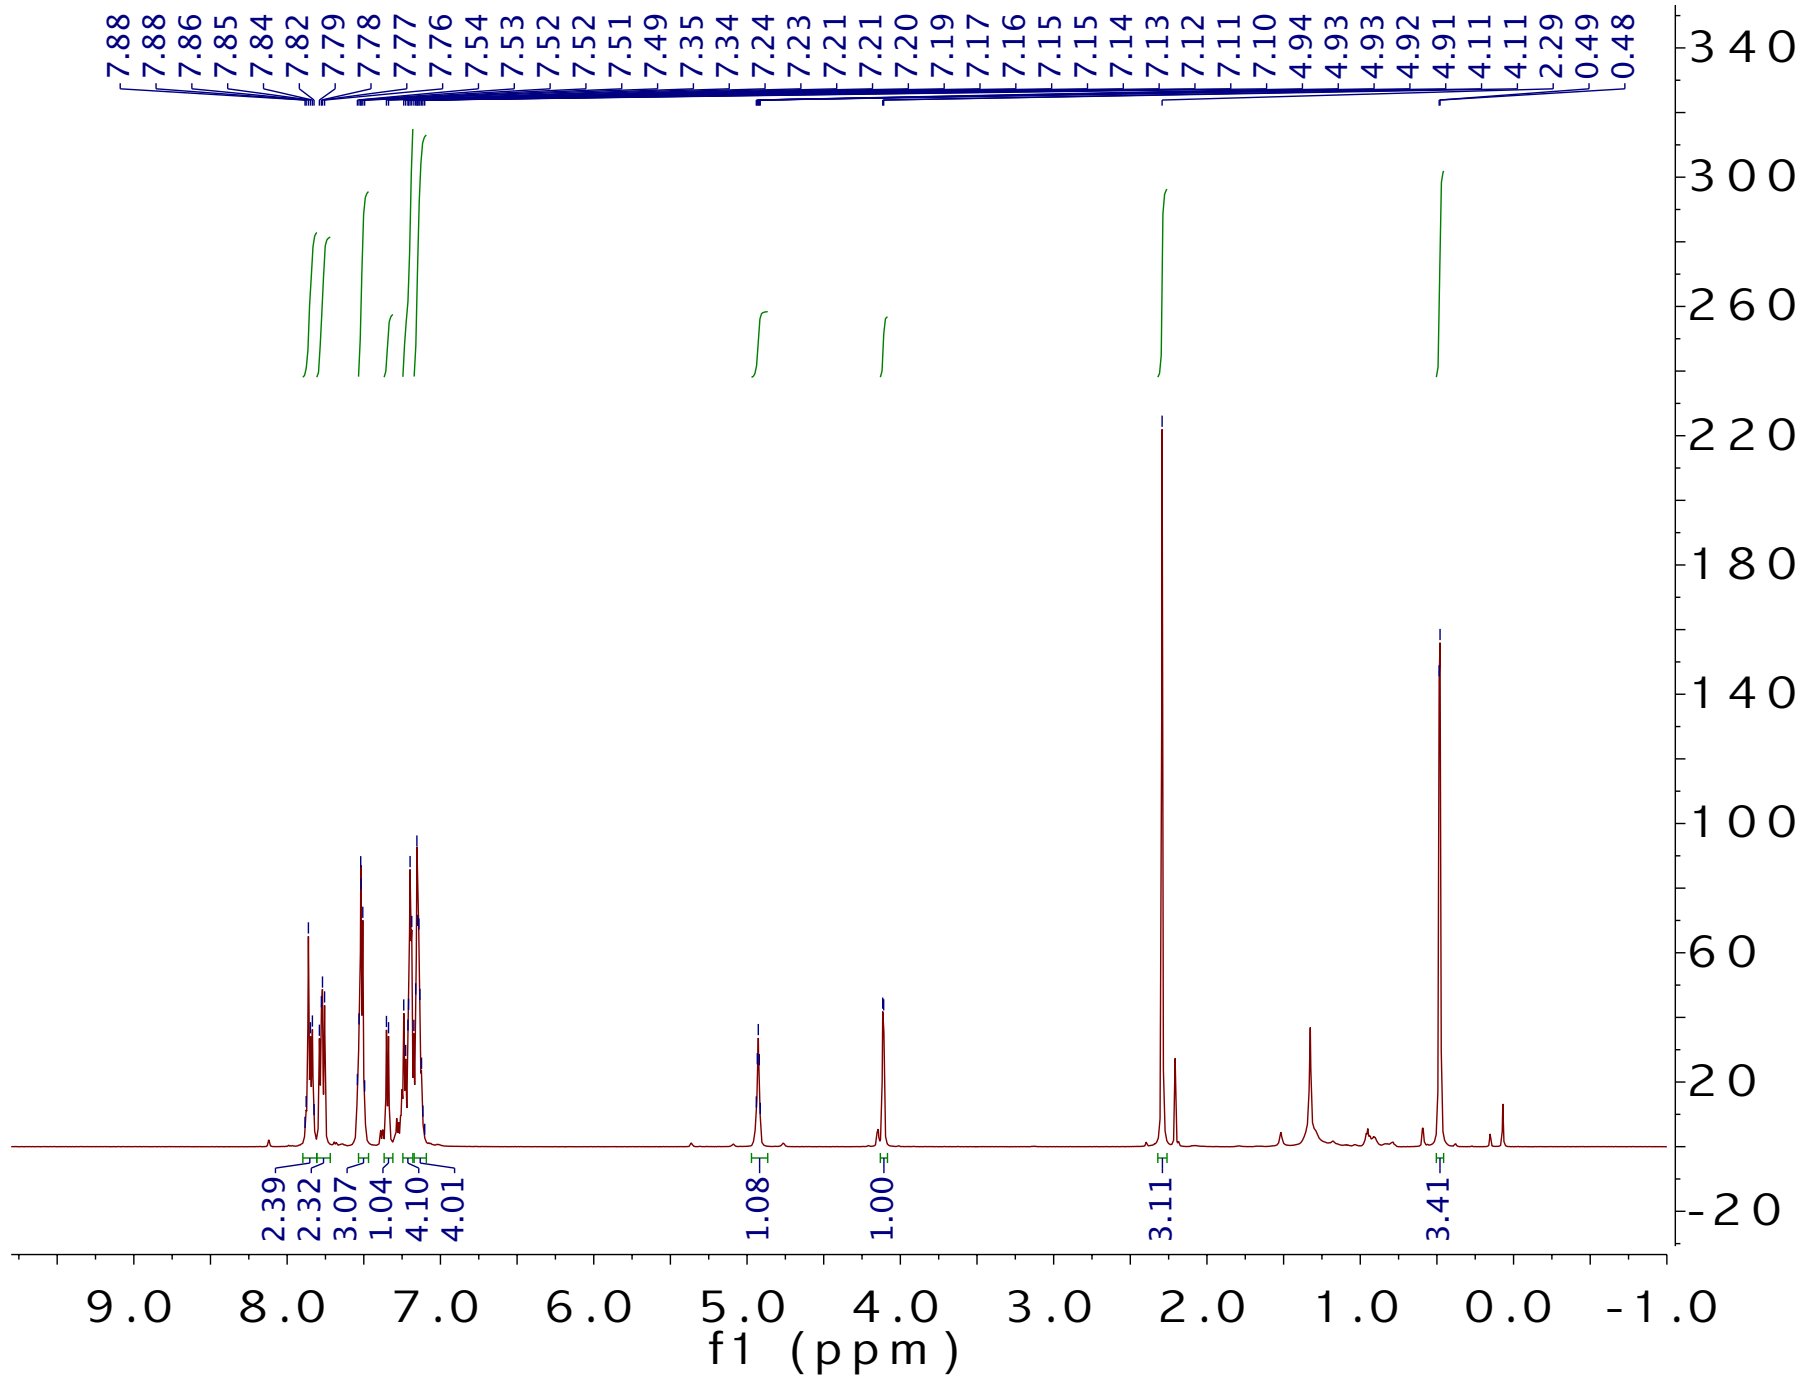

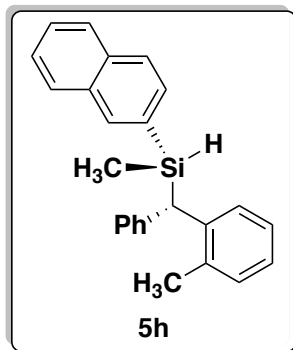

$^{13}\text{C}$ , 151 MHz,  $\text{CDCl}_3$

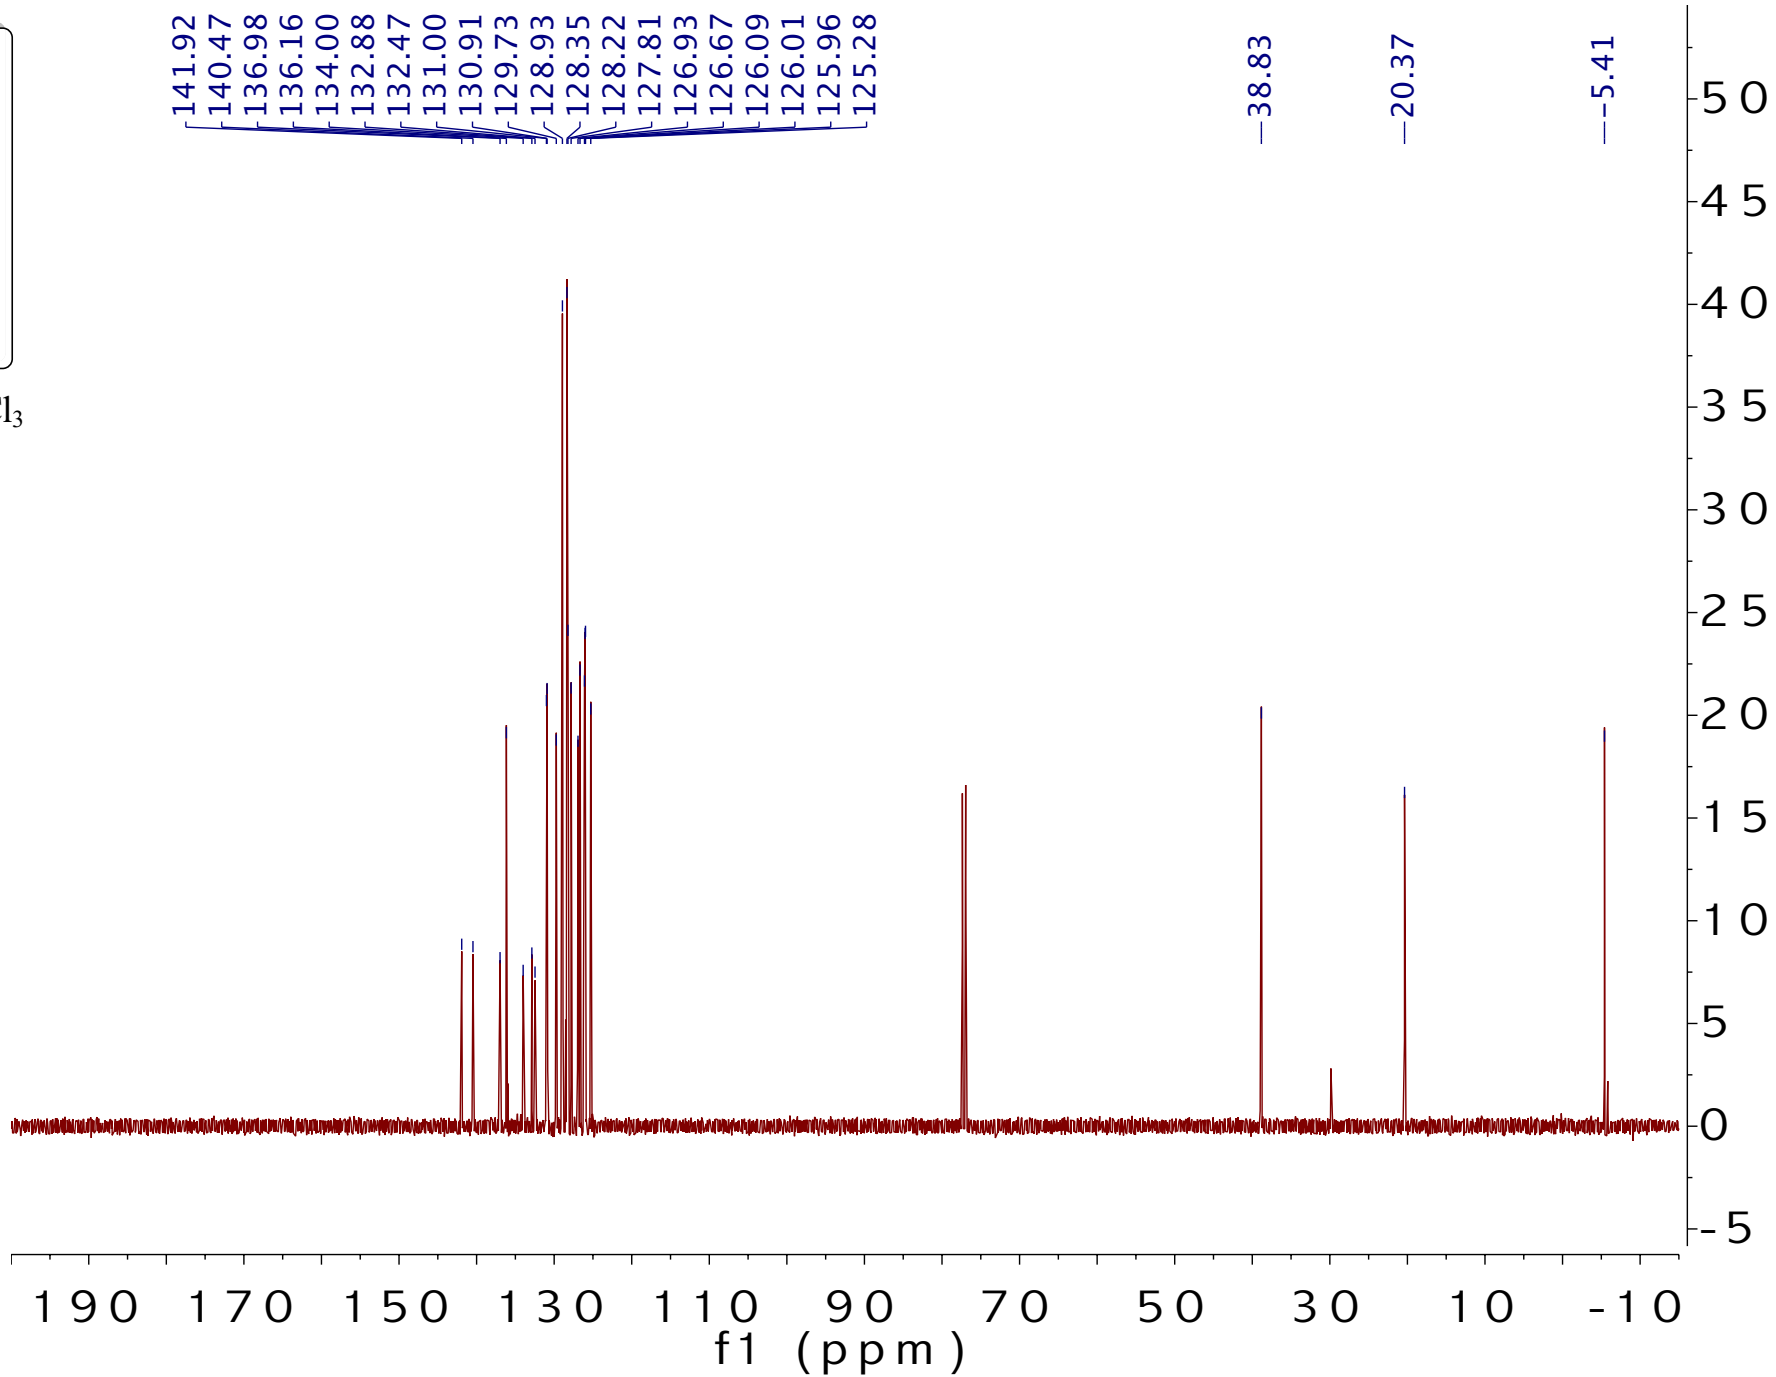

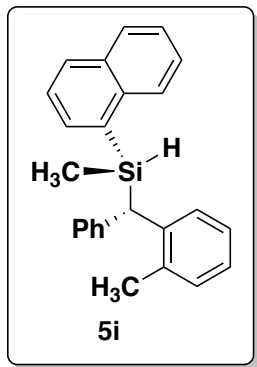

$^1\text{H}$ , 400 MHz,  $\text{CDCl}_3$

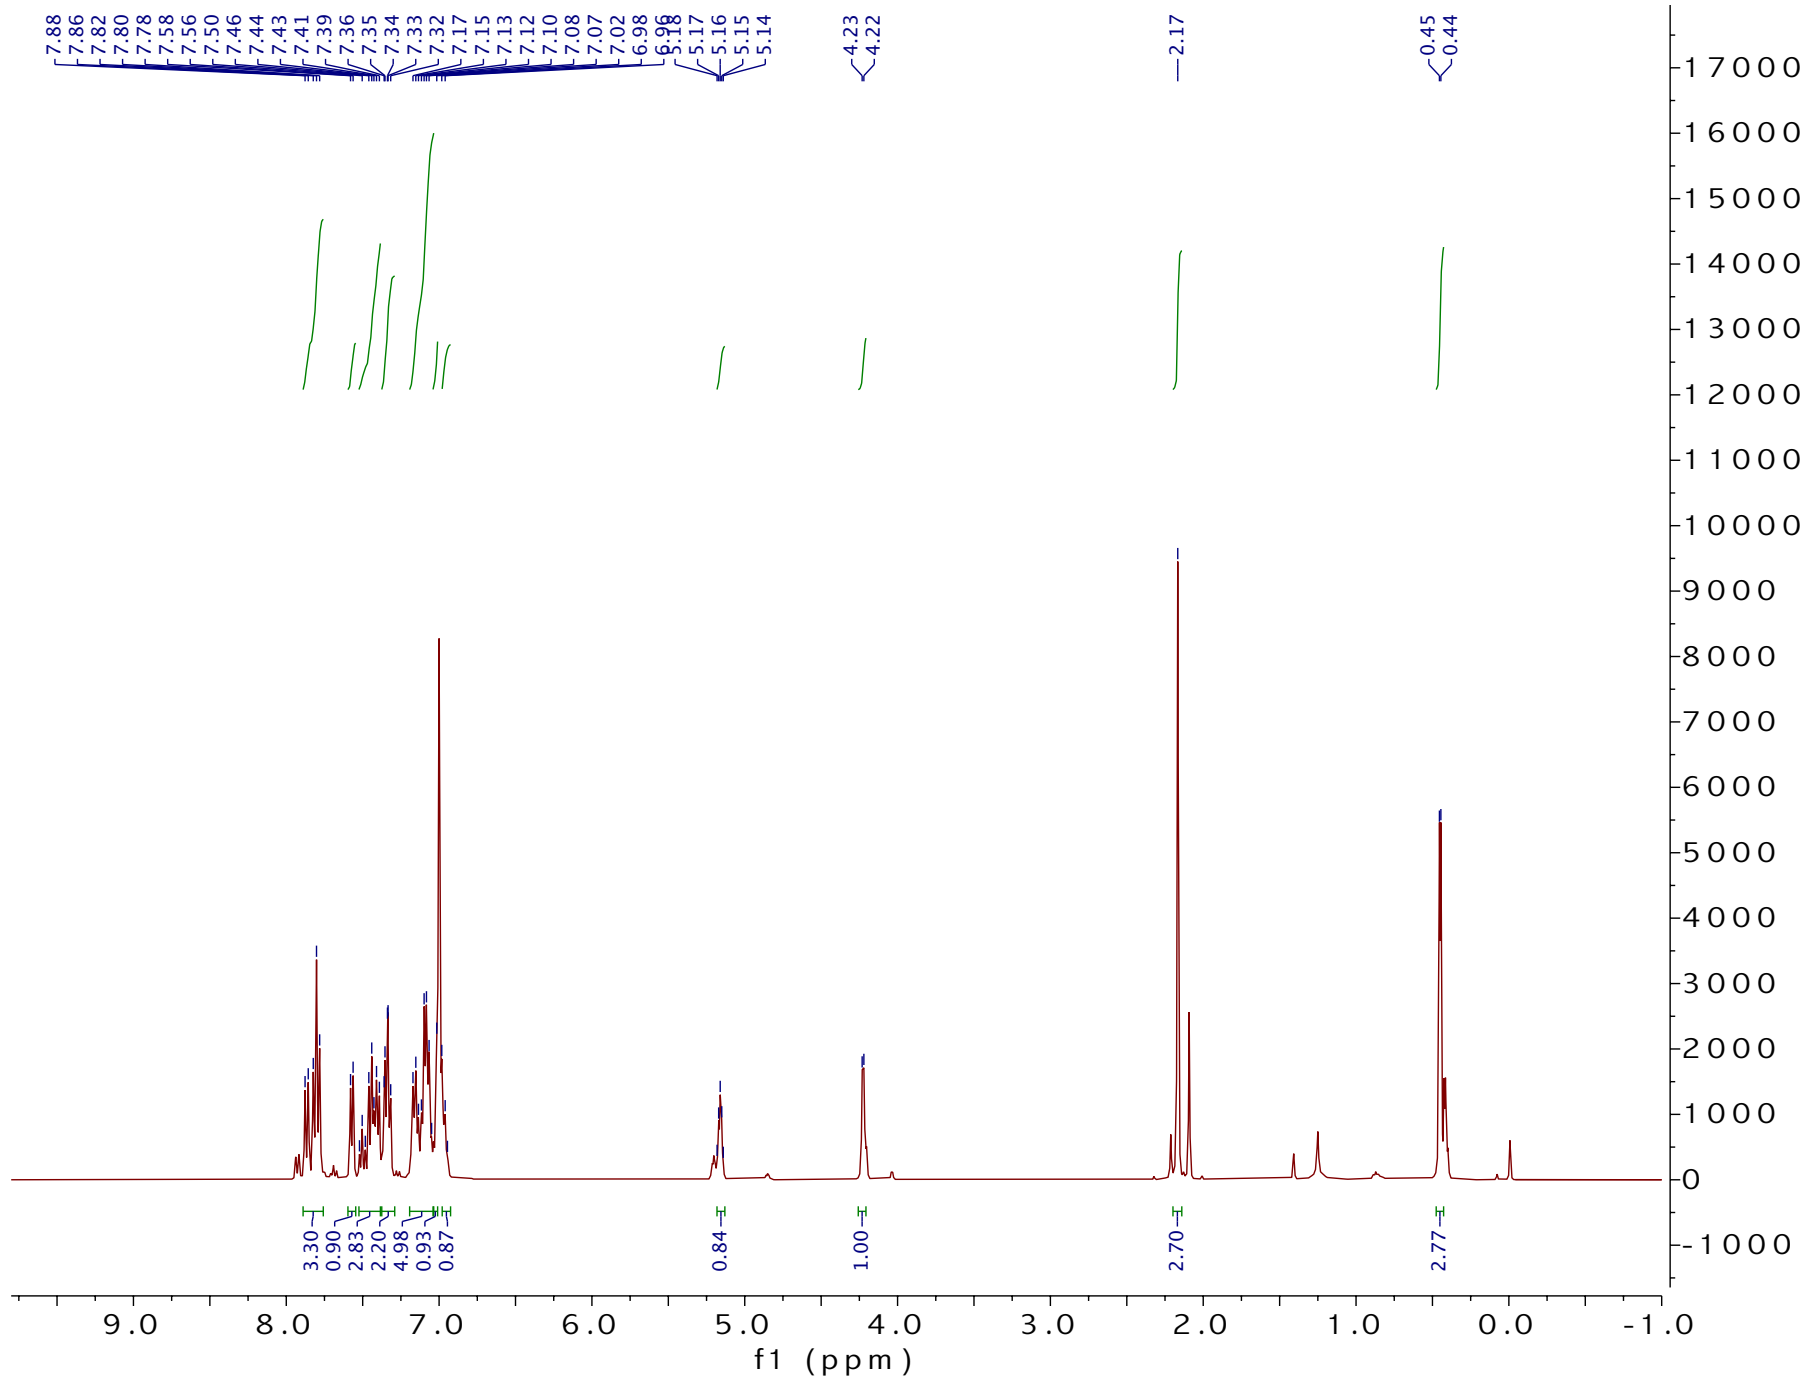

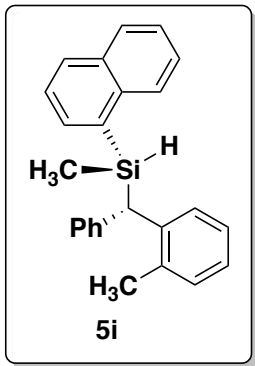

$^{13}\text{C}$ , 100 MHz,  $\text{CDCl}_3$

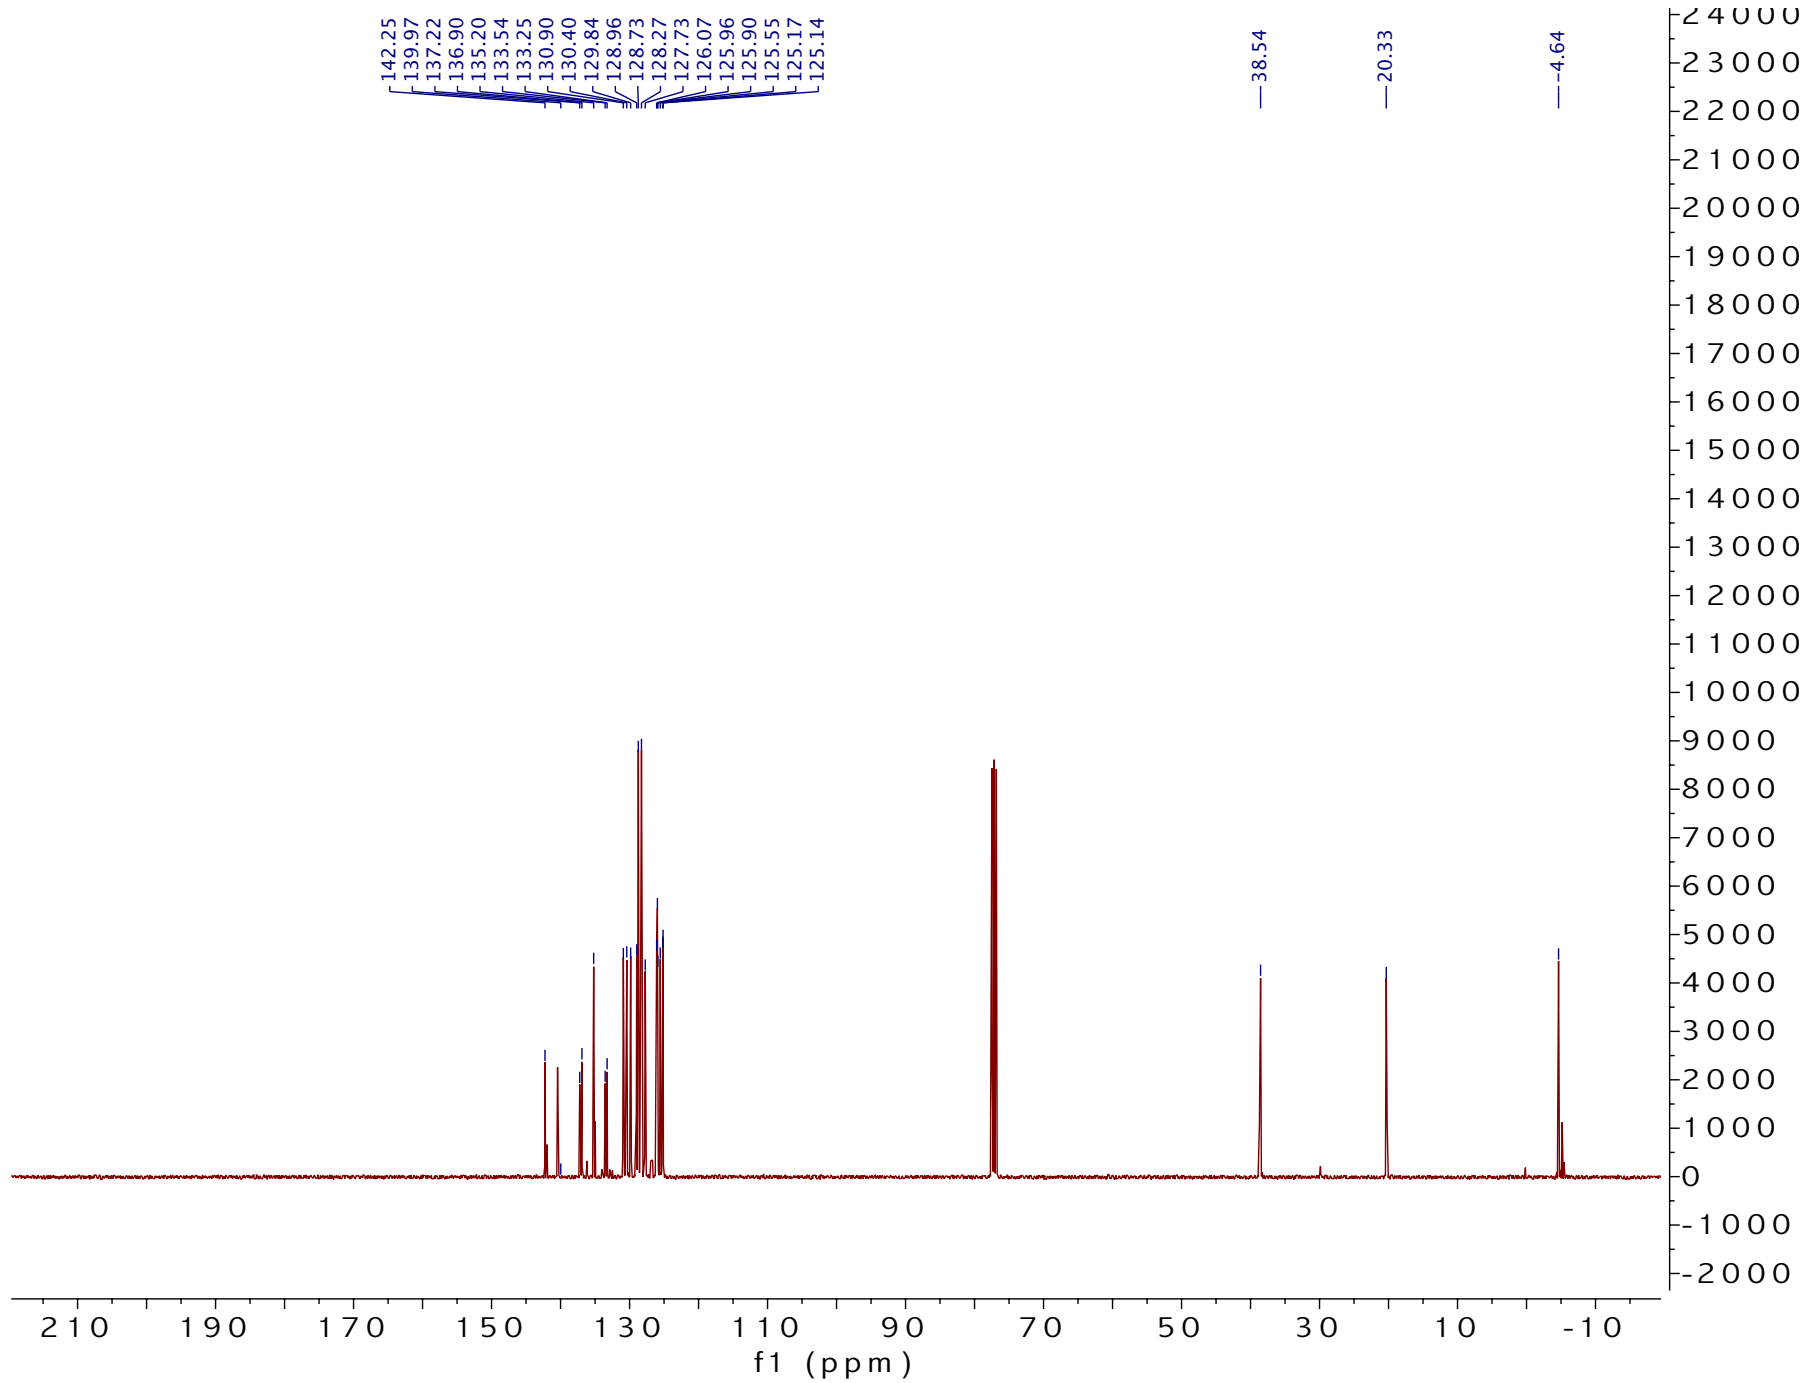

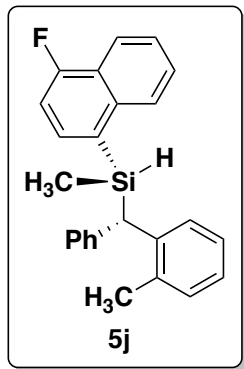

$^1\text{H}$ , 600 MHz,  $\text{CDCl}_3$

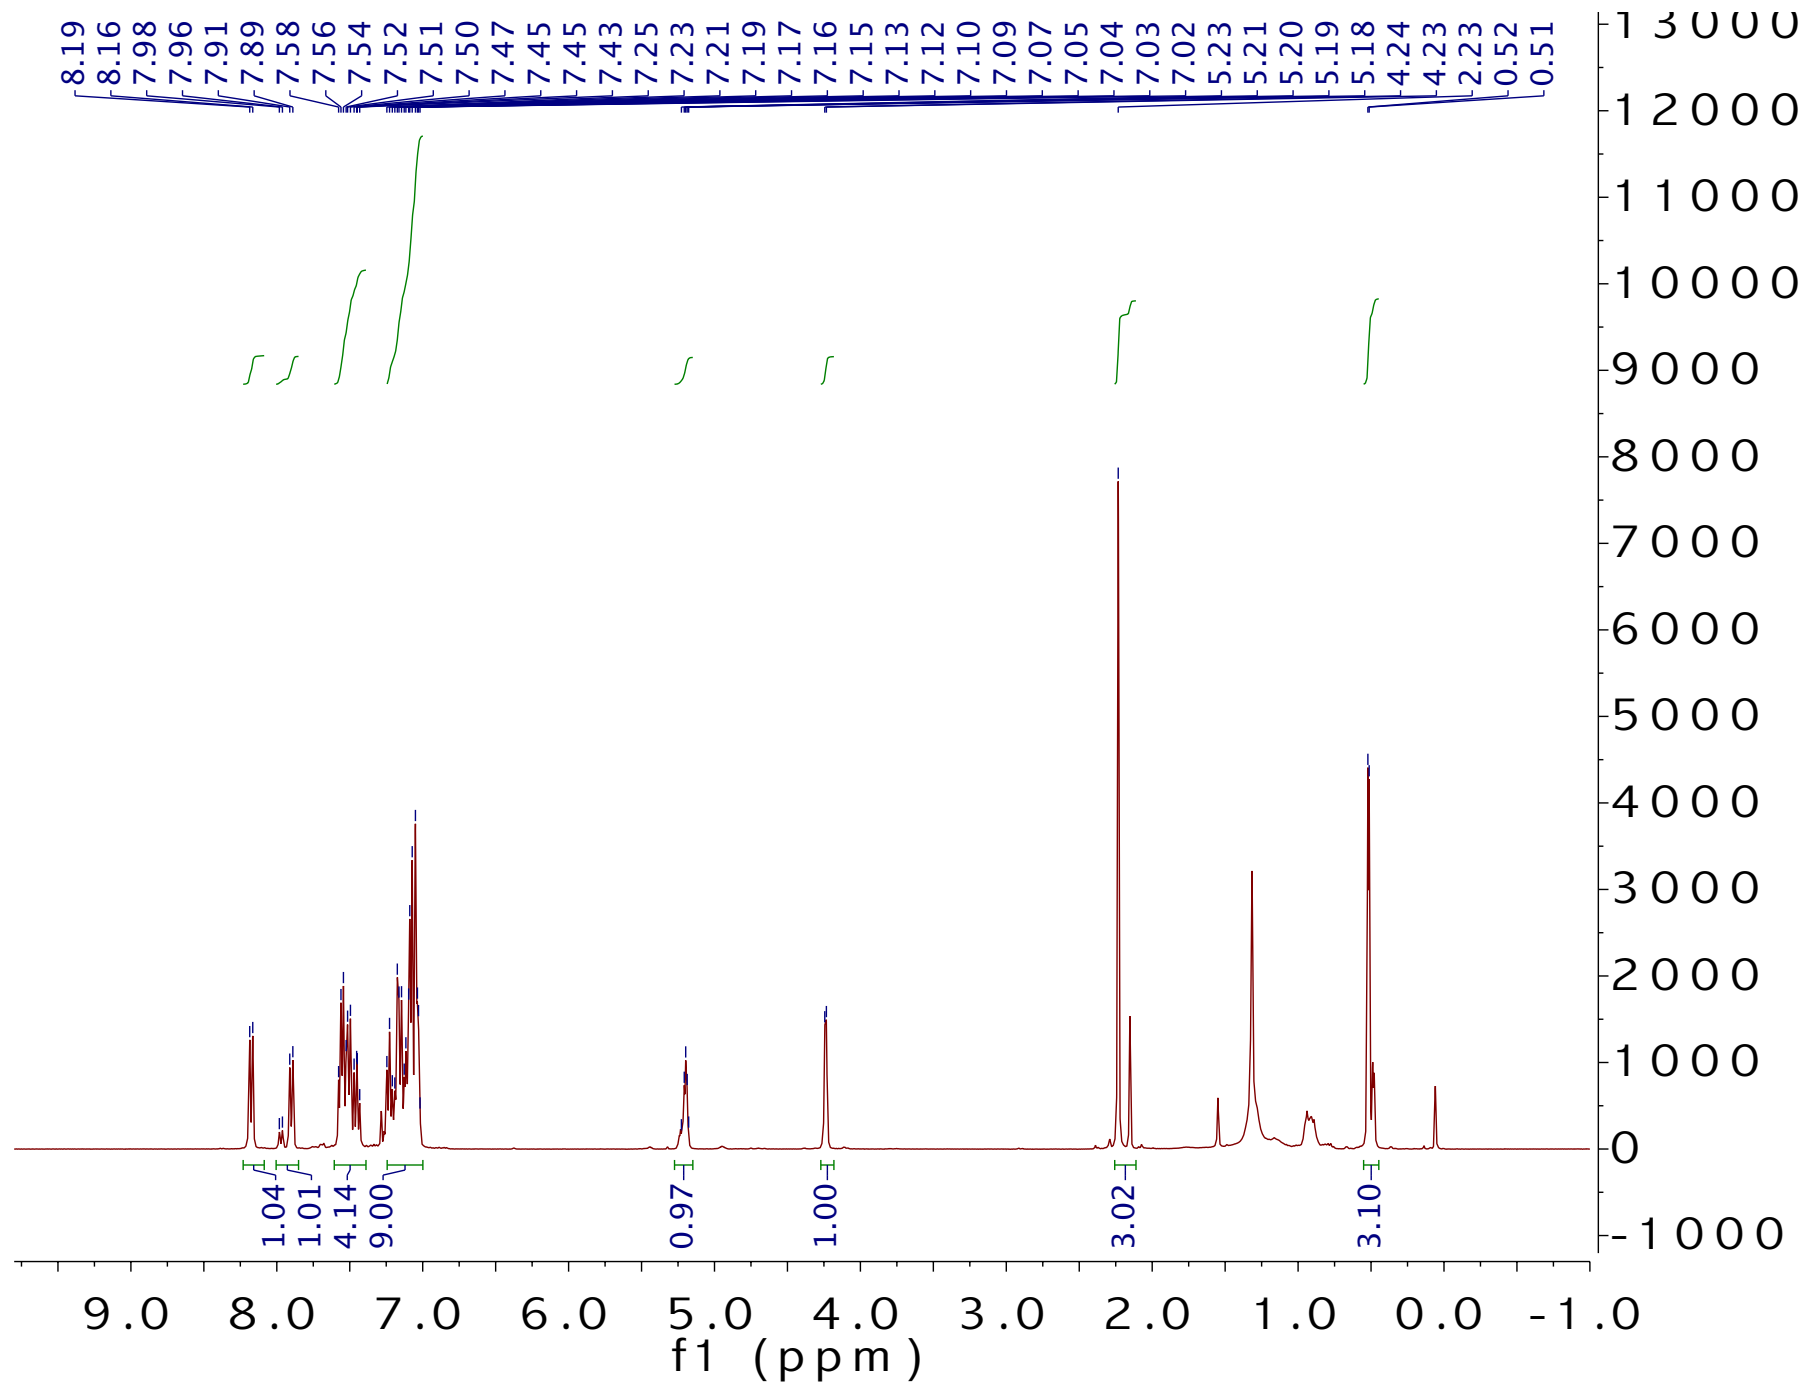

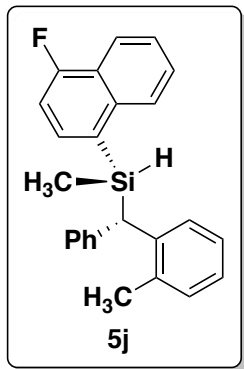

$^{13}\text{C}$ , 100 MHz,  $\text{CDCl}_3$

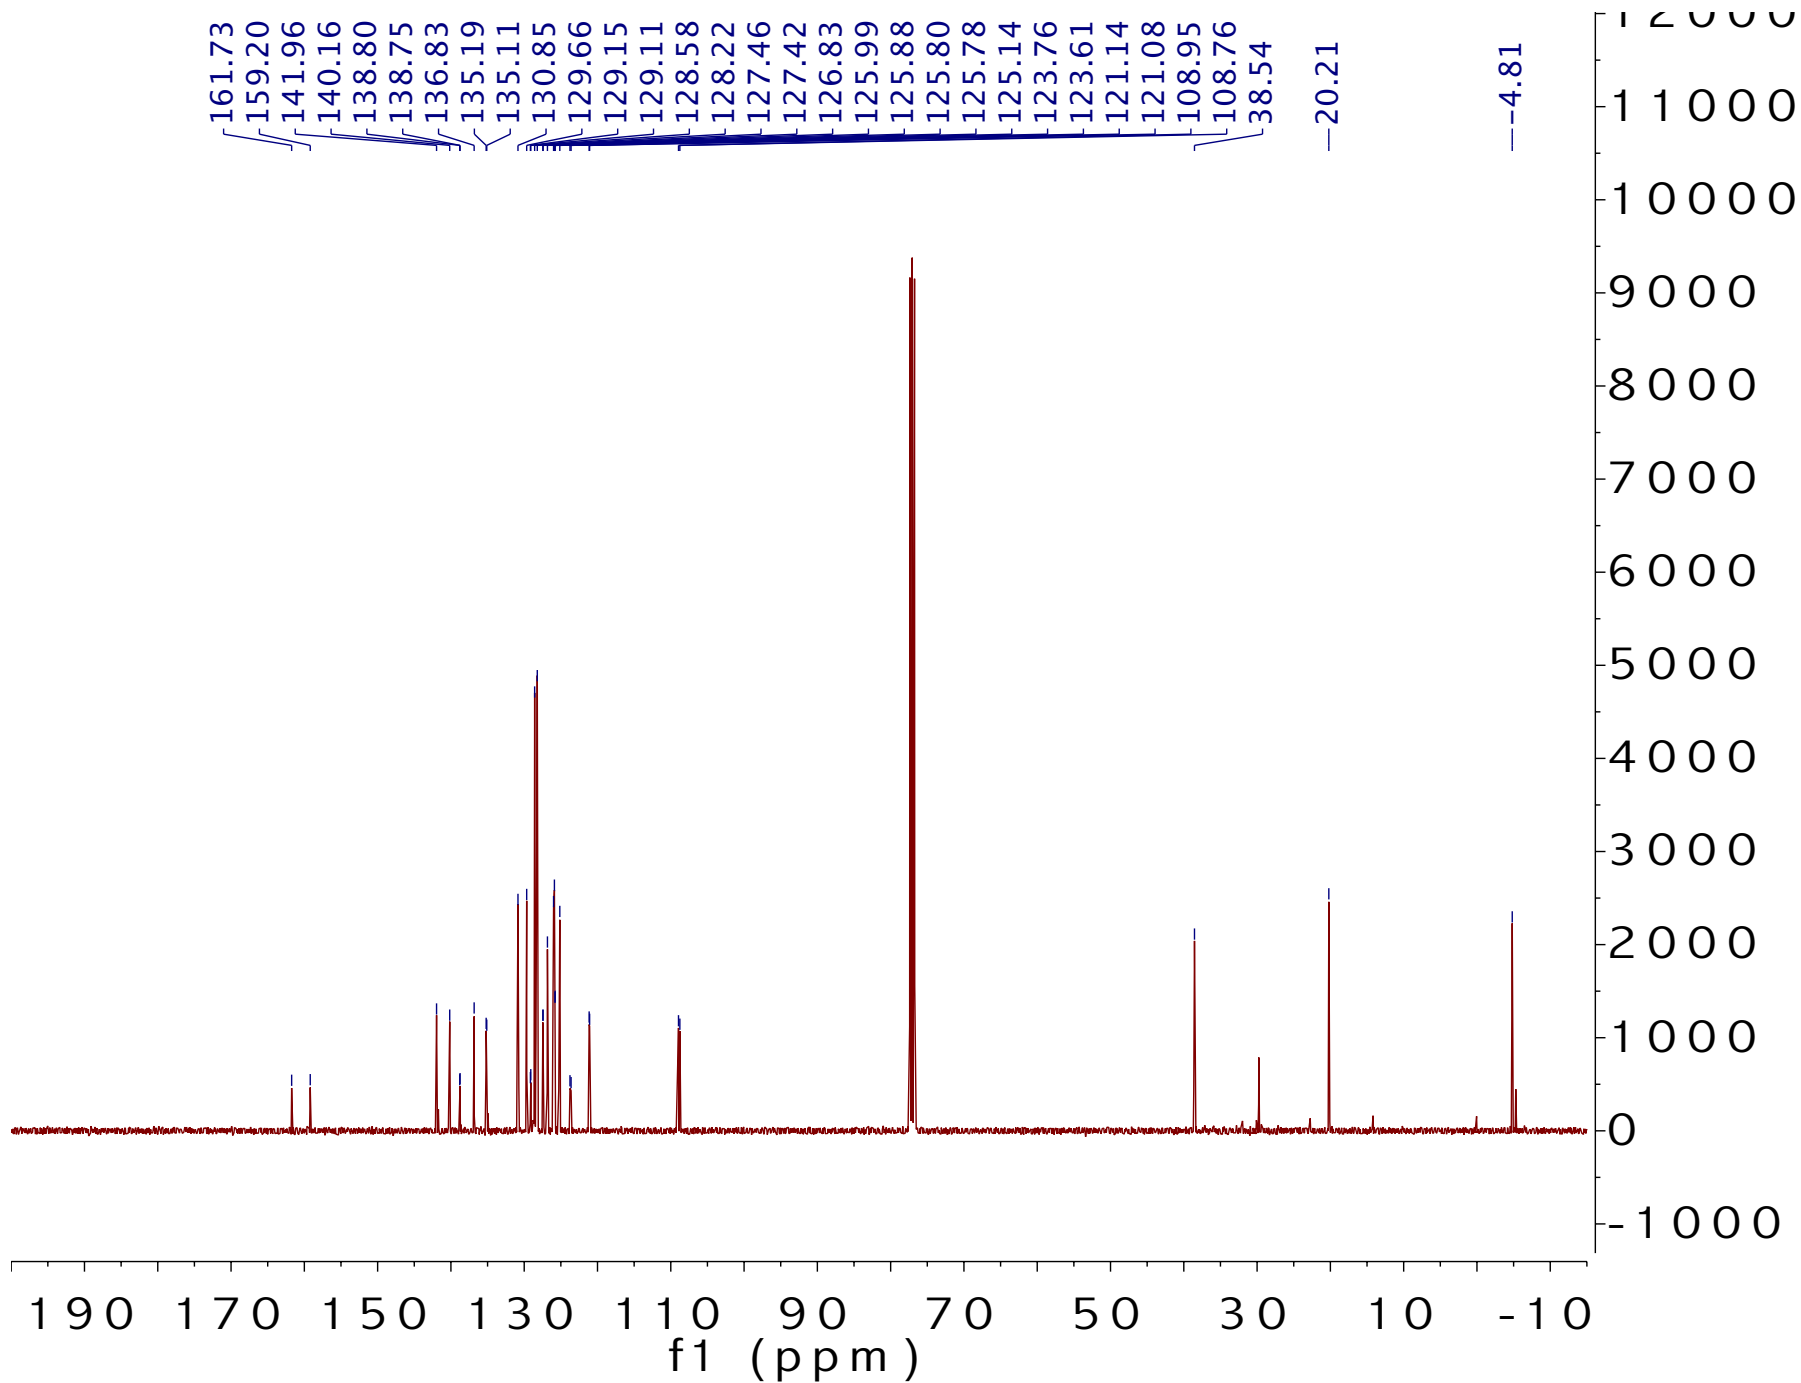



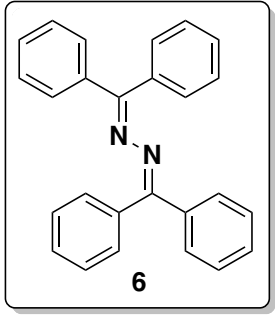

$^1\text{H}$ , 600 MHz,  $\text{CDCl}_3$

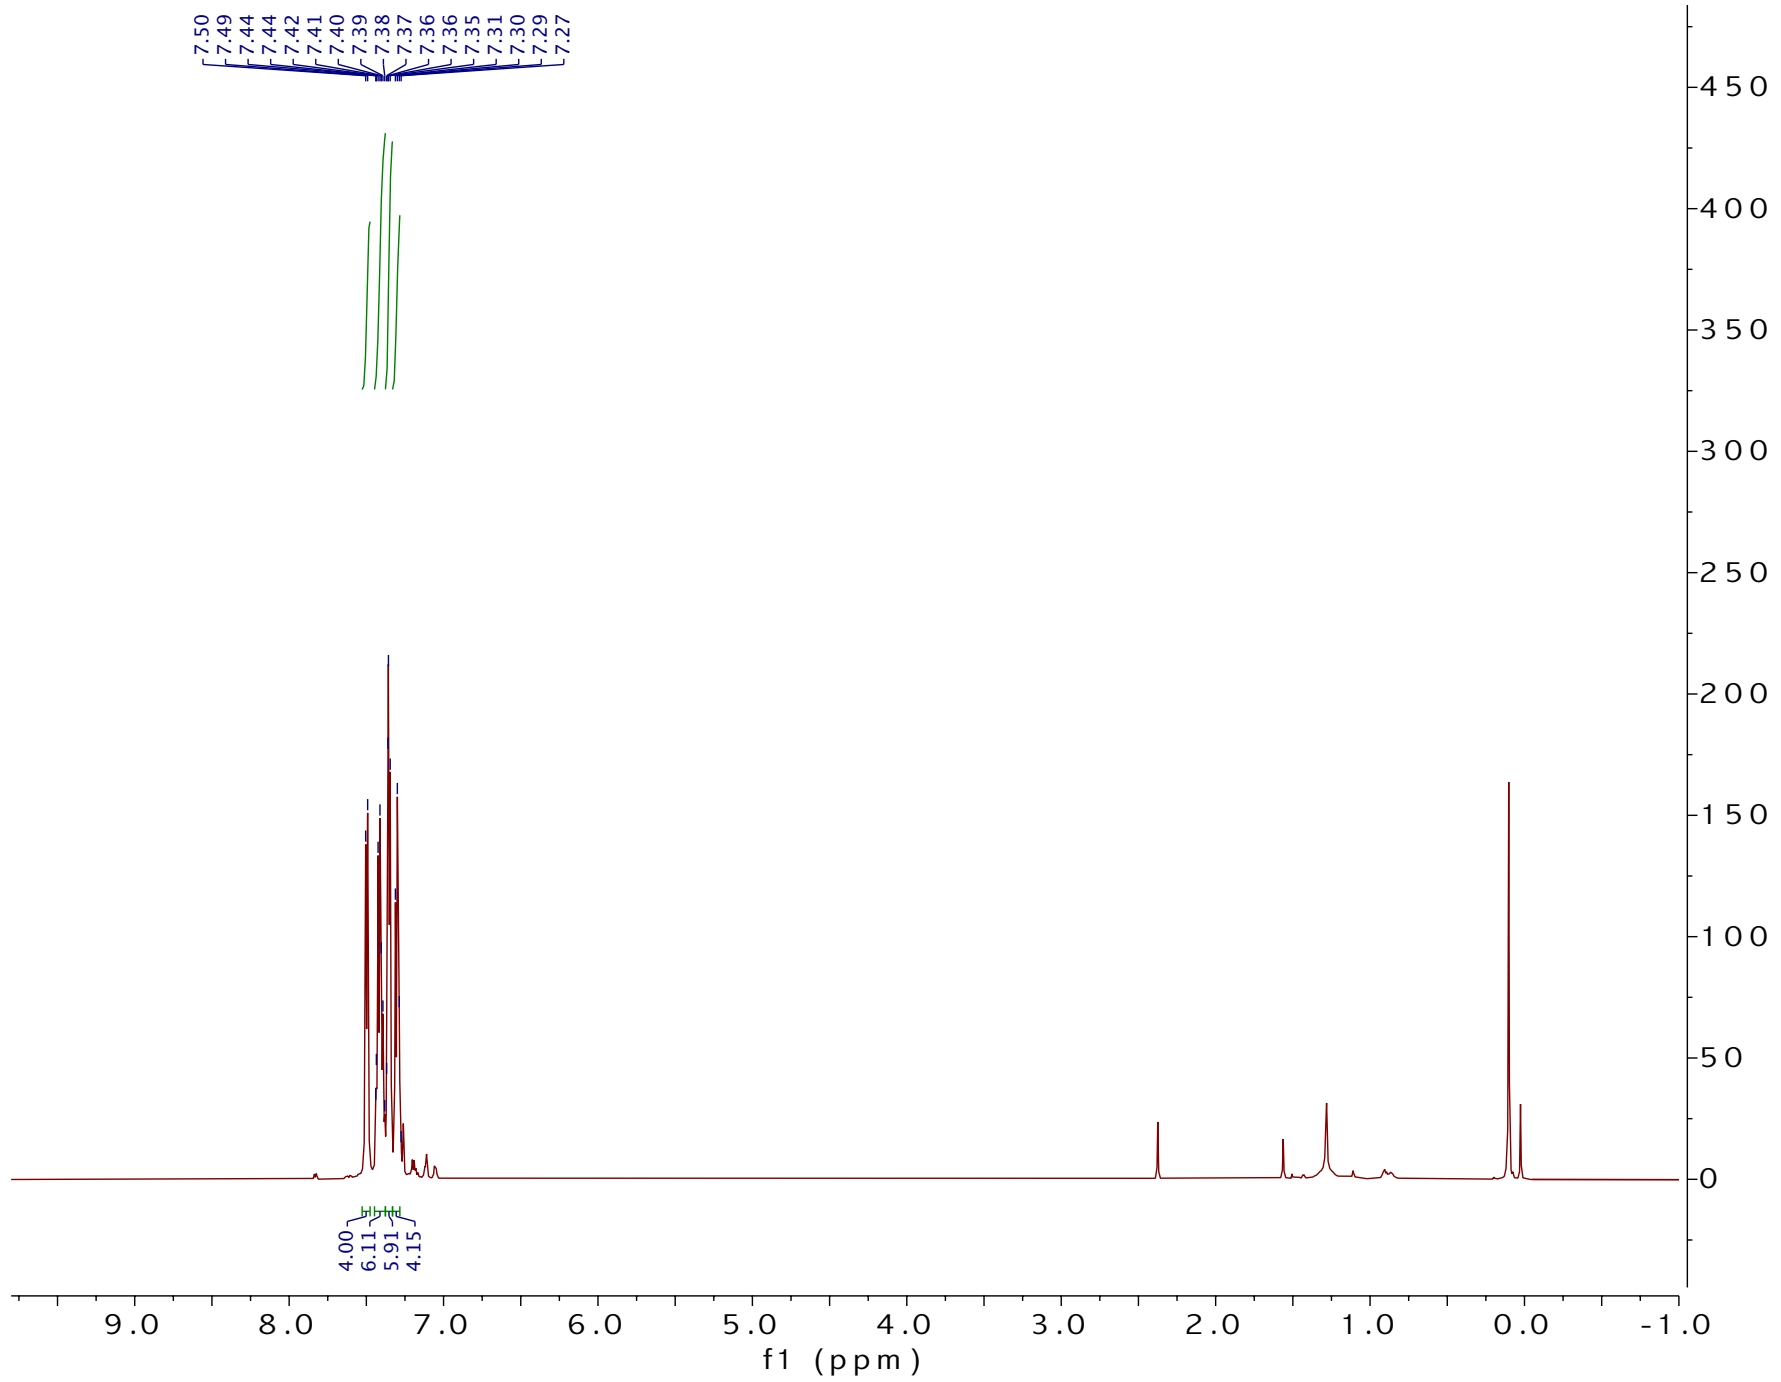

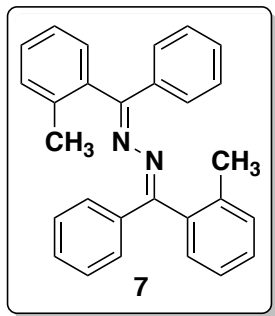

<sup>1</sup>H, 600 MHz, CDCl<sub>3</sub>

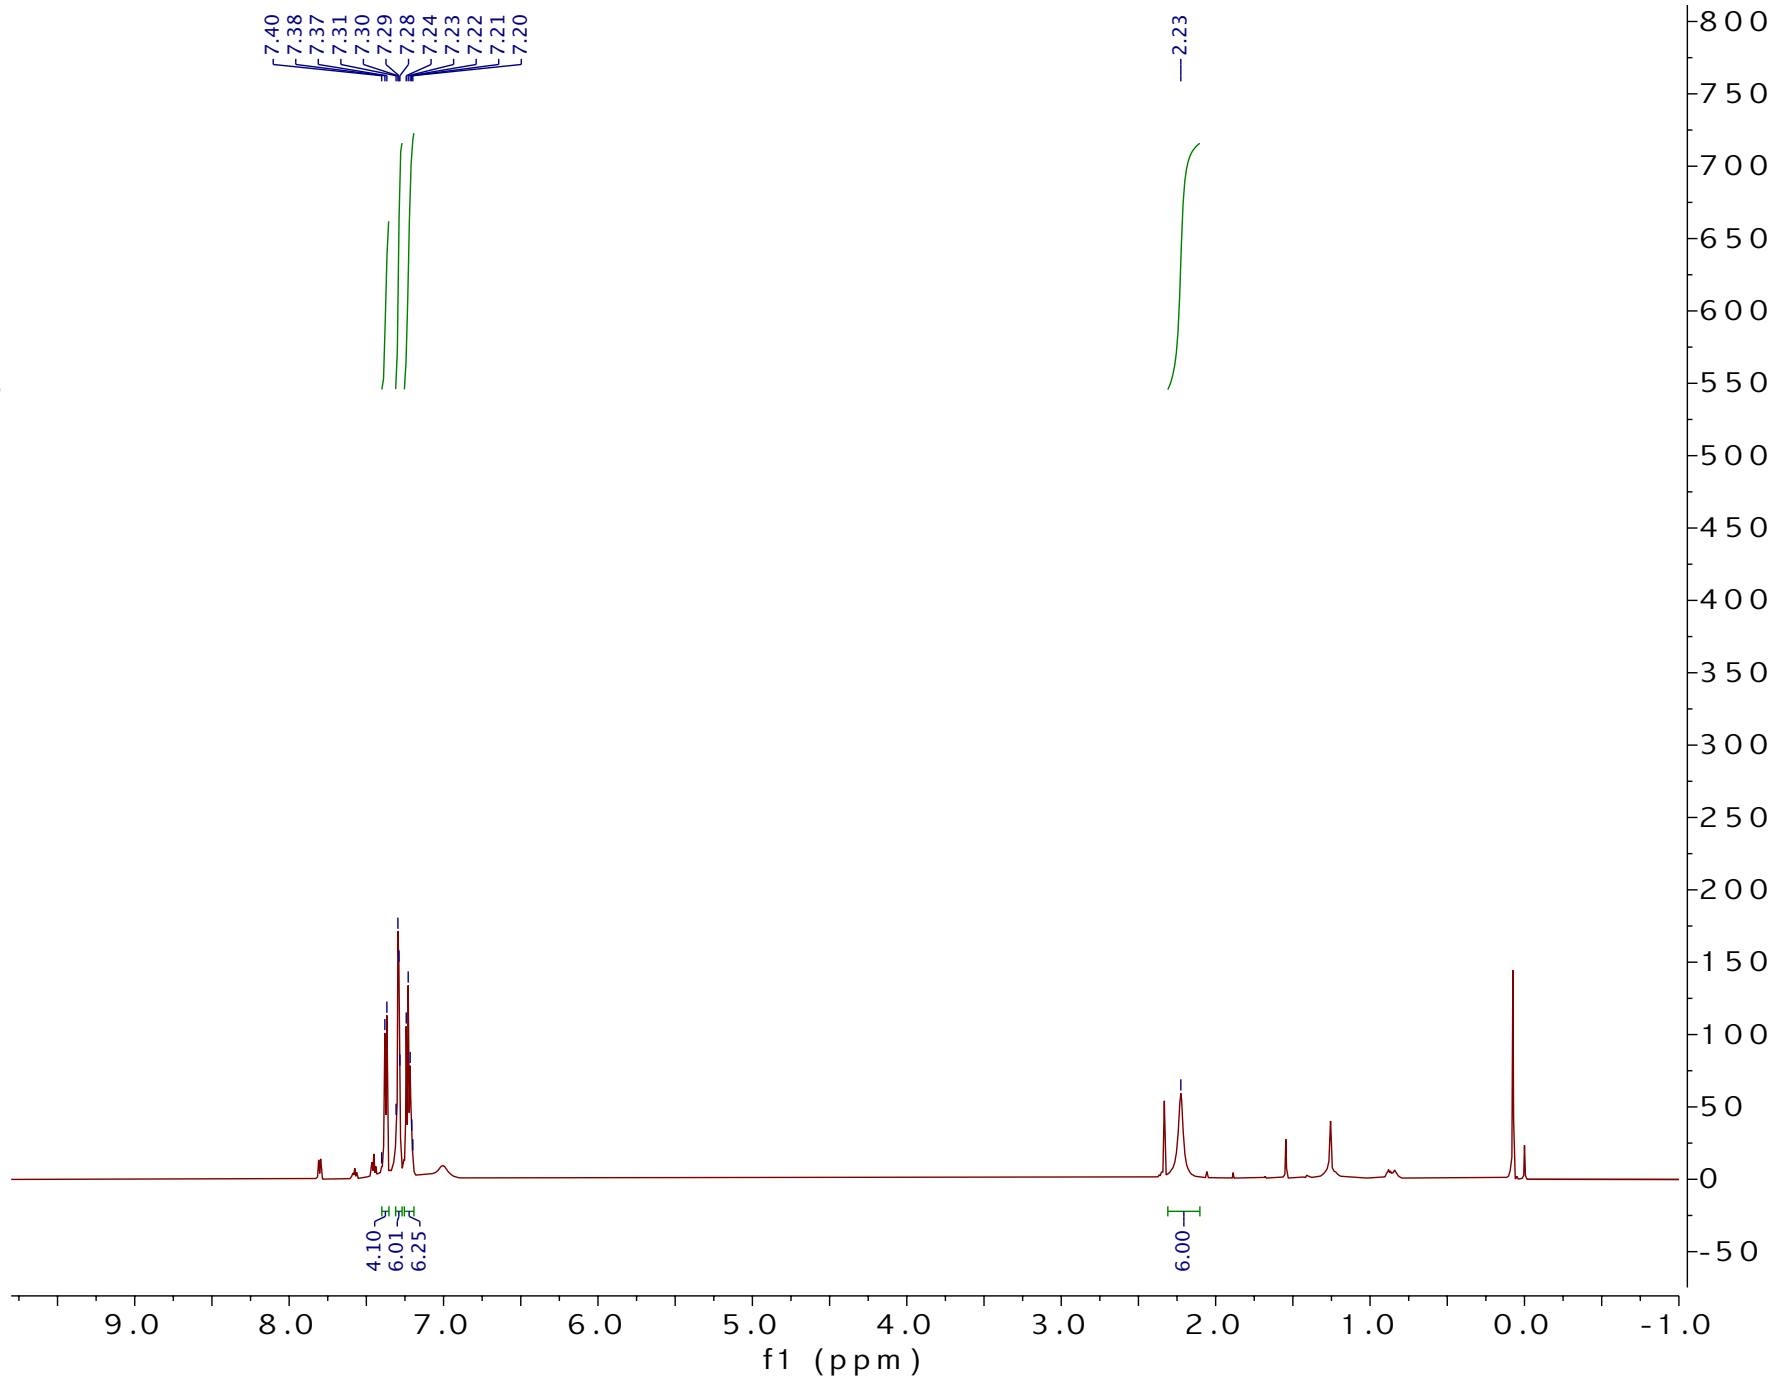

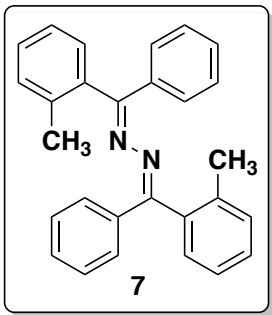

$^{13}\text{C}$ , 151 MHz,  $\text{CDCl}_3$

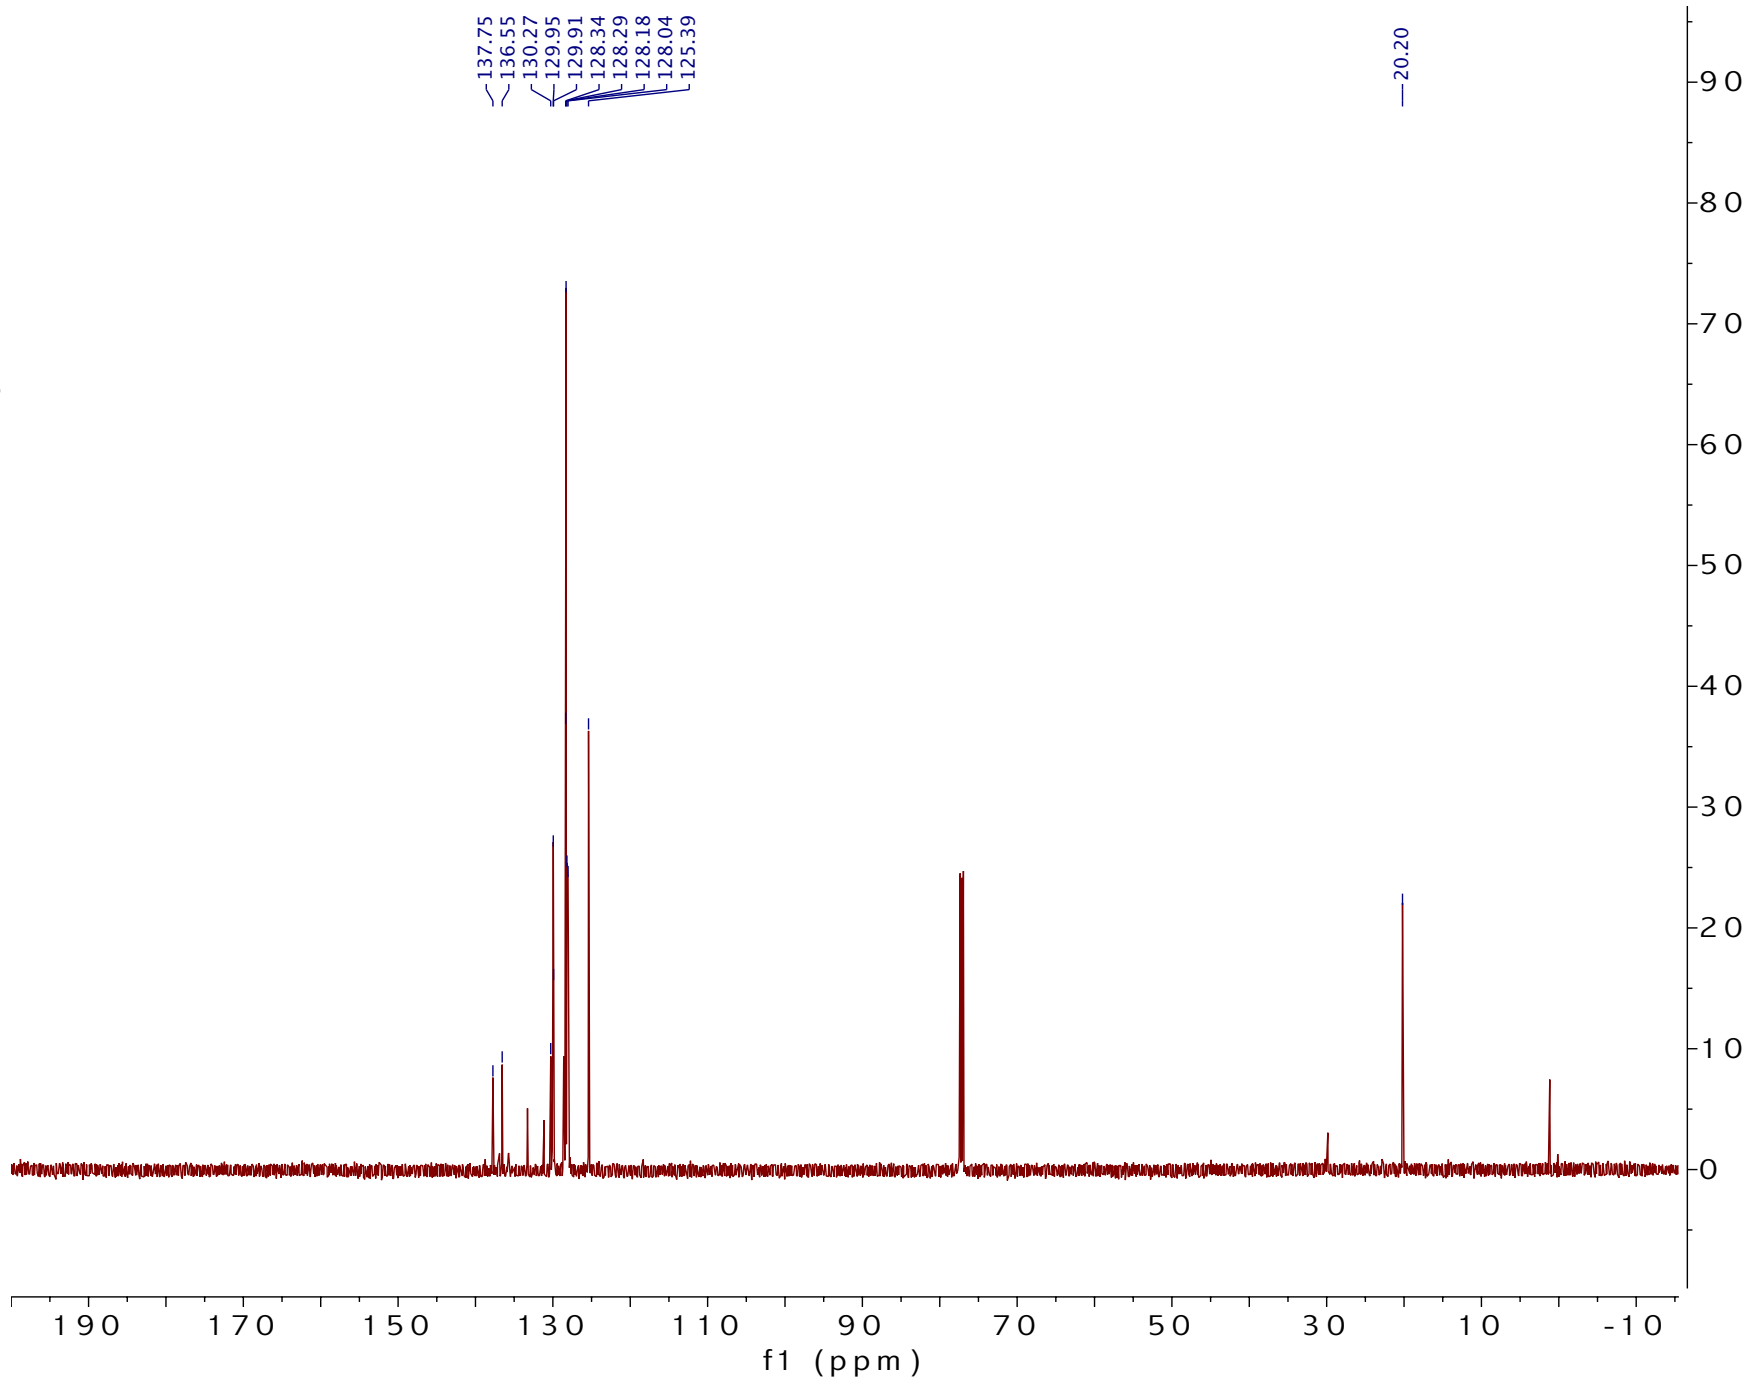

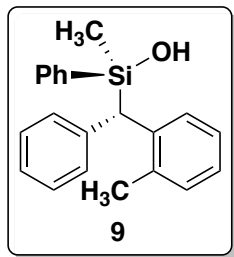

$^1\text{H}$ , 600 MHz,  $\text{C}_6\text{D}_6$

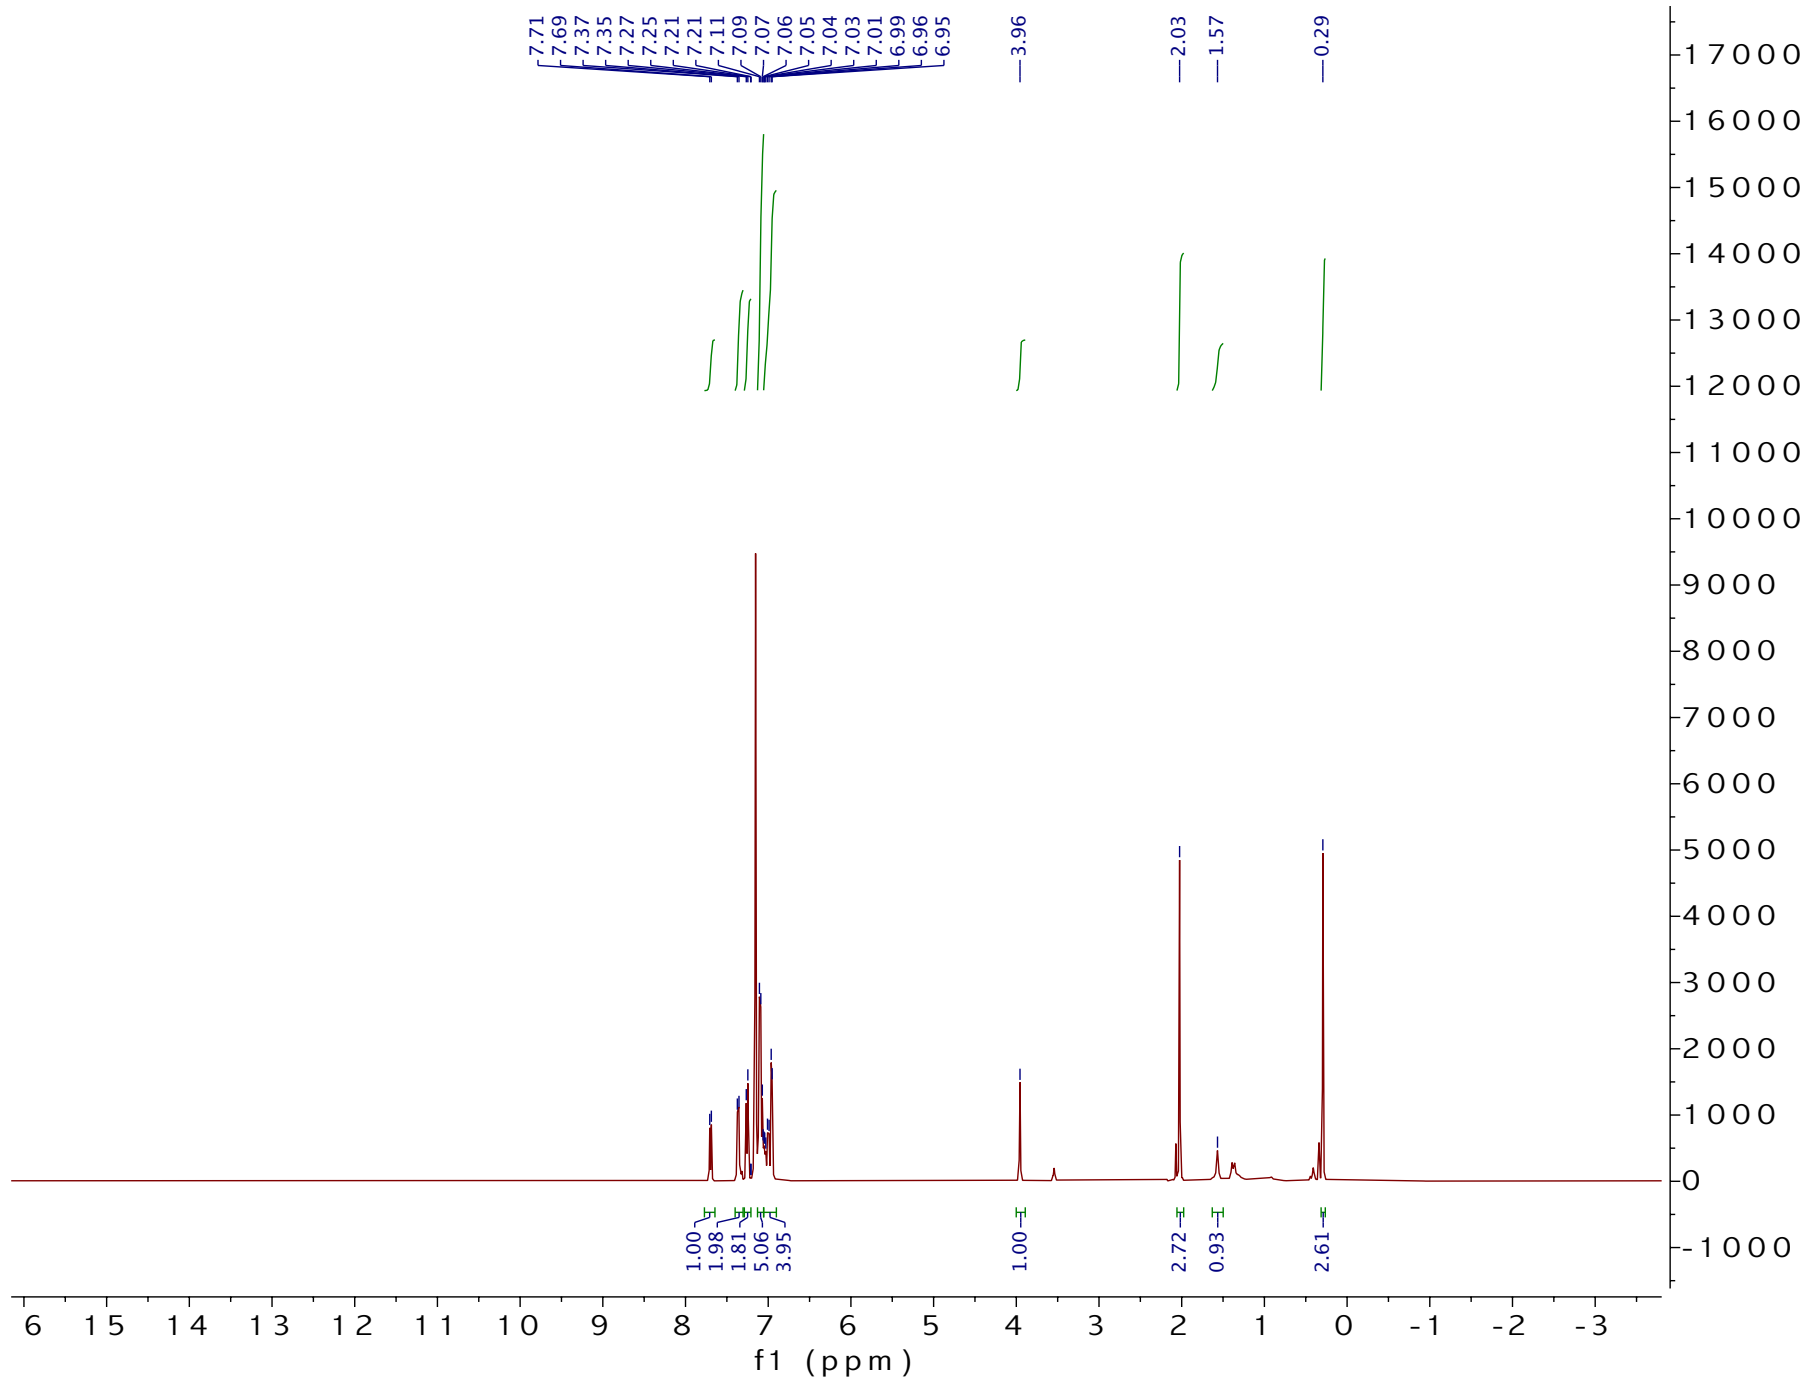

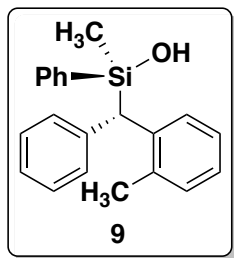

$^{13}\text{C}$ , 151 MHz,  $\text{CDCl}_3$

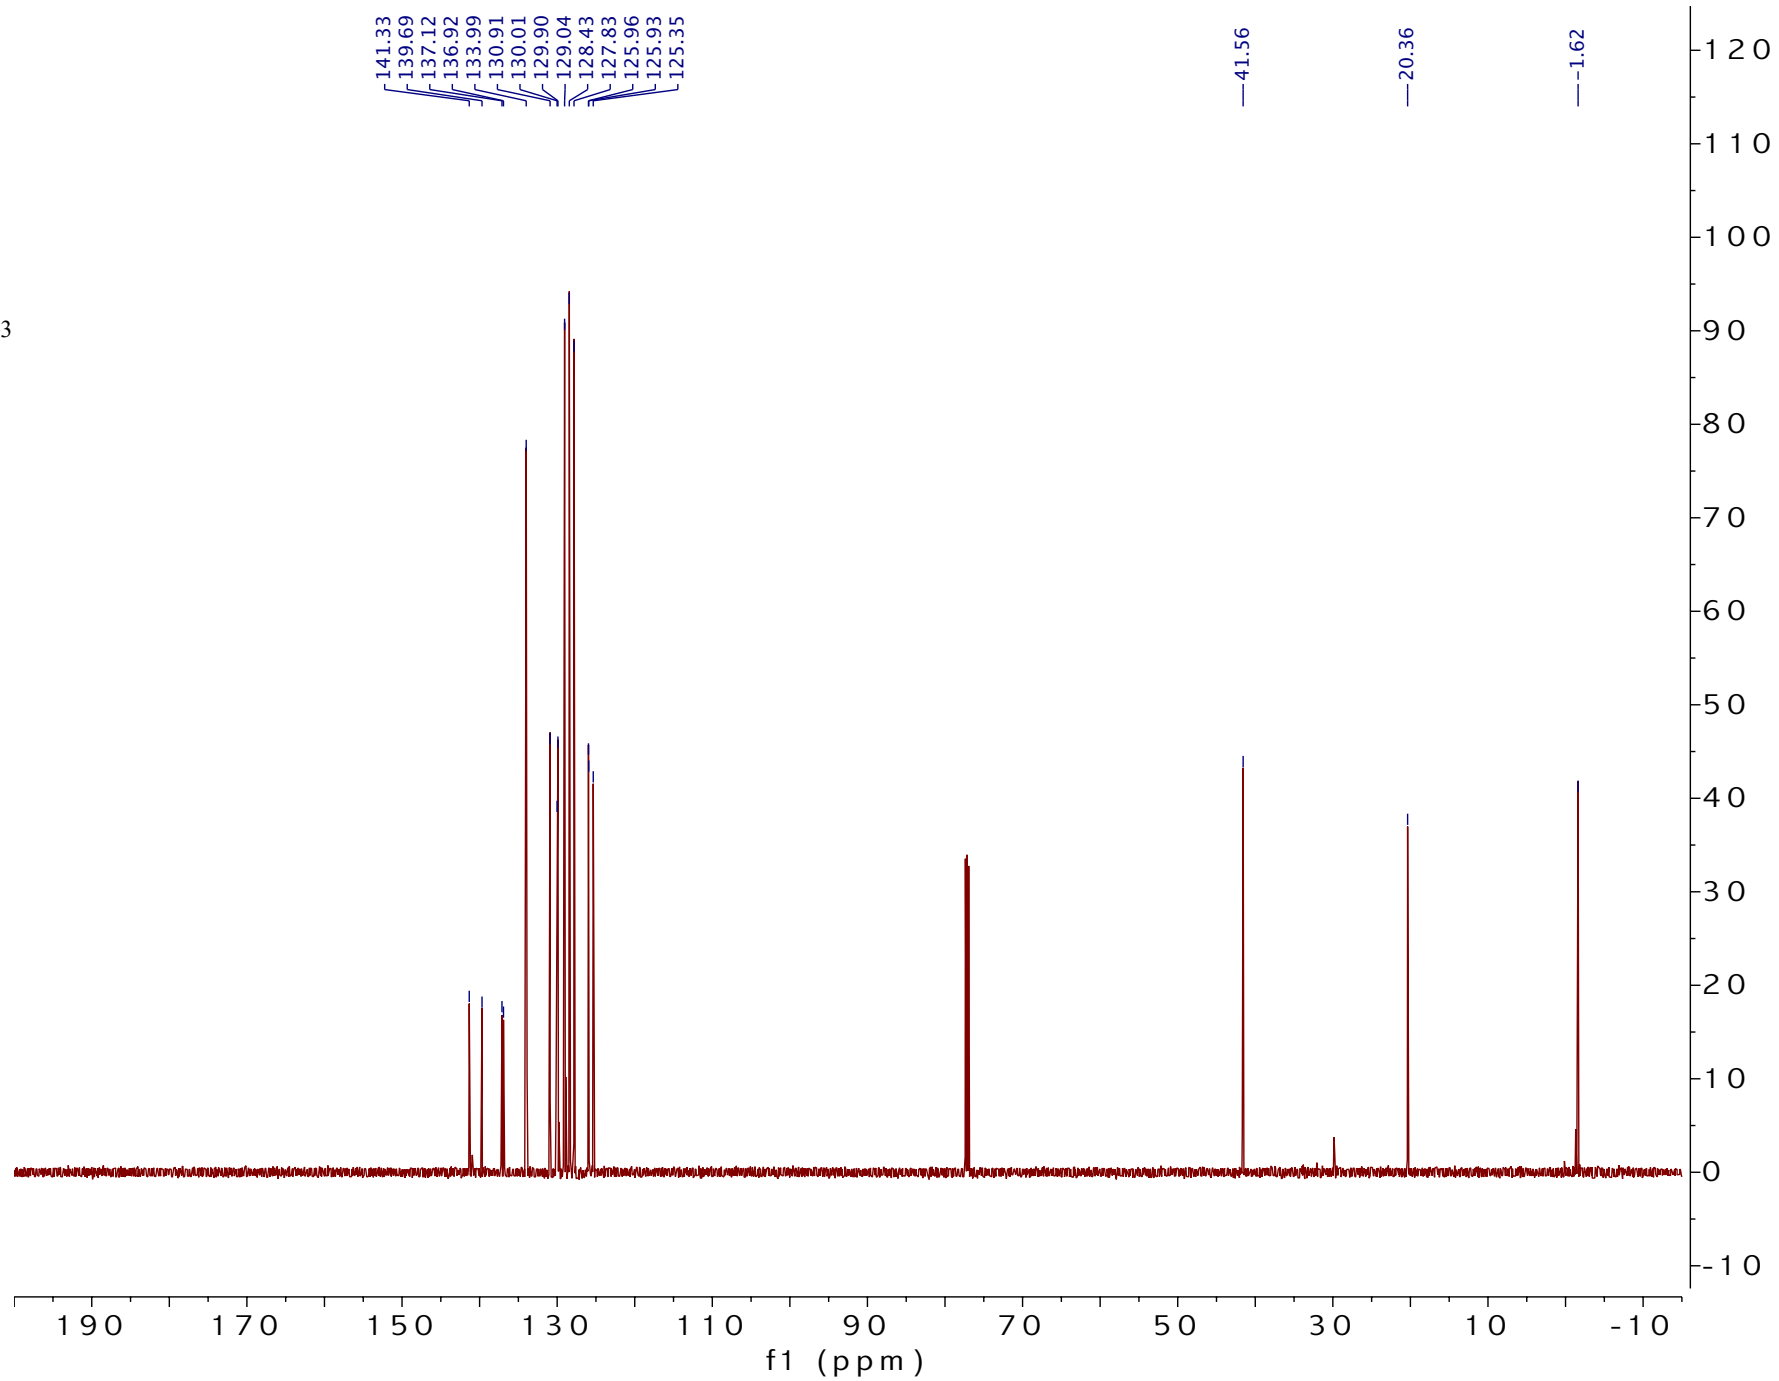

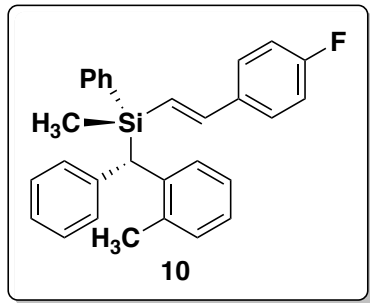

<sup>1</sup>H, 600 MHz, CDCl<sub>3</sub>

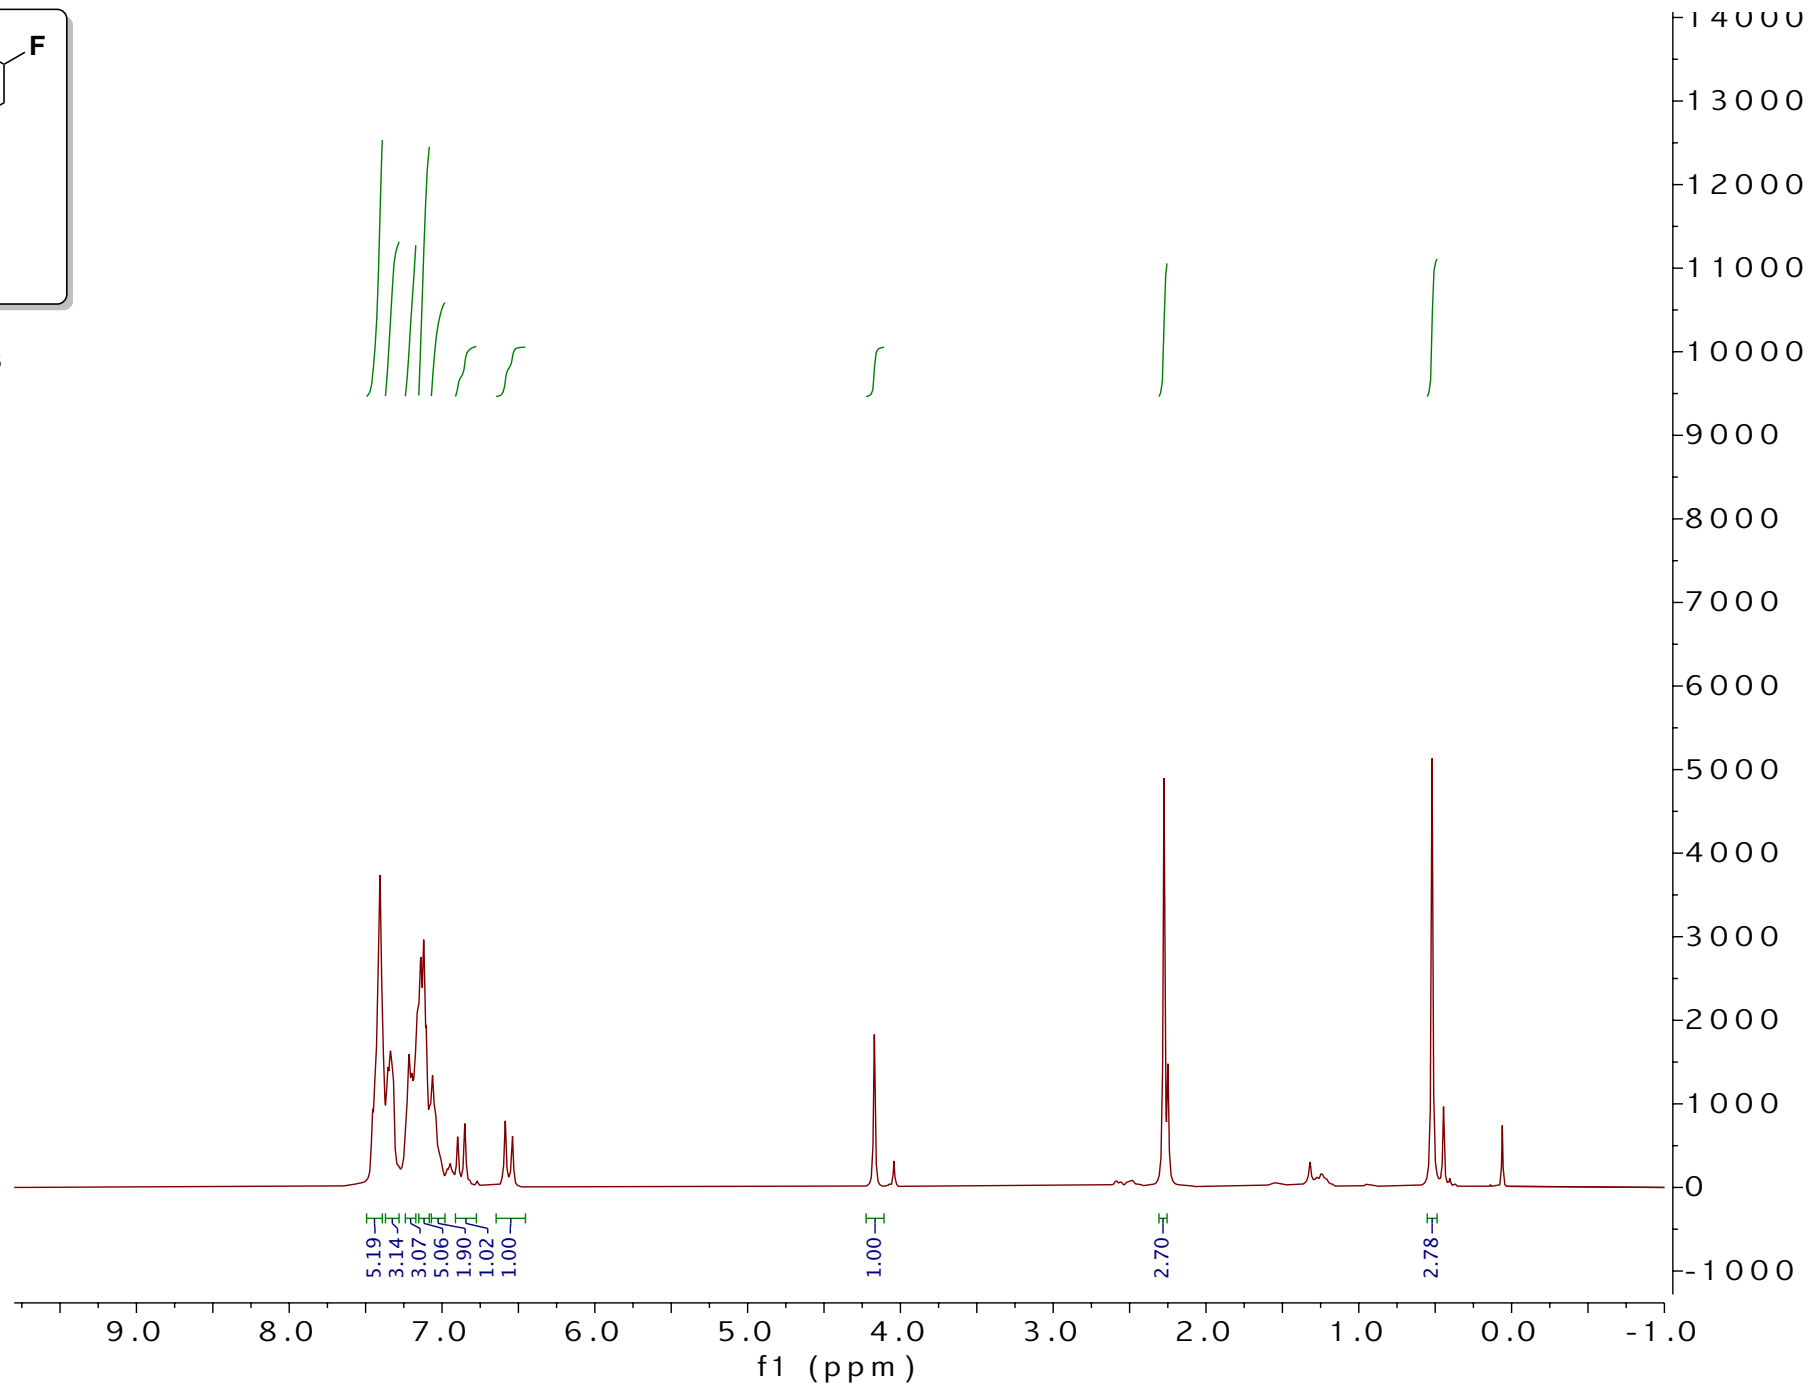

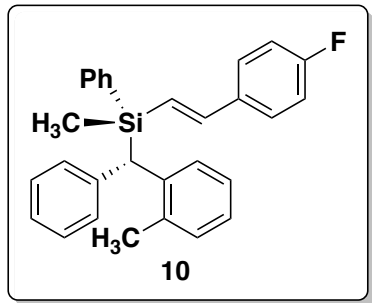

$^{13}\text{C}$ , 151 MHz,  $\text{CDCl}_3$

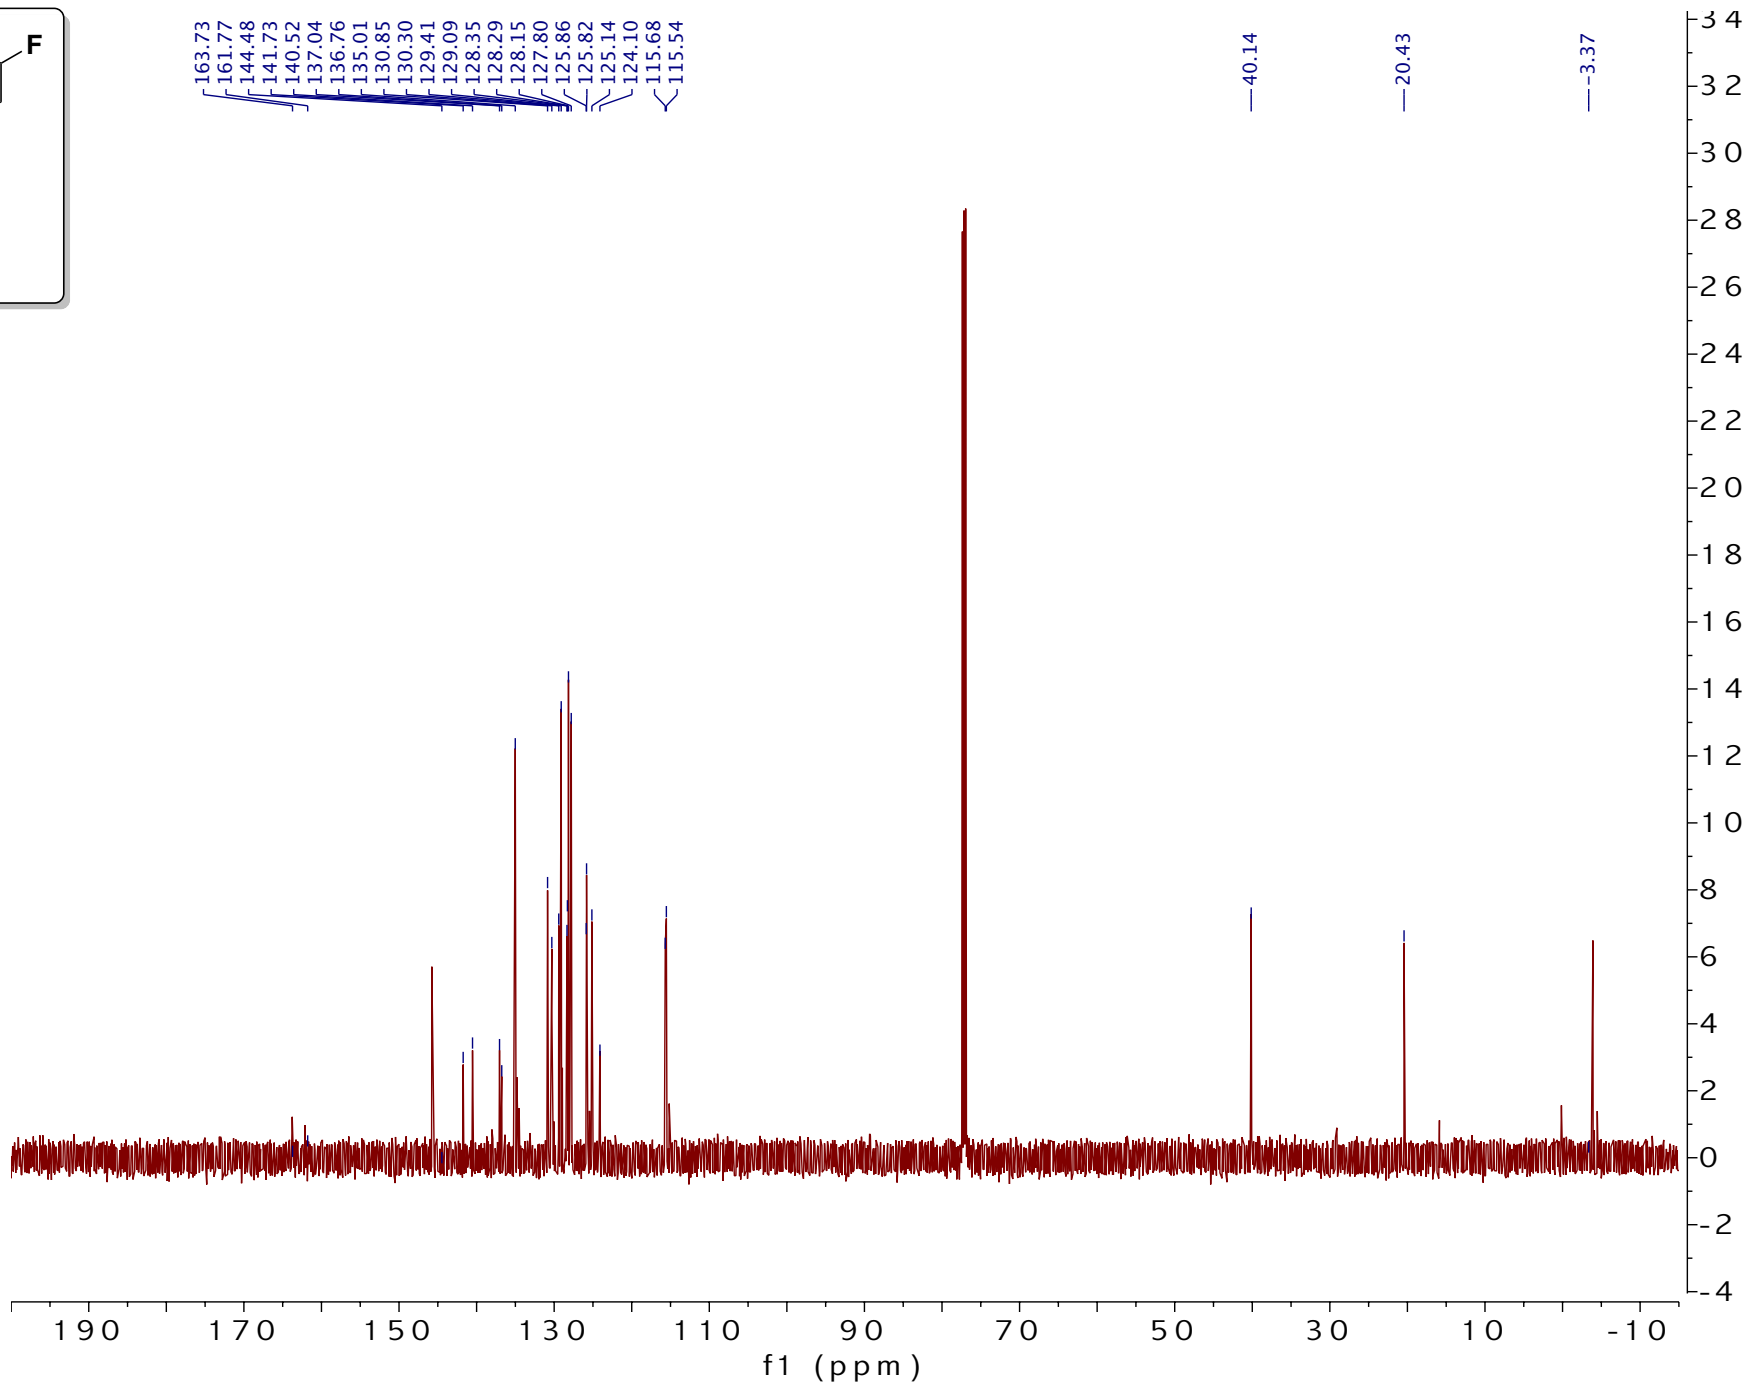

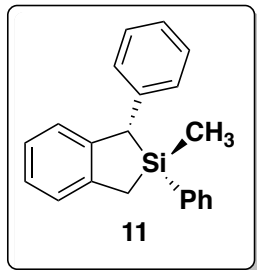

$^1\text{H}$ , 600 MHz,  $\text{CDCl}_3$

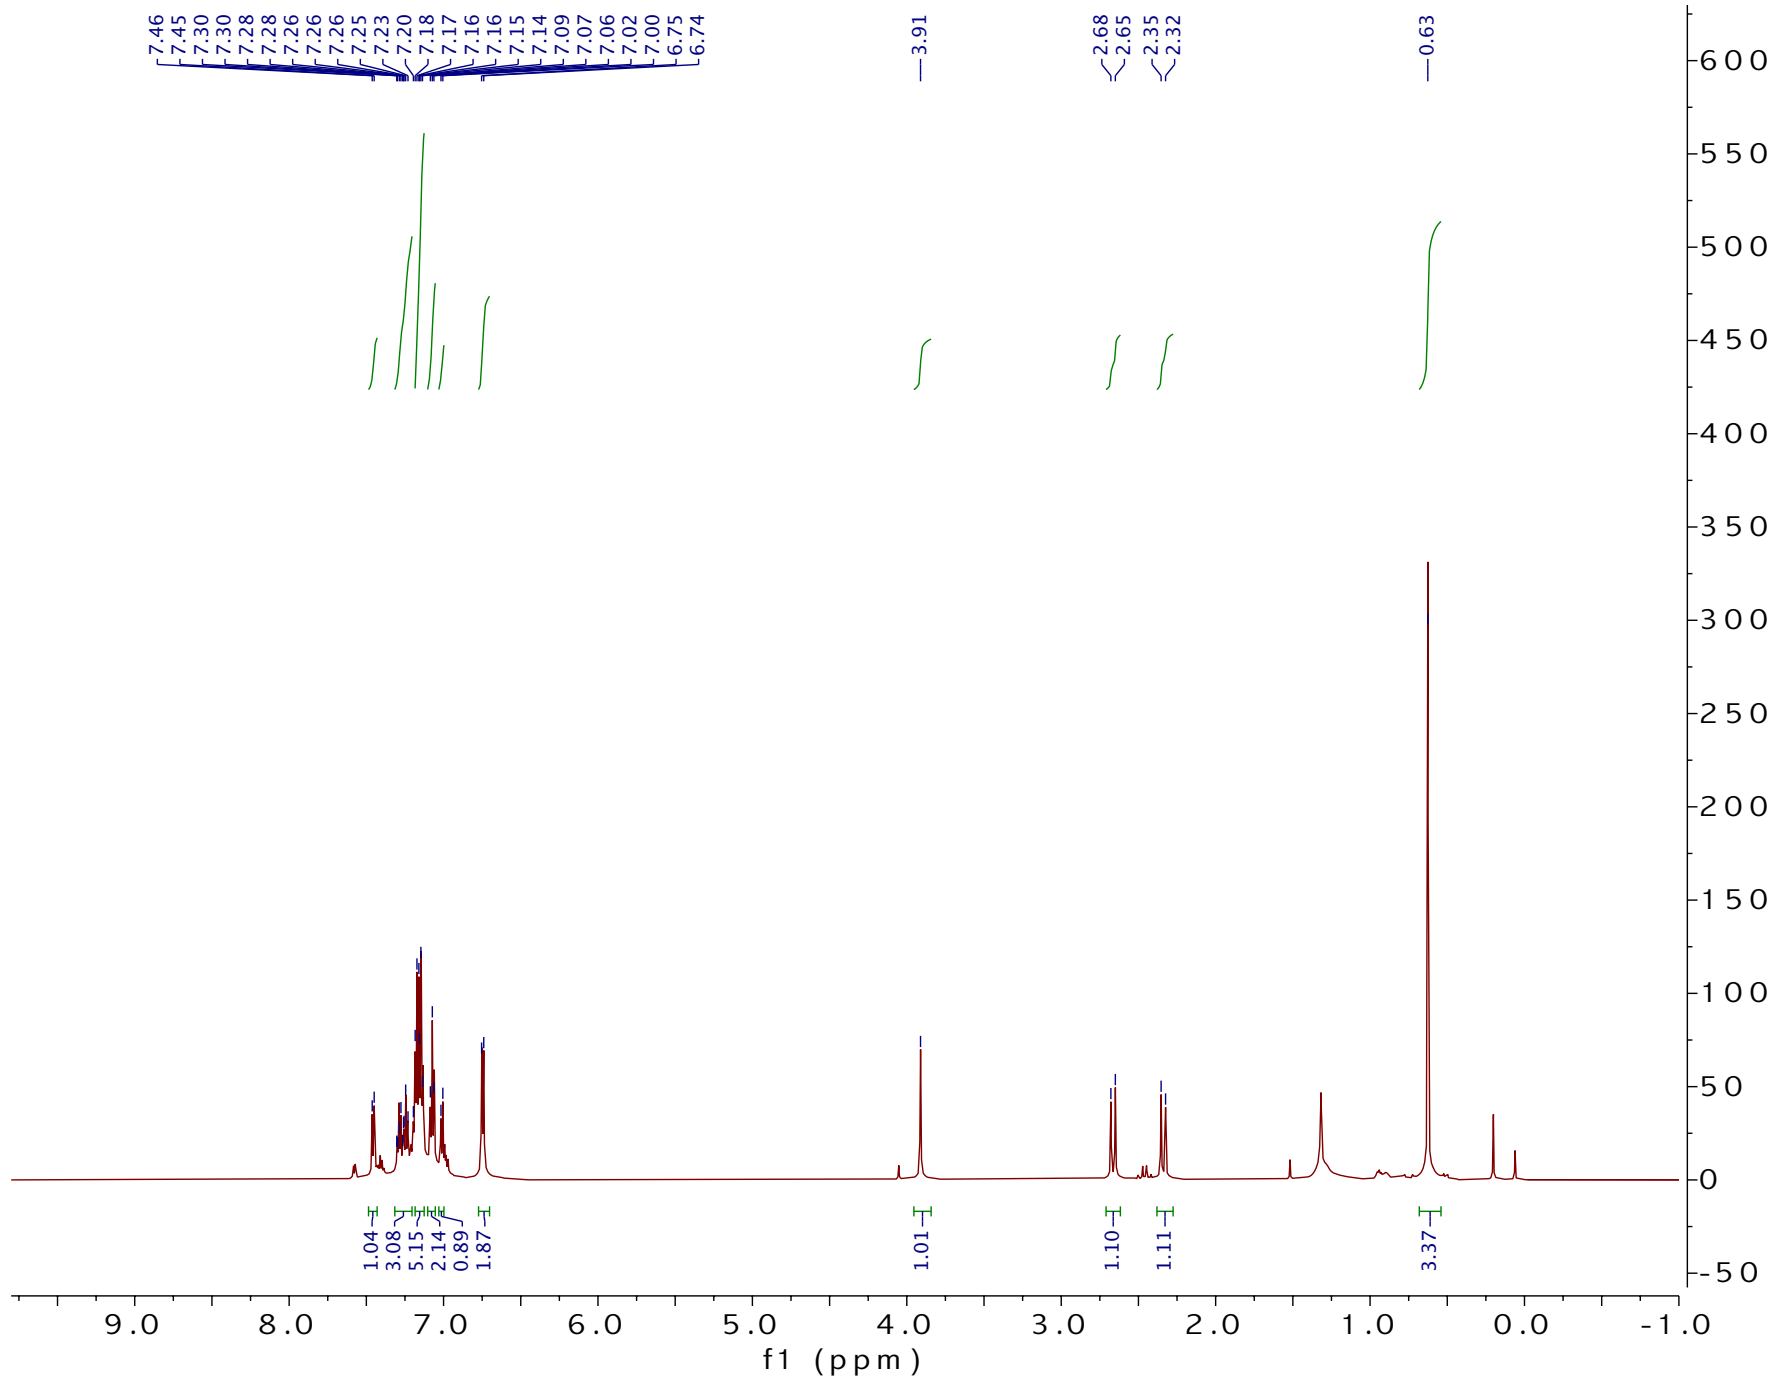



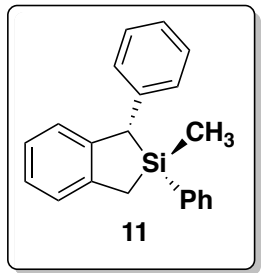

$^{13}\text{C}$ , 151 MHz,  $\text{CDCl}_3$

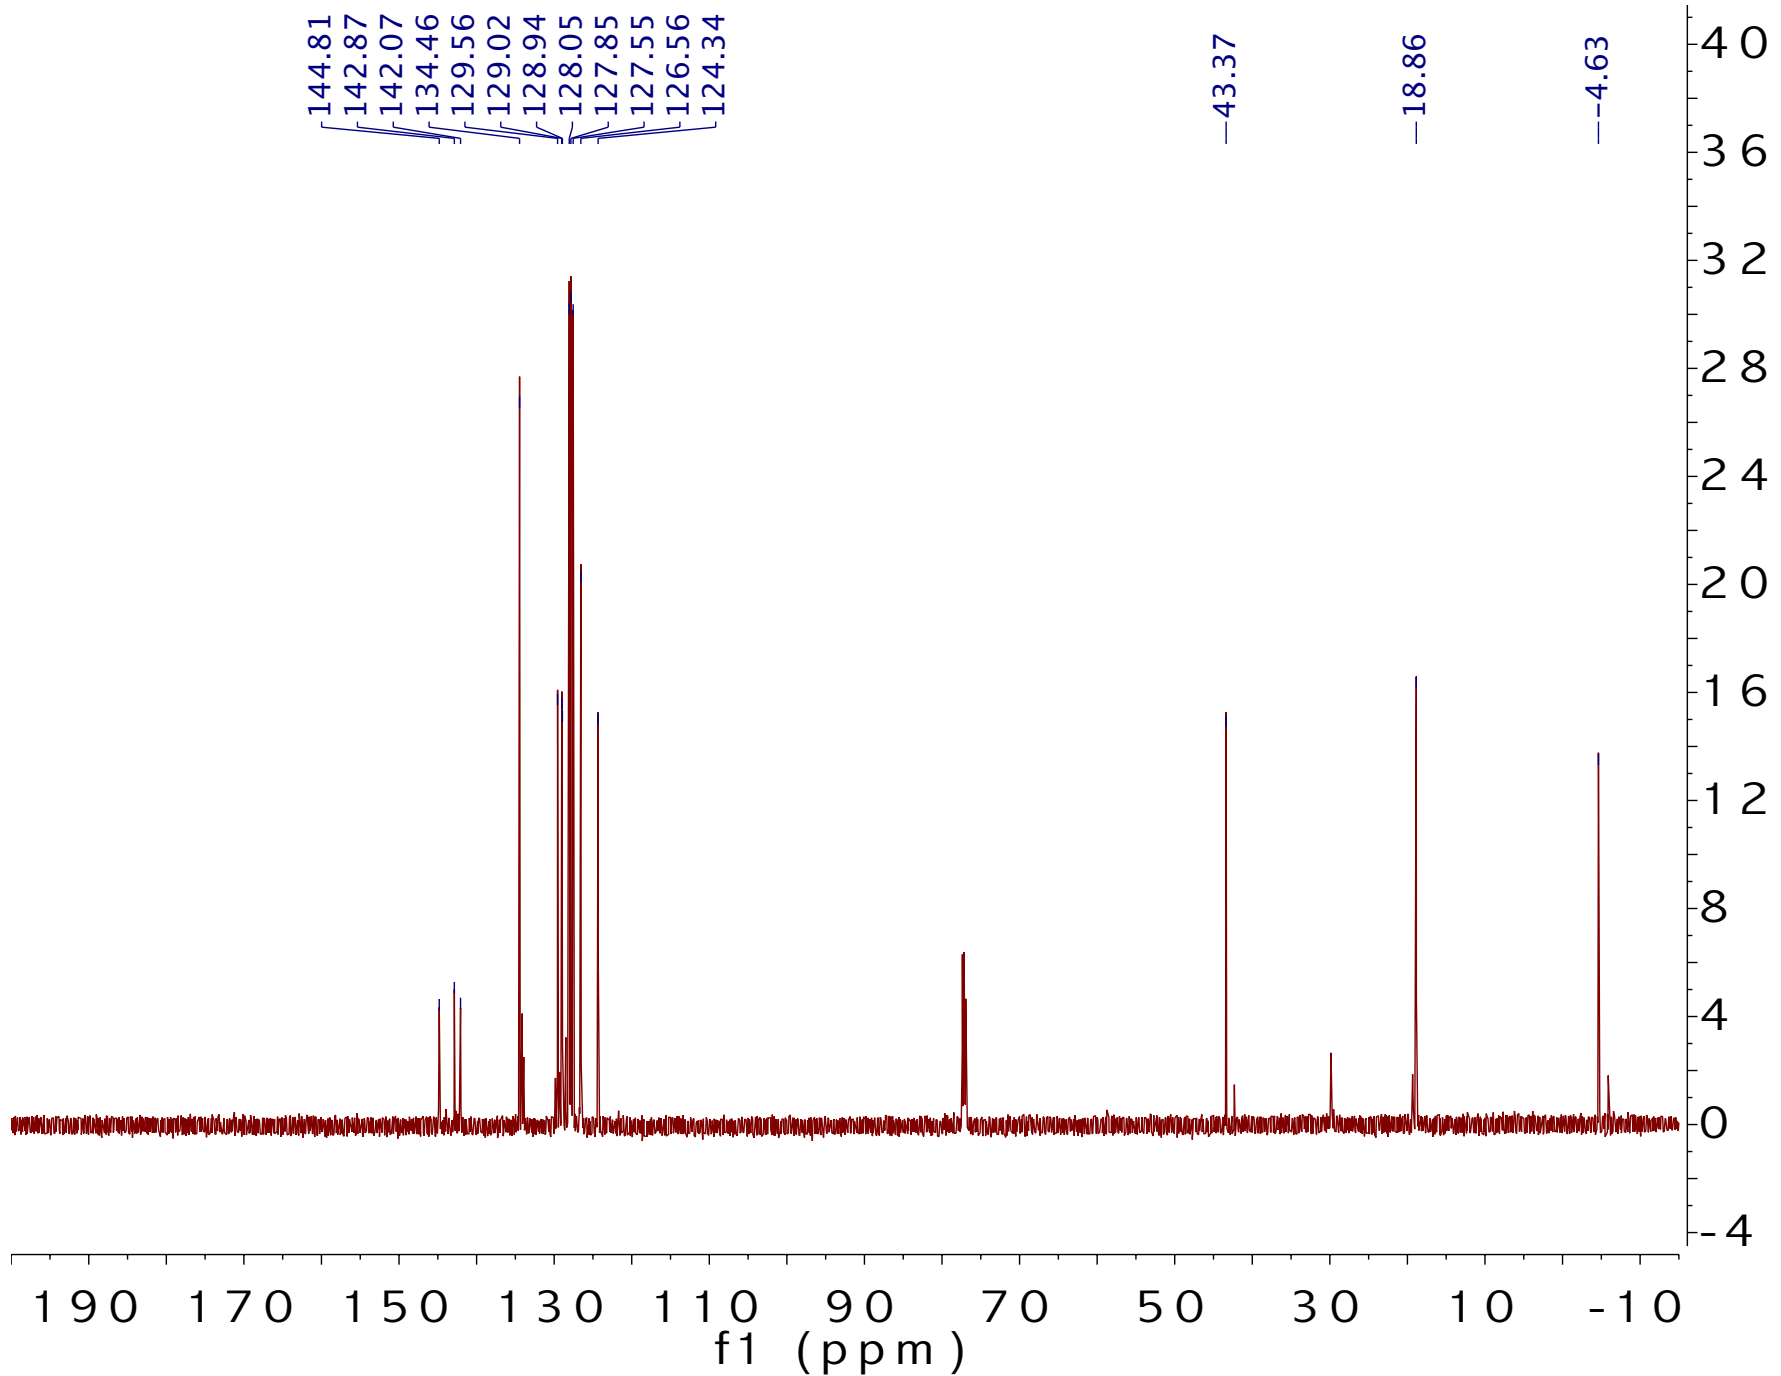

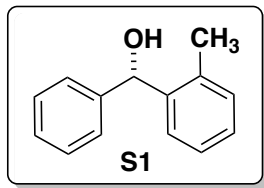

$^1\text{H}$ , 600 MHz,  $\text{CDCl}_3$

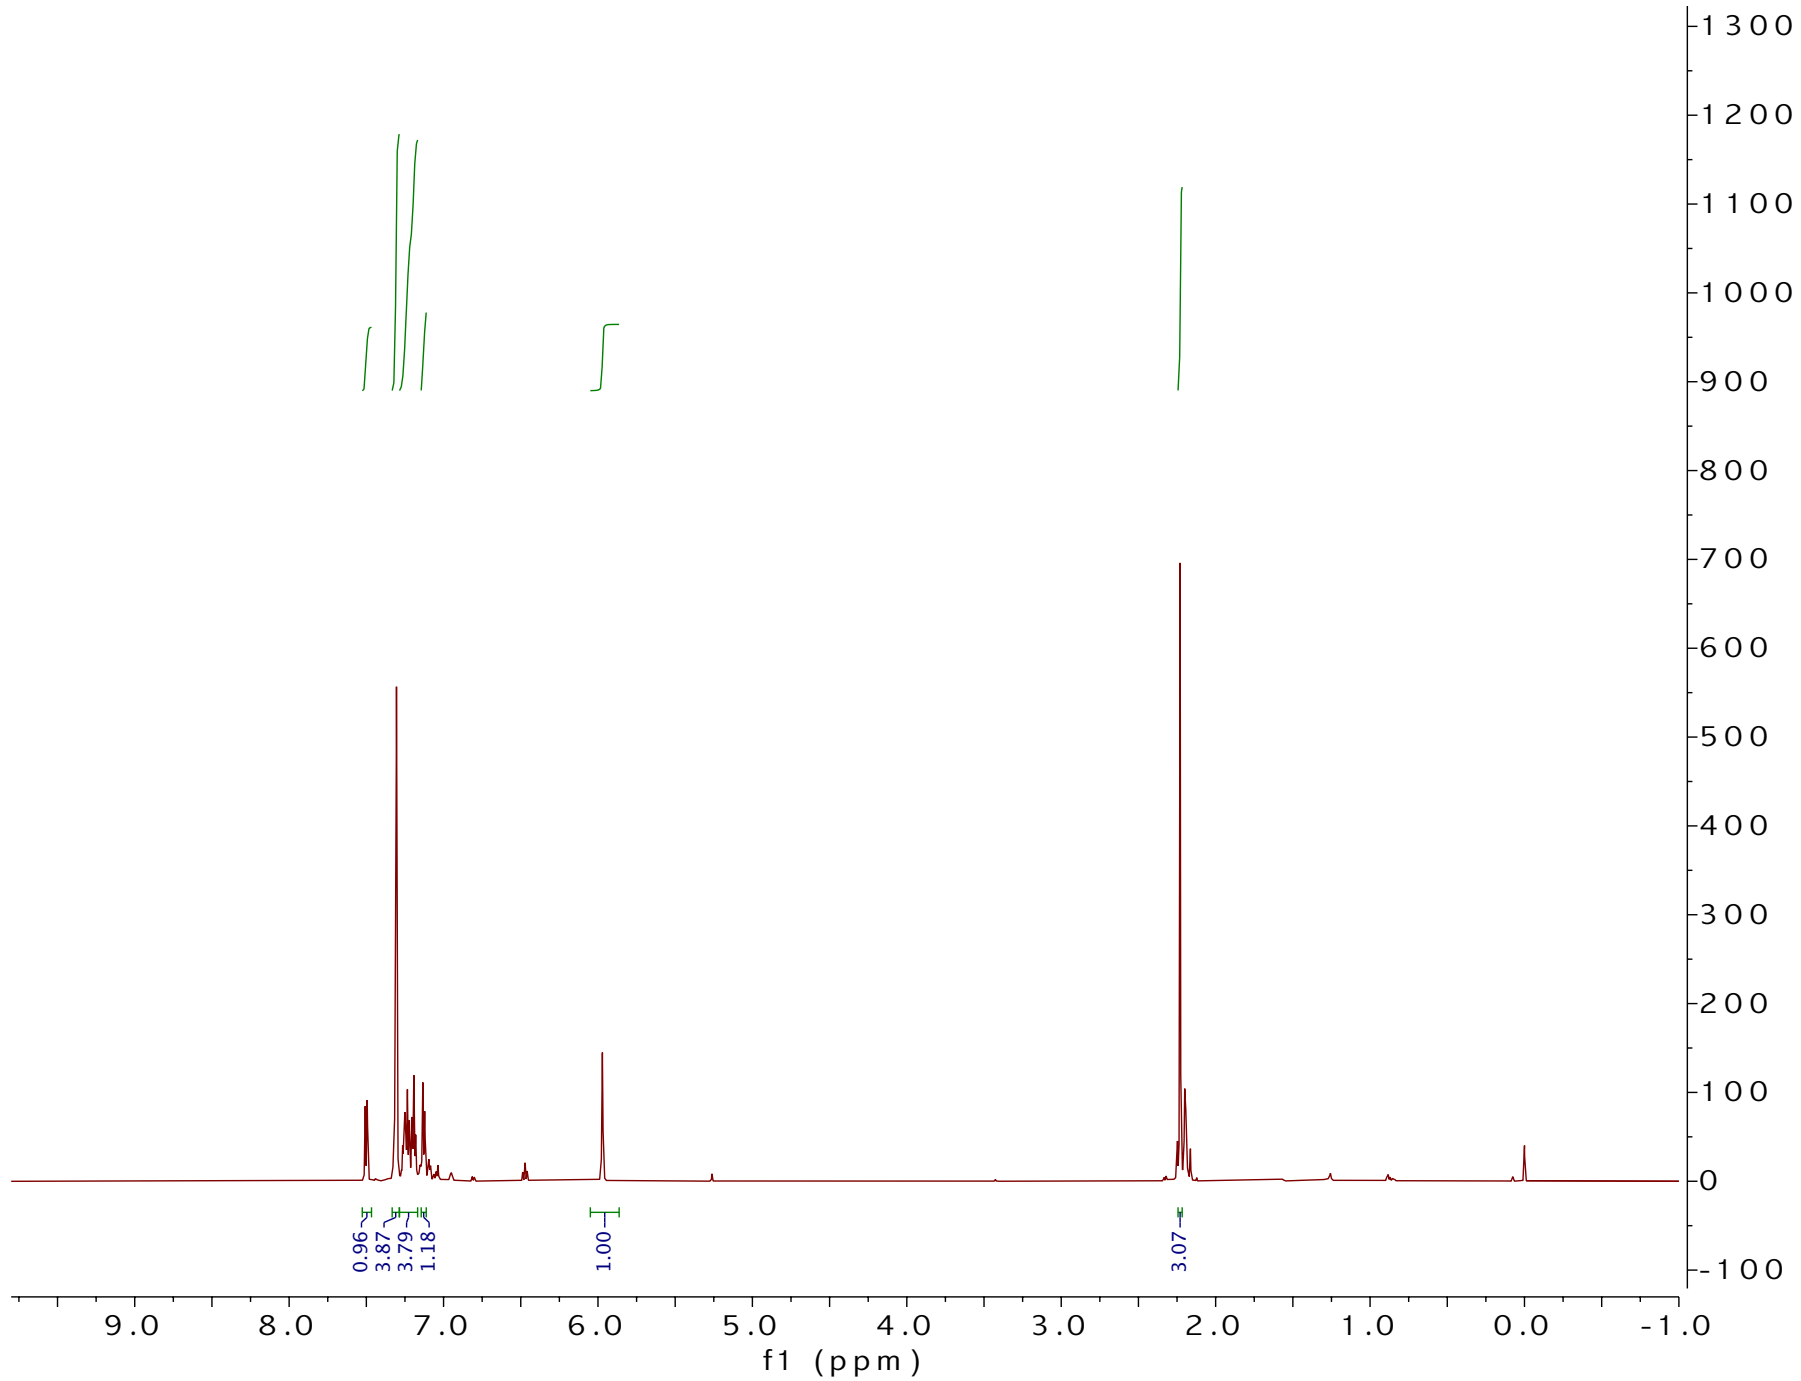

Supplement: NIHMS1653382-supplement-SI.pdf [file NIHMS1653382-supplement-SI.pdf]
